# Supplementary material for: Synthesis of chiral β-substituted γ-amino-butyric acid derivativesviaenantioconvergent ring opening of racemic 2-(hetero)aryl aziridines with ketene silyl acetals
Source: Royal Society of Chemistry journal article supplement (doi:10.1039/d2qo00450j), 2022-01-01

Electronic Supplementary Information *for*  
Synthesis of chiral  $\gamma$ -amino-butyric acid derivatives  
via enantioconvergent ring opening of racemic 2-  
(hetero)aryl aziridines with ketene silyl acetals

Ling Qi, Pei-Jun Yang, Wen-Tao Ji, Gui-De Tao, Gaosheng Yang and Zhuo Chai\*

Table of Contents

|                                                                                                           |     |
|-----------------------------------------------------------------------------------------------------------|-----|
| General Information.....                                                                                  | S2  |
| Sources of ketene silyl acetals <b>1</b> and aziridines <b>2</b> used in this study.....                  | S3  |
| Typical procedure for the enantioconvergent ring opening of aziridines with ketene silyl acetals<br>..... | S4  |
| Procedure for the transformation of ( <i>R/S</i> )- <b>3ak</b> to ( <i>R/S</i> )-rolipram .....           | S12 |
| References.....                                                                                           | S13 |
| Copies of HPLC Traces .....                                                                               | S14 |
| Copies of <sup>1</sup> H NMR and <sup>13</sup> C NMR Spectra for All New Compounds .....                  | S42 |

## General Information

Unless otherwise noted, commercial reagents and solvents were purified prior to use following the guidelines of Perrin and Armarego,<sup>1</sup> and the purified solvents of CH<sub>3</sub>CN, toluene and *m*-xylene were stored over activated molecular sieves 4Å. [(CH<sub>3</sub>CN)<sub>4</sub>Cu]PF<sub>6</sub>, chiral diphosphine ligands were purchased from commercial vendors and used as received. Chromatographic purification of products was accomplished by using forced-flow chromatography on Silicycle SiliaFlash<sup>®</sup> F60 40–63 μm, 60 Å silica gel. Thin-layer chromatography (TLC) was performed on silica gel plates (HSGF 254). Visualization of the developed chromatogram was performed by UV light, staining with iodine (dispersed in silica gel), or by KMnO<sub>4</sub> stain.

<sup>1</sup>H NMR spectra (500 MHz), <sup>13</sup>C NMR (125 MHz) and <sup>19</sup>F NMR (471 MHz) spectra data were recorded on Bruker AVANCE-500 spectrometers. <sup>1</sup>H NMR chemical shifts are reported in parts per million (ppm) and are referenced to residual protium in the NMR solvent ( $\delta$  7.26 for CHCl<sub>3</sub>). <sup>13</sup>C NMR chemical shifts are reported in parts per million (ppm) and are referenced to the carbon resonances of the solvent residual peak ( $\delta$  77.16 for CDCl<sub>3</sub>). <sup>19</sup>F NMR data recorded are listed by using CFCl<sub>3</sub> as external reference. Data for <sup>1</sup>H NMR are reported as follows: chemical shift ( $\delta$  ppm), multiplicity (s = singlet, d = doublet, t = triplet, q = quartet, m = multiplet), coupling constant (Hz) and integration. Data for <sup>13</sup>C NMR are recorded with broad-band proton decoupling technique and are reported in terms of chemical shift. Melting points were determined on a SGW X-4 melting apparatus and are uncorrected. Mass spectra were obtained on a Bruker Apex IV RTMS. High performance liquid chromatography (HPLC) was performed on a DIONEX UltiMate 3000 LC systems using Daicel CHIRALPAK<sup>®</sup> columns as noted.

## Sources of ketene silyl acetals **1** and aziridines **2** used in this study

Ketene silyl acetals **1a–1g** were prepared following literature methods.<sup>2</sup>

Aziridines **2** were prepared from the corresponding alkenes (8 mmol) and  $\text{PhI}=\text{NSO}_2\text{Ar}$  (4 mmol) following Evans' procedure by using  $\text{Cu}(\text{acac})_2$  (8 mol%) as catalyst in 30 mL of  $\text{CH}_3\text{CN}$ .<sup>3a</sup>

The spectroscopic data of all known compounds are in agreement with those previously reported.

Analytical data for aziridine substrates previously not reported:

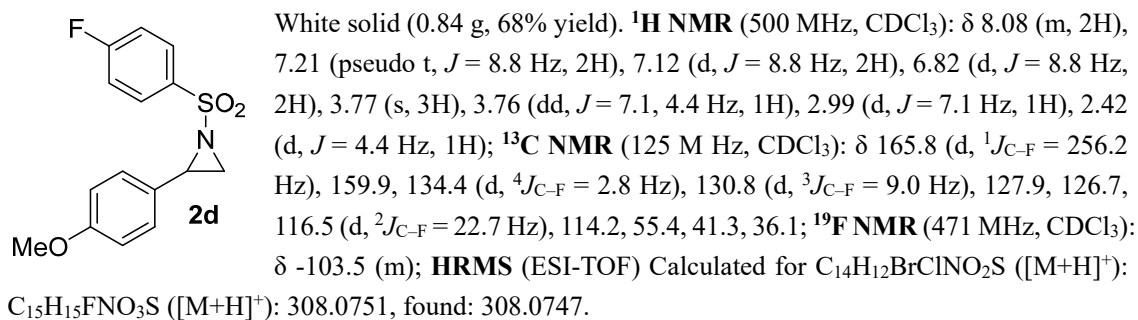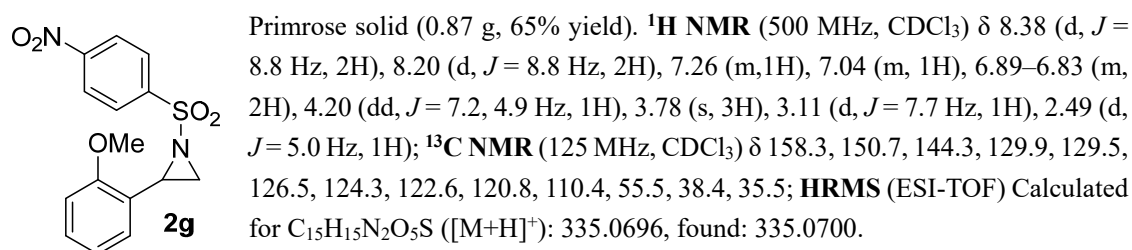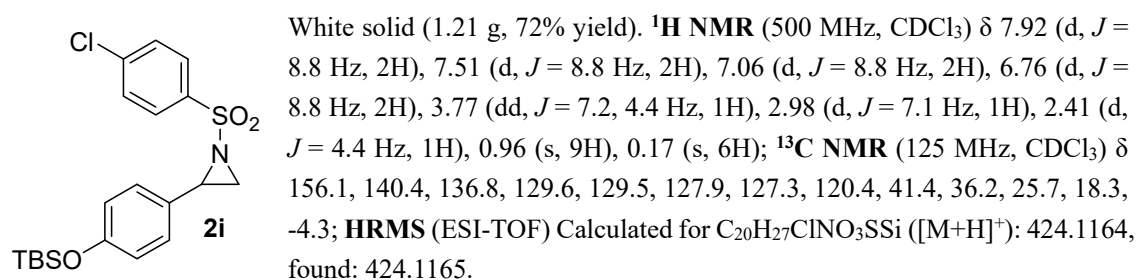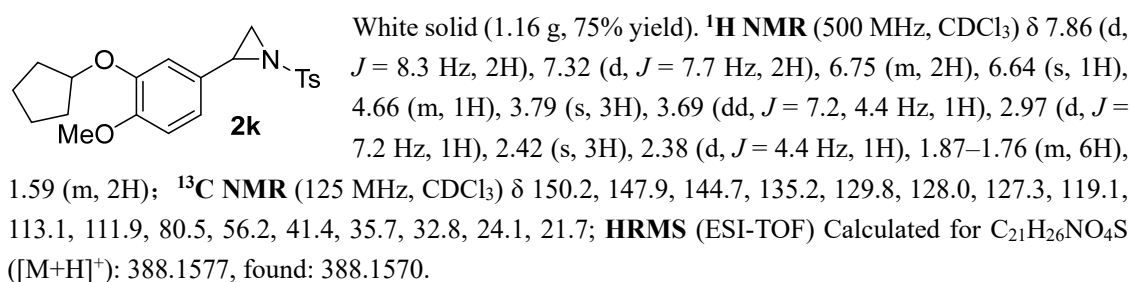

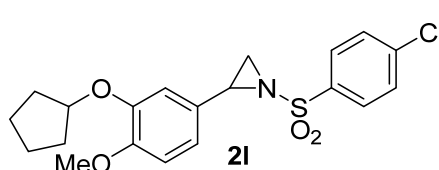

White solid (1.18 g, 72% yield). **<sup>1</sup>H NMR** (500 MHz, CDCl<sub>3</sub>) δ 7.92 (d, *J* = 8.8 Hz, 2H), 7.50 (d, *J* = 8.2 Hz, 2H), 6.78–6.73 (m, 2H), 6.63 (m, 1H), 4.67 (m, 1H), 3.80 (s, 3H), 3.73 (dd, *J* = 7.2, 4.4 Hz, 1H), 3.00 (d, *J* = 7.2 Hz, 1H), 2.43 (d, *J* = 4.4 Hz, 1H), 1.87–1.77 (m, 6H), 1.59 (m, 2H); **<sup>13</sup>C NMR** (125 MHz, CDCl<sub>3</sub>) δ 150.4, 147.9, 140.4, 136.9, 129.6, 129.4, 126.9, 119.1, 113.0, 111.9, 80.5, 56.2, 41.8, 35.9, 32.9, 24.2; **HRMS** (ESI-TOF) Calculated for C<sub>20</sub>H<sub>23</sub>ClNO<sub>4</sub>S ([M+H]<sup>+</sup>): 408.1031, found: 408.1026.

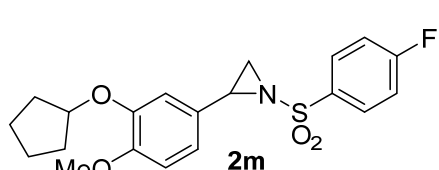

White solid (1.13 g, 72% yield). **<sup>1</sup>H NMR** (500 MHz, CDCl<sub>3</sub>) δ 8.06–7.94 (m, 2H), 7.21 (m, 2H), 6.78–6.73 (m, 2H), 6.65 (m, 1H), 4.68 (m, 1H), 3.80 (s, 3H), 3.72 (dd, *J* = 7.2, 4.4 Hz, 1H), 3.00 (d, *J* = 7.2 Hz, 1H), 2.42 (d, *J* = 4.4 Hz, 1H), 1.90–1.77 (m, 6H), 1.62–1.57 (m, 2H); **<sup>13</sup>C NMR** (125 MHz, CDCl<sub>3</sub>) δ 165.8 (d, <sup>1</sup>*J*<sub>C-F</sub> = 256.1 Hz), 150.4, 147.9, 134.4 (d, <sup>4</sup>*J*<sub>C-F</sub> = 2.8 Hz), 130.8 (d, <sup>3</sup>*J*<sub>C-F</sub> = 9.0 Hz), 127.0, 119.2, 116.5 (d, <sup>2</sup>*J*<sub>C-F</sub> = 22.7 Hz), 113.1, 112.0, 80.6, 56.2, 41.7, 35.9, 32.8, 24.1; **<sup>19</sup>F NMR** (471 MHz, CDCl<sub>3</sub>) δ -103.5 (m); **HRMS** (ESI-TOF) Calculated for C<sub>20</sub>H<sub>23</sub>FNO<sub>4</sub>S ([M+H]<sup>+</sup>): 392.1326, found: 392.1327.

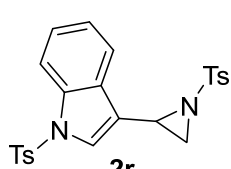

White solid (1.12 g, 60% yield). **<sup>1</sup>H NMR** (500 MHz, CDCl<sub>3</sub>) δ 7.92 (d, *J* = 8.2 Hz, 1H), 7.88 (d, *J* = 8.8 Hz, 2H), 7.72 (d, *J* = 8.2 Hz, 2H), 7.48 (d, *J* = 7.7 Hz, 1H), 7.45 (s, 1H), 7.34 (d, *J* = 8.2 Hz, 2H), 7.33–7.29 (m, 1H), 7.22–7.18 (m, 3H), 3.86 (dd, *J* = 7.1, 4.4 Hz, 1H), 2.99 (d, *J* = 7.2 Hz, 1H), 2.54 (d, *J* = 4.4 Hz, 1H), 2.45 (s, 3H), 2.34 (s, 3H); **<sup>13</sup>C NMR** (125 MHz, CDCl<sub>3</sub>) δ 145.4, 145.0, 135.2, 135.1, 134.9, 130.1, 130.0, 129.2, 128.2, 127.0, 125.3, 124.5, 123.6, 119.9, 117.3, 113.7, 34.7, 34.6, 21.8, 21.7; **HRMS** (ESI-TOF) Calculated for C<sub>24</sub>H<sub>23</sub>N<sub>2</sub>O<sub>4</sub>S<sub>2</sub> ([M+H]<sup>+</sup>): 467.1094, found: 467.1099.

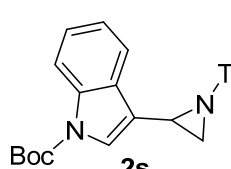

White solid (1.17 g, 71% yield). **<sup>1</sup>H NMR** (500 MHz, CDCl<sub>3</sub>) δ 8.09 (m, 1H), 7.89 (d, *J* = 8.2 Hz, 2H), 7.49–7.44 (m, 2H), 7.35–7.30 (m, 3H), 7.19 (pseudo t, *J* = 7.7 Hz, 1H), 3.90 (dd, *J* = 7.2, 4.4 Hz, 1H), 3.04 (d, *J* = 7.2 Hz, 1H), 2.61 (d, *J* = 4.4 Hz, 1H), 2.44 (s, 3H), 1.64 (s, 9H); **<sup>13</sup>C NMR** (125 MHz, CDCl<sub>3</sub>) δ 149.5, 144.9, 135.6, 135.1, 129.9, 129.0, 128.1, 125.0, 124.4, 123.0, 119.3, 115.5, 84.2, 35.2, 34.4, 28.3, 21.8; **HRMS** (ESI-TOF) Calculated for C<sub>22</sub>H<sub>25</sub>N<sub>2</sub>O<sub>4</sub>S ([M+H]<sup>+</sup>): 413.1530, found: 413.1531.

### Typical procedure for the enantioconvergent ring opening of aziridines with ketene silyl acetals.

Under argon atmosphere, to an oven-dried Schlenk tube was added [(CH<sub>3</sub>CN)<sub>4</sub>Cu]PF<sub>6</sub> (1.8 mg, 0.005 mmol) and (*S*)-BINAP (3.8 mg, 0.006 mmol). The system was evacuated under vacuum and back-

filled with argon (repeated twice). Then 1.0 mL of toluene was added and the resulting mixture was stirred at rt for 20 mins to give a white suspension, followed by the sequential addition of the aziridine **2** (0.1 mmol), ketene silyl acetal **1** (0.11 mmol) and 1.0 mL of toluene. The reaction mixture was stirred at 25±2 °C until the disappearance of **2** as monitored by TLC (visualized by staining with iodine and UV light). Then 10 mL of saturated aqueous NaHCO<sub>3</sub> solution and 10 mL of ethyl acetate (EtOAc) were added, and the phases were separated. The aqueous phase was extracted with EtOAc (3 x 5 mL). The combined organic phases were dried over anhydrous Na<sub>2</sub>SO<sub>4</sub> and concentrated via rotary evaporation under reduced pressure to provide the crude mixture. Then the crude mixture was purified by column chromatography (eluting with petroleum ether/EtOAc (v/v): 10:1–1:1 containing 0.5 v% triethylamine) to furnish the desired products. As noted in Table 1, in cases where the formation of the byproduct **3aa**' was considerable as judged by TLC, the crude mixture was pretreated with 1.0 mL of TBAF (1 M in THF) by stirring at rt for 1 h before being subjected to flash chromatography to provide the desired product.

The corresponding racemic products for HPLC assay were prepared following a similar procedure with [(CH<sub>3</sub>CN)<sub>4</sub>Cu]PF<sub>6</sub> (5 mol%), *rac*-BINAP (6 mol%), 0.11 mmol of the ketene silyl acetal **1** and 0.1 mmol of aziridine **2** in toluene.

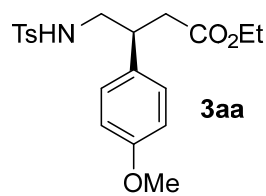
**3aa** Compound **3aa** was obtained as a white solid following the general procedure (34.1 mg, 87% yield). ee = 92%, [ $\alpha$ ]<sub>D</sub><sup>23</sup> = -99.3 (*c* = 0.62, CHCl<sub>3</sub>), **HPLC**: Daicel CHIRALCEL ID column,  $\lambda$  = 254 nm, Hexanes/IPA = 7:3, 1.0 mL/min, *t*<sub>R</sub>(minor) = 16.2 min, *t*<sub>R</sub>(major) = 17.3 min; **<sup>1</sup>H NMR** (500 MHz, CDCl<sub>3</sub>):  $\delta$  7.65 (d, *J* = 8.2 Hz, 2H), 7.27 (d, *J* = 7.7 Hz, 2H), 6.98 (d, *J* = 8.8 Hz, 2H), 7.79 (d, *J* = 8.8 Hz, 2H), 4.50 (m, 1H), 4.04 (ABX<sub>3</sub>, *J* = 11.0, 7.2 Hz, 2H), 3.77 (s, 3H), 3.25–3.17 (m, 2H), 3.05–3.00 (m, 1H), 2.59 (ABM, *J* = 16.0, 7.2 Hz, 2H), 2.42 (s, 3H), 1.15 (t, *J* = 7.2 Hz, 3H); **<sup>13</sup>C NMR** (125 MHz, CDCl<sub>3</sub>):  $\delta$  171.9, 159.0, 143.6, 137.0, 132.2, 129.8, 128.7, 127.2, 114.4, 60.8, 55.4, 48.1, 40.9, 38.6, 21.7, 14.2; **HRMS** (ESI-TOF) Calculated for C<sub>20</sub>H<sub>26</sub>NO<sub>5</sub>S ([M+H]<sup>+</sup>): 392.1526, found: 392.1535.

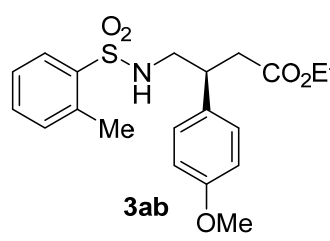
**3ab** Compound **3ab** was obtained as a colorless viscous oil following the general procedure (22.4 mg, 57% yield). ee = 90%, [ $\alpha$ ]<sub>D</sub><sup>23</sup> = +72.8 (*c* = 0.19, EtOH), **HPLC**: Daicel CHIRALCEL ID column,  $\lambda$  = 254 nm, Hexanes/IPA = 7:3, 1.0 mL/min, *t*<sub>R</sub>(minor) = 12.4 min, *t*<sub>R</sub>(major) = 13.1 min; **<sup>1</sup>H NMR** (500 MHz, CDCl<sub>3</sub>):  $\delta$  7.91 (d, *J* = 8.2 Hz, 1H), 7.45 (m, 1H), 7.32–7.25 (m, 2H), 6.97 (d, *J* = 8.8 Hz, 2H), 6.80 (d, *J* = 8.2 Hz, 2H), 4.47 (m, 1H), 4.03 (ABX<sub>3</sub>, *J* = 11.0, 7.1 Hz, 2H), 3.78 (s, 3H), 3.28–3.16 (m, 2H), 3.05–2.99 (m, 1H), 2.56 (ABM, *J* = 15.9, 7.1 Hz, 2H), 2.42 (s, 3H), 1.15 (t, *J* = 7.1 Hz, 3H); **<sup>13</sup>C NMR** (125 MHz, CDCl<sub>3</sub>):  $\delta$  171.8, 159.1, 137.7, 137.1, 132.9, 132.7, 132.1, 129.7, 128.6, 126.3, 114.5, 60.8, 55.4, 48.0, 41.0, 38.7, 20.2, 14.2; **HRMS** (ESI-TOF) Calculated for C<sub>20</sub>H<sub>26</sub>NO<sub>5</sub>S ([M+H]<sup>+</sup>): 392.1526, found: 392.1533.

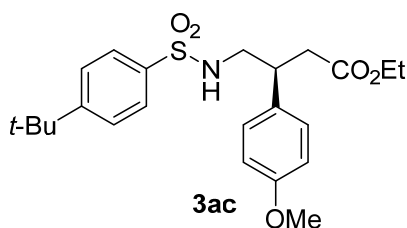

Compound **3ac** was obtained as a colorless viscous oil following the general procedure (36.5 mg, 84% yield). ee = 93%,  $[\alpha]_D^{23} = -43.1$  ( $c = 0.70$ ,  $\text{CHCl}_3$ ), **HPLC**: Daicel CHIRALCEL ID column,  $\lambda = 254$  nm, Hexanes/IPA = 7:3, 1.0 mL/min,  $t_R(\text{minor}) = 13.0$  min,  $t_R(\text{major}) = 16.7$  min;  **$^1\text{H NMR}$**  (500 MHz,  $\text{CDCl}_3$ ):  $\delta$  7.69 (d,  $J = 8.3$  Hz, 2H), 7.49 (d,  $J = 8.3$  Hz, 2H), 6.99 (d,  $J = 8.3$  Hz, 2H), 6.80 (d,  $J = 8.2$  Hz, 2H), 4.35 (m, 1H), 4.04 (ABX<sub>3</sub>,  $J = 11.0$ , 7.2 Hz, 2H), 3.78 (s, 3H), 3.29–3.19 (m, 2H), 3.09–3.03 (m, 1H), 2.60 (ABM,  $J = 16.0$ , 7.2 Hz, 2H), 1.34 (s, 9H), 1.16 (t,  $J = 7.2$  Hz, 3H);  **$^{13}\text{C NMR}$**  (125 MHz,  $\text{CDCl}_3$ ):  $\delta$  171.9, 159.0, 156.6, 137.0, 132.2, 128.7, 127.0, 126.2, 114.5, 60.8, 55.4, 48.2, 41.0, 38.6, 35.3, 31.2, 14.2; **HRMS** (ESI-TOF) Calculated for  $\text{C}_{23}\text{H}_{32}\text{NO}_5\text{S}$  ( $[\text{M}+\text{H}]^+$ ): 434.1996, found: 434.1992.

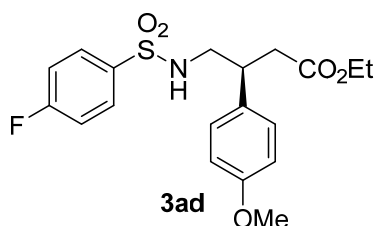

Compound **3ad** was obtained as a primrose solid following the general procedure (31.1 mg, 78% yield). ee = 94%,  $[\alpha]_D^{23} = -35.0$  ( $c = 0.60$ ,  $\text{CHCl}_3$ ), **HPLC**: Daicel CHIRALCEL ID column,  $\lambda = 254$  nm, Hexanes/IPA = 4:1, 1.0 mL/min,  $t_R(\text{minor}) = 16.1$  min,  $t_R(\text{major}) = 17.1$  min;  **$^1\text{H NMR}$**  (500 MHz,  $\text{CDCl}_3$ ):  $\delta$  7.77 (m, 2H), 7.14 (pseudo t,  $J = 8.8$  Hz, 2H), 6.98 (d,  $J = 8.8$  Hz, 2H), 6.79 (d,  $J = 8.8$  Hz, 2H), 4.66 (dd,  $J = 7.2$ , 5.0 Hz, 1H), 4.04 (ABX<sub>3</sub>,  $J = 11.0$ , 7.1 Hz, 2H), 3.76 (s, 3H), 3.28–3.17 (m, 2H), 3.07–3.03 (m, 1H), 2.59 (ABM,  $J = 16.0$ , 7.2 Hz, 2H), 1.16 (t,  $J = 7.1$  Hz, 3H);  **$^{13}\text{C NMR}$**  (125 MHz,  $\text{CDCl}_3$ ):  $\delta$  171.9, 165.1 (d,  $^1J_{\text{C-F}} = 254.3$  Hz), 159.0, 136.1 (d,  $^4J_{\text{C-F}} = 2.7$  Hz), 132.1, 129.9 (d,  $^3J_{\text{C-F}} = 9.0$  Hz), 128.6, 116.4 (d,  $^2J_{\text{C-F}} = 22.7$  Hz), 114.4, 60.8, 55.3, 48.1, 40.9, 38.5, 14.2;  **$^{19}\text{F NMR}$**  (470 MHz,  $\text{CDCl}_3$ )  $\delta$  -105.4 (m); **HRMS** (ESI-TOF) Calculated for  $\text{C}_{19}\text{H}_{23}\text{FNO}_5\text{S}$  ( $[\text{M}+\text{H}]^+$ ): 396.1275, found: 396.1280.

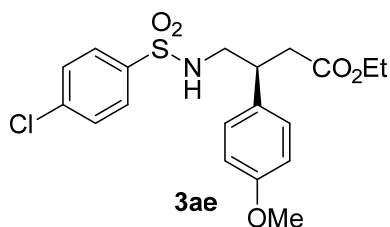

Compound **3ae** was obtained as a white solid following the general procedure (34.3 mg, 83% yield). ee = 94%,  $[\alpha]_D^{23} = -96.1$  ( $c = 0.69$ ,  $\text{CHCl}_3$ ), **HPLC**: Daicel CHIRALCEL ID column,  $\lambda = 254$  nm, Hexanes/IPA = 9:1, 1.0 mL/min,  $t_R(\text{minor}) = 37.6$  min,  $t_R(\text{major}) = 39.3$  min;  **$^1\text{H NMR}$**  (500 MHz,  $\text{CDCl}_3$ ):  $\delta$  7.69 (d,  $J = 8.8$  Hz, 2H), 7.43 (d,  $J = 8.8$  Hz, 2H), 6.97 (d,  $J = 8.3$  Hz, 2H), 6.79 (d,  $J = 8.8$  Hz, 2H), 4.67 (dd,  $J = 7.2$ , 5.0 Hz, 1H), 4.04 (ABX<sub>3</sub>,  $J = 11.0$ , 7.2 Hz, 2H), 3.77 (s, 3H), 3.29–3.17 (m, 2H), 3.08–3.03 (m, 1H), 2.59 (ABM,  $J = 16.0$ , 7.2 Hz, 1H), 1.16 (t,  $J = 7.2$  Hz, 3H);  **$^{13}\text{C NMR}$**  (125 MHz,  $\text{CDCl}_3$ ):  $\delta$  171.9, 159.0, 139.2, 138.6, 132.0, 129.5, 128.6, 114.4, 60.8, 55.4, 48.2, 40.9, 38.5, 14.2; **HRMS** (ESI-TOF) Calculated for  $\text{C}_{19}\text{H}_{23}\text{ClNO}_5\text{S}$  ( $[\text{M}+\text{H}]^+$ ): 412.0980, found: 412.0987.

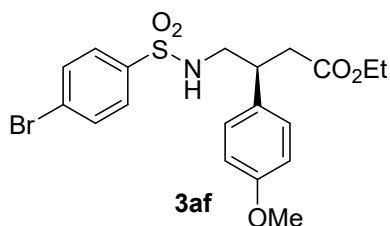

Compound **3af** was obtained as a white solid following the general procedure (30.3 mg, 66% yield). ee = 97%,  $[\alpha]_D^{23} = -22.3$  ( $c = 0.58$ ,  $\text{CHCl}_3$ ), **HPLC**: Daicel CHIRALCEL AS-H column,  $\lambda = 254$  nm, Hexanes/IPA = 7:3, 1.0 mL/min,  $t_R(\text{major}) = 31.5$  min,  $t_R(\text{minor}) = 36.7$  min;  **$^1\text{H NMR}$**  (500 MHz,  $\text{CDCl}_3$ ):  $\delta$  7.61 (m,

4H), 6.98 (d,  $J = 8.8$  Hz, 2H), 6.80 (d,  $J = 8.8$  Hz, 2H), 4.60 (dd,  $J = 7.2, 5.0$  Hz, 1H), 4.05 (ABX<sub>3</sub>,  $J = 11.0, 7.2$  Hz, 2H), 3.78 (s, 3H), 3.29–3.23 (m, 2H), 3.08–3.03 (m, 1H), 2.59 (ABM,  $J = 16.0, 7.2$  Hz, 2H), 1.17 (t,  $J = 7.2$  Hz, 3H); <sup>13</sup>C NMR (125 MHz, CDCl<sub>3</sub>): δ 171.9, 159.0, 139.1, 132.5, 132.0, 128.7, 128.6, 127.7, 114.5, 60.8, 55.4, 48.2, 40.9, 38.5, 14.2; HRMS (ESI-TOF) Calculated for C<sub>19</sub>H<sub>23</sub>BrNO<sub>5</sub>S ([M+H]<sup>+</sup>): 456.0475, found: 456.0467.

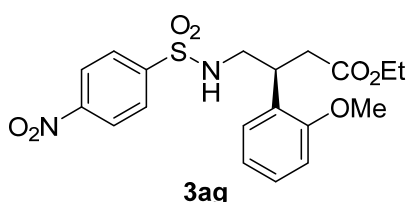

Compound **3ag** was obtained as a white solid following the general procedure (12.3 mg, 39% yield). ee = 92%,  $[\alpha]_{\text{D}}^{23} = +132.1$  ( $c = 0.16$ , CHCl<sub>3</sub>), HPLC: Daicel CHIRALCEL AS-H column,  $\lambda = 254$  nm, Hexanes/IPA = 7:3, 1.0 mL/min,  $t_{\text{R}}$ (major) = 35.2 min,  $t_{\text{R}}$ (minor) = 41.3 min; <sup>1</sup>H NMR (500 MHz, CDCl<sub>3</sub>): δ 8.26 (d,  $J = 8.8$  Hz, 2H), 7.88 (d,  $J = 8.8$  Hz, 2H), 7.22–7.19 (m, 1H), 6.95 (dd,  $J = 7.2, 1.7$  Hz, 1H), 6.85 (dd,  $J = 7.7, 6.6$  Hz, 1H), 6.80 (d,  $J = 8.3$  Hz, 1H), 4.92 (pseudo t,  $J = 5.8$  Hz, 1H), 4.07 (ABX<sub>3</sub>,  $J = 11.0, 7.1$  Hz, 2H), 3.75 (s, 3H), 3.62–3.55 (m, 1H), 3.41–3.36 (m, 1H), 3.30–3.25 (m, 1H), 2.67 (ABM,  $J = 16.0, 6.0$  Hz, 2H), 1.18 (t,  $J = 7.1$  Hz, 3H); <sup>13</sup>C NMR (125 MHz, CDCl<sub>3</sub>): δ 172.4, 157.2, 150.0, 146.1, 128.8, 128.5, 128.3, 128.0, 124.3, 121.2, 111.1, 60.9, 55.5, 46.9, 36.8, 36.3, 14.2; HRMS (ESI-TOF) Calculated for C<sub>19</sub>H<sub>23</sub>N<sub>2</sub>O<sub>7</sub>S ([M+H]<sup>+</sup>): 423.1220, found: 423.1229.

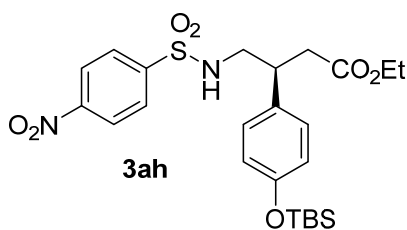

Compound **3ah** was obtained as a colorless viscous oil following the general procedure (25.8 mg, 51% yield). ee = 90%,  $[\alpha]_{\text{D}}^{23} = -4.4$  ( $c = 0.25$ , EtOH), HPLC: Daicel CHIRALCEL AS-H column,  $\lambda = 254$  nm, Hexanes/IPA = 7:3, 1.0 mL/min,  $t_{\text{R}}$ (minor) = 8.4 min,  $t_{\text{R}}$ (major) = 10.8 min; <sup>1</sup>H NMR (500 MHz, CDCl<sub>3</sub>): δ 8.31 (d,  $J = 8.8$  Hz, 2H), 7.94 (d,  $J = 8.8$  Hz, 2H), 6.90 (d,  $J = 8.2$  Hz, 2H), 6.72 (d,  $J = 8.2$  Hz, 2H), 4.79 (dd,  $J = 7.1, 5.0$  Hz, 1H), 4.06 (q,  $J = 7.2$  Hz, 2H), 3.38–3.32 (m, 1H), 3.21–3.10 (m, 2H), 2.59 (ABM,  $J = 16.0, 7.7$  Hz, 2H), 1.17 (t,  $J = 7.2$  Hz, 3H), 0.97 (s, 9H), 0.18 (s, 6H); <sup>13</sup>C NMR (125 MHz, CDCl<sub>3</sub>): δ 172.0, 155.3, 150.2, 146.1, 132.4, 128.5, 128.4, 124.5, 120.7, 61.0, 48.3, 41.0, 38.5, 25.8, 18.3, 14.2, -4.3; HRMS (ESI-TOF) Calculated for C<sub>24</sub>H<sub>35</sub>N<sub>2</sub>O<sub>7</sub>SSi ([M+H]<sup>+</sup>): 523.1929, found: 523.1923.

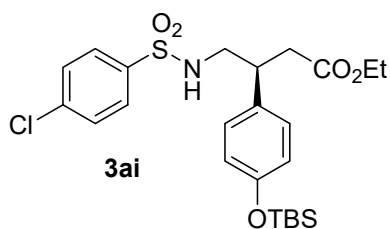

Compound **3ai** was obtained as a colorless viscous oil following the general procedure (48.0 mg, 94% yield). ee = 95%,  $[\alpha]_{\text{D}}^{23} = +19.7$  ( $c = 0.95$ , CHCl<sub>3</sub>), HPLC: Daicel CHIRALCEL AS-H column,  $\lambda = 254$  nm, Hexanes/IPA = 7:3, 1.0 mL/min,  $t_{\text{R}}$ (minor) = 7.4 min,  $t_{\text{R}}$ (major) = 10.3 min; <sup>1</sup>H NMR (500 MHz, CDCl<sub>3</sub>): δ 7.70 (d,  $J = 8.8$  Hz, 2H), 7.45 (d,  $J = 8.2$  Hz, 2H), 6.91 (d,  $J = 8.2$  Hz, 2H), 6.73 (d,  $J = 8.8$  Hz, 2H), 4.54 (brs, 1H), 4.05 (ABX<sub>3</sub>,  $J = 11.0, 7.1$  Hz, 2H), 3.30–3.24 (m, 1H), 3.21–3.15 (m, 1H), 3.08–3.03 (m, 1H), 2.67 (ABM,  $J = 15.9, 7.7$  Hz, 2H), 1.16 (t,  $J = 7.1$  Hz, 3H), 0.97 (s, 9H), 0.18 (s, 6H); <sup>13</sup>C NMR (125 MHz, CDCl<sub>3</sub>): δ 171.9, 155.2, 139.3, 138.6, 132.6, 129.5, 128.6, 128.5, 120.6, 60.8, 48.1, 40.9, 38.5, 25.8, 18.3, 14.2, -4.3; HRMS (ESI-TOF) Calculated for C<sub>24</sub>H<sub>35</sub>ClNO<sub>5</sub>SSi ([M+H]<sup>+</sup>): 512.1688, found: 512.1686.

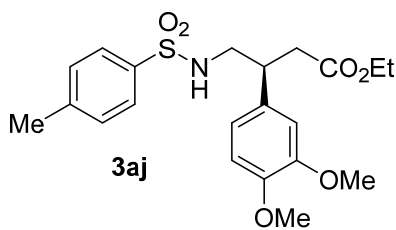

Compound **3aj** was obtained as a colorless viscous oil following the general procedure (27.7 mg, 66% yield). ee = 83%,  $[\alpha]_D^{23} = +51.1$  ( $c = 0.28$ , EtOH), **HPLC**: Daicel CHIRALCEL AD-H column,  $\lambda = 254$  nm, Hexanes/IPA = 4:1, 1.0 mL/min,  $t_R$ (major) = 19.8 min,  $t_R$ (minor) = 22.9 min; **<sup>1</sup>H NMR** (500 MHz, CDCl<sub>3</sub>):  $\delta$  7.64 (d,  $J = 7.7$  Hz, 2H), 7.27 (d,  $J = 8.8$  Hz, 2H), 6.76 (d,  $J = 7.7$  Hz, 1H), 6.62 (d,  $J = 7.7$  Hz, 1H), 6.55 (s, 1H), 4.41 (dd,  $J = 7.1, 5.0$  Hz, 1H), 4.05 (ABX<sub>3</sub>,  $J = 11.0, 7.1$  Hz, 2H), 3.84 (s, 3H), 3.80 (s, 3H), 3.28–3.17 (m, 2H), 3.06–3.02 (m, 1H), 2.60 (ABM,  $J = 16.0, 7.2$  Hz, 2H), 2.41 (s, 3H), 1.17 (t,  $J = 7.1$  Hz, 3H); **<sup>13</sup>C NMR** (125 MHz, CDCl<sub>3</sub>):  $\delta$  171.9, 149.3, 148.5, 143.6, 137.0, 132.7, 129.8, 127.2, 119.6, 111.6, 110.7, 60.8, 56.0, 55.95, 48.1, 41.3, 38.5, 21.6, 14.2; **HRMS** (ESI-TOF) Calculated for C<sub>21</sub>H<sub>28</sub>NO<sub>6</sub>S ([M+H]<sup>+</sup>): 422.1632, found: 422.1625.

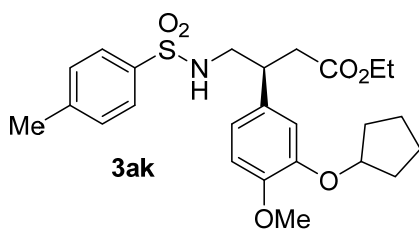

Compound (*S*)-**3ak** was obtained as a white solid following the general procedure (42.6 mg, 89% yield). ee = 89%,  $[\alpha]_D^{23} = +33.0$  ( $c = 0.84$ , CHCl<sub>3</sub>), **HPLC**: Daicel CHIRALCEL AS-H column,  $\lambda = 254$  nm, Hexanes/IPA = 7:3, 1.0 mL/min,  $t_R$ (major) = 21.3 min,  $t_R$ (minor) = 27.9 min; **<sup>1</sup>H NMR** (500 MHz, CDCl<sub>3</sub>):  $\delta$  7.64 (d,  $J = 8.2$  Hz, 2H), 7.26 (d,  $J = 8.2$  Hz, 2H), 6.74 (d,  $J = 8.2$  Hz, 1H), 6.61–6.55 (m, 2H), 4.67 (m, 1H), 4.49 (dd,  $J = 7.3, 5.0$  Hz, 1H), 4.04 (ABX<sub>3</sub>,  $J = 11.0, 7.2$  Hz, 2H), 3.80 (s, 3H), 3.26–3.14 (m, 2H), 3.04–2.99 (m, 1H), 2.60 (ABM,  $J = 16.0, 7.2$  Hz, 2H), 2.41 (s, 3H), 1.92–1.78 (m, 6H), 1.59 (m, 2H), 1.16 (t,  $J = 7.2$  Hz, 3H); **<sup>13</sup>C NMR** (125 MHz, CDCl<sub>3</sub>):  $\delta$  171.9, 149.4, 148.0, 143.5, 136.9, 132.5, 129.8, 127.2, 119.6, 114.3, 112.3, 80.5, 60.8, 56.2, 48.1, 41.2, 38.5, 32.9, 24.1, 21.6, 14.2; **HRMS** (ESI-TOF) Calculated for C<sub>25</sub>H<sub>34</sub>NO<sub>6</sub>S ([M+H]<sup>+</sup>): 476.2101, found: 476.2109.

The compound (*R*)-**3ak** was obtained as a white solid following the general procedure (42.6 mg, 89% yield) except that (*R*)-BINAP was used as ligand. The spectral data are in agreement with those of (*S*)-**3ak**. ee = 89%,  $[\alpha]_D^{23} = -34.2$  ( $c = 0.80$ , CHCl<sub>3</sub>), **HPLC**: Daicel CHIRALCEL AS-H column,  $\lambda = 254$  nm, Hexanes/IPA = 7:3, 1.0 mL/min,  $t_R$ (minor) = 22.0 min,  $t_R$ (major) = 26.3 min.

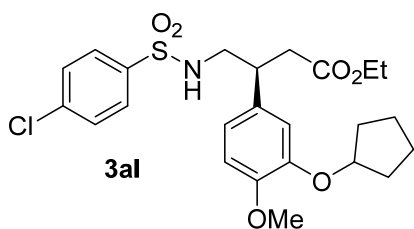

Compound **3al** was obtained as a white solid following the general procedure (35.2 mg, 71% yield). ee = 88%,  $[\alpha]_D^{23} = -89.1$  ( $c = 0.68$ , CHCl<sub>3</sub>), **HPLC**: Daicel CHIRALCEL AS-H column,  $\lambda = 254$  nm, Hexanes/IPA = 7:3, 1.0 mL/min,  $t_R$ (major) = 21.1 min,  $t_R$ (minor) = 26.7 min; **<sup>1</sup>H NMR** (500 MHz, CDCl<sub>3</sub>):  $\delta$  7.69 (d,  $J = 8.8$  Hz, 2H), 7.45 (d,  $J = 8.8$  Hz, 2H), 6.75 (d,  $J = 8.3$  Hz, 1H), 6.59–6.55 (m, 2H), 4.67 (m, 1H), 4.48 (dd,  $J = 7.7, 4.4$  Hz, 1H), 4.07 (ABX<sub>3</sub>,  $J = 11.0, 7.1$  Hz, 2H), 3.81 (s, 3H), 3.31–3.26 (m, 1H), 3.20–3.13 (m, 1H), 3.07–3.01 (m, 1H), 2.59 (ABM,  $J = 16.0, 7.2$  Hz, 2H), 1.90–1.78 (m, 6H), 1.60 (m, 2H), 1.18 (t,  $J = 7.1$  Hz, 3H); **<sup>13</sup>C NMR** (125 MHz, CDCl<sub>3</sub>):  $\delta$  171.9, 149.5, 148.1, 139.2, 138.5, 132.3, 129.5, 128.6, 119.5, 114.3, 112.3, 80.6, 60.9, 56.2, 48.1, 41.1, 38.5, 32.9, 24.2, 14.2; **HRMS** (ESI-TOF) Calculated for C<sub>24</sub>H<sub>31</sub>ClNO<sub>6</sub>S ([M+H]<sup>+</sup>): 496.1555, found: 496.1563.



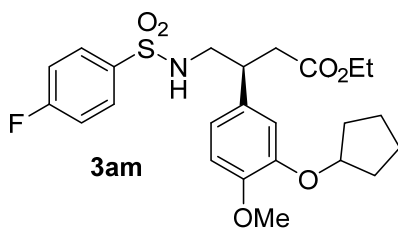

Compound **3am** was obtained as a white solid following the general procedure (34.6 mg, 72% yield). ee = 88%,  $[\alpha]_D^{23} = -31.8$  ( $c = 0.69$ ,  $\text{CHCl}_3$ ), **HPLC**: Daicel CHIRALCEL AS-H column,  $\lambda = 254$  nm, Hexanes/IPA = 7:3, 1.0 mL/min,  $t_R(\text{major}) = 20.3$  min,  $t_R(\text{minor}) = 26.7$  min;  **$^1\text{H NMR}$**  (500 MHz,  $\text{CDCl}_3$ ):  $\delta$  7.77 (m, 2H), 7.15 (pseudo t,  $J = 8.2$  Hz, 2H), 6.74 (d,  $J = 8.3$  Hz, 1H), 6.60–6.55 (m, 2H), 4.67 (m, 1H), 4.57 (dd,  $J = 7.2, 4.9$  Hz, 1H), 4.05 (ABX<sub>3</sub>,  $J = 11.0, 7.2$  Hz, 2H), 3.80 (s, 3H), 3.29–3.24 (m, 1H), 3.20–3.14 (m, 1H), 3.06–3.00 (m, 1H), 2.59 (ABM,  $J = 16.0, 7.2$  Hz, 2H), 1.92–1.76 (m, 6H), 1.59 (m, 2H), 1.16 (t,  $J = 7.2$  Hz, 3H);  **$^{13}\text{C NMR}$**  (125 MHz,  $\text{CDCl}_3$ ):  $\delta$  171.9, 165.1 (d,  $^1J_{\text{C-F}} = 254.3$  Hz), 149.5, 147.8, 136.0 (d,  $^4J_{\text{C-F}} = 3.6$  Hz), 132.4, 129.8 (d,  $^3J_{\text{C-F}} = 9.1$  Hz), 119.6, 116.4 (d,  $^2J_{\text{C-F}} = 22.8$  Hz), 114.2, 112.3, 80.5, 60.8, 56.1, 48.1, 41.1, 38.5, 32.8, 24.1, 14.2;  **$^{19}\text{F NMR}$**  (470 MHz,  $\text{CDCl}_3$ )  $\delta$  -105.3 (m); **HRMS** (ESI-TOF) Calculated for  $\text{C}_{24}\text{H}_{31}\text{FNO}_6\text{S}$  ( $[\text{M}+\text{H}]^+$ ): 480.1851, found: 480.1845.

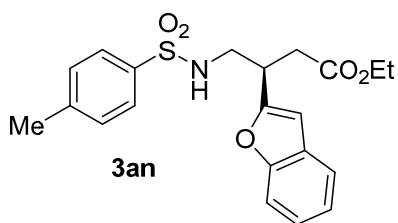

Compound **3an** was obtained as a white solid following the general procedure (28.2 mg, 70% yield). ee = 89%,  $[\alpha]_D^{23} = +19.3$  ( $c = 0.55$ ,  $\text{CHCl}_3$ ), **HPLC**: Daicel CHIRALCEL AS-H column,  $\lambda = 254$  nm, Hexanes/IPA = 7:3, 1.0 mL/min,  $\lambda = 254$  nm,  $t_R(\text{major}) = 21.9$  min,  $t_R(\text{minor}) = 30.3$  min;  **$^1\text{H NMR}$**  (500 MHz,  $\text{CDCl}_3$ ):  $\delta$  7.67 (d,  $J = 8.2$  Hz, 2H), 7.47 (m, 1H), 7.35 (d,  $J = 7.7$  Hz, 1H), 7.26–7.17 (m, 4H), 6.45 (s, 1H), 4.77 (pseudo t,  $J = 6.6$  Hz, 1H), 4.10 (ABX<sub>3</sub>,  $J = 11.0, 7.1$  Hz, 2H), 3.57–3.52 (m, 1H), 3.38–3.29 (m, 2H), 2.76 (d,  $J = 7.1$  Hz, 2H), 2.39 (s, 3H), 1.20 (t,  $J = 7.1$  Hz, 3H);  **$^{13}\text{C NMR}$**  (125 MHz,  $\text{CDCl}_3$ ):  $\delta$  171.5, 156.7, 154.8, 143.6, 136.9, 129.8, 128.2, 127.1, 124.2, 123.0, 120.9, 111.1, 104.1, 61.0, 45.5, 36.0, 35.5, 21.6, 14.2; **HRMS** (ESI-TOF) Calculated for  $\text{C}_{21}\text{H}_{24}\text{NO}_5\text{S}$  ( $[\text{M}+\text{H}]^+$ ): 402.1370, found: 402.1365.

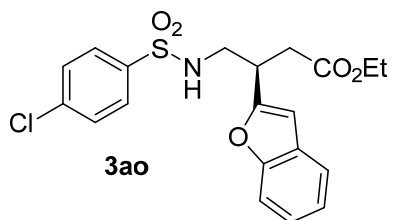

Compound **3ao** was obtained as a white solid following the general procedure (22.3 mg, 53% yield). ee = 95%,  $[\alpha]_D^{23} = +36.5$  ( $c = 0.44$ ,  $\text{CHCl}_3$ ), **HPLC**: Daicel CHIRALCEL AS-H column,  $\lambda = 254$  nm, Hexanes/IPA = 7:3, 1.0 mL/min,  $t_R(\text{major}) = 18.2$  min,  $t_R(\text{minor}) = 24.1$  min;  **$^1\text{H NMR}$**  (500 MHz,  $\text{CDCl}_3$ ):  $\delta$  7.70 (m, 2H), 7.47 (m, 1H), 7.39–7.33 (m, 3H), 7.27–7.19 (m, 2H), 6.45 (s, 1H), 4.86 (pseudo t,  $J = 6.6$  Hz, 1H), 4.11 (ABX<sub>3</sub>,  $J = 11.0, 7.1$  Hz, 2H), 3.57–3.50 (m, 1H), 3.41–3.31 (m, 2H), 2.75 (ABM,  $J = 15.9, 7.1$  Hz, 2H), 1.21 (t,  $J = 7.1$  Hz, 3H);  **$^{13}\text{C NMR}$**  (125 MHz,  $\text{CDCl}_3$ ):  $\delta$  171.4, 156.4, 154.8, 139.3, 138.5, 129.5, 128.5, 128.1, 124.3, 123.1, 121.0, 111.1, 104.2, 61.1, 45.5, 36.0, 35.5, 14.2; **HRMS** (ESI-TOF) Calculated for  $\text{C}_{20}\text{H}_{21}\text{ClNO}_5\text{S}$  ( $[\text{M}+\text{H}]^+$ ): 422.0823, found: 422.0832.

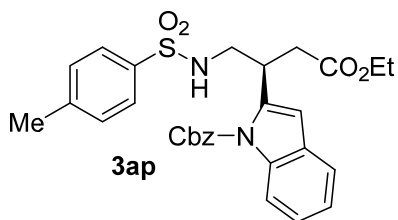

Compound **3ap** was obtained as a primrose solid following the general procedure (40.0 mg, 75% yield). ee = 87%,  $[\alpha]_D^{23} = -39.8$  ( $c = 0.80$ ,  $\text{CHCl}_3$ ), **HPLC**: Daicel CHIRALCEL AD-H column,  $\lambda = 254$  nm, Hexanes/IPA = 4:1, 1.0 mL/min,  $t_R(\text{minor}) = 24.3$  min,  $t_R(\text{major}) = 31.9$  min;  **$^1\text{H NMR}$**  (500 MHz,  $\text{CDCl}_3$ ):  $\delta$  8.15 (brs, 1H), 7.59 (d,  $J = 8.2$  Hz, 2H), 7.49 (m, 2H), 7.46–7.38 (m,

5H), 7.32 (pseudo t,  $J = 7.7$  Hz, 1H), 7.21–7.16 (m, 3H), 5.43 (AB,  $J = 12.1$  Hz, 2H), 4.60 (pseudo t,  $J = 6.6$  Hz, 1H), 4.11 (ABX<sub>3</sub>,  $J = 11.0, 7.2$  Hz, 2H), 3.59 (m, 1H), 3.34–3.25 (m, 2H), 2.75 (ABM,  $J = 16.0, 6.6$  Hz, 2H), 2.37 (s, 3H), 1.17 (t,  $J = 7.2$  Hz, 3H); <sup>13</sup>C NMR (125 MHz, CDCl<sub>3</sub>): δ 172.0, 150.7 (brs, this signal is weak due to the <sup>14</sup>N quadrupole relaxation effect of the neighboring N atom of the Cbz group), 143.5, 136.8, 135.8, 135.0, 129.7, 129.1, 128.95, 128.92, 128.8, 127.0, 125.2, 123.2, 122.7, 120.7, 119.1, 115.6, 69.0, 61.0, 46.4, 36.9, 33.0, 21.6, 14.2; **HRMS** (ESI-TOF) Calculated for C<sub>29</sub>H<sub>31</sub>N<sub>2</sub>O<sub>6</sub>S ([M+H]<sup>+</sup>): 535.1897, found: 535.1889.

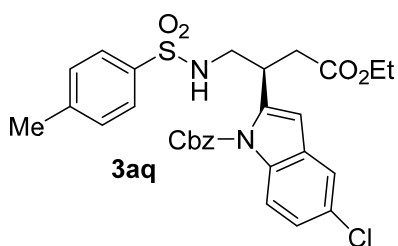

Compound **3aq** was obtained as a primrose solid following the general procedure (43.5 mg, 76% yield). ee = 90%,  $[\alpha]_D^{23} = -18.5$  ( $c = 0.86$ , CHCl<sub>3</sub>), **HPLC**: Daicel CHIRALCEL AD-H column,  $\lambda = 254$  nm, Hexanes/IPA = 4:1, 1.0 mL/min,  $t_R$ (minor) = 20.3 min,  $t_R$ (major) = 25.0 min; <sup>1</sup>H NMR (500 MHz, CDCl<sub>3</sub>): δ 8.05 (brs, 1H), 7.58 (d,  $J = 8.3$  Hz, 2H), 7.48 (m, 2H), 7.45–7.38 (m, 4H), 7.29 (m, 1H), 7.24 (m, 1H), 7.17 (d,  $J = 8.2$  Hz, 2H), 5.42 (AB,  $J = 12.1$  Hz, 2H), 4.71 (m, 1H), 4.07 (q,  $J = 7.2$  Hz, 2H), 3.51–3.46 (m, 1H), 3.26 (pseudo t,  $J = 6.6$  Hz, 2H), 2.71 (ABM,  $J = 16.0, 7.1$  Hz, 2H), 2.38 (s, 3H), 1.17 (t,  $J = 7.2$  Hz, 3H); <sup>13</sup>C NMR (125 MHz, CDCl<sub>3</sub>): δ 171.7, 150.3, 143.7, 136.7, 134.8, 134.1, 130.3, 129.8, 129.1, 129.0, 128.9, 128.87, 127.0, 125.3, 124.1, 120.1, 118.7, 116.6, 69.2, 61.0, 46.3, 36.9, 32.9, 21.6, 14.2; **HRMS** (ESI-TOF) Calculated for C<sub>29</sub>H<sub>30</sub>ClN<sub>2</sub>O<sub>6</sub>S ([M+H]<sup>+</sup>): 569.1508, found: 569.1516.

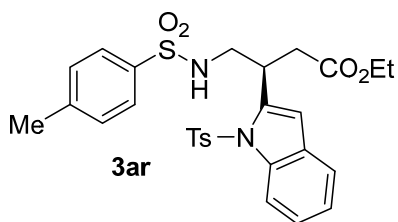

Compound **3ar** was obtained as a white solid following the general procedure (41.7 mg, 77% yield). ee = 81%,  $[\alpha]_D^{23} = +43.6$  ( $c = 0.81$ , CHCl<sub>3</sub>), **HPLC**: Daicel CHIRALCEL OD-H column,  $\lambda = 254$  nm, Hexanes/IPA = 86:14, 1.0 mL/min,  $t_R$ (minor) = 23.7 min,  $t_R$ (major) = 27.3 min; <sup>1</sup>H NMR (500 MHz, CDCl<sub>3</sub>): δ 7.94 (d,  $J = 8.2$  Hz, 1H), 7.73 (d,  $J = 8.2$  Hz, 2H), 7.56 (d,  $J = 8.3$  Hz, 2H), 7.37 (m, 2H), 7.30 (pseudo t,  $J = 7.1$  Hz, 1H), 7.23–7.15 (m, 5H), 4.62 (pseudo t,  $J = 6.6$  Hz, 1H), 4.11 (ABX<sub>3</sub>,  $J = 11.0, 7.2$  Hz, 2H), 3.58–3.52 (m, 1H), 3.30–3.19 (m, 2H), 2.73 (ABM,  $J = 16.0, 7.7$  Hz, 2H), 2.39 (s, 3H), 2.32 (s, 3H), 1.13 (t,  $J = 7.1$  Hz, 3H); <sup>13</sup>C NMR (125 MHz, CDCl<sub>3</sub>): δ 171.8, 145.2, 143.6, 136.8, 135.4, 135.1, 130.1, 129.8, 129.5, 127.0, 126.9, 125.2, 123.6, 123.4, 121.9, 119.5, 114.0, 60.9, 46.4, 37.0, 33.2, 21.7, 21.6, 14.1; **HRMS** (ESI-TOF) Calculated for C<sub>28</sub>H<sub>31</sub>N<sub>2</sub>O<sub>6</sub>S<sub>2</sub> ([M+H]<sup>+</sup>): 555.1618, found: 555.1625.

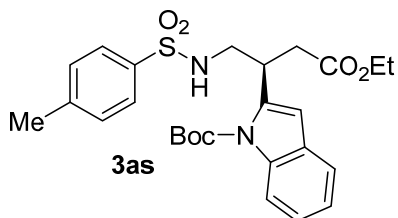

Compound **3as** was obtained as a primrose viscous oil following the general procedure (31.1 mg, 62% yield). ee = 68%,  $[\alpha]_D^{23} = +31.4$  ( $c = 0.60$ , CHCl<sub>3</sub>), **HPLC**: Daicel CHIRALCEL ID column,  $\lambda = 254$  nm, Hexanes/IPA = 86:14, 1.0 mL/min,  $t_R$ (minor) = 32.7 min,  $t_R$ (major) = 35.6 min; <sup>1</sup>H NMR (500 MHz, CDCl<sub>3</sub>): δ 8.12 (brs, 1H), 7.61 (d,  $J = 8.3$  Hz, 2H), 7.38 (m, 2H), 7.30 (m, 1H), 7.21–7.15 (m, 3H), 4.65 (m, 1H), 4.09 (q,  $J = 7.2$  Hz, 2H), 3.61–3.56 (m, 1H), 3.33–3.25 (m, 2H), 2.73 (ABM,  $J = 15.9, 7.7$  Hz, 2H), 2.39 (s, 3H), 1.67 (s, 9H), 1.20 (t,  $J = 7.2$  Hz, 3H); <sup>13</sup>C NMR (125 MHz, CDCl<sub>3</sub>): δ 172.0, 149.5, 143.5, 136.8, 135.7, 129.7, 129.0, 127.0, 124.9, 123.1, 122.7, 119.6, 119.0, 115.6, 84.1, 60.9, 46.4, 37.0, 33.0, 28.3, 21.6, 14.2; **HRMS** (ESI-TOF) Calculated for

C<sub>26</sub>H<sub>33</sub>N<sub>2</sub>O<sub>6</sub>S ([M+H]<sup>+</sup>): 501.2054, found: 501.2045.

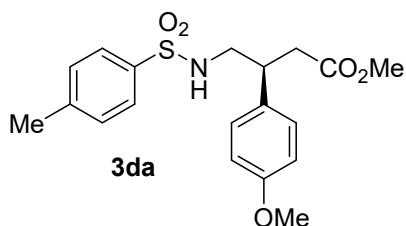

Compound **3da** was obtained as a white solid following the general procedure (15.1 mg, 40% yield). ee = 80%, [ $\alpha$ ]<sub>D</sub><sup>23</sup> = -91.6 (*c* = 0.26, CHCl<sub>3</sub>), **HPLC**: Daicel CHIRALCEL ID column,  $\lambda$  = 254 nm, Hexanes/IPA = 7:3, 1.0 mL/min, *t*<sub>R</sub>(minor) = 18.2 min, *t*<sub>R</sub>(major) = 19.6 min; **<sup>1</sup>H NMR** (500 MHz, CDCl<sub>3</sub>):  $\delta$  7.65 (d, *J* = 8.2 Hz, 2H), 7.27 (d, *J* = 8.2 Hz, 2H), 6.98 (d, *J* = 8.8 Hz, 2H), 6.80 (d, *J* = 8.8 Hz, 2H), 4.45 (m, 1H), 3.77 (s, 3H), 3.59 (s, 3H), 3.26–3.18 (m, 2H), 3.07–2.99 (m, 1H), 2.61 (ABM, *J* = 16.0, 7.2 Hz, 2H), 2.42 (s, 3H); **<sup>13</sup>C NMR** (125 MHz, CDCl<sub>3</sub>):  $\delta$  172.4, 159.0, 143.6, 136.9, 132.1, 129.8, 128.6, 127.2, 114.5, 55.4, 51.9, 48.1, 40.8, 38.2, 21.6; **HRMS** (ESI-TOF) Calculated for C<sub>19</sub>H<sub>24</sub>NO<sub>5</sub>S ([M+H]<sup>+</sup>): 378.1370, found: 378.1367.

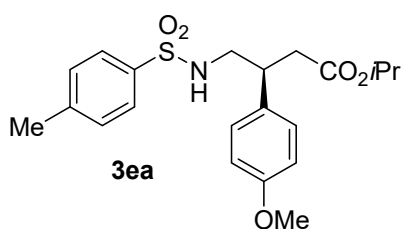

Compound **3ea** was obtained as a white solid following the general procedure (21.9 mg, 54% yield). ee = 88%, [ $\alpha$ ]<sub>D</sub><sup>23</sup> = +5.0 (*c* = 0.32, EtOH), **HPLC**: Daicel CHIRALCEL IC column,  $\lambda$  = 254 nm, Hexanes/IPA = 4:1, 1.0 mL/min, *t*<sub>R</sub>(minor) = 34.0 min, *t*<sub>R</sub>(major) = 36.0 min; **<sup>1</sup>H NMR** (500 MHz, CDCl<sub>3</sub>):  $\delta$  7.65 (d, *J* = 8.3 Hz, 2H), 7.27 (d, *J* = 8.1 Hz, 2H), 6.98 (d, *J* = 8.8 Hz, 2H), 6.79 (d, *J* = 8.8 Hz, 2H), 4.90 (m, 1H), 4.39 (dd, *J* = 7.2, 4.9 Hz, 1H), 3.77 (s, 3H), 3.26–3.15 (m, 2H), 3.05–3.00 (m, 1H), 2.56 (ABM, *J* = 15.4, 7.1 Hz, 2H), 2.42 (s, 3H), 1.14 (d, *J* = 6.1 Hz, 3H), 1.10 (d, *J* = 6.7 Hz, 3H); **<sup>13</sup>C NMR** (125 MHz, CDCl<sub>3</sub>):  $\delta$  171.4, 159.0, 143.6, 137.0, 132.1, 129.8, 128.7, 127.2, 114.4, 68.2, 55.4, 48.2, 41.0, 38.9, 21.8, 21.79, 21.6; **HRMS** (ESI-TOF) Calculated for C<sub>21</sub>H<sub>28</sub>NO<sub>5</sub>S ([M+H]<sup>+</sup>): 406.1683, found: 406.1686.

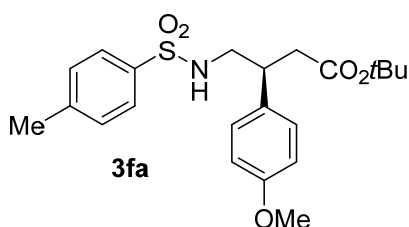

Compound **3fa** was obtained as a white solid following the general procedure (7.0 mg, 16% yield). ee = 78%, [ $\alpha$ ]<sub>D</sub><sup>23</sup> = -252.7 (*c* = 0.10, CHCl<sub>3</sub>), **HPLC**: Daicel CHIRALCEL ID column,  $\lambda$  = 254 nm, Hexanes/IPA = 7:3, 1.0 mL/min, *t*<sub>R</sub>(minor) = 12.5 min, *t*<sub>R</sub>(major) = 13.8 min; **<sup>1</sup>H NMR** (500 MHz, CDCl<sub>3</sub>):  $\delta$  7.65 (d, *J* = 8.2 Hz, 2H), 7.27 (d, *J* = 8.3 Hz, 2H), 6.98 (d, *J* = 8.8 Hz, 2H), 6.80 (d, *J* = 8.8 Hz, 2H), 4.36 (dd, *J* = 7.7, 5.0 Hz, 1H), 3.78 (s, 3H), 3.25–3.19 (m, 1H), 3.17–3.11 (m, 1H), 3.03–2.98 (m, 1H), 2.51 (ABM, *J* = 15.4, 7.1 Hz, 2H), 2.42 (s, 3H), 1.32 (s, 9H); **<sup>13</sup>C NMR** (125 MHz, CDCl<sub>3</sub>):  $\delta$  171.2, 158.9, 143.5, 137.0, 132.3, 129.8, 128.7, 127.2, 114.4, 81.0, 55.4, 48.2, 41.1, 39.8, 28.1, 21.7; **HRMS** (ESI-TOF) Calculated for C<sub>22</sub>H<sub>30</sub>NO<sub>5</sub>S ([M+H]<sup>+</sup>): 420.1839, found: 420.1847.

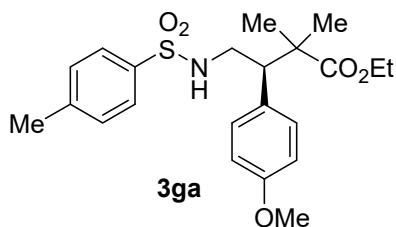

Compound **3ga** was obtained as a primrose solid following the general procedure (14.2 mg, 34% yield). ee = 94%, [ $\alpha$ ]<sub>D</sub><sup>23</sup> = -53.3 (*c* = 0.25, CHCl<sub>3</sub>), **HPLC**: Daicel CHIRALCEL AD-H column,  $\lambda$  = 254 nm, Hexanes/IPA = 4:1, 1.0 mL/min, *t*<sub>R</sub>(minor) = 11.8 min, *t*<sub>R</sub>(major) = 16.0 min; **<sup>1</sup>H NMR** (500 MHz, CDCl<sub>3</sub>):  $\delta$  7.62 (d, *J* = 7.7 Hz, 2H), 7.29 (d, *J* = 8.3 Hz, 2H), 6.82 (AB, *J* = 8.8 Hz, 4H), 4.07 (brs, 1H), 4.06 (q, *J* = 7.2 Hz, 2H), 3.79 (s, 3H), 3.37–3.32 (m, 1H), 3.19 (m, 1H), 3.00 (dd, *J* = 11.5, 4.5 Hz, 1H), 2.44 (s, 3H), 1.20 (t, *J* = 7.2 Hz, 3H), 1.04 (s, 3H), 0.99 (s, 3H); **<sup>13</sup>C NMR**

(125 MHz, CDCl<sub>3</sub>):  $\delta$  171.2, 158.9, 143.5, 137.0, 132.3, 129.8, 128.7, 127.2, 114.4, 81.0, 55.4, 48.2, 41.1, 39.8, 28.1, 21.7; **HRMS** (ESI-TOF) Calculated for C<sub>22</sub>H<sub>30</sub>NO<sub>5</sub>S ([M+H]<sup>+</sup>): 420.1839, found: 420.1830.

### Procedure for the transformation of (*R/S*)-**3ak** to (*R/S*)-rolipram

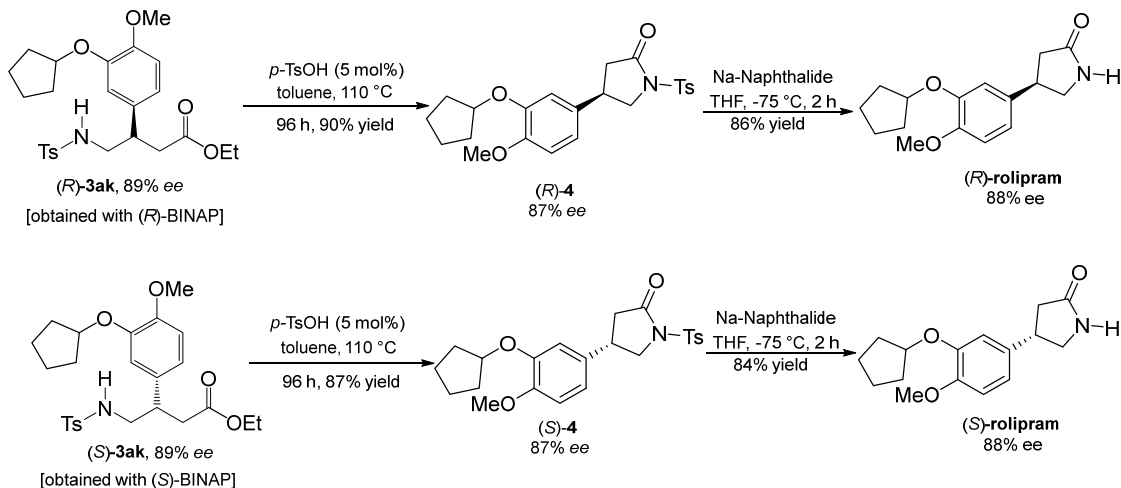

Under argon atmosphere, to a stirred solution of the (*S*)-**3ak** (47.6 mg, 0.1 mmol, 89% ee) in dry toluene (4.0 mL) was added *p*-tolylsulfonic acid (0.9 mg, 0.005 mmol, 5 mol%), and the resulting reaction mixture was refluxed for 96 h. After being cooled down to room temperature, the reaction mixture was quenched by dropwise addition of saturated aqueous NaHCO<sub>3</sub> solution (4.0 mL), extracted with EtOAc (10 mL x 3). The combined organic extracts were dried over anhydrous Na<sub>2</sub>SO<sub>4</sub> and concentrated in vacuo by rotary evaporation. The residue was purified by flash chromatography on silica gel (eluting with EtOAc/petroleum ether (v/v) = 1:4) to afford the product (*S*)-**4** as a white solid in 87% yield (37.4 mg).

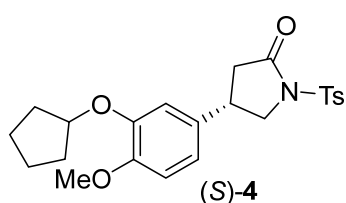

Ee = 87%,  $[\alpha]_D^{23} = +38.2$  ( $c = 0.11$ , CHCl<sub>3</sub>), **HPLC**: Daicel CHIRALCEL AD-H column,  $\lambda = 254$  nm, Hexanes/IPA = 4:1, 1.0 mL/min,  $t_R$ (major) = 13.4 min,  $t_R$ (minor) = 15.7 min; **<sup>1</sup>H NMR** (500 MHz, CDCl<sub>3</sub>):  $\delta$  7.92 (d,  $J = 8.2$  Hz, 2H), 7.33 (d,  $J = 8.2$  Hz, 2H), 6.77 (m, 1H), 6.65 (m, 2H), 4.68 (m, 1H), 4.28 (dd,  $J = 9.9, 8.2$  Hz, 1H), 3.81 (s, 3H), 3.75 (dd,  $J = 9.9, 7.7$  Hz, 1H), 3.55–3.49 (m, 1H), 2.80 (dd,  $J = 17.0, 8.2$  Hz, 1H), 2.57 (dd,  $J = 17.1, 8.8$  Hz, 1H), 2.44 (s, 3H), 1.92–1.77 (m, 6H), 1.59 (m, 2H); **<sup>13</sup>C NMR** (125 MHz, CDCl<sub>3</sub>):  $\delta$  172.4, 149.6, 148.1, 145.3, 135.2, 132.4, 129.8, 128.2, 118.6, 113.4, 112.2, 80.6, 56.2, 54.0, 39.8, 36.8, 32.9, 24.1, 21.8; **HRMS** (ESI-TOF) Calculated for C<sub>23</sub>H<sub>27</sub>NO<sub>5</sub>S ([M+H]<sup>+</sup>): 430.1683, found: 430.1691.

The compound (*R*)-**4** was prepared by following the same procedure from (*R*)-**3ak**. White solid (38.6 mg, 90% yield), ee = 87%,  $[\alpha]_D^{23} = -44.4$  ( $c = 0.59$ , CHCl<sub>3</sub>), **HPLC**: Daicel CHIRALCEL AD-H column,  $\lambda = 254$  nm, Hexanes/IPA = 4:1, 1.0 mL/min,  $t_R$ (minor) = 13.1 min,  $t_R$ (major) = 15.2 min. The spectral data agree with those of (*S*)-**4**.

Under argon atmosphere, to a stirred solution of naphthalene (80.0 mg, 0.624 mmol) in 1.0 mL of dried THF was added freshly cut sodium turnings (11.5 mg, 0.5 mmol) and the resulting mixture was stirred at rt for 2 h to give a deep green solution. Then a solution of (*S*)-**4** (43.0 mg, 0.1 mmol, 87% ee) in dried THF (1.0 mL) was added dropwise to the above solution at -78 °C, and the resulting reaction mixture was stirred at -78 °C for 0.5 h before being allowed to warm to rt for another 1.5 h of stirring. Then the reaction mixture was quenched by dropwise addition of saturated aqueous NH<sub>4</sub>Cl solution (2.0 mL), diluted with 10.0 mL of deionized water, and extracted with EtOAc (10 mL x 3). The combined organic extracts were dried over anhydrous Na<sub>2</sub>SO<sub>4</sub> and concentrated in vacuo by rotary evaporation. The residue was purified by flash chromatography on silica gel (eluting with EtOAc/petroleum ether (v/v) = 2:1) to afford the product (*S*)-rolipram as a white solid in 84% yield (23.1 mg).

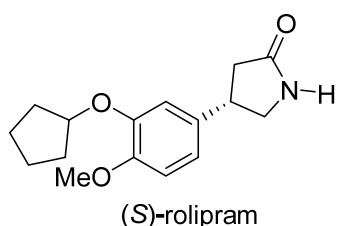

Ee = 88%,  $[\alpha]_D^{23} = +28.3$  ( $c = 0.49$ , MeOH) {lit.<sup>4</sup>  $[\alpha]_D^{25} = +26.2$  ( $c = 0.60$ , MeOH) for 98% ee (*S*)}, **HPLC**: Daicel CHIRALCEL ID column,  $\lambda = 254$  nm, Hexanes/IPA = 86:14, 1.0 mL/min,  $t_R(\text{minor}) = 13.6$  min,  $t_R(\text{major}) = 14.4$  min. The spectral data are in good agreement with those of literature report.<sup>4</sup>

The compound (*R*)-rolipram was prepared by following the same procedure from (*R*)-**4**. White solid (23.6 mg, 86% yield), ee = 88%,  $[\alpha]_D^{23} = -34.9$  ( $c = 0.69$ , MeOH), **HPLC**: Daicel CHIRALCEL ID column,  $\lambda = 254$  nm, Hexanes/IPA = 86:14, 1.0 mL/min,  $t_R(\text{major}) = 13.1$  min,  $t_R(\text{minor}) = 15.0$  min.

## References

1. D. D. Perrin and W. L. F. Armarego, *Purification of Laboratory Chemicals*; 3<sup>rd</sup> ed., Pergamon Press, Oxford, 1988.
2. A. G. Wenzel and E. N. Jacobsen, Asymmetric Catalytic Mannich Reactions Catalyzed by Urea Derivatives: Enantioselective Synthesis of  $\beta$ -Aryl- $\beta$ -Amino Acids, *J. Am. Chem. Soc.*, 2002, **124**, 12964–12965.
3. **2a**: (a) D. A. Evans, M. M. Faul and M. T. Bilodeau, Development of the Copper-Catalyzed Olefin Aziridination Reaction, *J. Am. Chem. Soc.*, 1994, **116**, 2742–2732; (b) **2b**, **2c**, **2e**, **2f**, **2h**, **2j**, **2n**, **2o**, **2p** and **2q**: P.-J. Yang, L. Qi, Z. Liu, G. Yang and Z. Chai, Lewis Acid-Catalyzed Dynamic Kinetic Asymmetric Transformation of Racemic *N*-Sulfonylaziridines, *J. Am. Chem. Soc.*, 2018, **140**, 17211–17217.
4. C. Palomo, A. Landa, A. Mielgo, M. Oiarbide, Á. Puente and S. Vera, Water-Compatible Iminium Activation: Organocatalytic Michael Reactions of Carbon-Centered Nucleophiles with Enals, *Angew. Chem., Int. Ed.*, 2007, **46**, 8431–8435.

## Copies of HPLC Traces

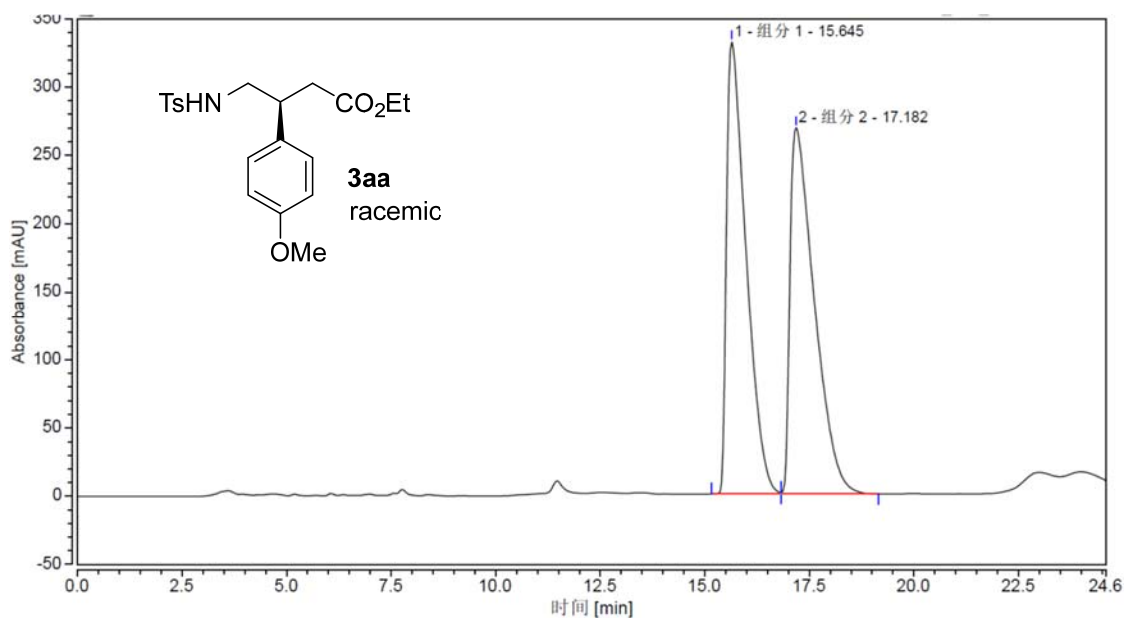

| Area Percent Report |               |                 |              |       |         |
|---------------------|---------------|-----------------|--------------|-------|---------|
| Peak #              | RetTime [min] | Area [mAU *min] | Height [mAU] | Area% | Height% |
| 1                   | 15.645        | 179.079         | 331.712      | 49.75 | 55.24   |
| 2                   | 17.182        | 180.858         | 268.792      | 50.25 | 44.76   |

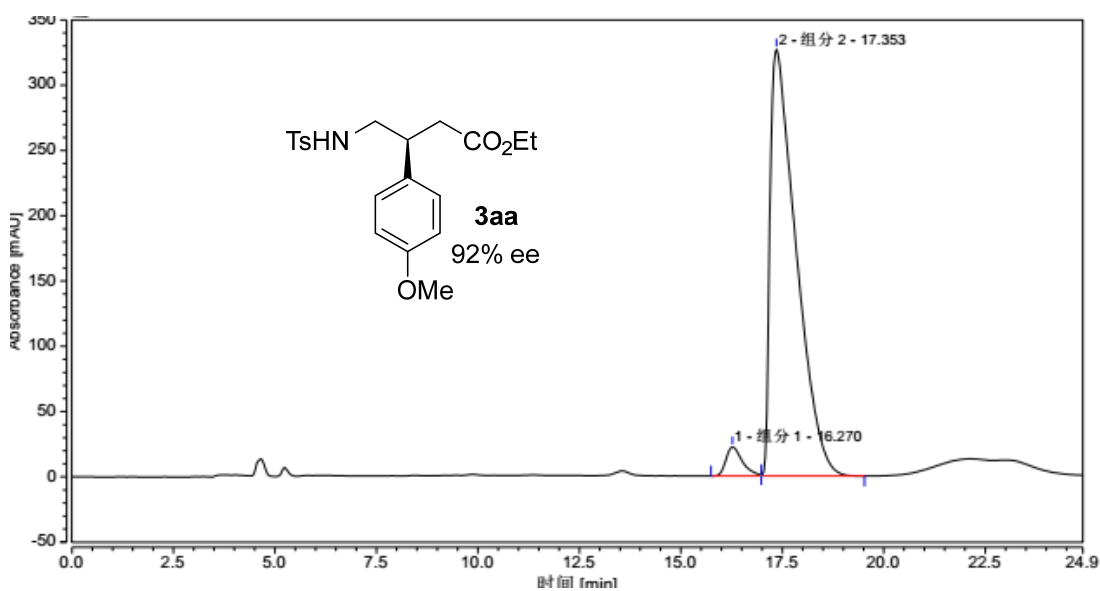

| Area Percent Report |               |                 |              |       |         |
|---------------------|---------------|-----------------|--------------|-------|---------|
| Peak #              | RetTime [min] | Area [mAU *min] | Height [mAU] | Area% | Height% |
| 1                   | 16.270        | 10.463          | 22.316       | 4.13  | 6.39    |
| 2                   | 17.353        | 242.978         | 326.936      | 95.87 | 93.61   |

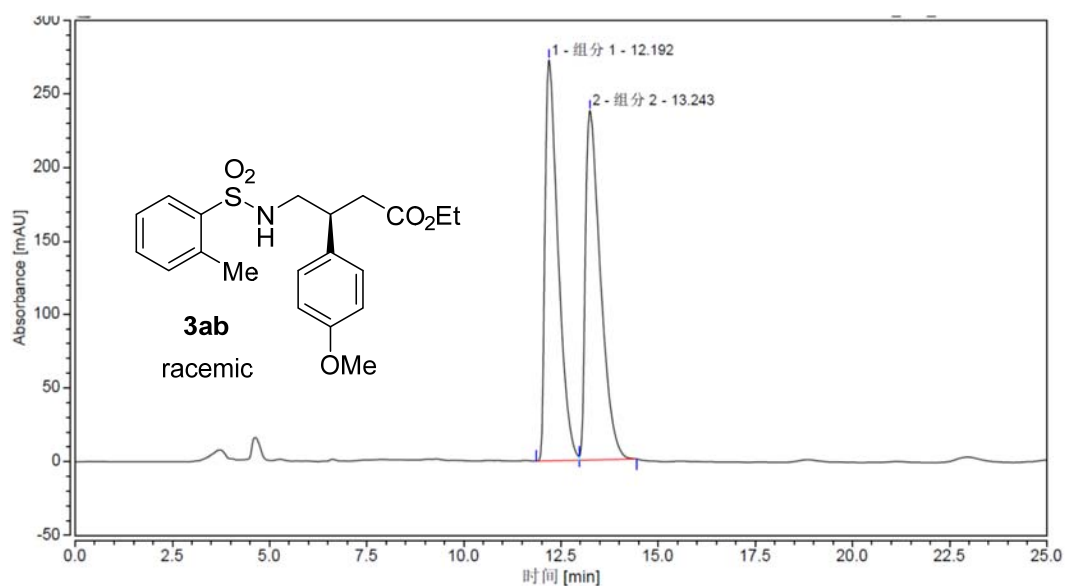

Area Percent Report

| Peak # | RetTime [min] | Area [mAU *min] | Height [mAU] | Area% | Height% |
|--------|---------------|-----------------|--------------|-------|---------|
| 1      | 12.192        | 106.480         | 272.315      | 49.44 | 53.33   |
| 2      | 13.243        | 108.879         | 238.303      | 50.56 | 46.67   |

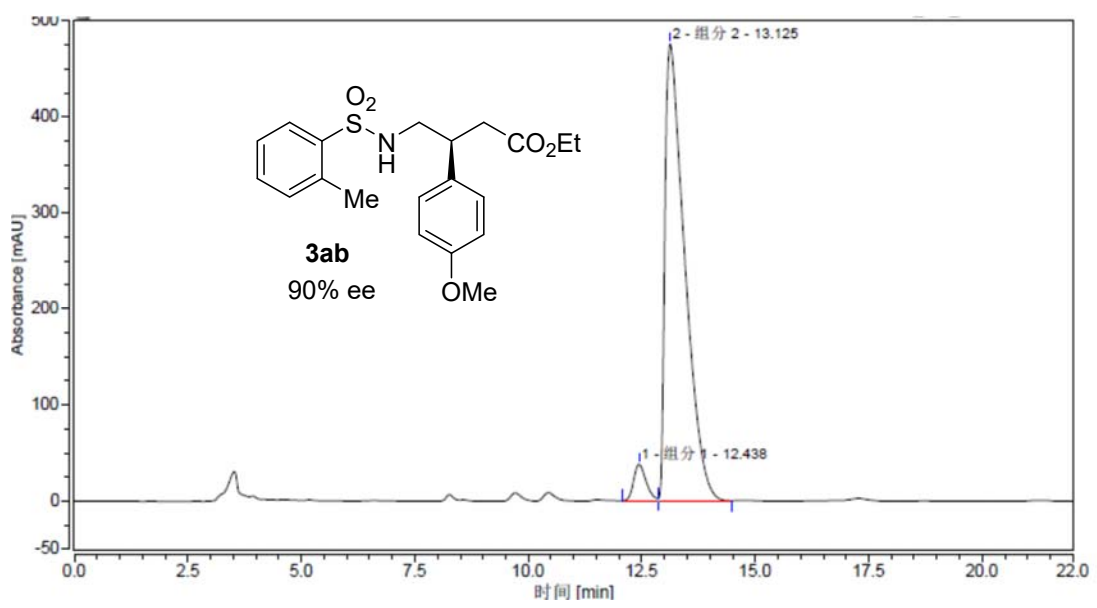

Area Percent Report

| Peak # | RetTime [min] | Area [mAU *min] | Height [mAU] | Area% | Height% |
|--------|---------------|-----------------|--------------|-------|---------|
| 1      | 12.438        | 12.167          | 38.247       | 4.82  | 7.44    |
| 2      | 13.125        | 240.077         | 475.518      | 95.18 | 92.56   |

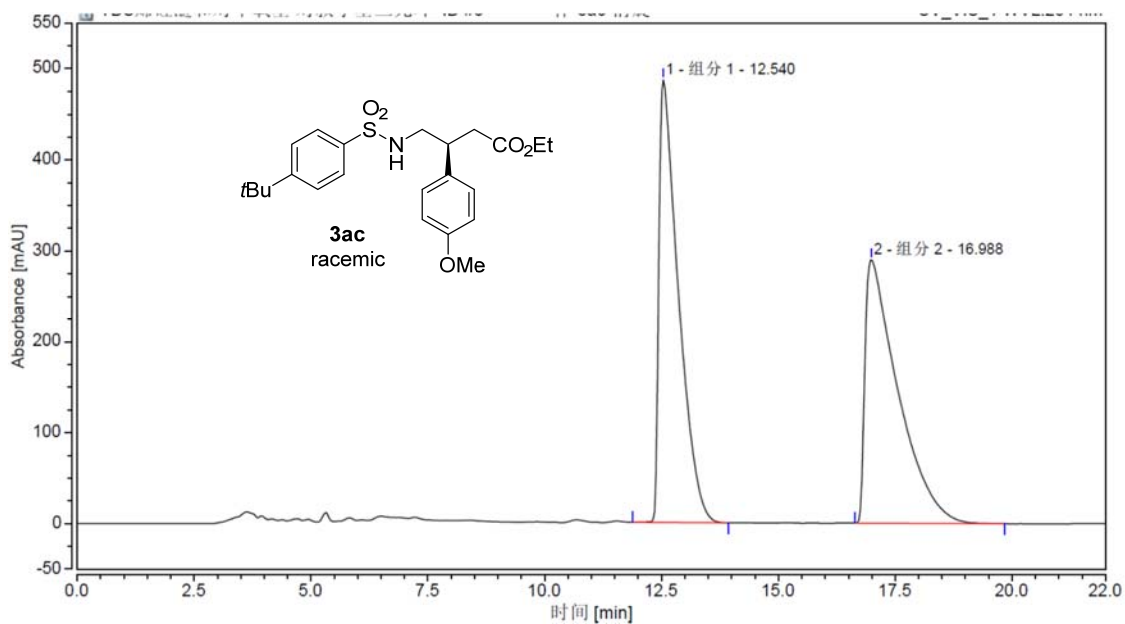

| Area Percent Report |               |                 |              |       |         |
|---------------------|---------------|-----------------|--------------|-------|---------|
| Peak #              | RetTime [min] | Area [mAU *min] | Height [mAU] | Area% | Height% |
| 1                   | 12.540        | 235.474         | 486.570      | 49.92 | 62.65   |
| 2                   | 16.988        | 236.271         | 290.114      | 50.08 | 37.35   |

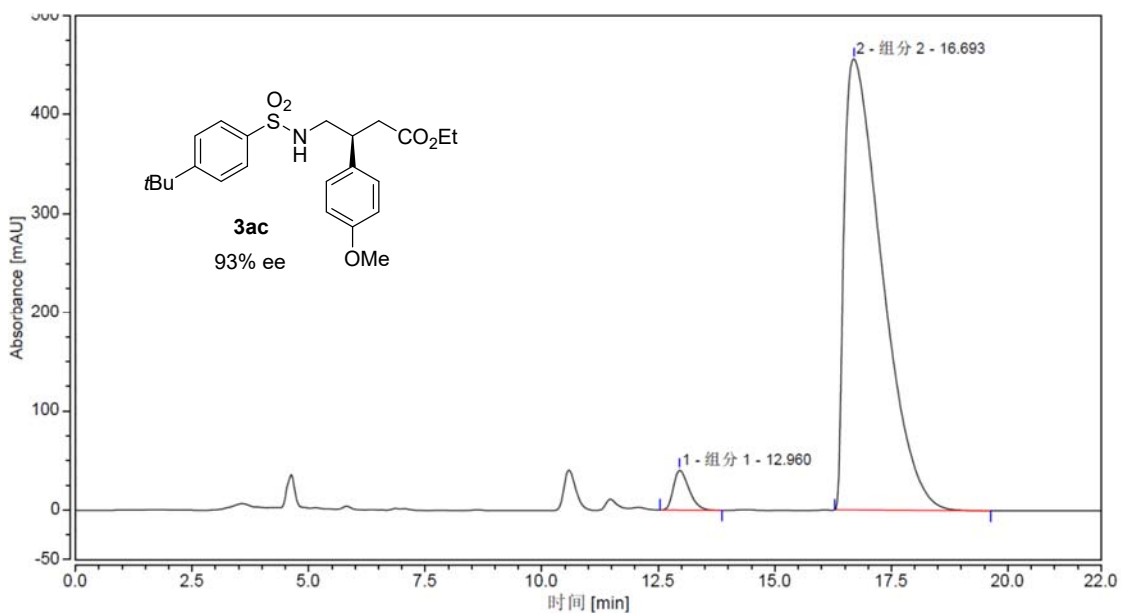

| Area Percent Report |               |                 |              |       |         |
|---------------------|---------------|-----------------|--------------|-------|---------|
| Peak #              | RetTime [min] | Area [mAU *min] | Height [mAU] | Area% | Height% |
| 1                   | 12.960        | 15.628          | 40.268       | 3.52  | 8.11    |
| 2                   | 16.693        | 427.791         | 456.085      | 96.48 | 91.89   |



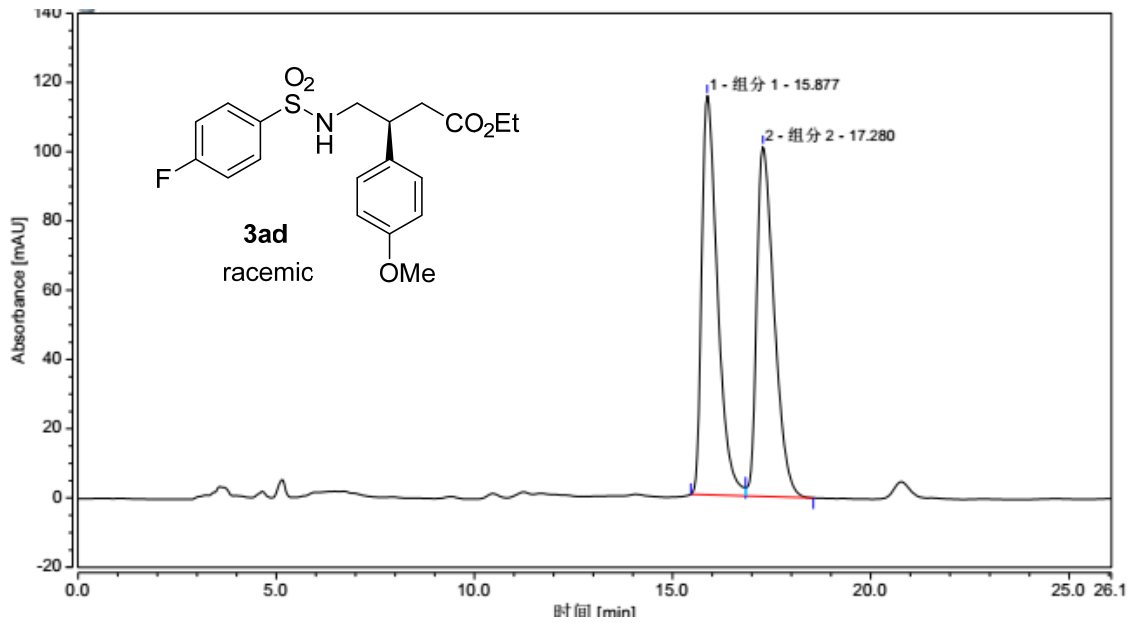

| Area Percent Report |               |                 |              |       |         |
|---------------------|---------------|-----------------|--------------|-------|---------|
| Peak #              | RetTime [min] | Area [mAU *min] | Height [mAU] | Area% | Height% |
| 1                   | 15.877        | 53.207          | 115.268      | 50.80 | 53.29   |
| 2                   | 17.280        | 51.526          | 101.054      | 49.20 | 46.71   |

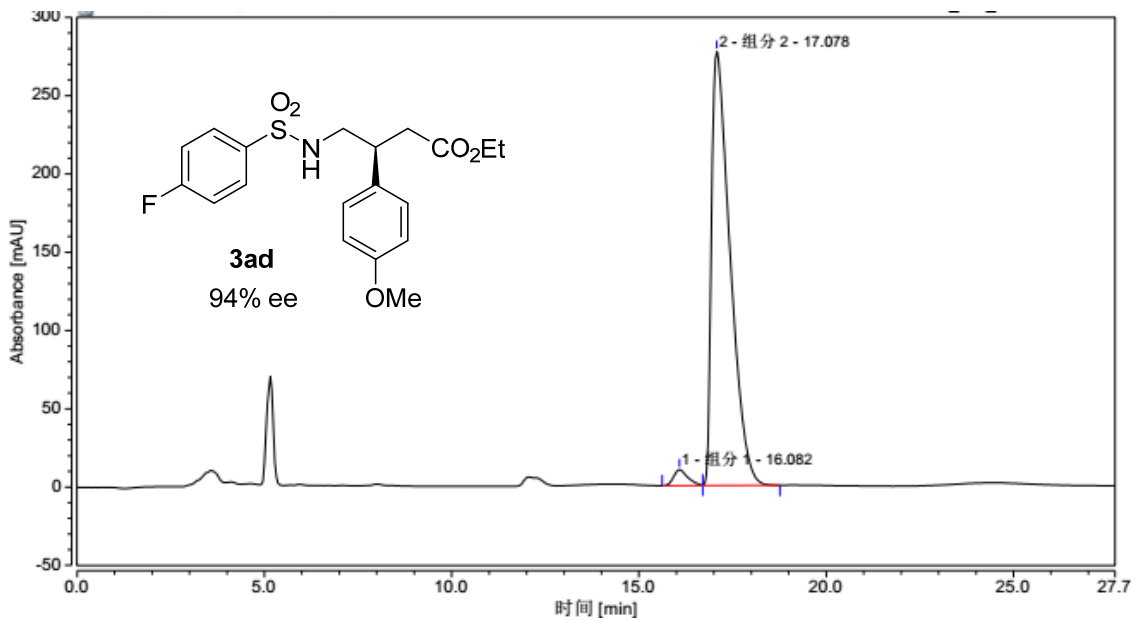

| Area Percent Report |               |                 |              |       |         |
|---------------------|---------------|-----------------|--------------|-------|---------|
| Peak #              | RetTime [min] | Area [mAU *min] | Height [mAU] | Area% | Height% |
| 1                   | 16.082        | 4.490           | 10.213       | 2.73  | 3.55    |
| 2                   | 17.078        | 159.723         | 277.320      | 97.27 | 96.45   |

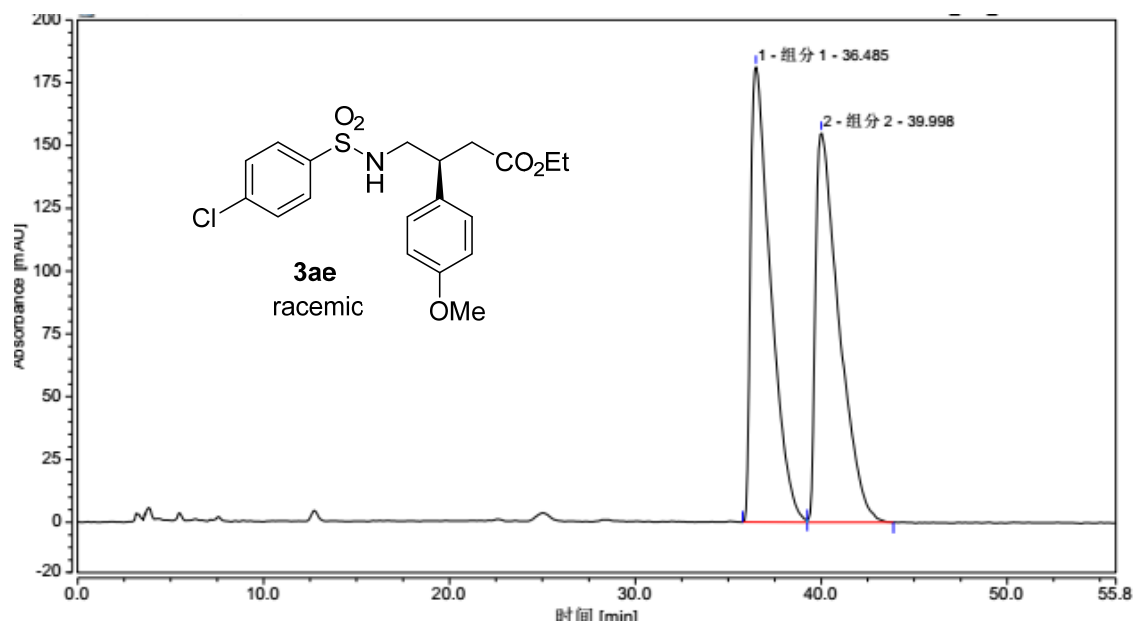

| Area Percent Report |               |                 |              |       |         |
|---------------------|---------------|-----------------|--------------|-------|---------|
| Peak #              | RetTime [min] | Area [mAU *min] | Height [mAU] | Area% | Height% |
| 1                   | 36.485        | 226.735         | 181.403      | 49.94 | 53.90   |
| 2                   | 39.998        | 227.263         | 155.155      | 50.06 | 46.10   |

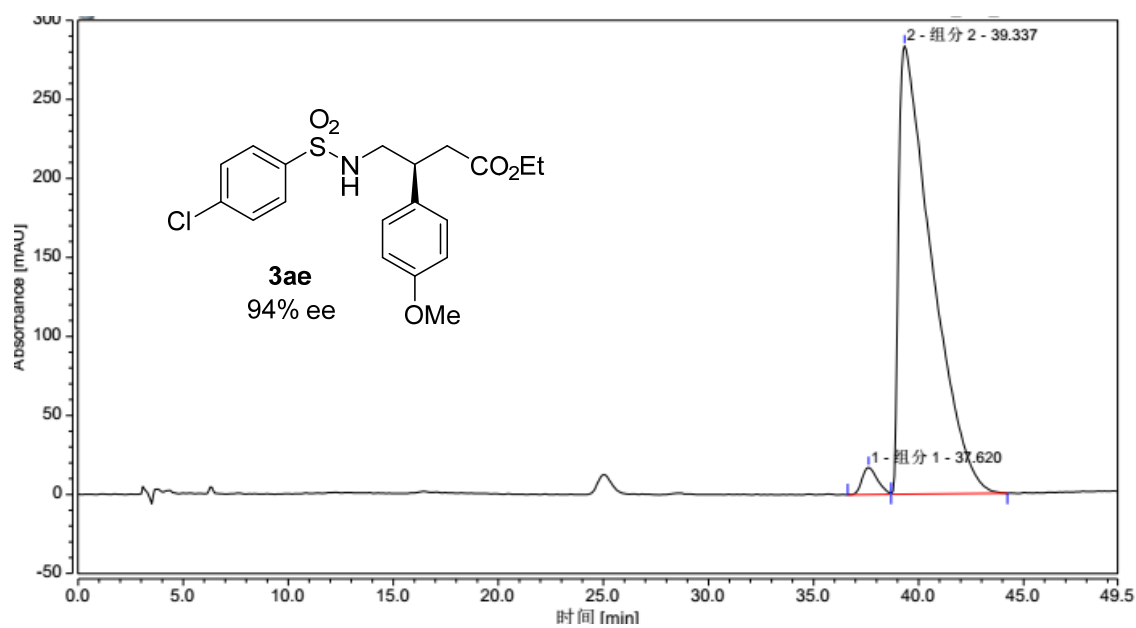

| Area Percent Report |               |                 |              |       |         |
|---------------------|---------------|-----------------|--------------|-------|---------|
| Peak #              | RetTime [min] | Area [mAU *min] | Height [mAU] | Area% | Height% |
| 1                   | 37.620        | 14.546          | 17.081       | 2.74  | 5.68    |
| 2                   | 39.337        | 516.919         | 283.593      | 97.26 | 94.32   |

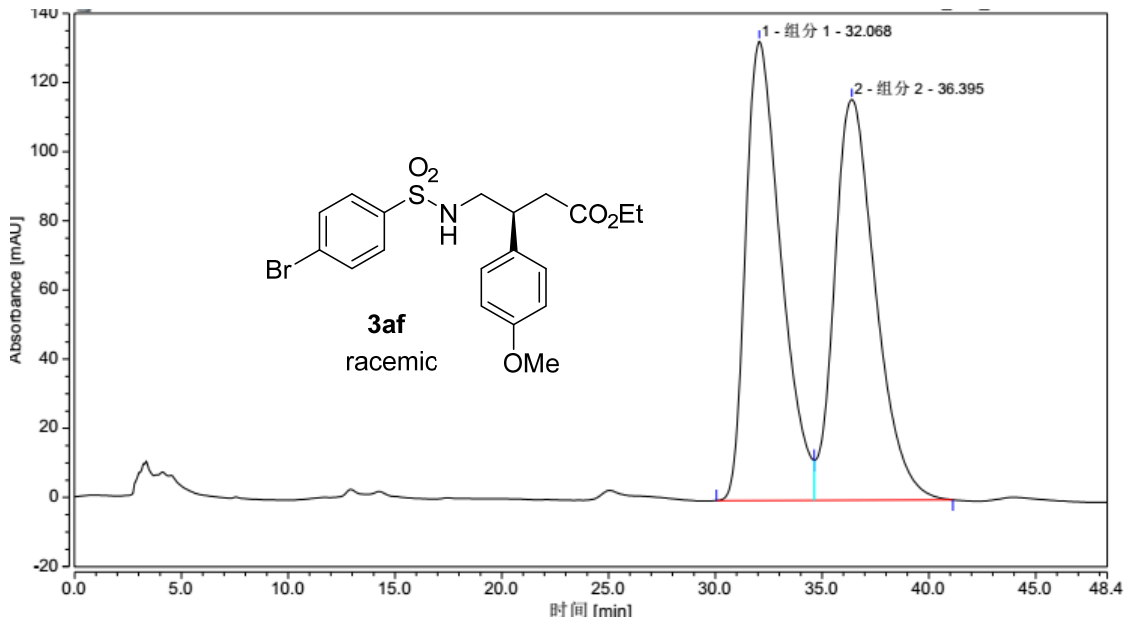

| Area Percent Report |               |                 |              |       |         |
|---------------------|---------------|-----------------|--------------|-------|---------|
| Peak #              | RetTime [min] | Area [mAU *min] | Height [mAU] | Area% | Height% |
| 1                   | 32.068        | 254.036         | 132.814      | 49.49 | 53.41   |
| 2                   | 36.395        | 259.322         | 115.865      | 50.51 | 46.59   |

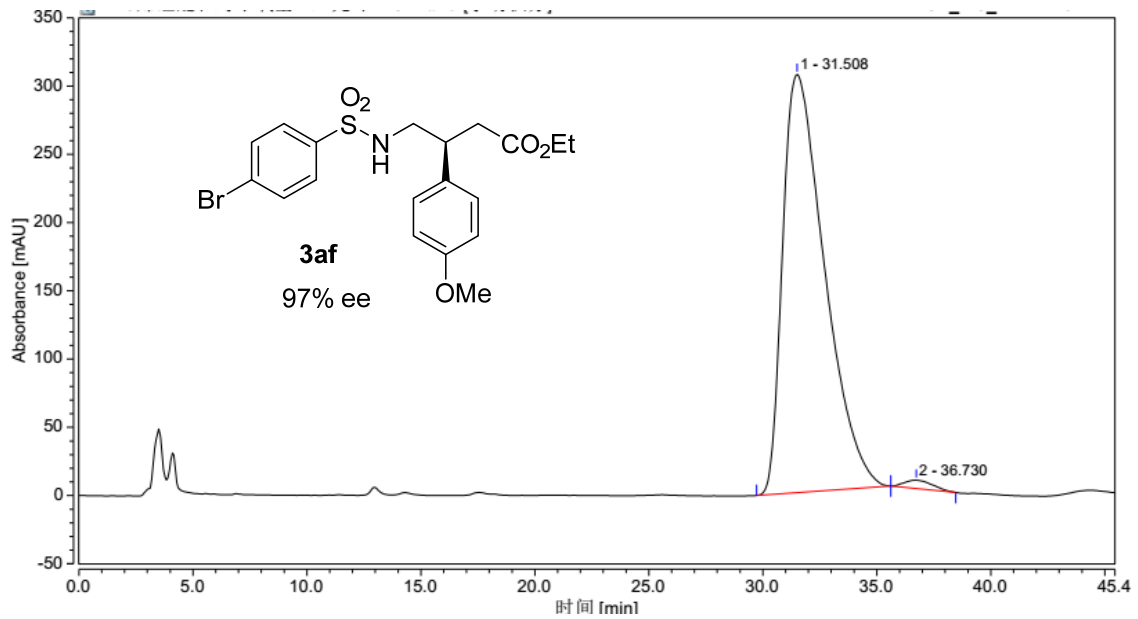

| Area Percent Report |               |                 |              |       |         |
|---------------------|---------------|-----------------|--------------|-------|---------|
| Peak #              | RetTime [min] | Area [mAU *min] | Height [mAU] | Area% | Height% |
| 1                   | 31.508        | 652.744         | 306.448      | 98.66 | 98.05   |
| 2                   | 36.730        | 8.834           | 6.087        | 1.34  | 1.95    |

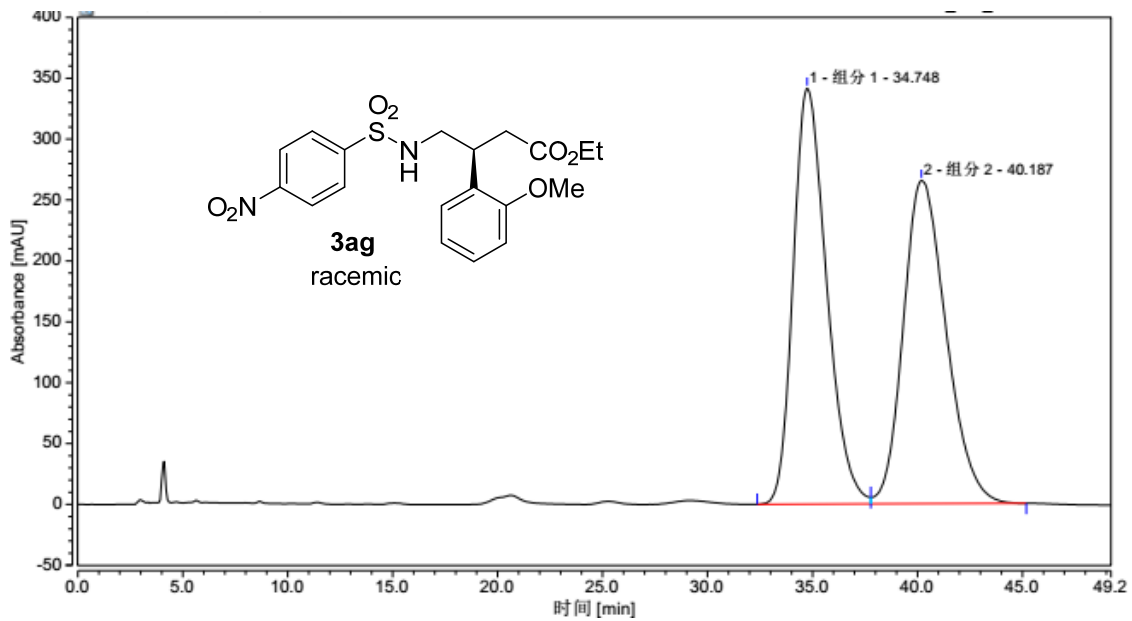

| Area Percent Report |               |                 |              |       |         |
|---------------------|---------------|-----------------|--------------|-------|---------|
| Peak #              | RetTime [min] | Area [mAU *min] | Height [mAU] | Area% | Height% |
| 1                   | 34.748        | 628.768         | 341.583      | 50.03 | 56.28   |
| 2                   | 40.187        | 627.892         | 265.312      | 49.97 | 43.72   |

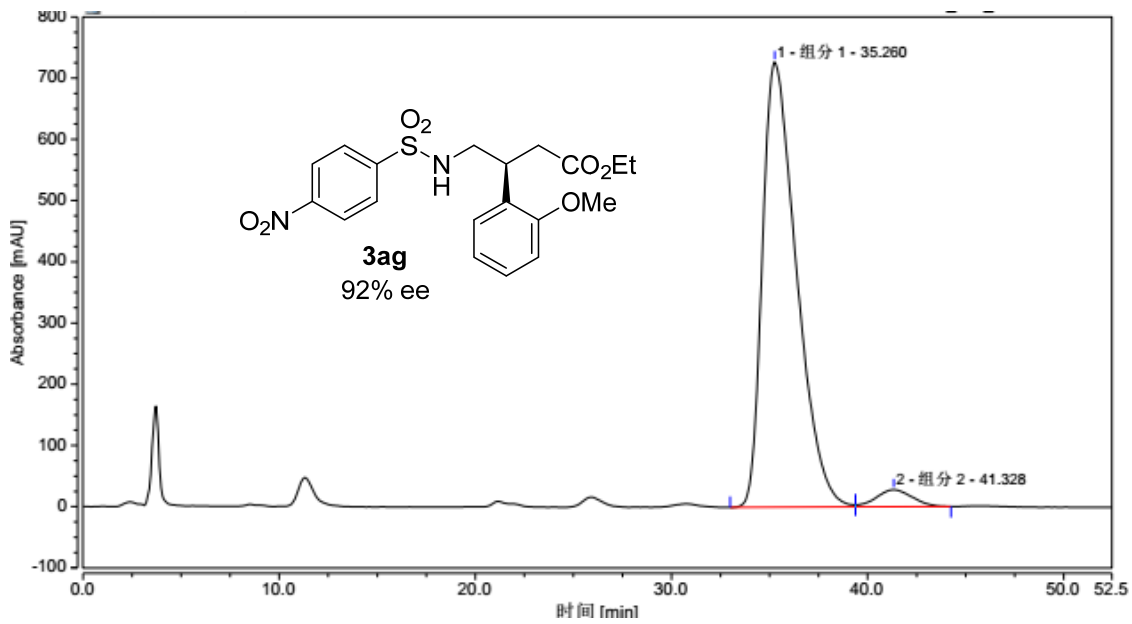

| Area Percent Report |               |                 |              |       |         |
|---------------------|---------------|-----------------|--------------|-------|---------|
| Peak #              | RetTime [min] | Area [mAU *min] | Height [mAU] | Area% | Height% |
| 1                   | 35.260        | 1463.022        | 727.369      | 96.11 | 96.32   |
| 2                   | 41.328        | 59.269          | 27.795       | 3.89  | 3.68    |

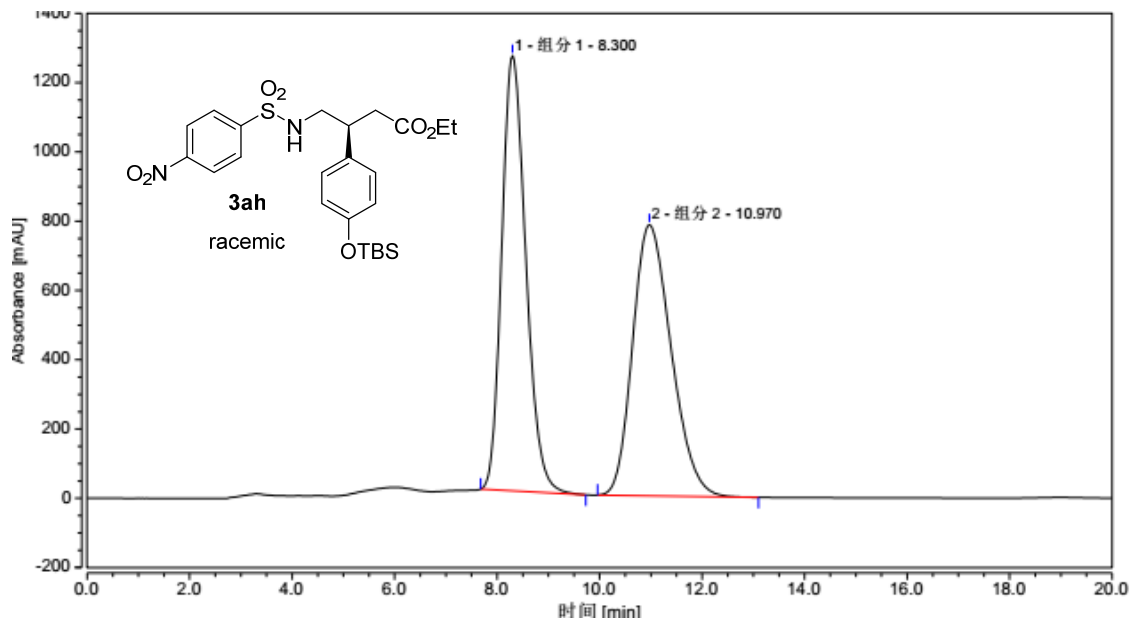

| Area Percent Report |               |                 |              |       |         |
|---------------------|---------------|-----------------|--------------|-------|---------|
| Peak #              | RetTime [min] | Area [mAU *min] | Height [mAU] | Area% | Height% |
| 1                   | 8.300         | 683.592         | 1256.698     | 50.06 | 61.63   |
| 2                   | 10.970        | 681.887         | 782.281      | 49.94 | 38.37   |

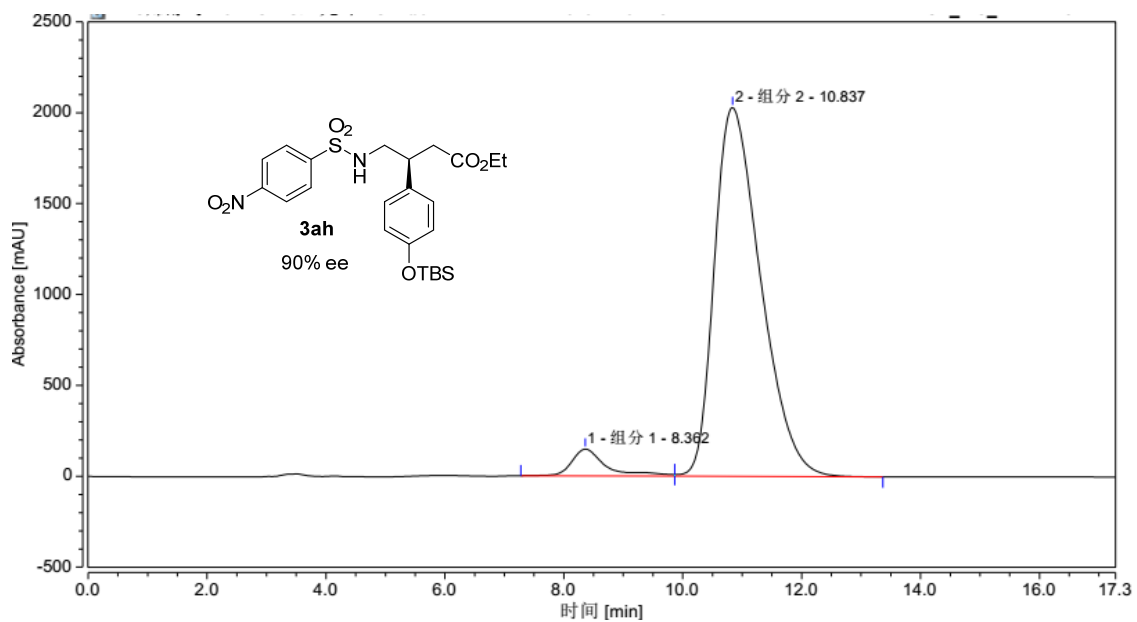

| Area Percent Report |               |                 |              |       |         |
|---------------------|---------------|-----------------|--------------|-------|---------|
| Peak #              | RetTime [min] | Area [mAU *min] | Height [mAU] | Area% | Height% |
| 1                   | 8.362         | 99.037          | 147.490      | 5.13  | 6.78    |
| 2                   | 10.837        | 1829.986        | 2029.306     | 94.87 | 93.22   |

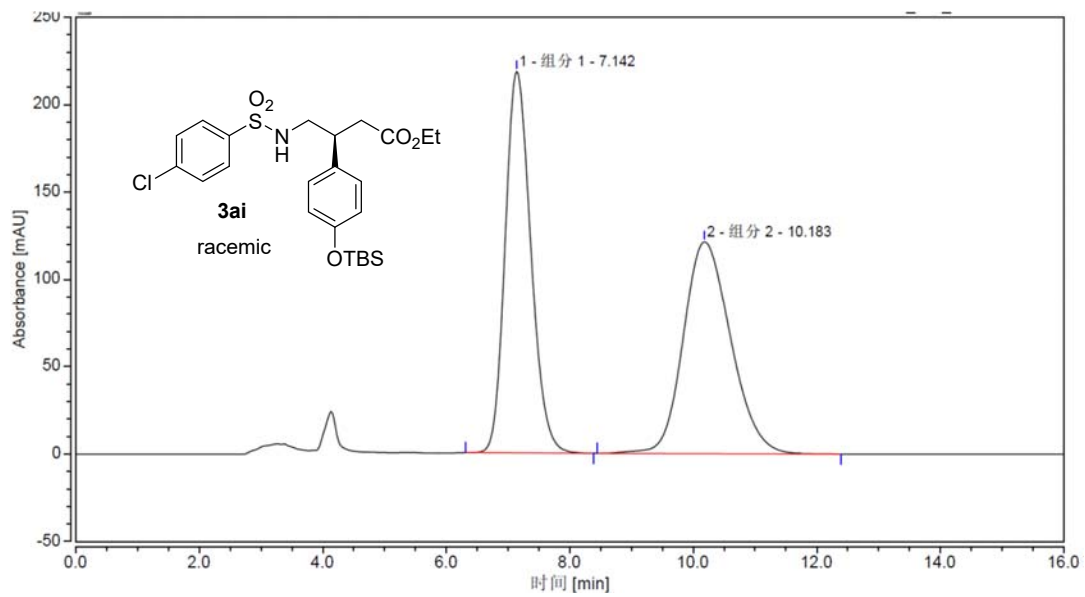

Area Percent Report

| Peak # | RetTime [min] | Area [mAU *min] | Height [mAU] | Area% | Height% |
|--------|---------------|-----------------|--------------|-------|---------|
| 1      | 7.142         | 105.103         | 218.426      | 49.37 | 64.29   |
| 2      | 10.183        | 107.789         | 121.330      | 50.63 | 35.71   |

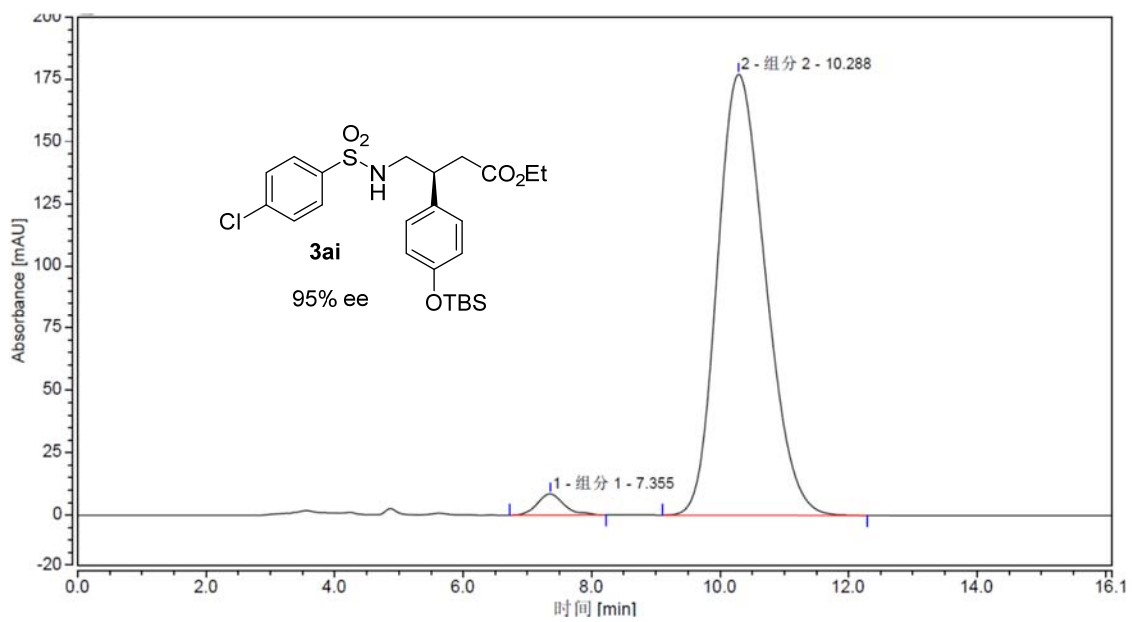

Area Percent Report

| Peak # | RetTime [min] | Area [mAU *min] | Height [mAU] | Area% | Height% |
|--------|---------------|-----------------|--------------|-------|---------|
| 1      | 7.355         | 4.118           | 8.458        | 2.62  | 4.56    |
| 2      | 10.288        | 152.782         | 177.069      | 97.38 | 95.44   |

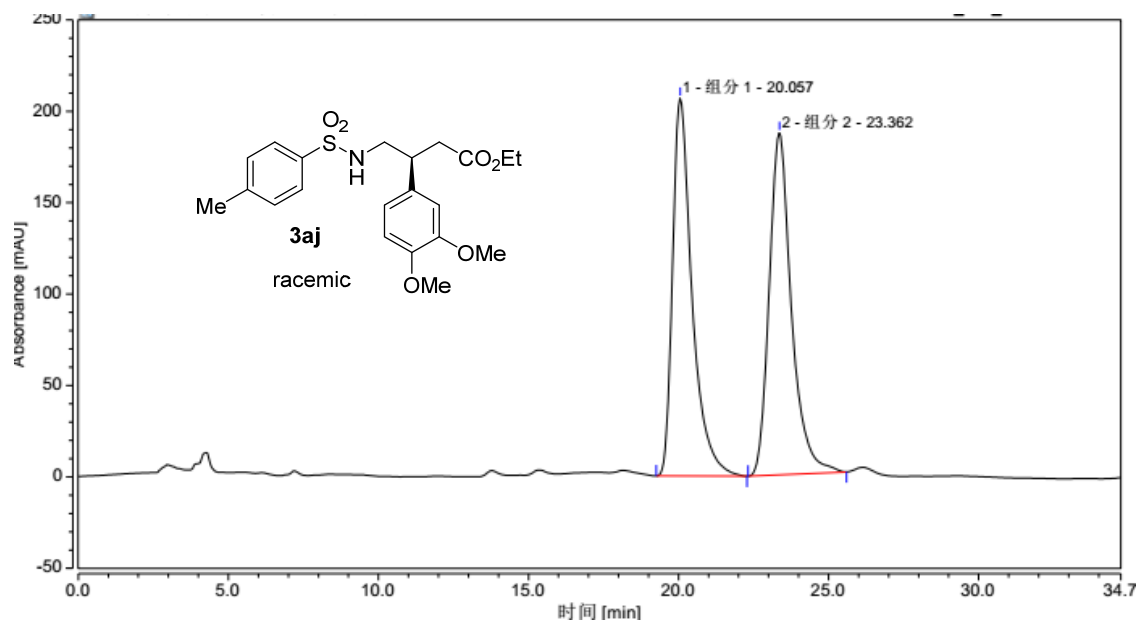

| Area Percent Report |               |                 |              |       |         |
|---------------------|---------------|-----------------|--------------|-------|---------|
| Peak #              | RetTime [min] | Area [mAU *min] | Height [mAU] | Area% | Height% |
| 1                   | 20.057        | 155.617         | 206.701      | 49.25 | 52.48   |
| 2                   | 23.362        | 160.345         | 187.138      | 50.75 | 47.52   |

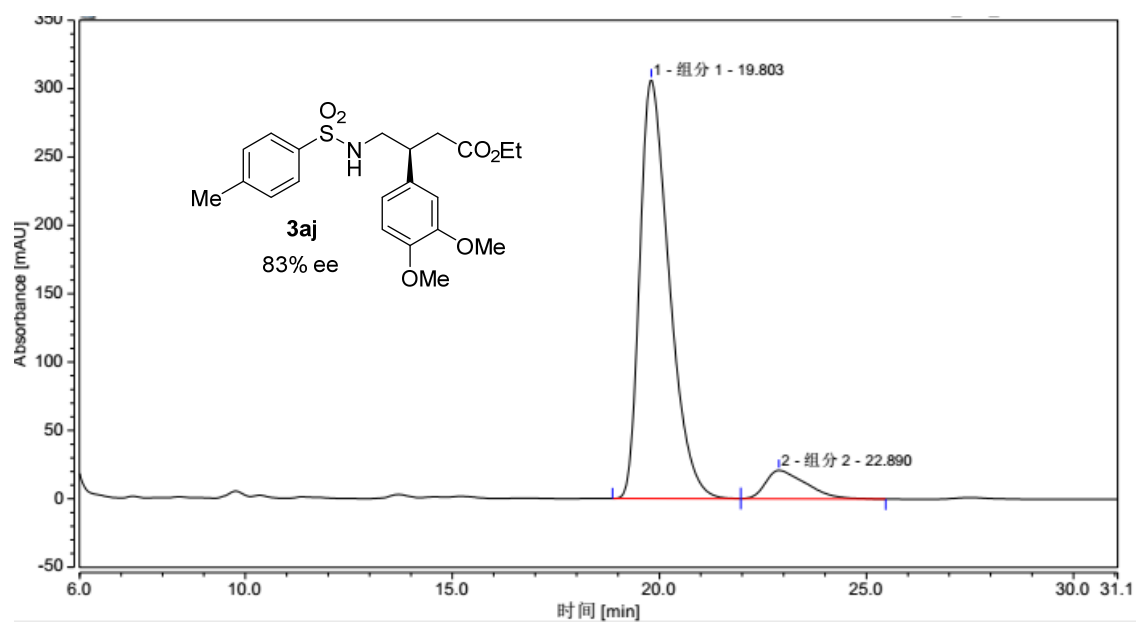

| Area Percent Report |               |                 |              |       |         |
|---------------------|---------------|-----------------|--------------|-------|---------|
| Peak #              | RetTime [min] | Area [mAU *min] | Height [mAU] | Area% | Height% |
| 1                   | 19.803        | 252.297         | 306.295      | 91.43 | 93.62   |
| 2                   | 22.890        | 23.641          | 20.872       | 8.57  | 6.38    |

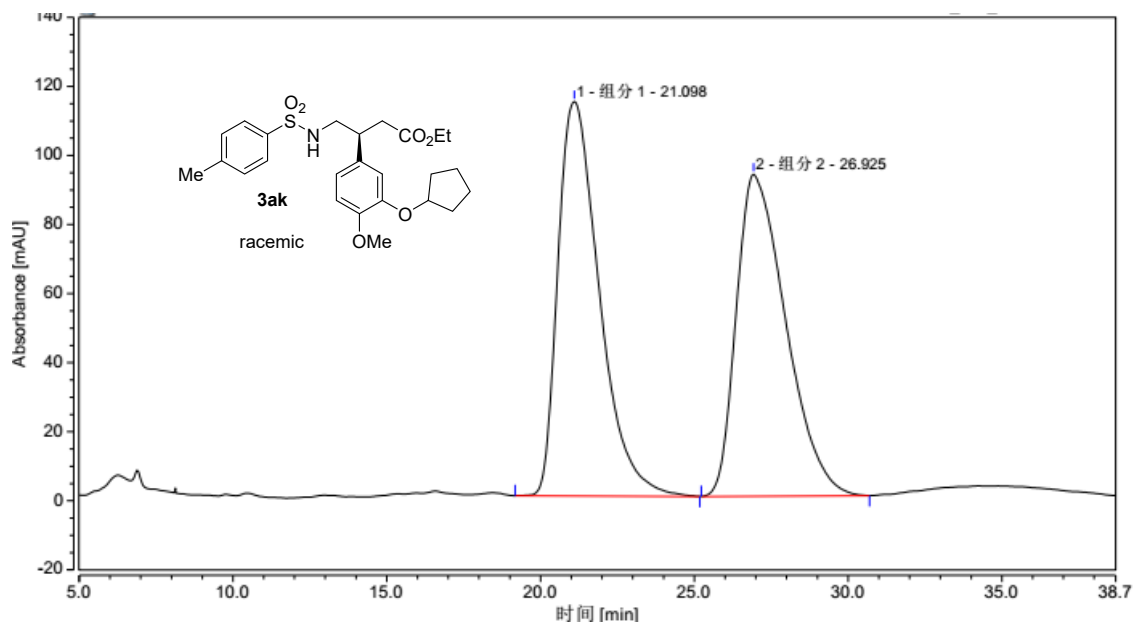

| Area Percent Report |               |                 |              |       |         |
|---------------------|---------------|-----------------|--------------|-------|---------|
| Peak #              | RetTime [min] | Area [mAU *min] | Height [mAU] | Area% | Height% |
| 1                   | 21.098        | 177.983         | 114.205      | 50.62 | 55.06   |
| 2                   | 26.925        | 173.628         | 93.225       | 49.38 | 44.94   |

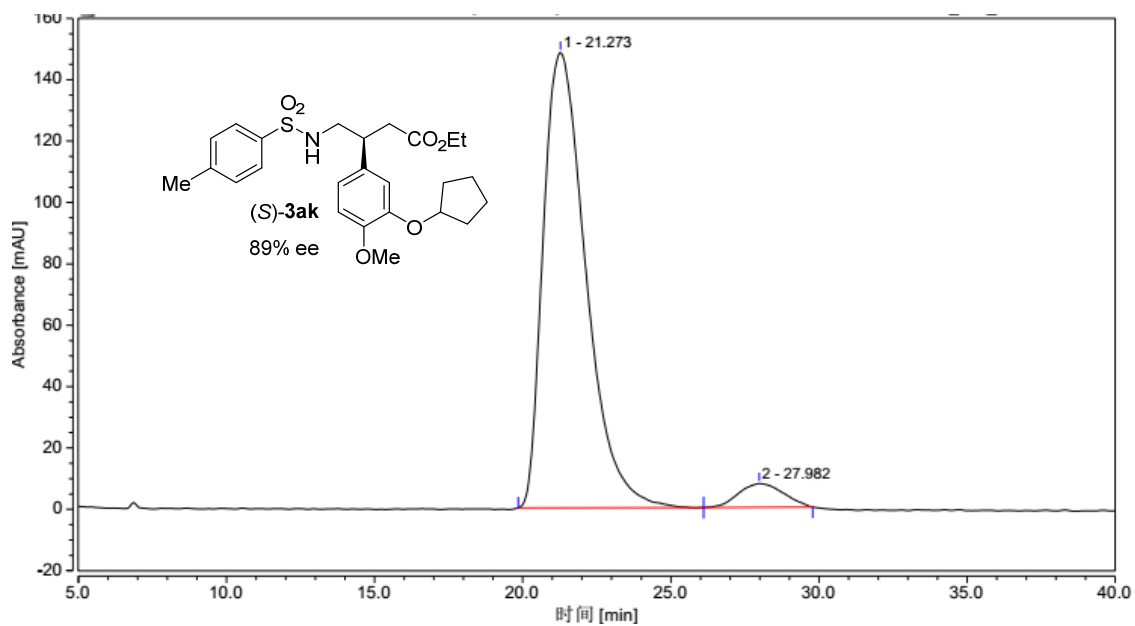

| Area Percent Report |               |                 |              |       |         |
|---------------------|---------------|-----------------|--------------|-------|---------|
| Peak #              | RetTime [min] | Area [mAU *min] | Height [mAU] | Area% | Height% |
| 1                   | 21.273        | 247.493         | 148.386      | 94.79 | 95.06   |
| 2                   | 27.982        | 13.616          | 7.717        | 5.21  | 4.94    |



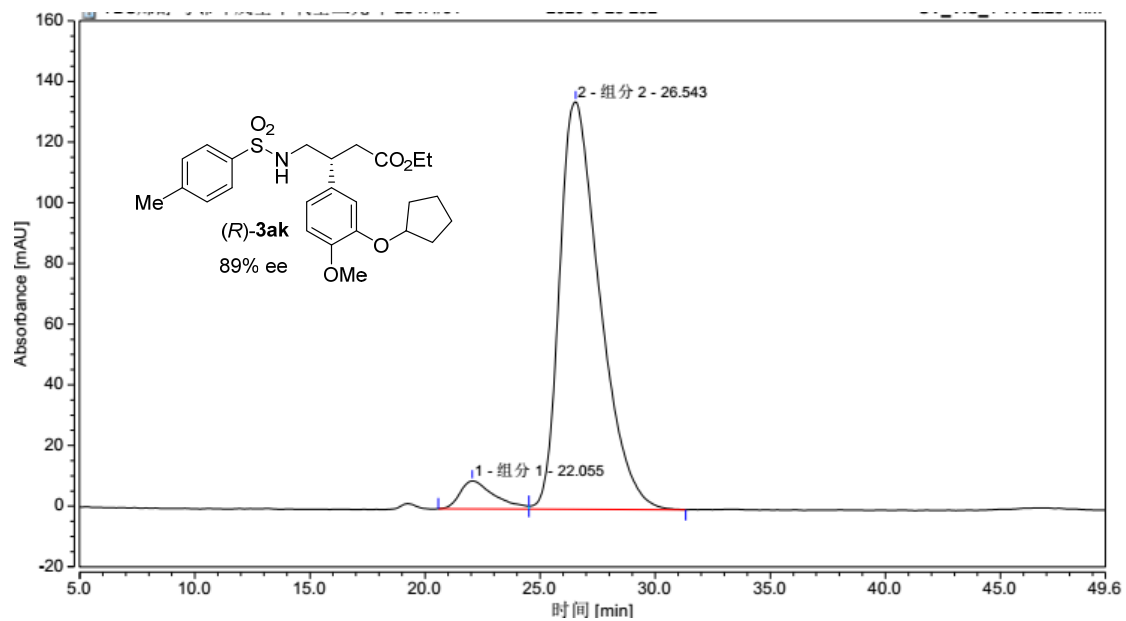

| Area Percent Report |               |                 |              |       |         |
|---------------------|---------------|-----------------|--------------|-------|---------|
| Peak #              | RetTime [min] | Area [mAU *min] | Height [mAU] | Area% | Height% |
| 1                   | 22.055        | 15.816          | 9.168        | 5.50  | 6.39    |
| 2                   | 26.543        | 271.906         | 134.314      | 94.50 | 93.61   |

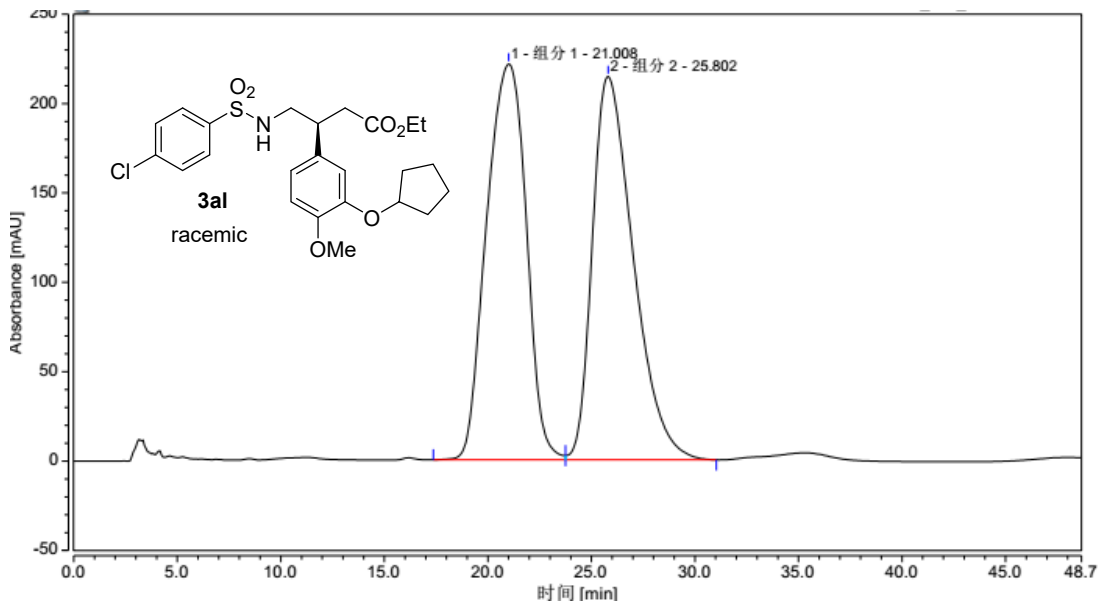

| Area Percent Report |               |                 |              |        |          |
|---------------------|---------------|-----------------|--------------|--------|----------|
| Peak #              | RetTime [min] | Area [mAU *min] | Height [mAU] | Area % | Height % |
| 1                   | 21.008        | 492.594         | 221.457      | 50.06  | 50.80    |
| 2                   | 25.802        | 491.503         | 214.514      | 49.94  | 49.20    |

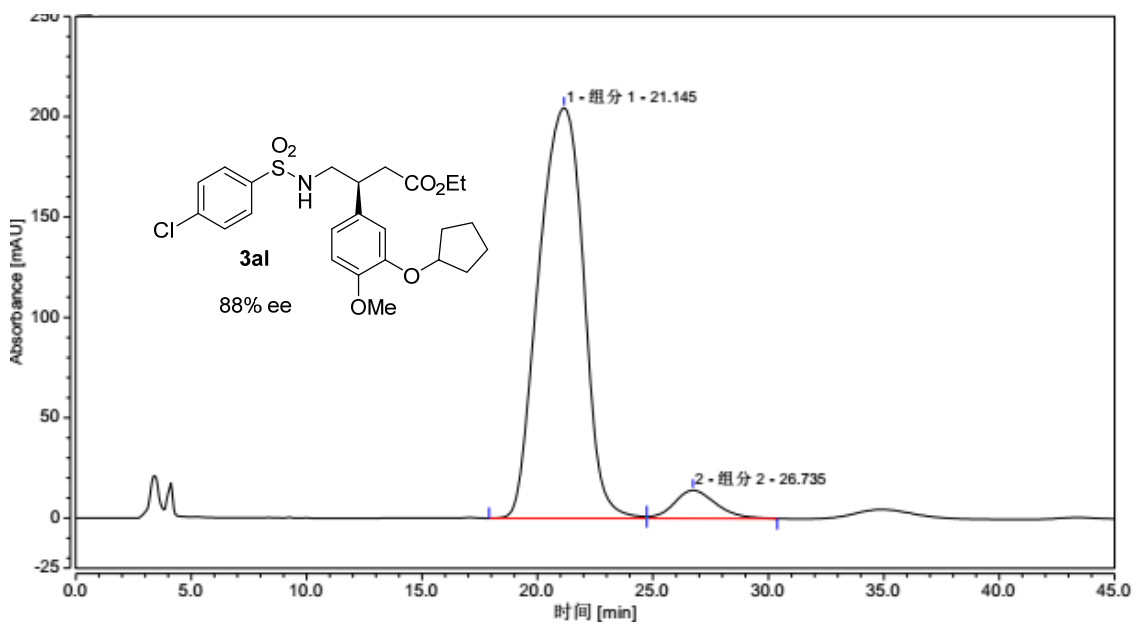

| Area Percent Report |               |                 |              |        |          |
|---------------------|---------------|-----------------|--------------|--------|----------|
| Peak #              | RetTime [min] | Area [mAU *min] | Height [mAU] | Area % | Height % |
| 1                   | 21.145        | 459.736         | 204.485      | 93.97  | 93.59    |
| 2                   | 26.735        | 29.478          | 14.000       | 6.03   | 6.41     |

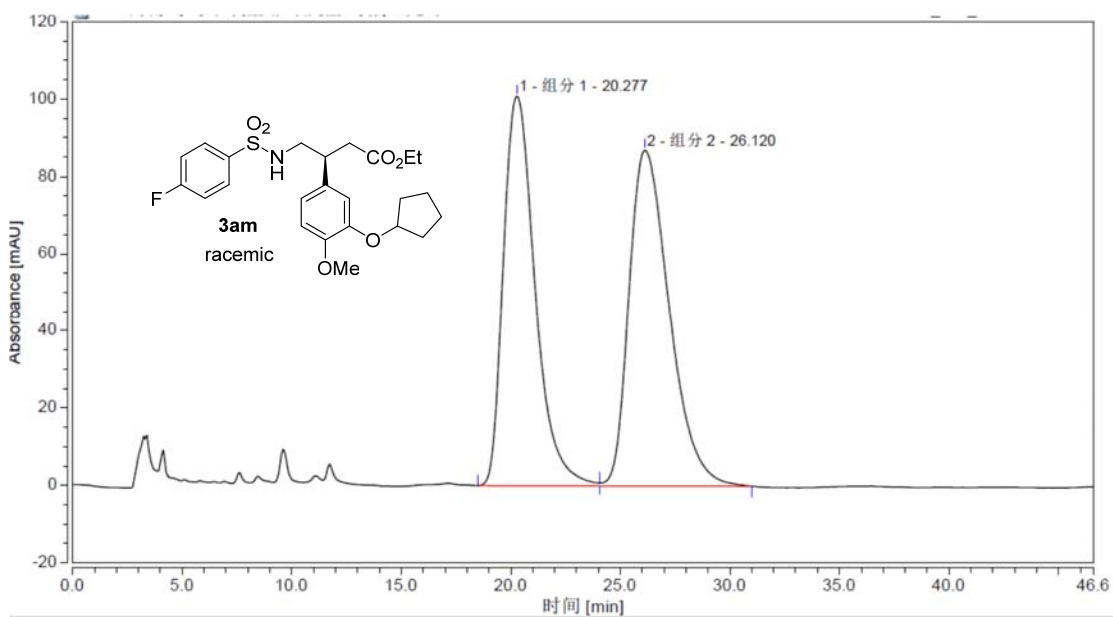

| Area Percent Report |               |                 |              |        |          |
|---------------------|---------------|-----------------|--------------|--------|----------|
| Peak #              | RetTime [min] | Area [mAU *min] | Height [mAU] | Area % | Height % |
| 1                   | 20.277        | 168.820         | 100.827      | 47.69  | 53.72    |
| 2                   | 26.120        | 185.153         | 86.858       | 52.31  | 46.28    |

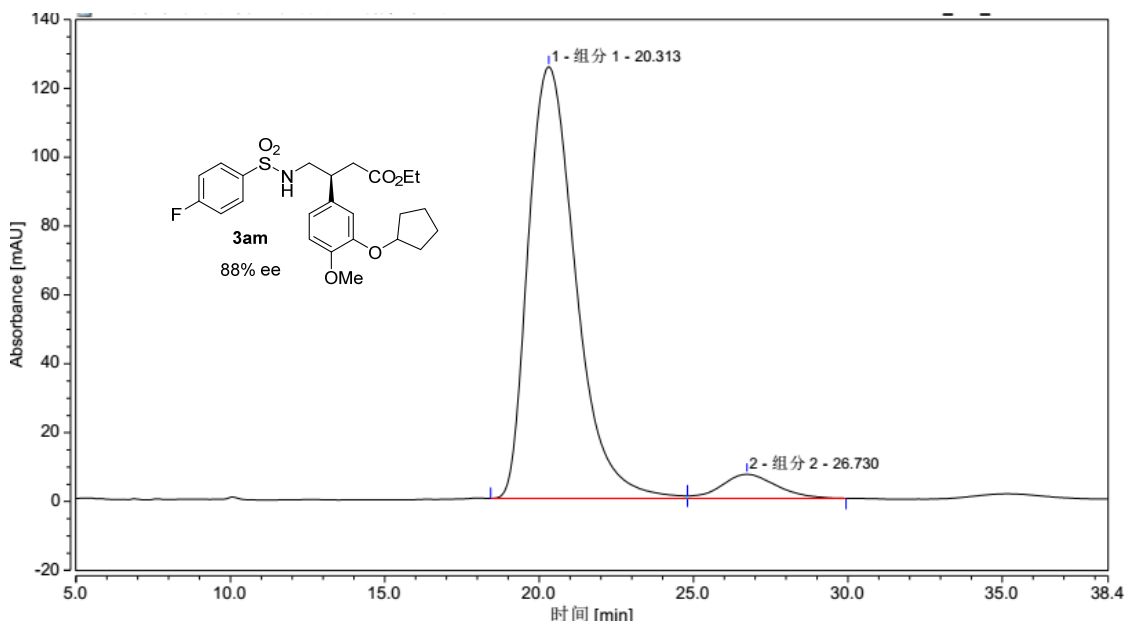

| Area Percent Report |               |                 |              |        |          |
|---------------------|---------------|-----------------|--------------|--------|----------|
| Peak #              | RetTime [min] | Area [mAU *min] | Height [mAU] | Area % | Height % |
| 1                   | 20.313        | 222.875         | 125.369      | 93.96  | 94.73    |
| 2                   | 26.730        | 14.329          | 6.969        | 6.04   | 5.27     |

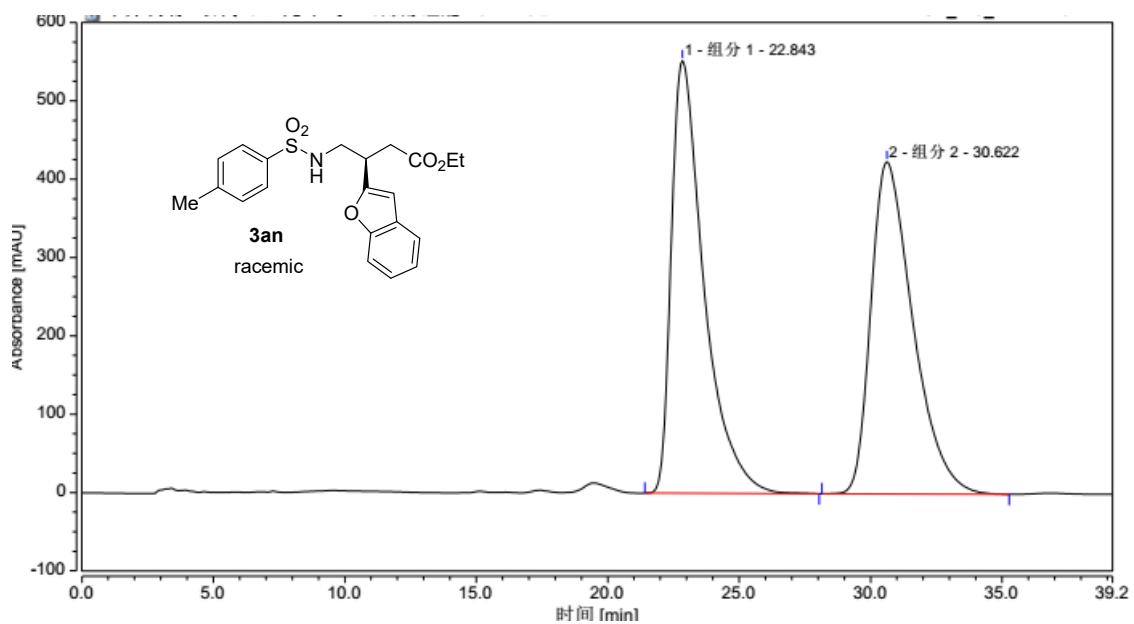

| Area Percent Report |               |                 |              |        |          |
|---------------------|---------------|-----------------|--------------|--------|----------|
| Peak #              | RetTime [min] | Area [mAU *min] | Height [mAU] | Area % | Height % |
| 1                   | 22.843        | 793.696         | 552.029      | 50.32  | 56.56    |
| 2                   | 30.622        | 783.473         | 424.004      | 49.68  | 43.44    |

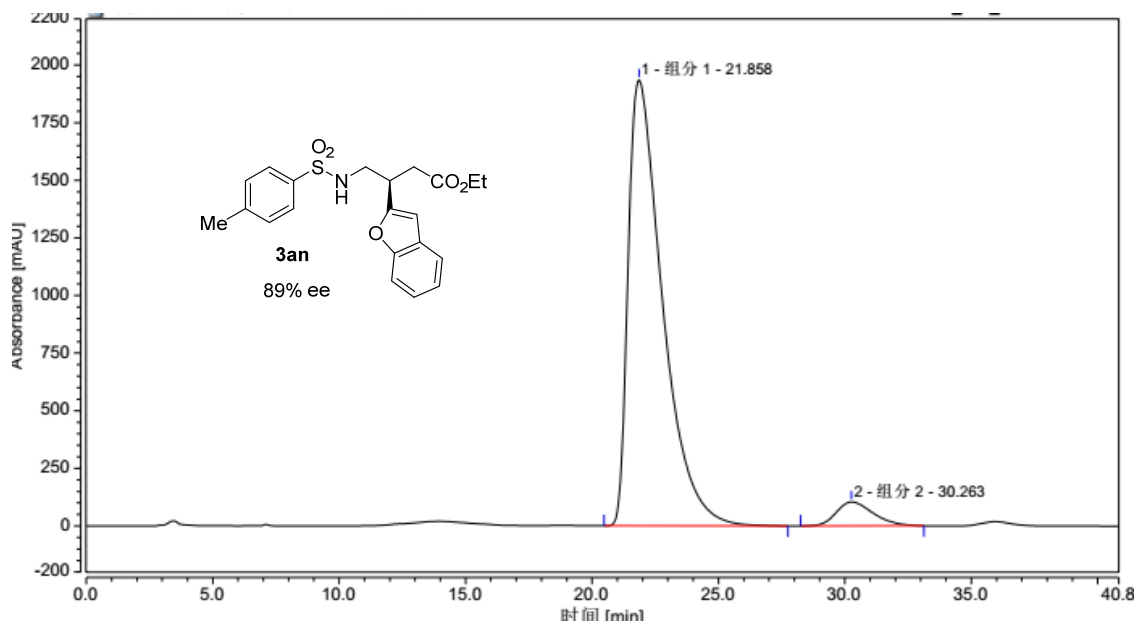

| Area Percent Report |               |                 |              |        |          |
|---------------------|---------------|-----------------|--------------|--------|----------|
| Peak #              | RetTime [min] | Area [mAU *min] | Height [mAU] | Area % | Height % |
| 1                   | 21.858        | 3040.802        | 1935.431     | 94.55  | 94.91    |
| 2                   | 30.263        | 175.797         | 103.852      | 5.45   | 5.09     |

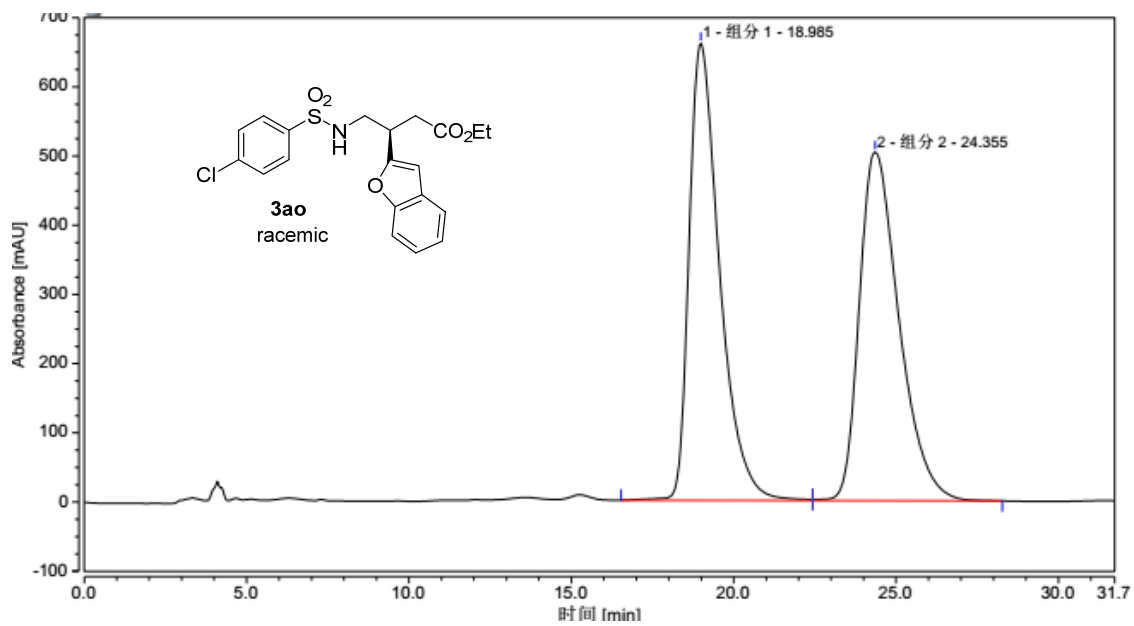

Area Percent Report

| Peak # | RetTime [min] | Area [mAU *min] | Height [mAU] | Area % | Height % |
|--------|---------------|-----------------|--------------|--------|----------|
| 1      | 18.985        | 718.422         | 660.627      | 50.21  | 56.73    |
| 2      | 24.355        | 712.455         | 503.879      | 49.79  | 43.27    |

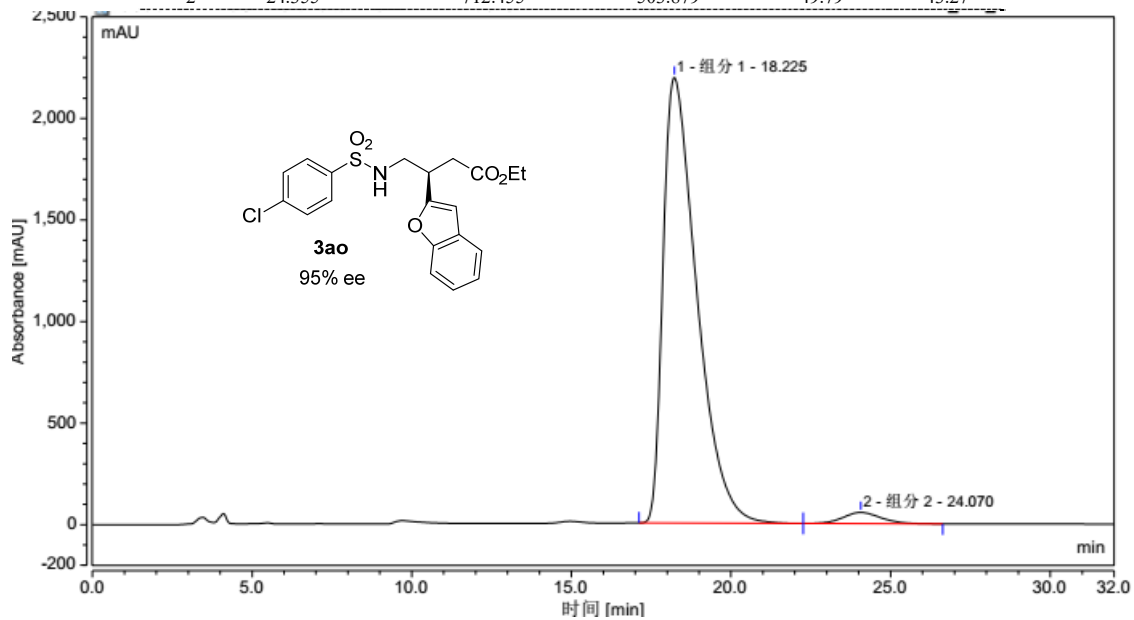

Area Percent Report

| Peak # | RetTime [min] | Area [mAU *min] | Height [mAU] | Area % | Height % |
|--------|---------------|-----------------|--------------|--------|----------|
| 1      | 18.225        | 2679.058        | 2194.841     | 97.26  | 97.56    |
| 2      | 24.070        | 75.450          | 54.954       | 2.74   | 2.44     |

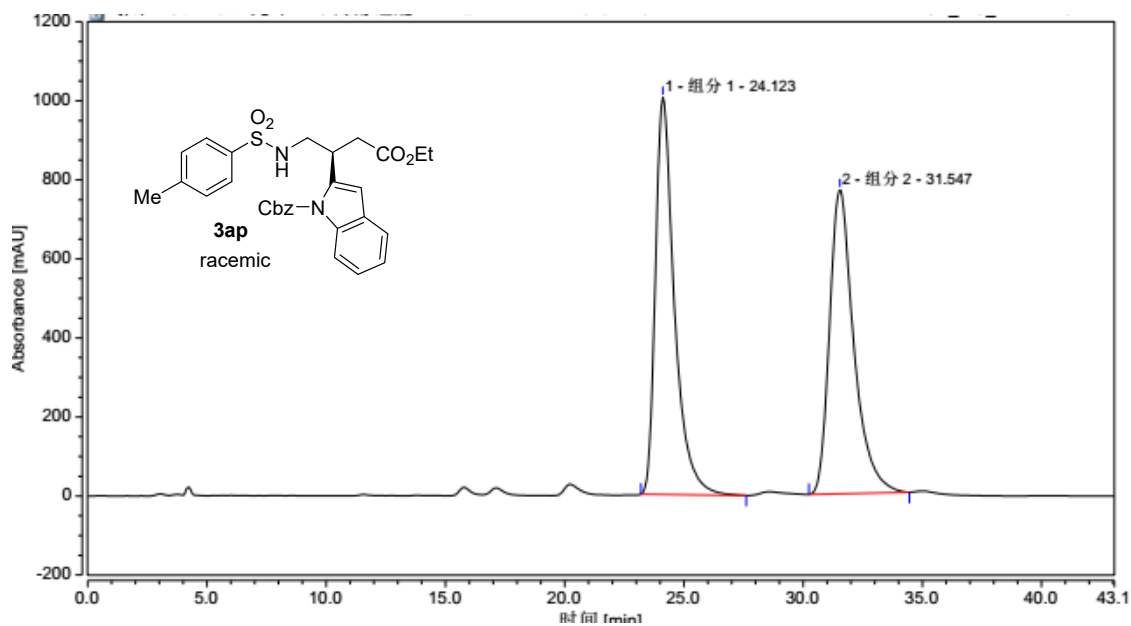

| Area Percent Report |               |                 |              |        |          |
|---------------------|---------------|-----------------|--------------|--------|----------|
| Peak #              | RetTime [min] | Area [mAU *min] | Height [mAU] | Area % | Height % |
| 1                   | 24.123        | 927.190         | 1004.609     | 50.55  | 56.65    |
| 2                   | 31.547        | 906.845         | 768.735      | 49.45  | 43.35    |

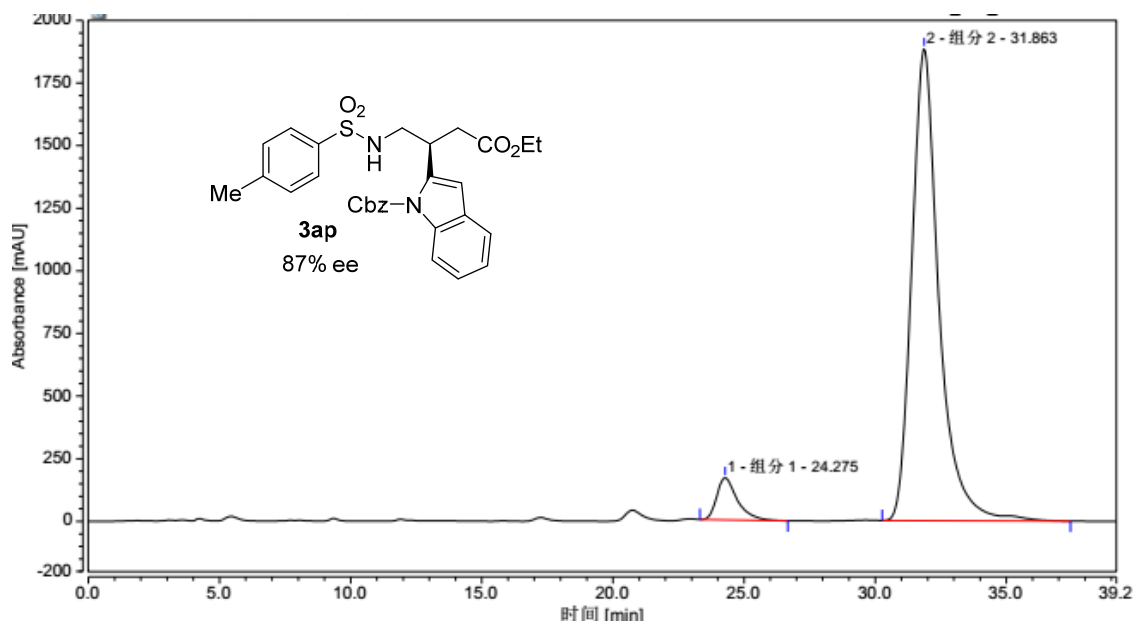

| Area Percent Report |               |                 |              |        |          |
|---------------------|---------------|-----------------|--------------|--------|----------|
| Peak #              | RetTime [min] | Area [mAU *min] | Height [mAU] | Area % | Height % |
| 1                   | 24.275        | 153.485         | 168.334      | 6.34   | 8.20     |
| 2                   | 31.863        | 2267.590        | 1884.634     | 93.66  | 91.80    |

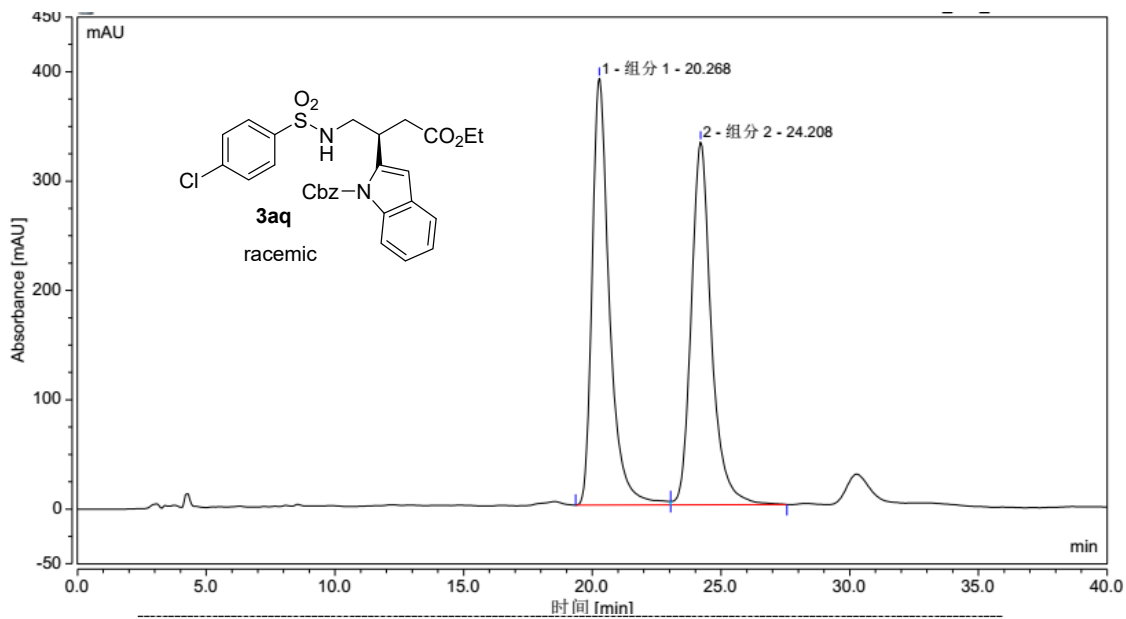

| Area Percent Report |               |                 |              |        |          |
|---------------------|---------------|-----------------|--------------|--------|----------|
| Peak #              | RetTime [min] | Area [mAU *min] | Height [mAU] | Area % | Height % |
| 1                   | 20.268        | 304.496         | 390.214      | 50.28  | 54.04    |
| 2                   | 24.208        | 301.134         | 331.882      | 49.72  | 45.96    |

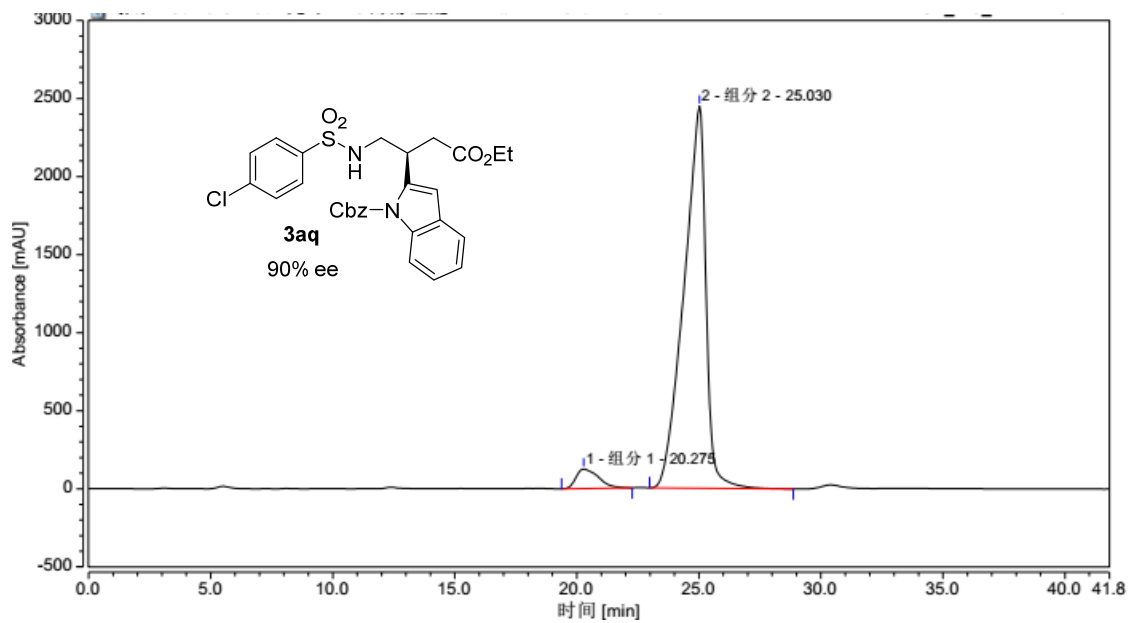

| Area Percent Report |               |                 |              |        |          |
|---------------------|---------------|-----------------|--------------|--------|----------|
| Peak #              | RetTime [min] | Area [mAU *min] | Height [mAU] | Area % | Height % |
| 1                   | 20.275        | 131.909         | 124.356      | 4.92   | 4.84     |
| 2                   | 25.030        | 2548.352        | 2447.098     | 95.08  | 95.16    |

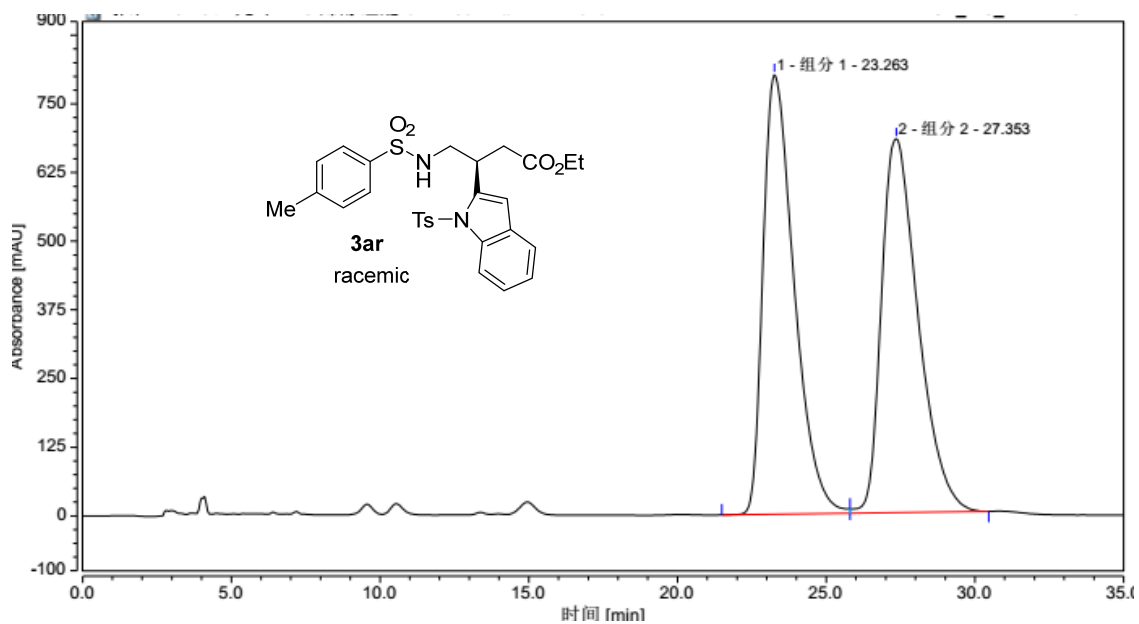

| Area Percent Report |               |                 |              |        |          |
|---------------------|---------------|-----------------|--------------|--------|----------|
| Peak #              | RetTime [min] | Area [mAU *min] | Height [mAU] | Area % | Height % |
| 1                   | 23.263        | 968.460         | 800.255      | 49.94  | 54.06    |
| 2                   | 27.353        | 970.825         | 680.547      | 50.06  | 45.94    |

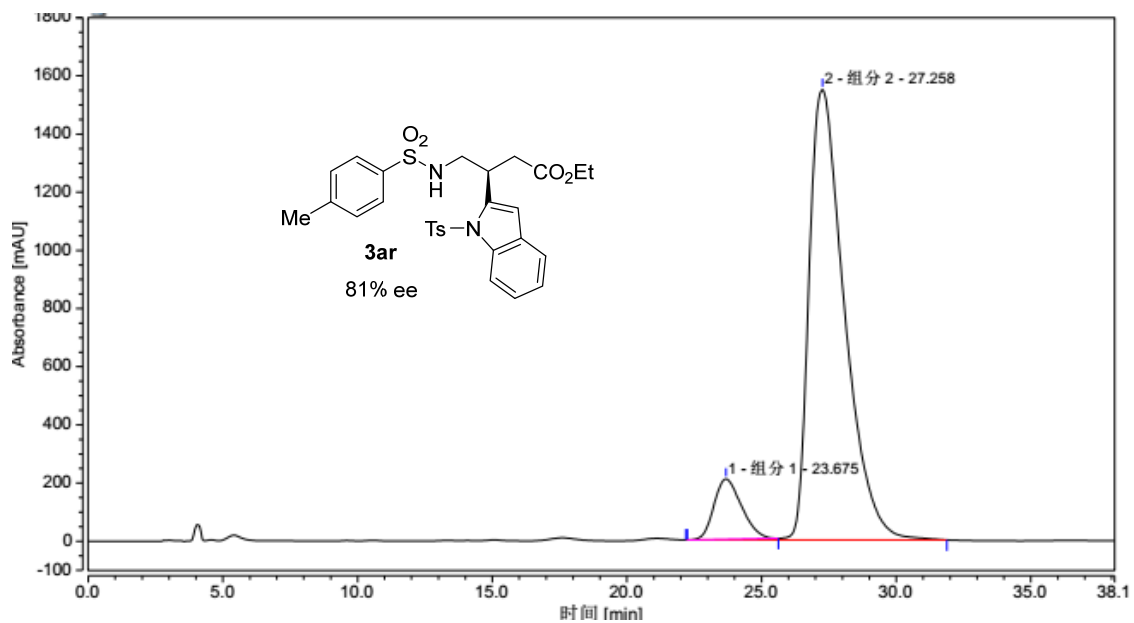

| Area Percent Report |               |                 |              |        |          |
|---------------------|---------------|-----------------|--------------|--------|----------|
| Peak #              | RetTime [min] | Area [mAU *min] | Height [mAU] | Area % | Height % |
| 1                   | 23.675        | 245.290         | 207.043      | 9.39   | 11.79    |
| 2                   | 27.258        | 2367.231        | 1548.801     | 90.61  | 88.21    |



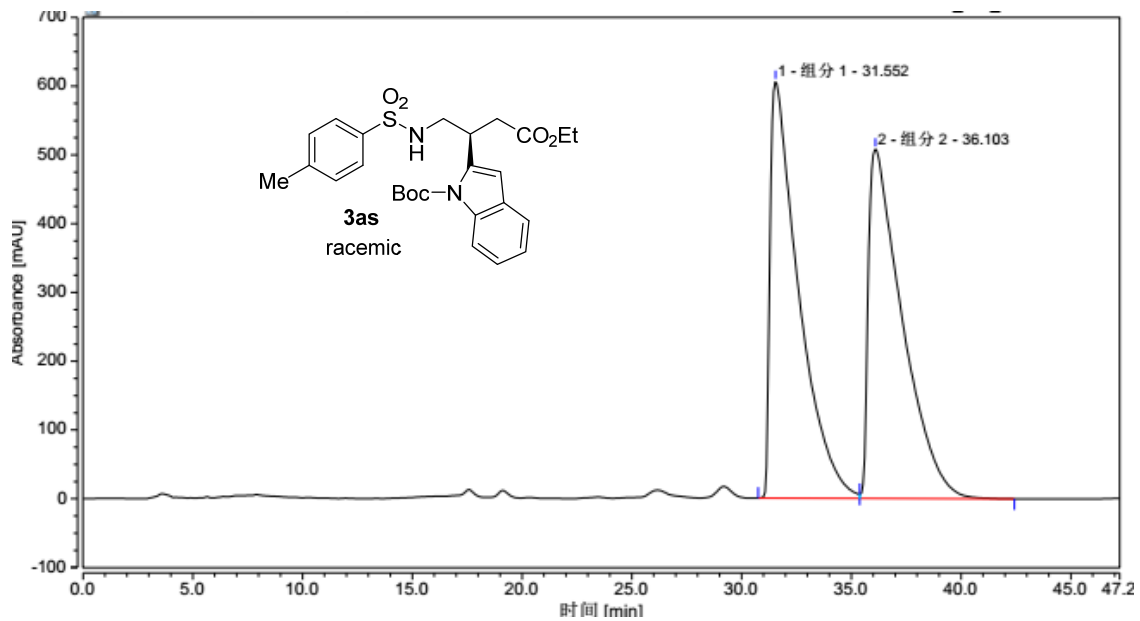

| Area Percent Report |               |                 |              |        |          |
|---------------------|---------------|-----------------|--------------|--------|----------|
| Peak #              | RetTime [min] | Area [mAU *min] | Height [mAU] | Area % | Height % |
| 1                   | 31.552        | 914.433         | 605.655      | 50.19  | 54.38    |
| 2                   | 36.103        | 907.671         | 508.065      | 49.81  | 45.62    |

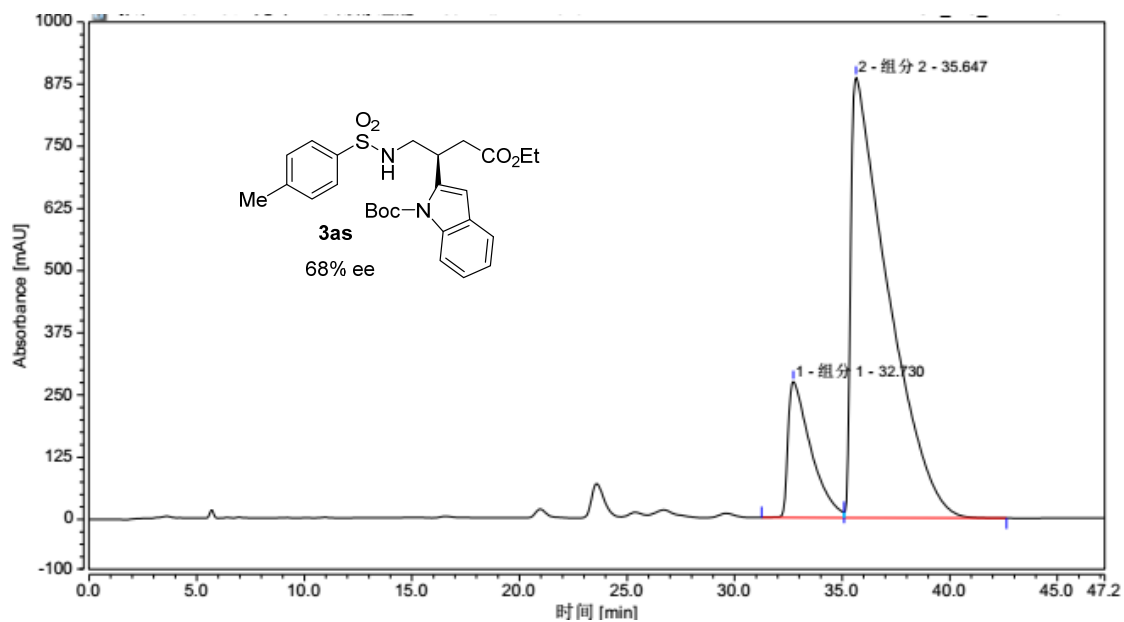

| Area Percent Report |               |                 |              |        |          |
|---------------------|---------------|-----------------|--------------|--------|----------|
| Peak #              | RetTime [min] | Area [mAU *min] | Height [mAU] | Area % | Height % |
| 1                   | 32.730        | 334.737         | 273.200      | 15.85  | 23.57    |
| 2                   | 35.647        | 1777.441        | 885.828      | 84.15  | 76.43    |

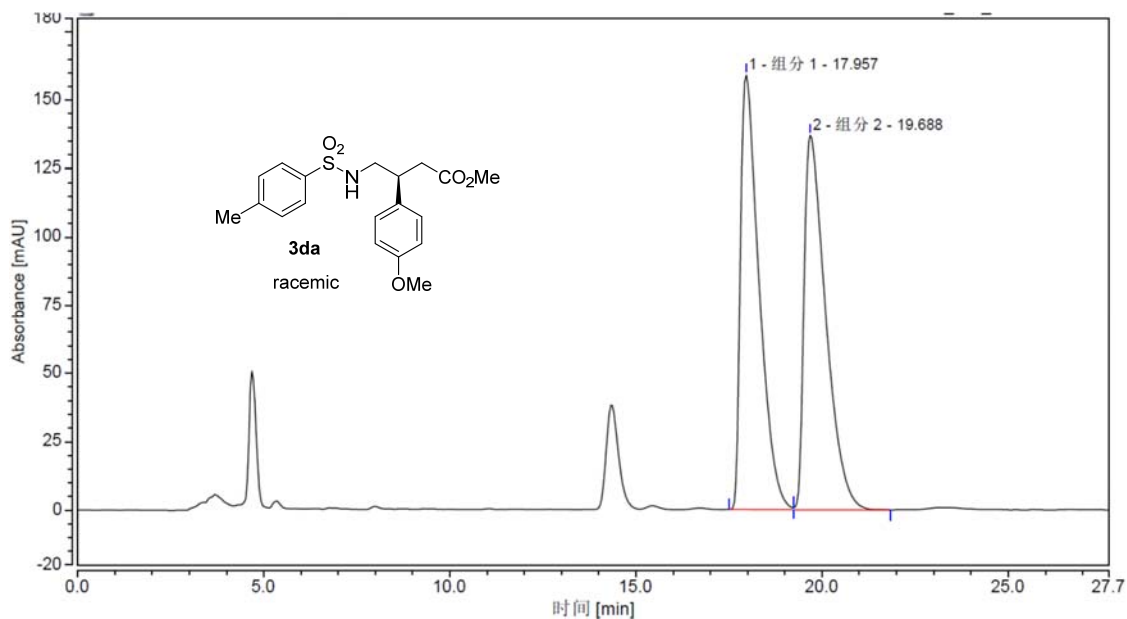

| Area Percent Report |               |                 |              |        |          |
|---------------------|---------------|-----------------|--------------|--------|----------|
| Peak #              | RetTime [min] | Area [mAU *min] | Height [mAU] | Area % | Height % |
| 1                   | 17.957        | 91.802          | 158.766      | 49.90  | 53.70    |
| 2                   | 19.688        | 92.156          | 136.901      | 50.10  | 46.30    |

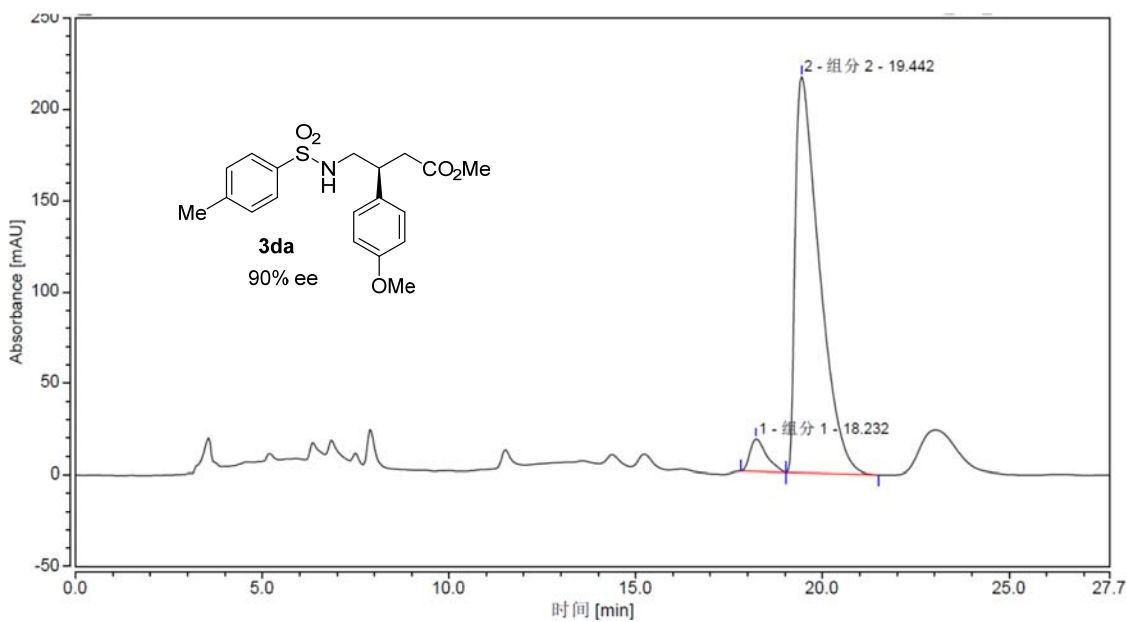

| Area Percent Report |               |                 |              |        |          |
|---------------------|---------------|-----------------|--------------|--------|----------|
| Peak #              | RetTime [min] | Area [mAU *min] | Height [mAU] | Area % | Height % |
| 1                   | 18.232        | 8.484           | 17.080       | 4.98   | 7.30     |
| 2                   | 19.442        | 161.981         | 216.869      | 95.02  | 92.70    |

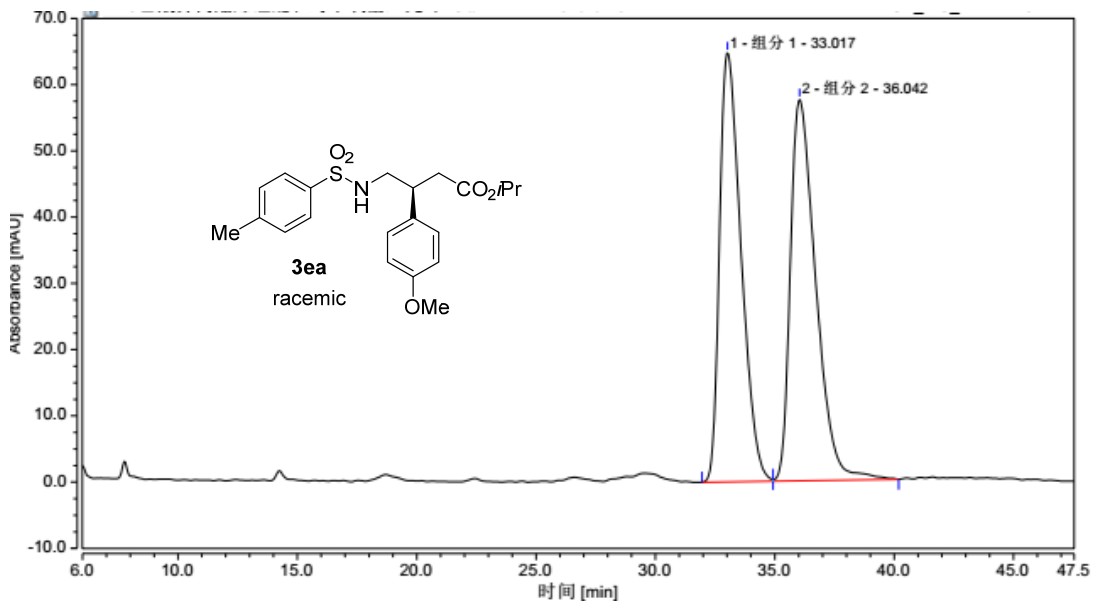

Area Percent Report

| Peak # | RetTime [min] | Area [mAU *min] | Height [mAU] | Area % | Height % |
|--------|---------------|-----------------|--------------|--------|----------|
| 1      | 33.017        | 67.563          | 64.813       | 48.78  | 52.95    |
| 2      | 36.042        | 70.937          | 57.595       | 51.22  | 47.05    |

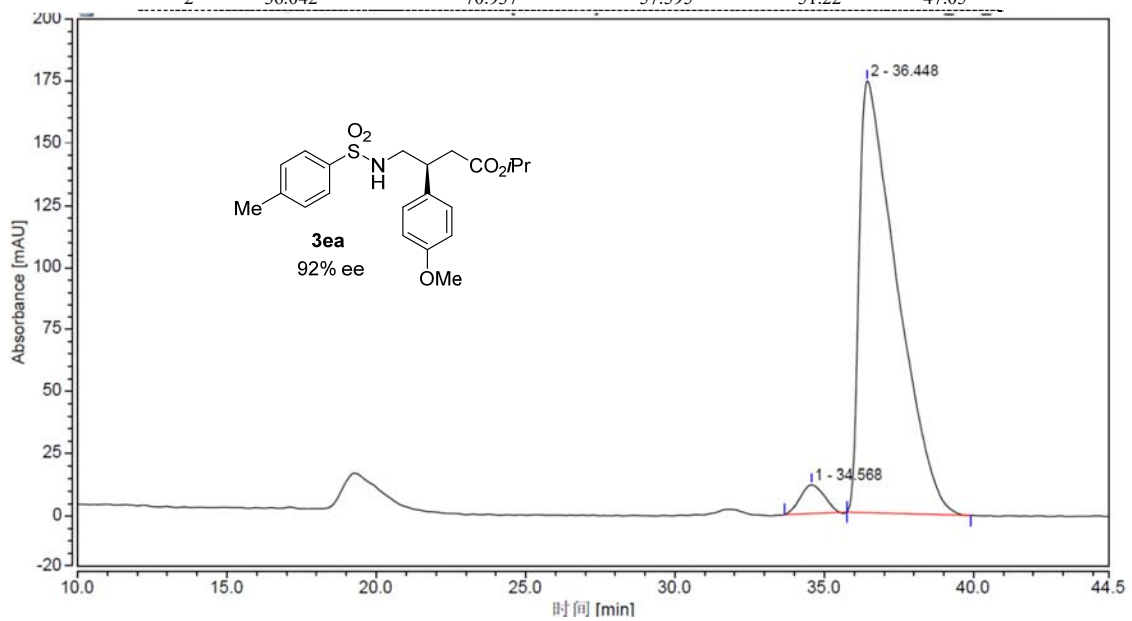

Area Percent Report

| Peak # | RetTime [min] | Area [mAU *min] | Height [mAU] | Area % | Height % |
|--------|---------------|-----------------|--------------|--------|----------|
| 1      | 34.568        | 10.550          | 11.527       | 3.99   | 6.23     |
| 2      | 36.448        | 253.589         | 173.606      | 96.01  | 93.77    |

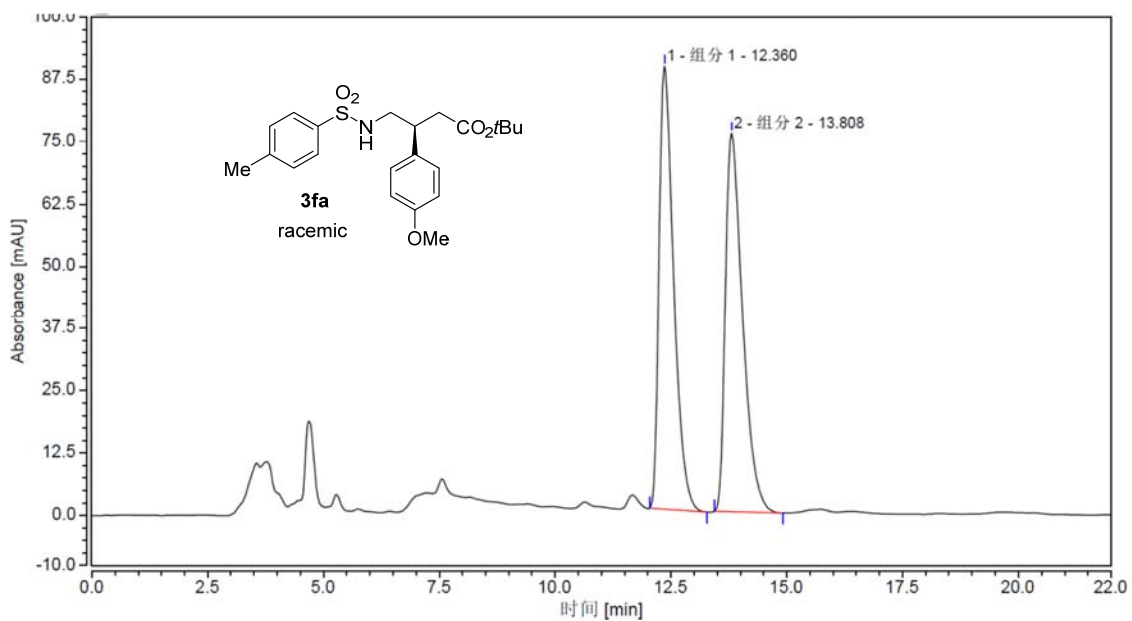

| Area Percent Report |               |                 |              |        |          |
|---------------------|---------------|-----------------|--------------|--------|----------|
| Peak #              | RetTime [min] | Area [mAU *min] | Height [mAU] | Area % | Height % |
| 1                   | 12.360        | 32.404          | 88.877       | 49.79  | 53.95    |
| 2                   | 13.808        | 32.671          | 75.873       | 50.21  | 46.05    |

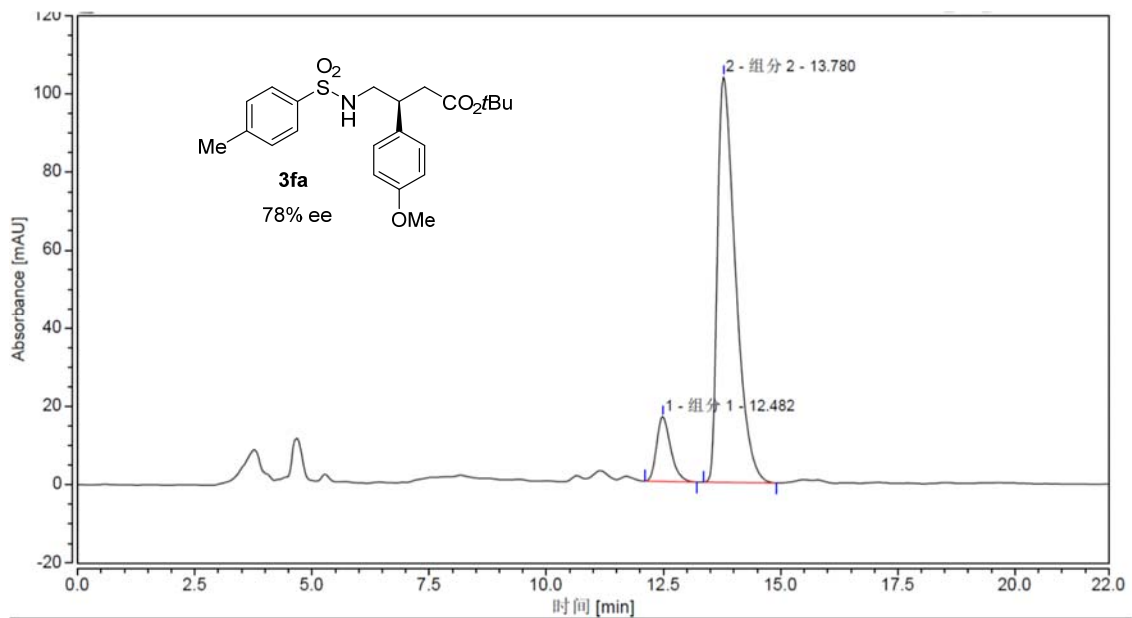

| Area Percent Report |               |                 |              |        |          |
|---------------------|---------------|-----------------|--------------|--------|----------|
| Peak #              | RetTime [min] | Area [mAU *min] | Height [mAU] | Area % | Height % |
| 1                   | 12.482        | 5.778           | 16.593       | 11.11  | 13.78    |
| 2                   | 13.780        | 46.211          | 103.780      | 88.89  | 86.22    |

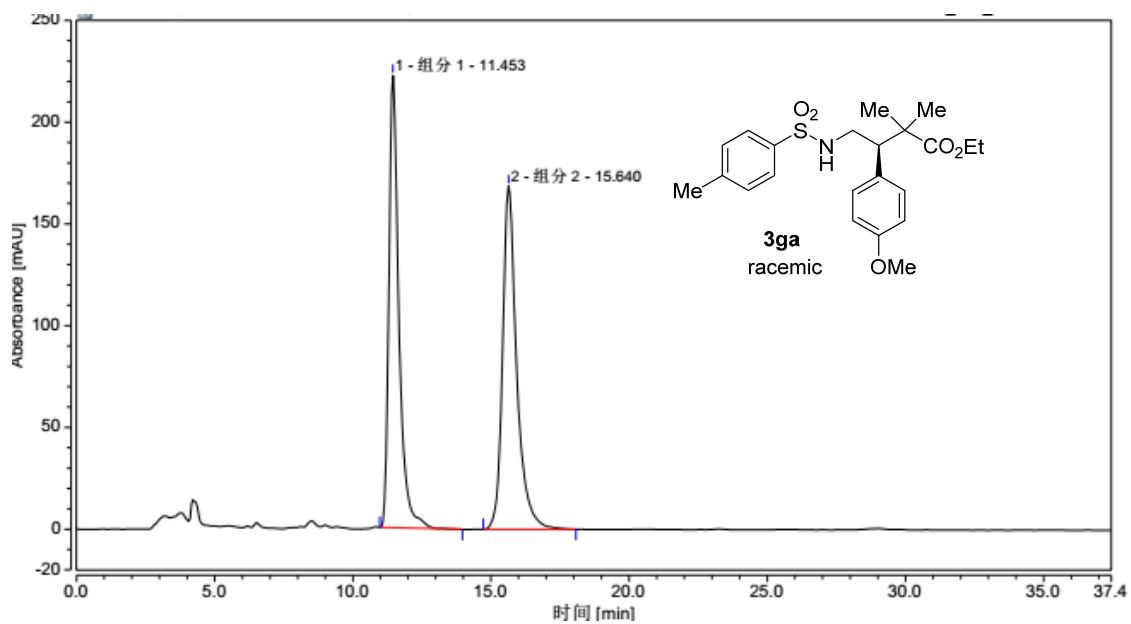

Area Percent Report

| Peak # | RetTime [min] | Area [mAU *min] | Height [mAU] | Area % | Height % |
|--------|---------------|-----------------|--------------|--------|----------|
| 1      | 11.453        | 92.932          | 222.208      | 48.20  | 56.84    |
| 2      | 15.640        | 99.854          | 168.728      | 51.80  | 43.16    |

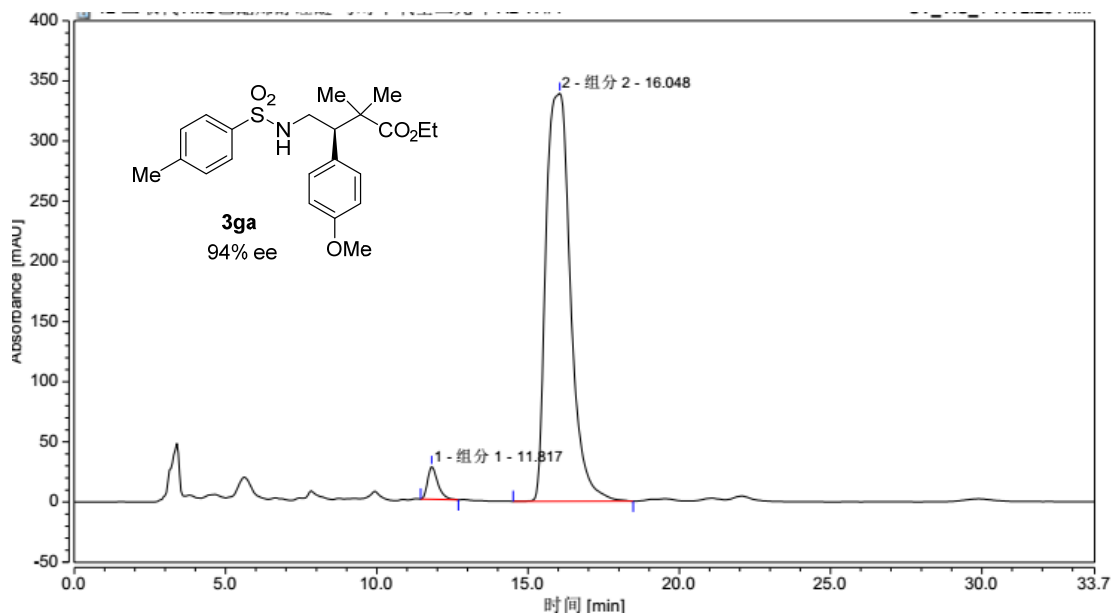

Area Percent Report

| Peak # | RetTime [min] | Area [mAU *min] | Height [mAU] | Area % | Height % |
|--------|---------------|-----------------|--------------|--------|----------|
| 1      | 11.817        | 10.667          | 27.154       | 3.25   | 7.42     |
| 2      | 16.048        | 317.995         | 338.949      | 96.75  | 92.58    |

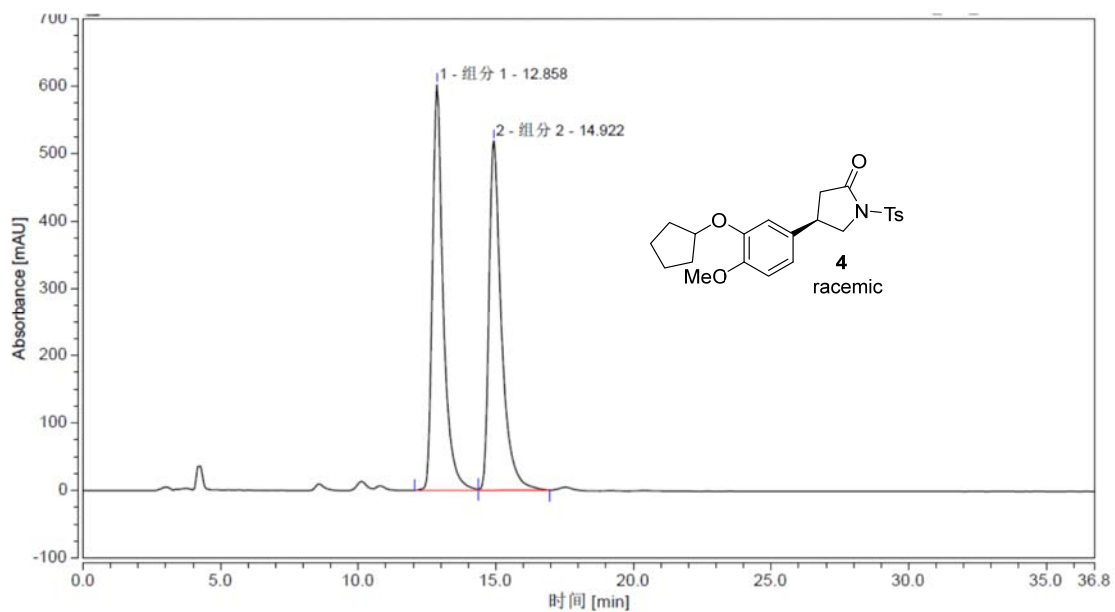

| Area Percent Report |               |                 |              |        |          |
|---------------------|---------------|-----------------|--------------|--------|----------|
| Peak #              | RetTime [min] | Area [mAU *min] | Height [mAU] | Area % | Height % |
| 1                   | 12.858        | 275.507         | 602.185      | 50.30  | 53.74    |
| 2                   | 14.922        | 272.170         | 518.402      | 49.70  | 46.26    |

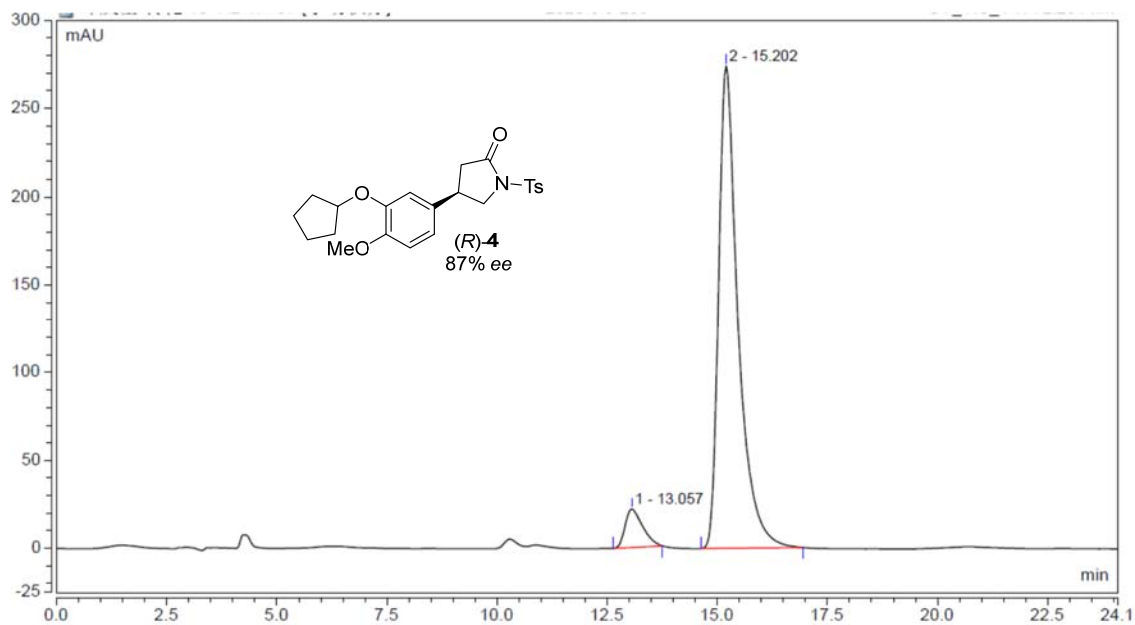

| Area Percent Report |               |                 |              |        |          |
|---------------------|---------------|-----------------|--------------|--------|----------|
| Peak #              | RetTime [min] | Area [mAU *min] | Height [mAU] | Area % | Height % |
| 1                   | 13.057        | 10.016          | 21.808       | 6.66   | 7.37     |
| 2                   | 15.202        | 140.266         | 274.162      | 93.34  | 92.63    |

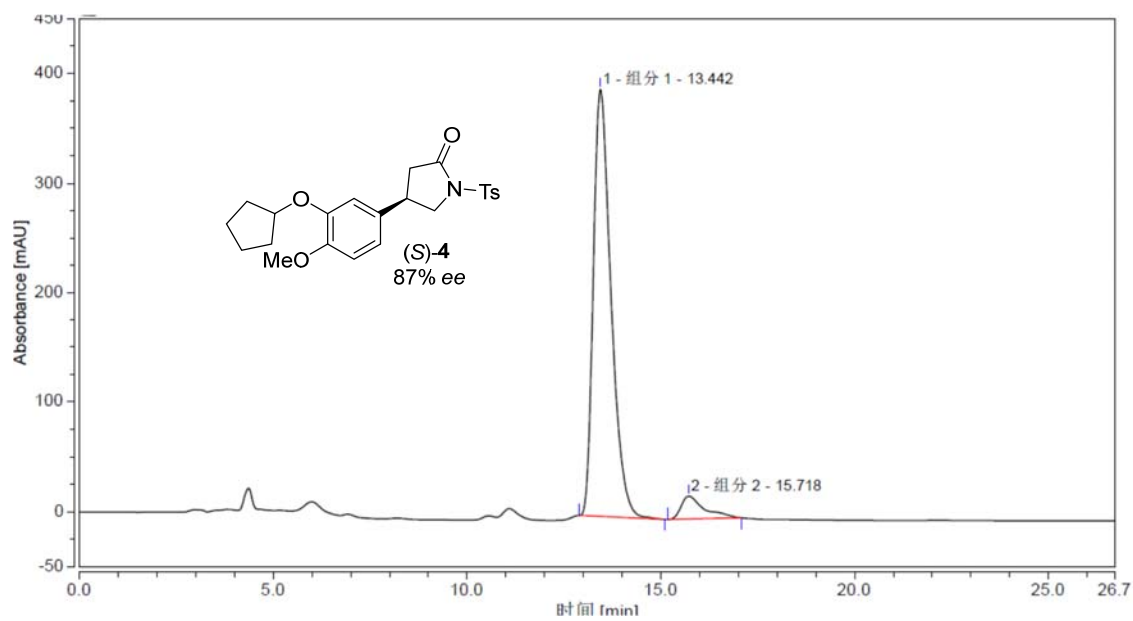

| Area Percent Report |               |                 |              |        |          |
|---------------------|---------------|-----------------|--------------|--------|----------|
| Peak #              | RetTime [min] | Area [mAU *min] | Height [mAU] | Area % | Height % |
| 1                   | 13.422        | 205.266         | 389.448      | 93.43  | 94.94    |
| 2                   | 15.718        | 14.440          | 20.774       | 6.57   | 5.06     |

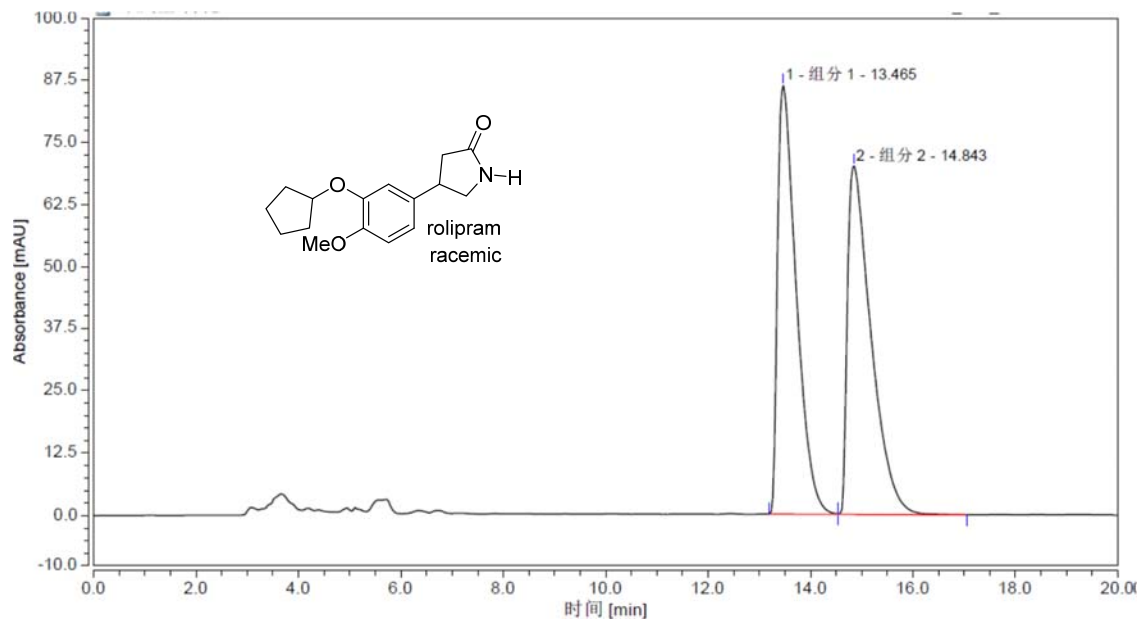

| Area Percent Report |               |                 |              |        |          |
|---------------------|---------------|-----------------|--------------|--------|----------|
| Peak #              | RetTime [min] | Area [mAU *min] | Height [mAU] | Area % | Height % |
| 1                   | 13.465        | 36.500          | 86.221       | 49.55  | 55.14    |
| 2                   | 14.843        | 37.166          | 70.140       | 50.45  | 44.86    |

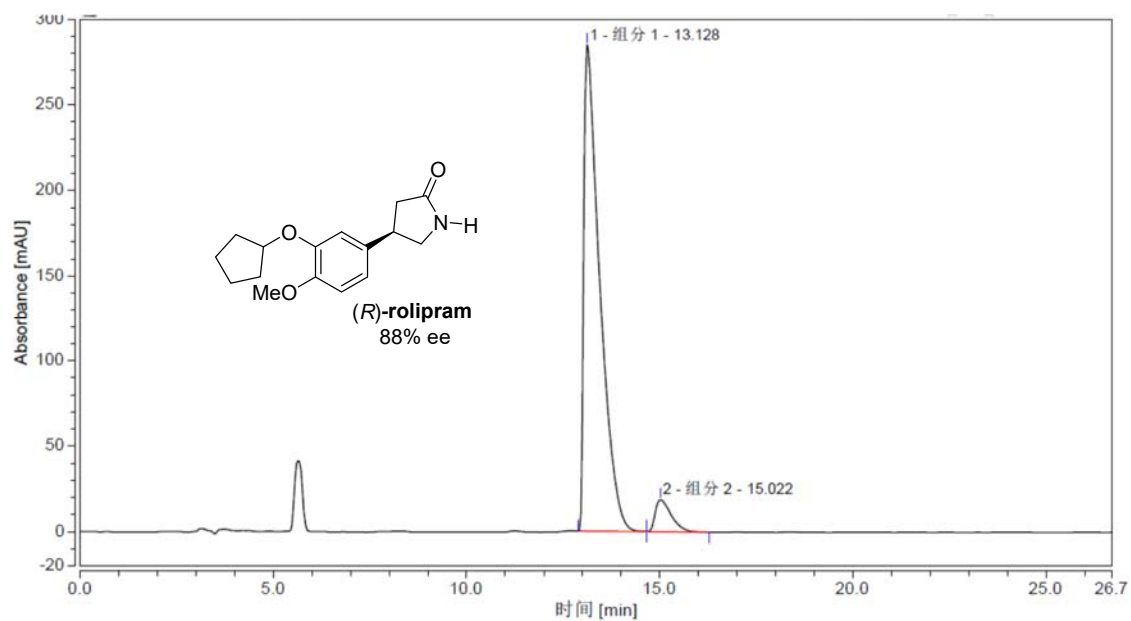

| Area Percent Report |               |                 |              |        |          |
|---------------------|---------------|-----------------|--------------|--------|----------|
| Peak #              | RetTime [min] | Area [mAU *min] | Height [mAU] | Area % | Height % |
| 1                   | 13.128        | 136.660         | 284.941      | 93.81  | 93.82    |
| 2                   | 15.022        | 9.011           | 18.760       | 6.19   | 6.18     |



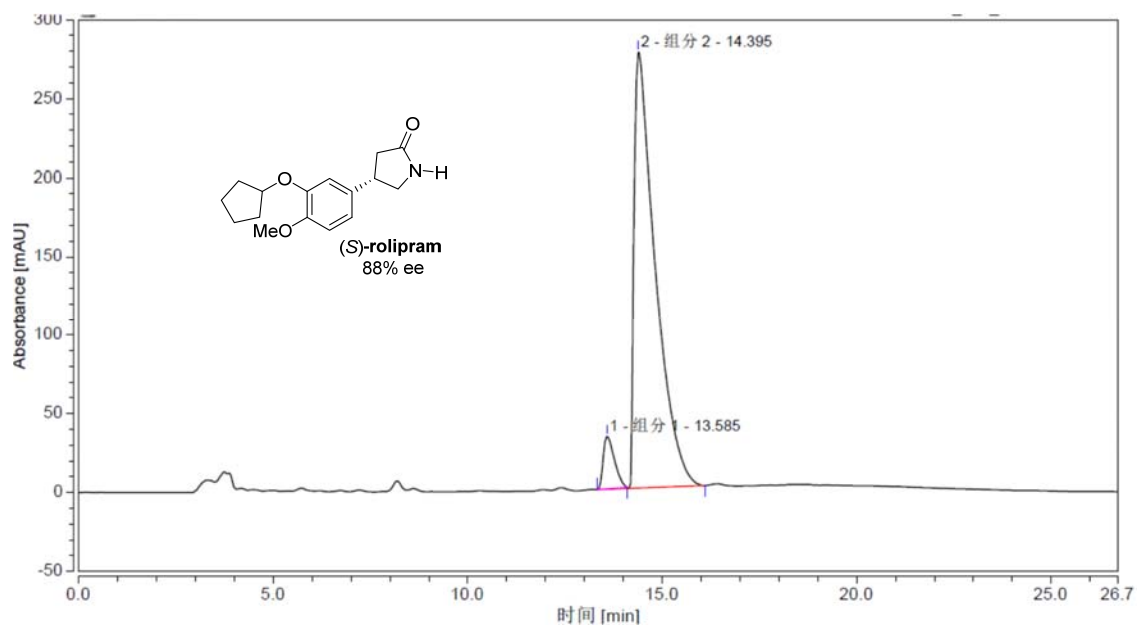

| Area Percent Report |               |                 |              |        |          |
|---------------------|---------------|-----------------|--------------|--------|----------|
| Peak #              | RetTime [min] | Area [mAU *min] | Height [mAU] | Area % | Height % |
| 1                   | 13.585        | 11.095          | 33.289       | 5.97   | 10.73    |
| 2                   | 14.395        | 174.899         | 276.859      | 94.03  | 89.27    |

# Copies of $^1\text{H}$ NMR and $^{13}\text{C}$ NMR Spectra for All New Compounds

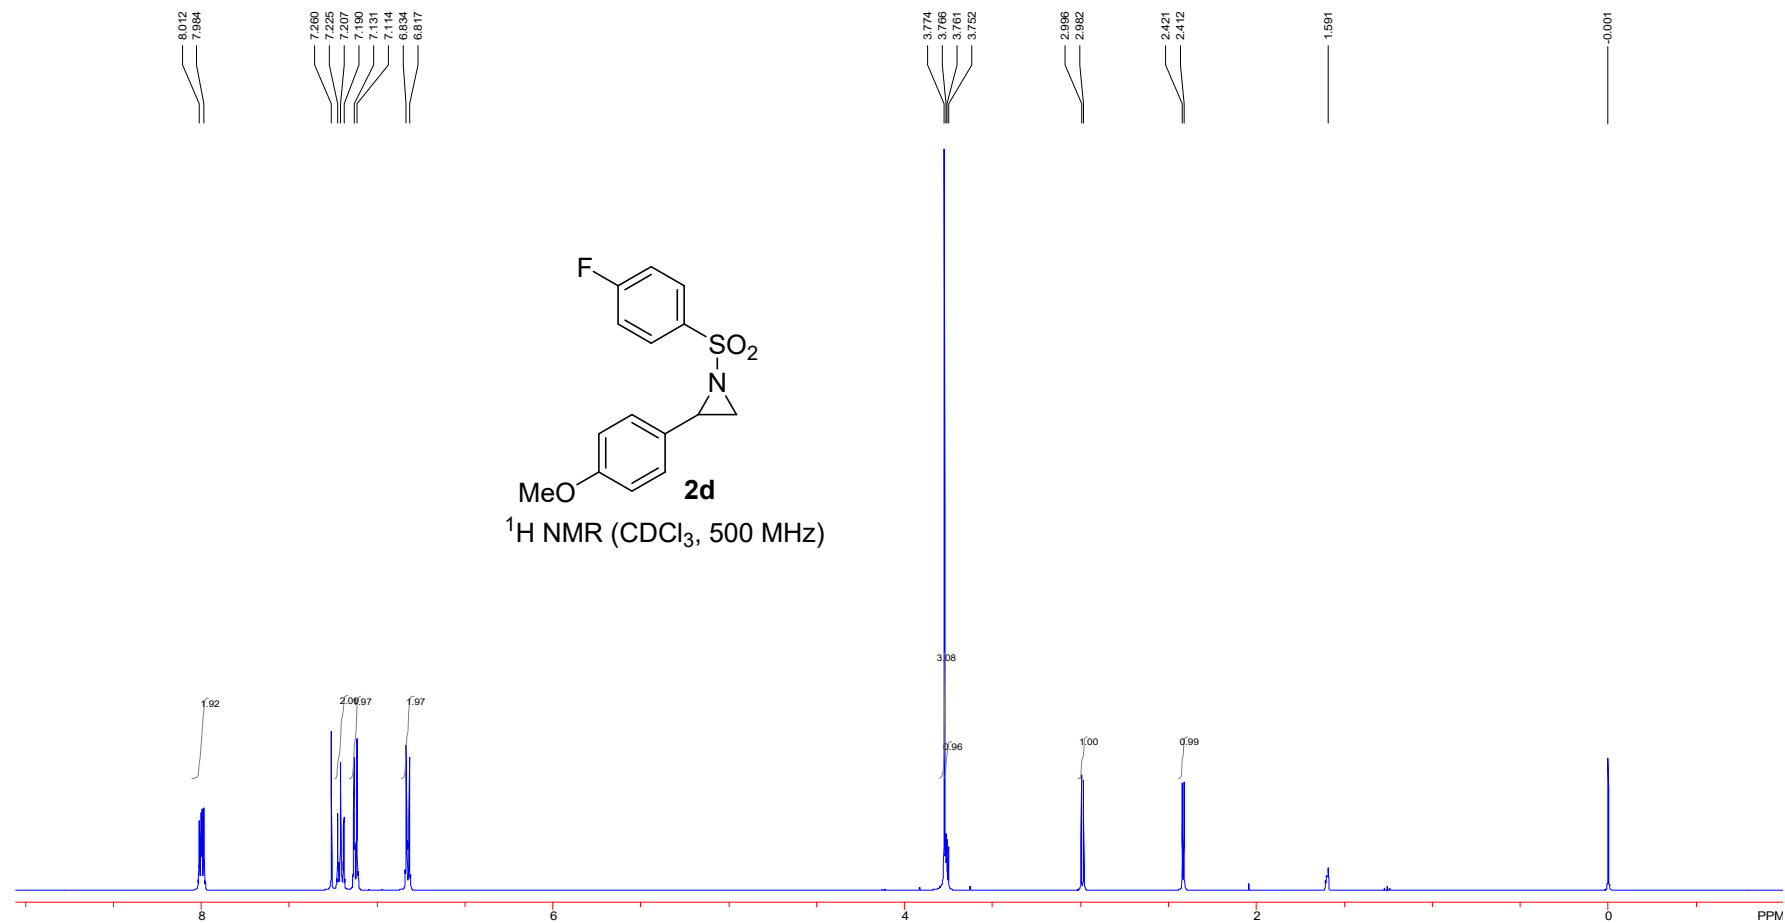

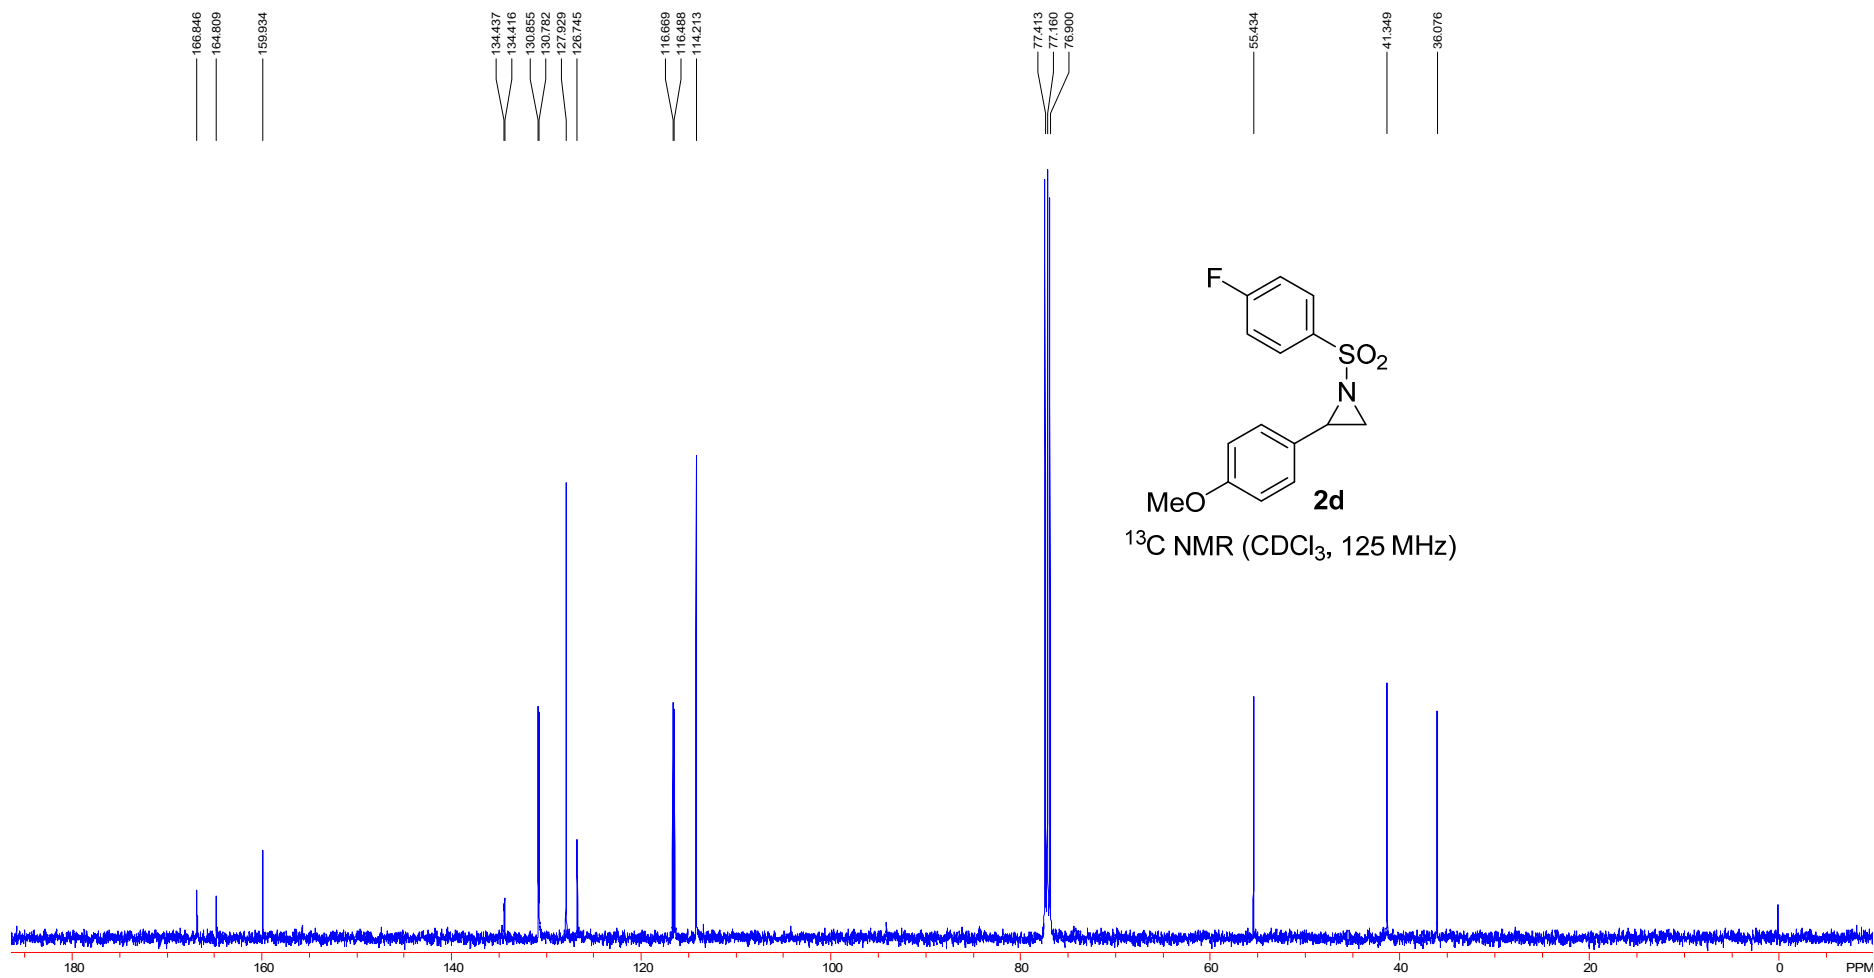

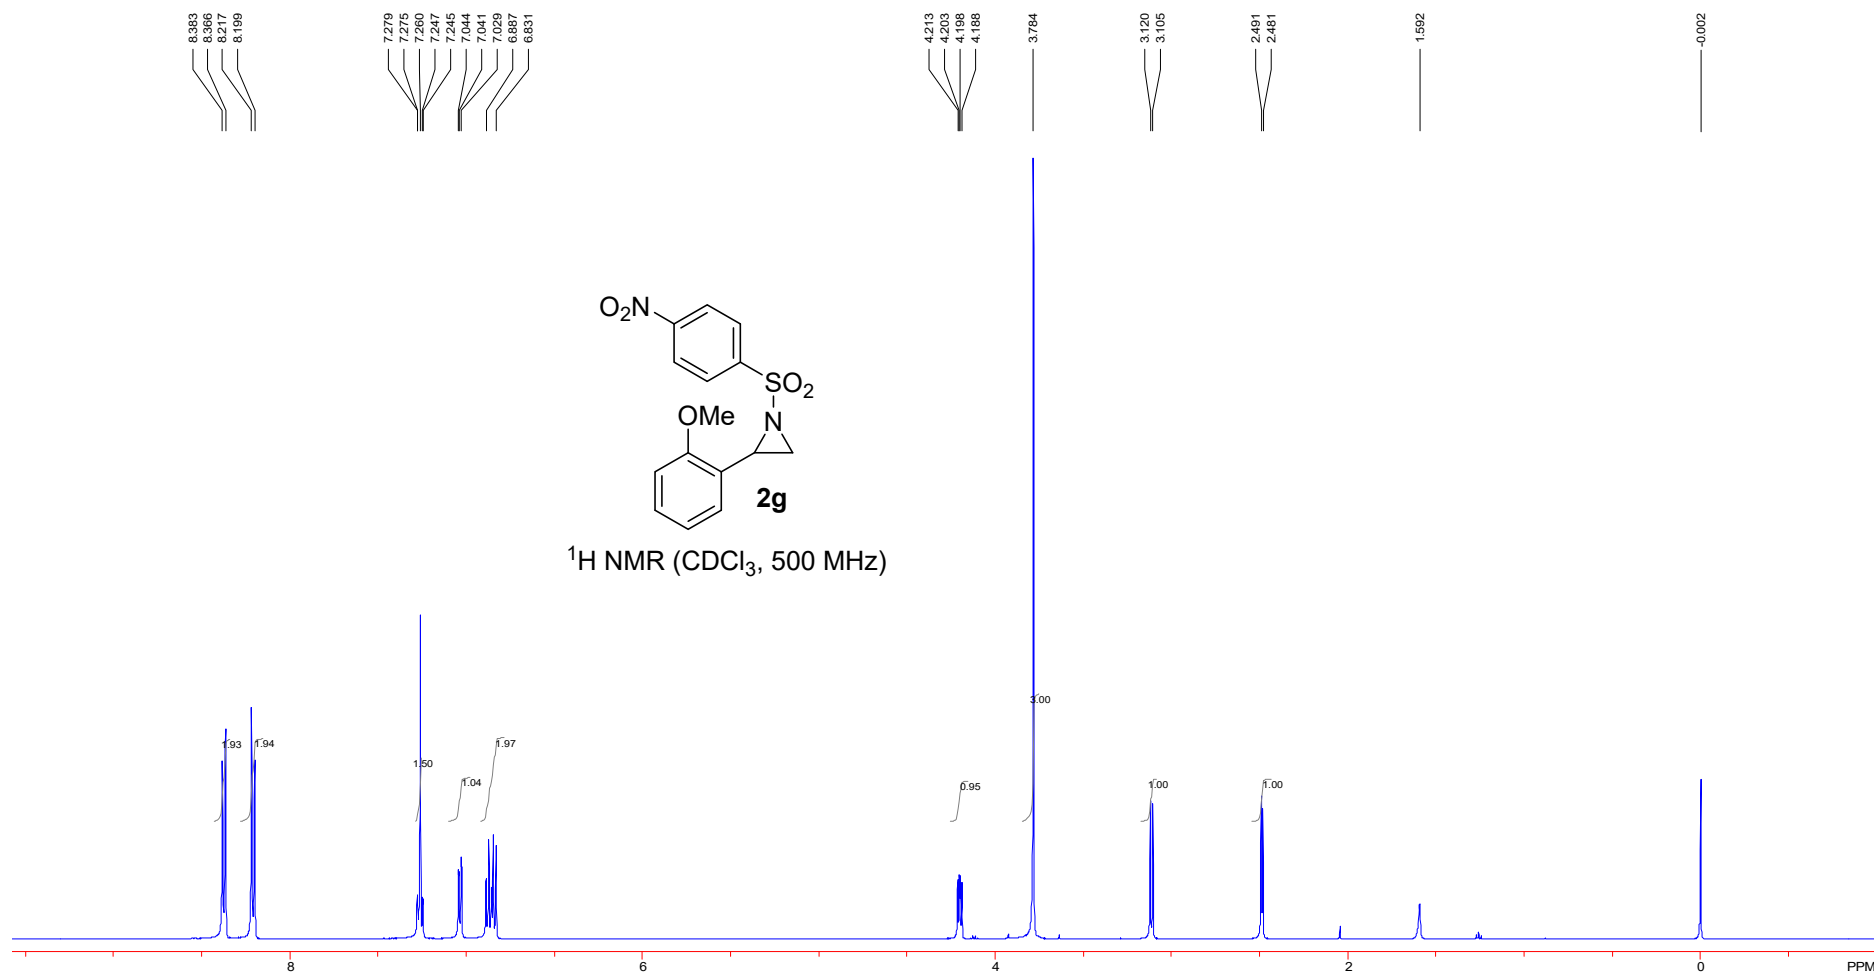

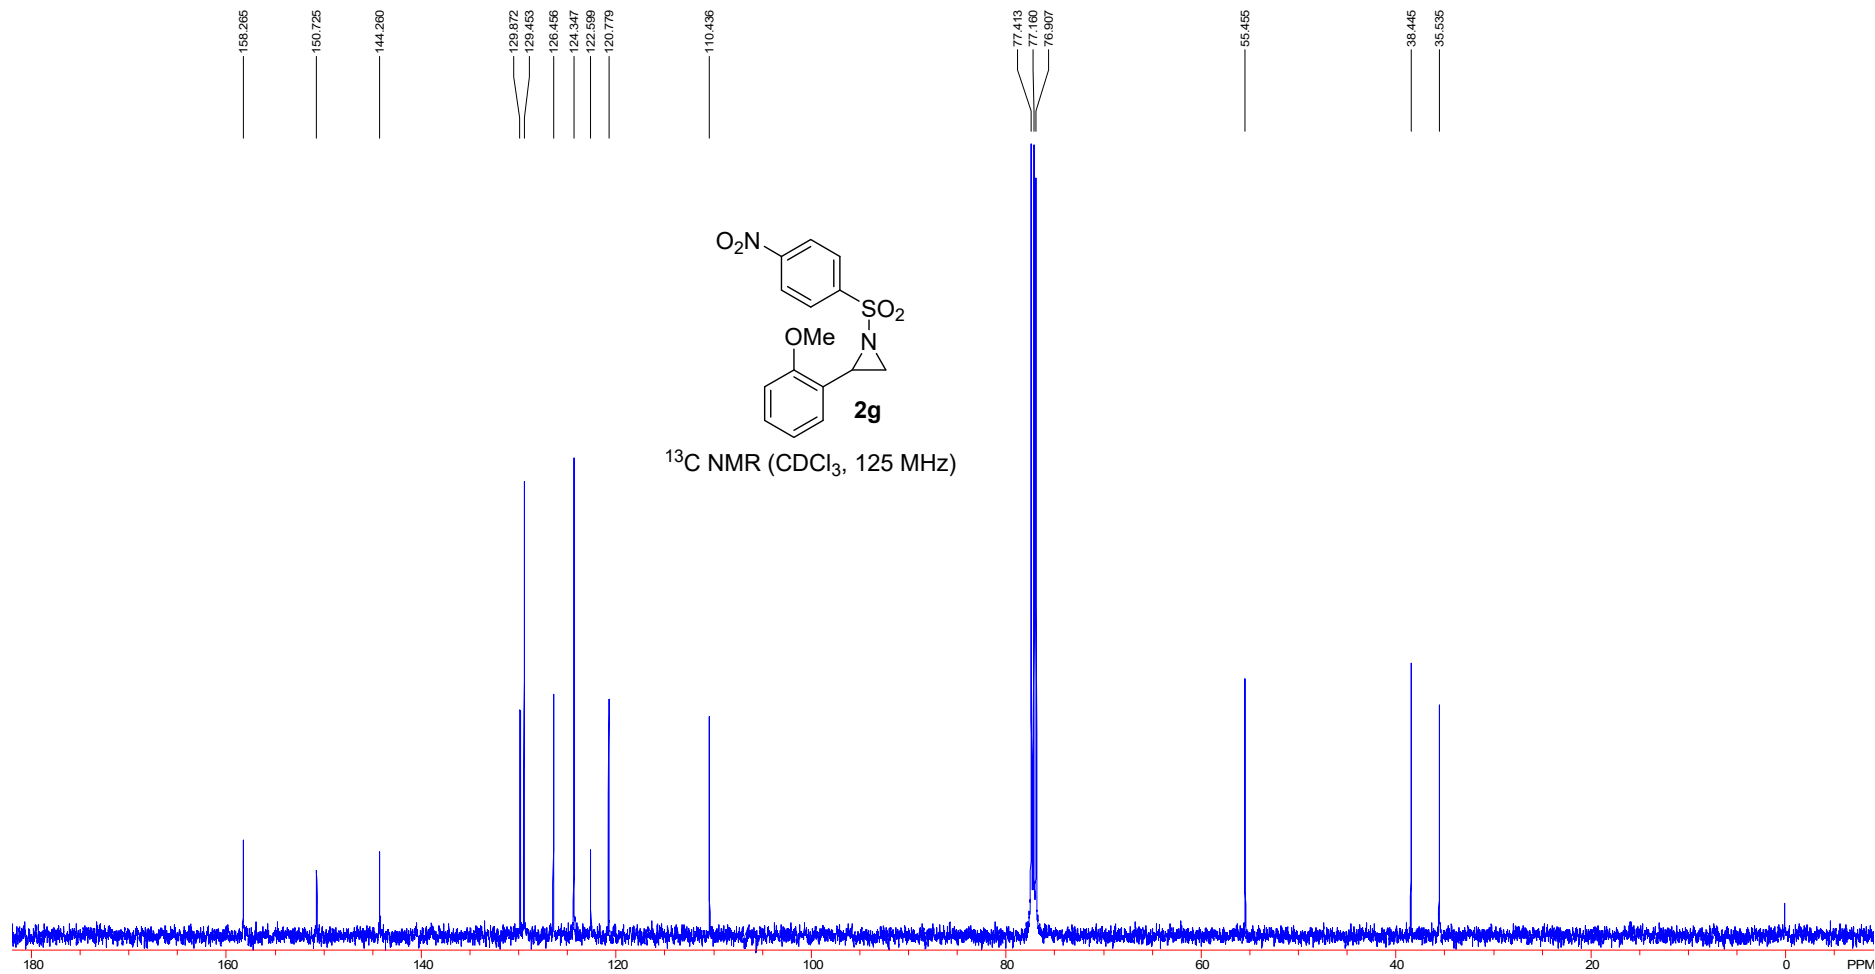

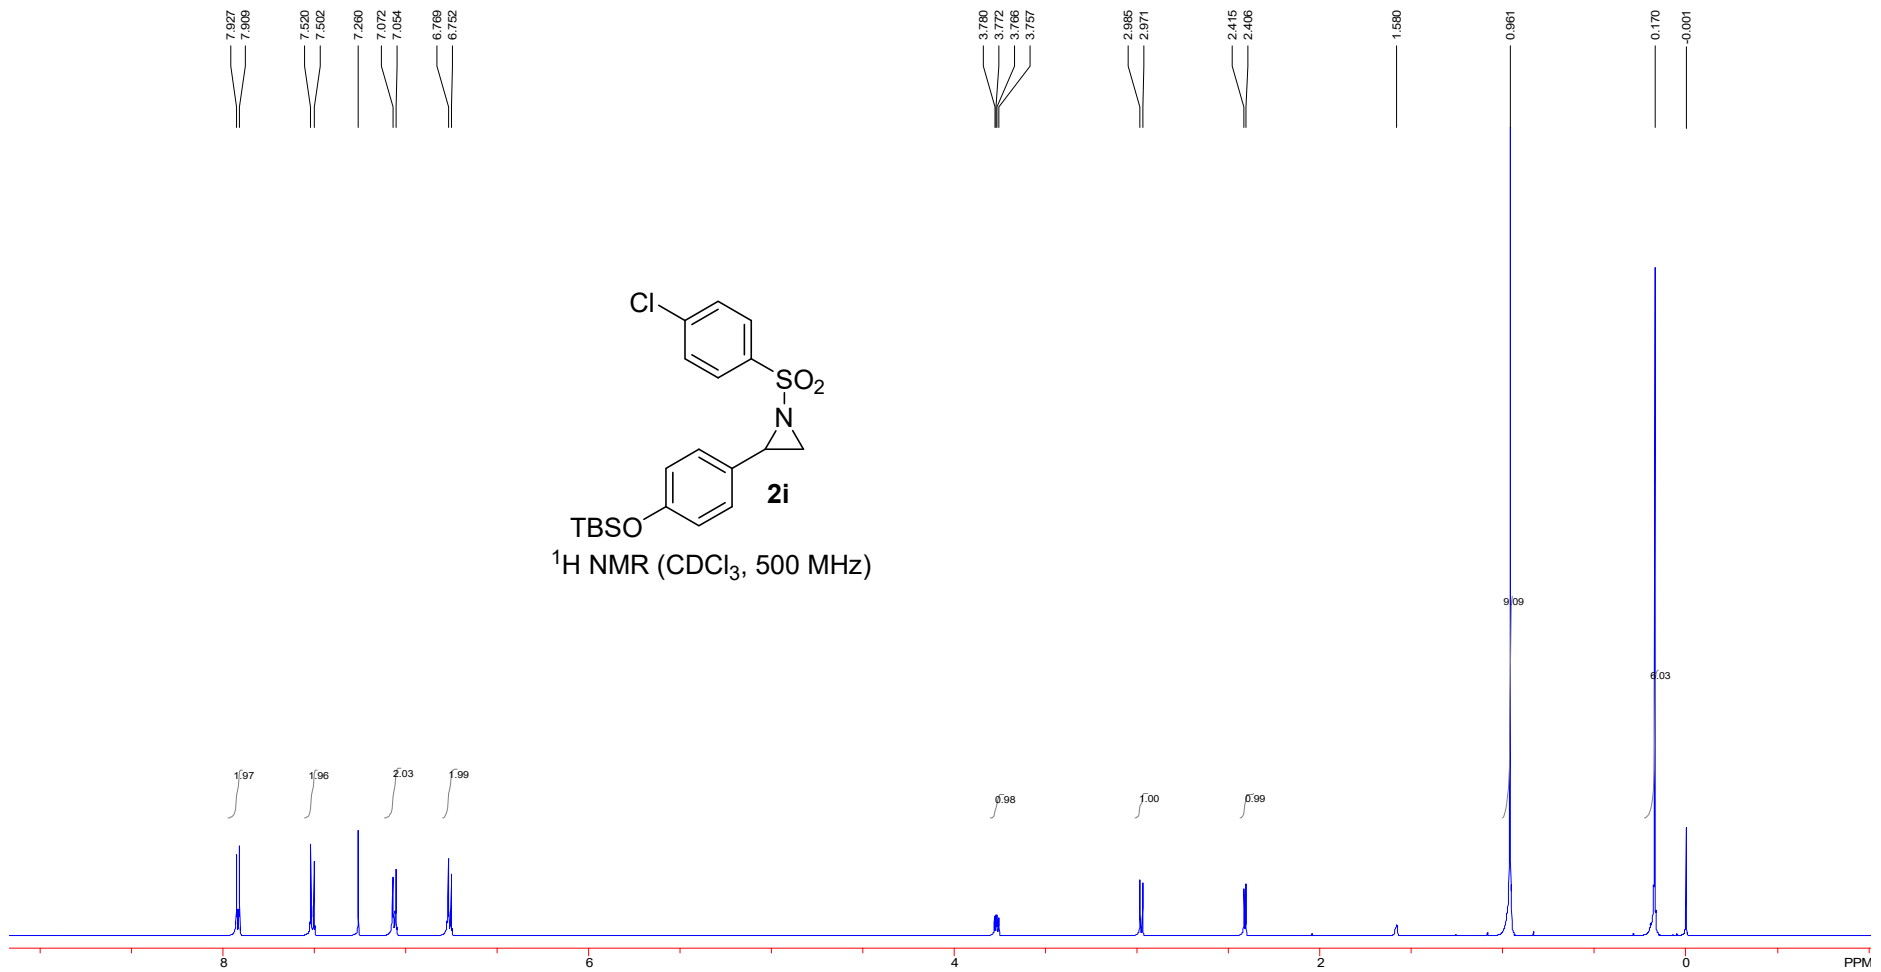

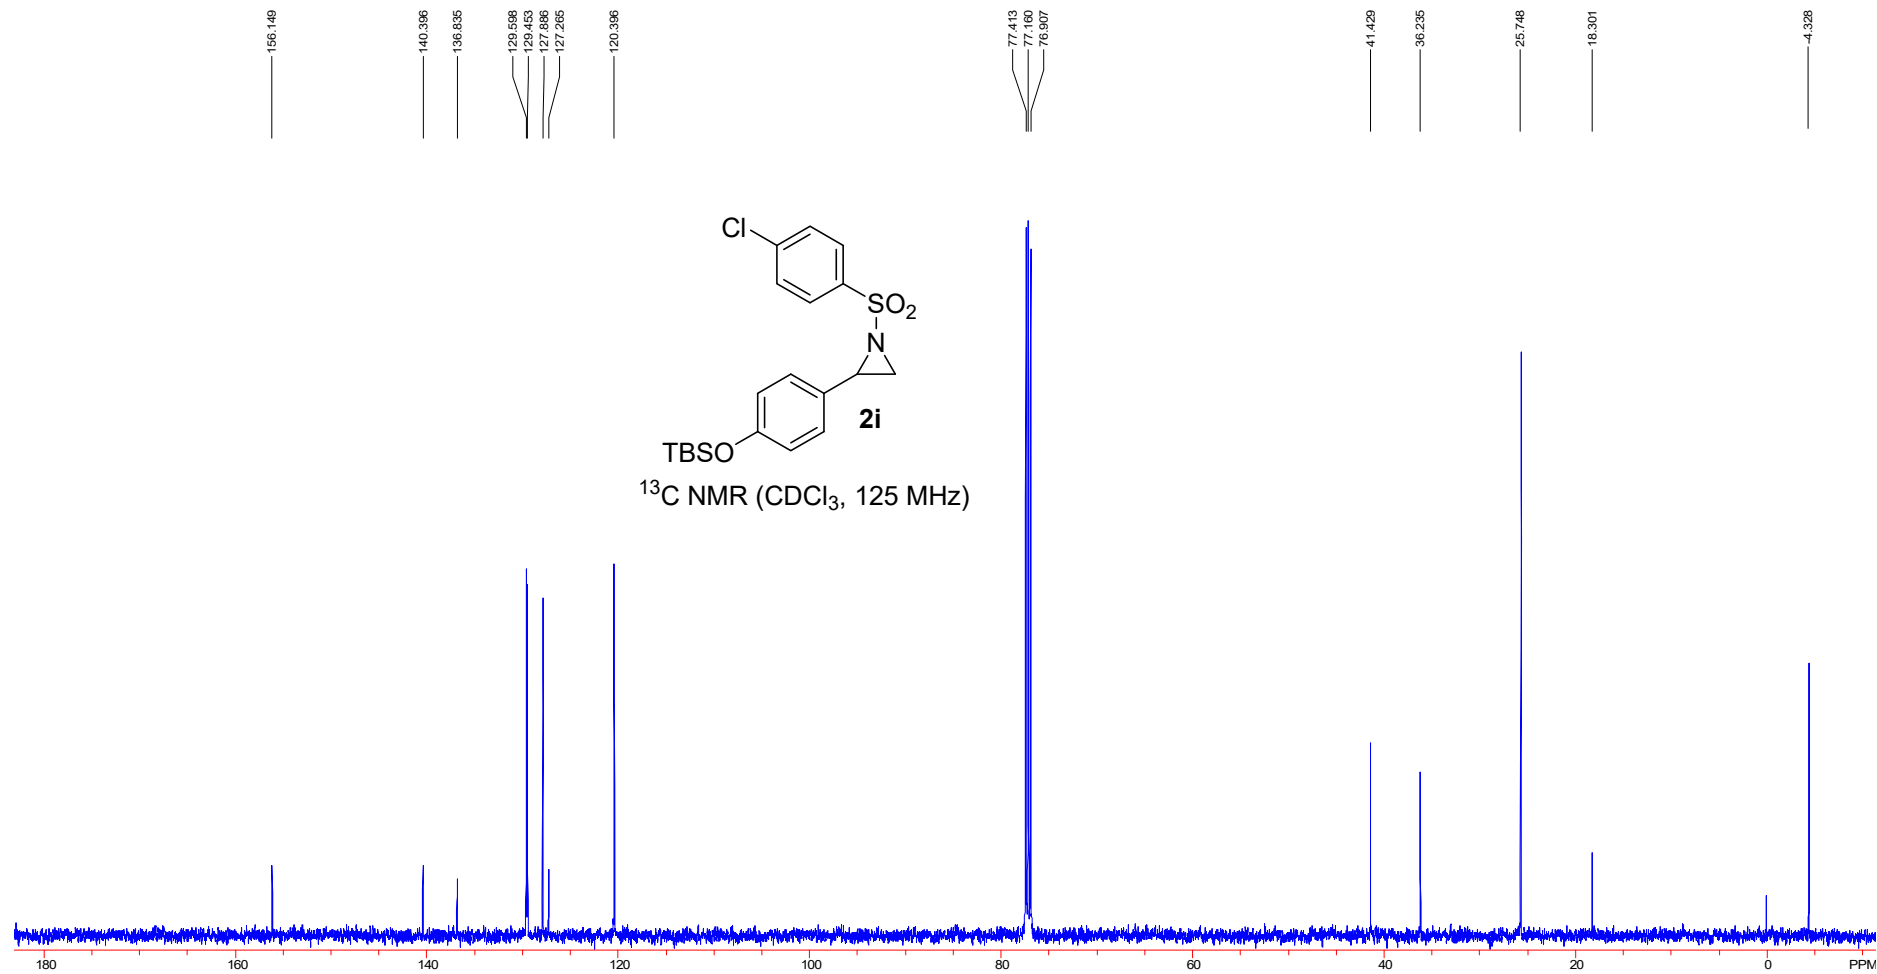

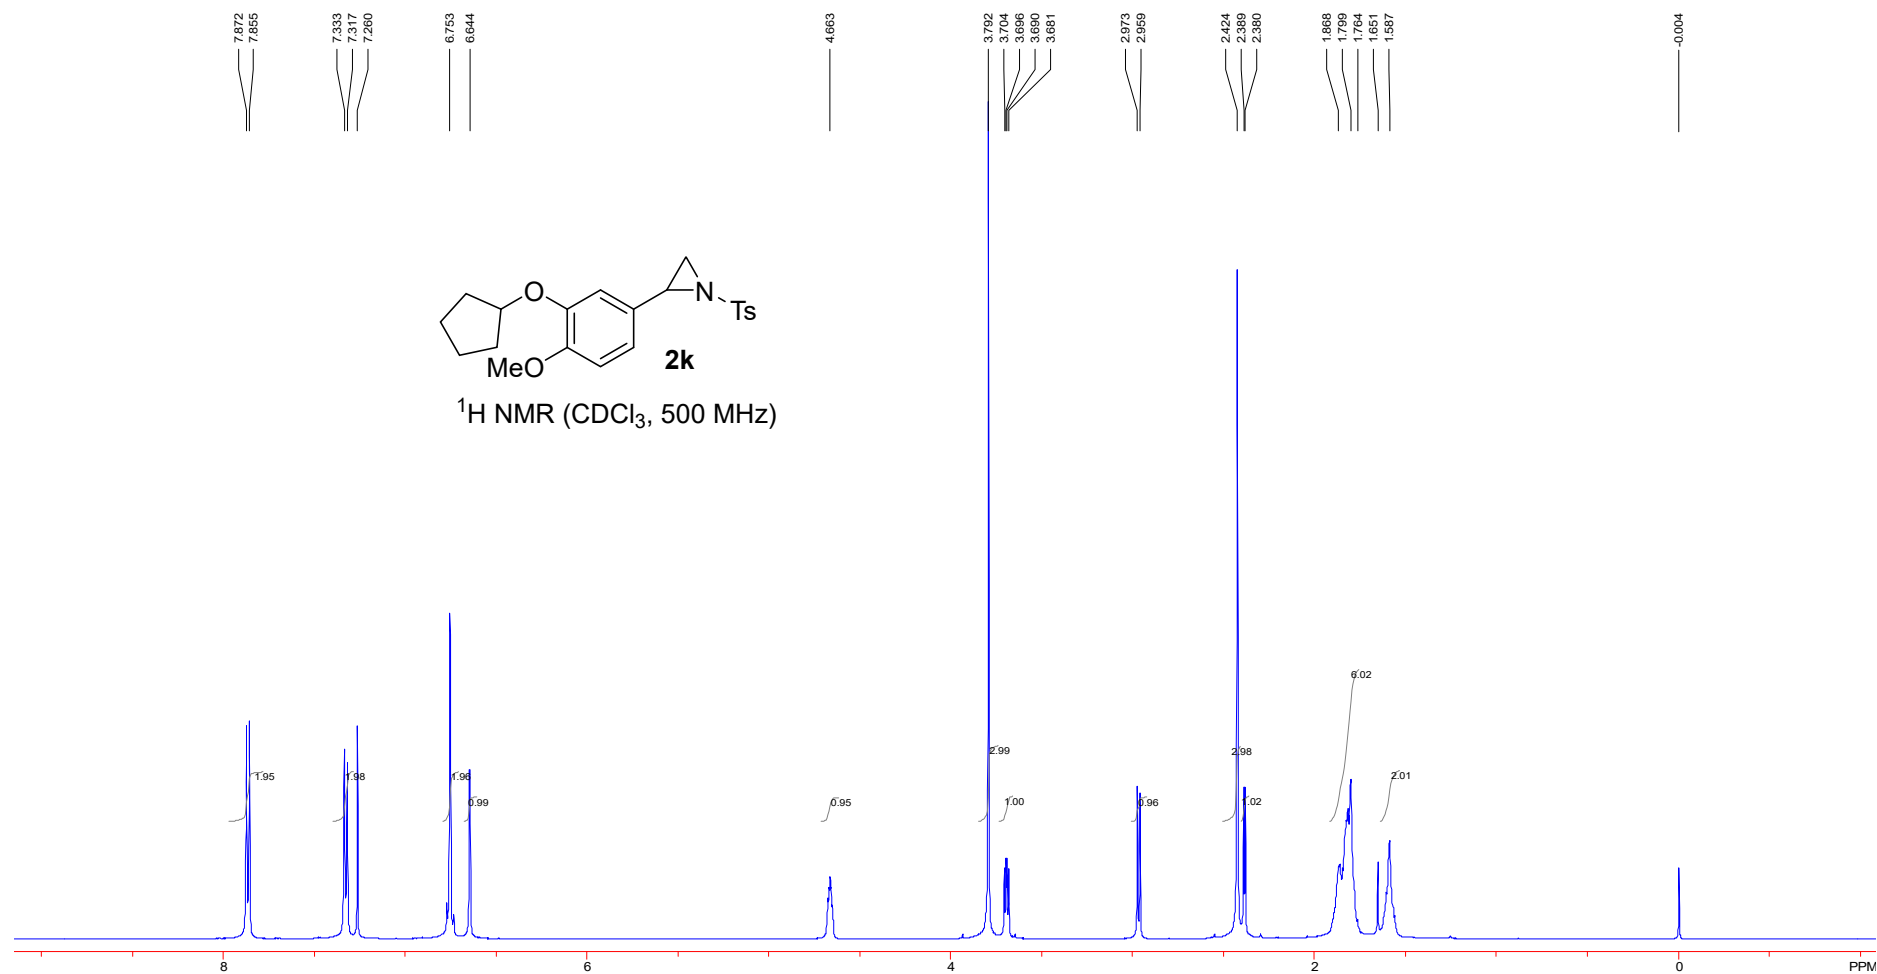



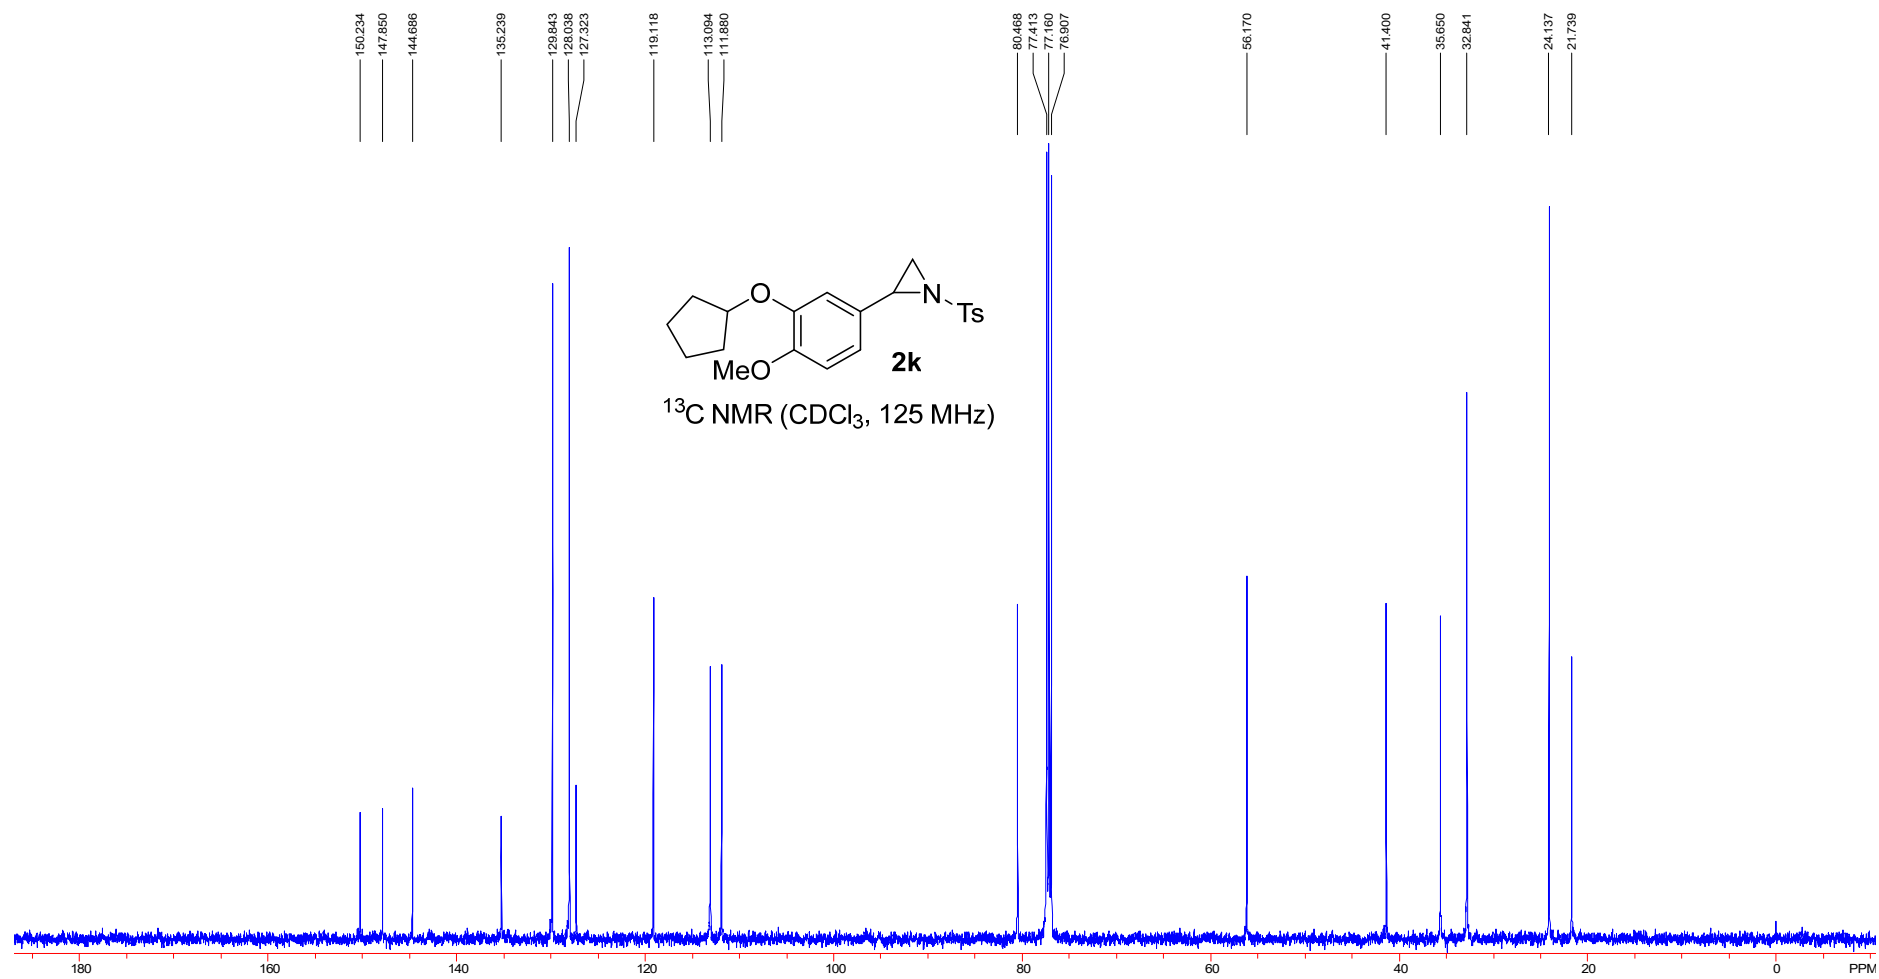

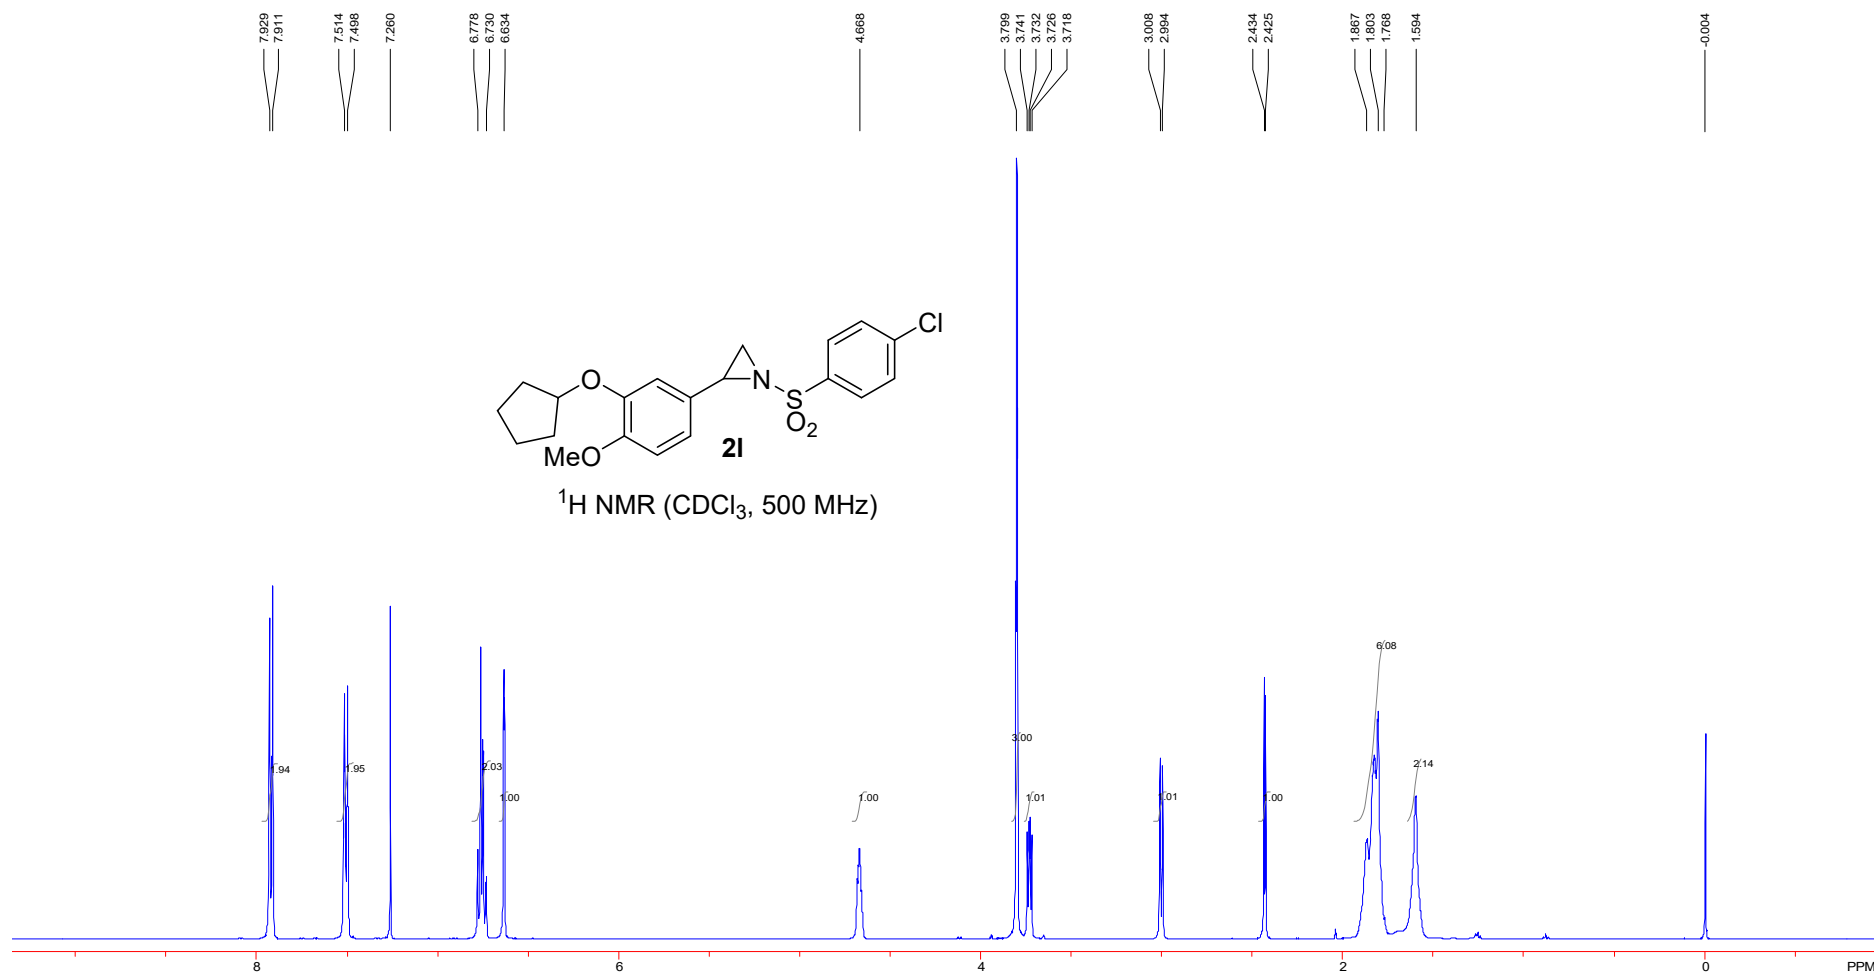

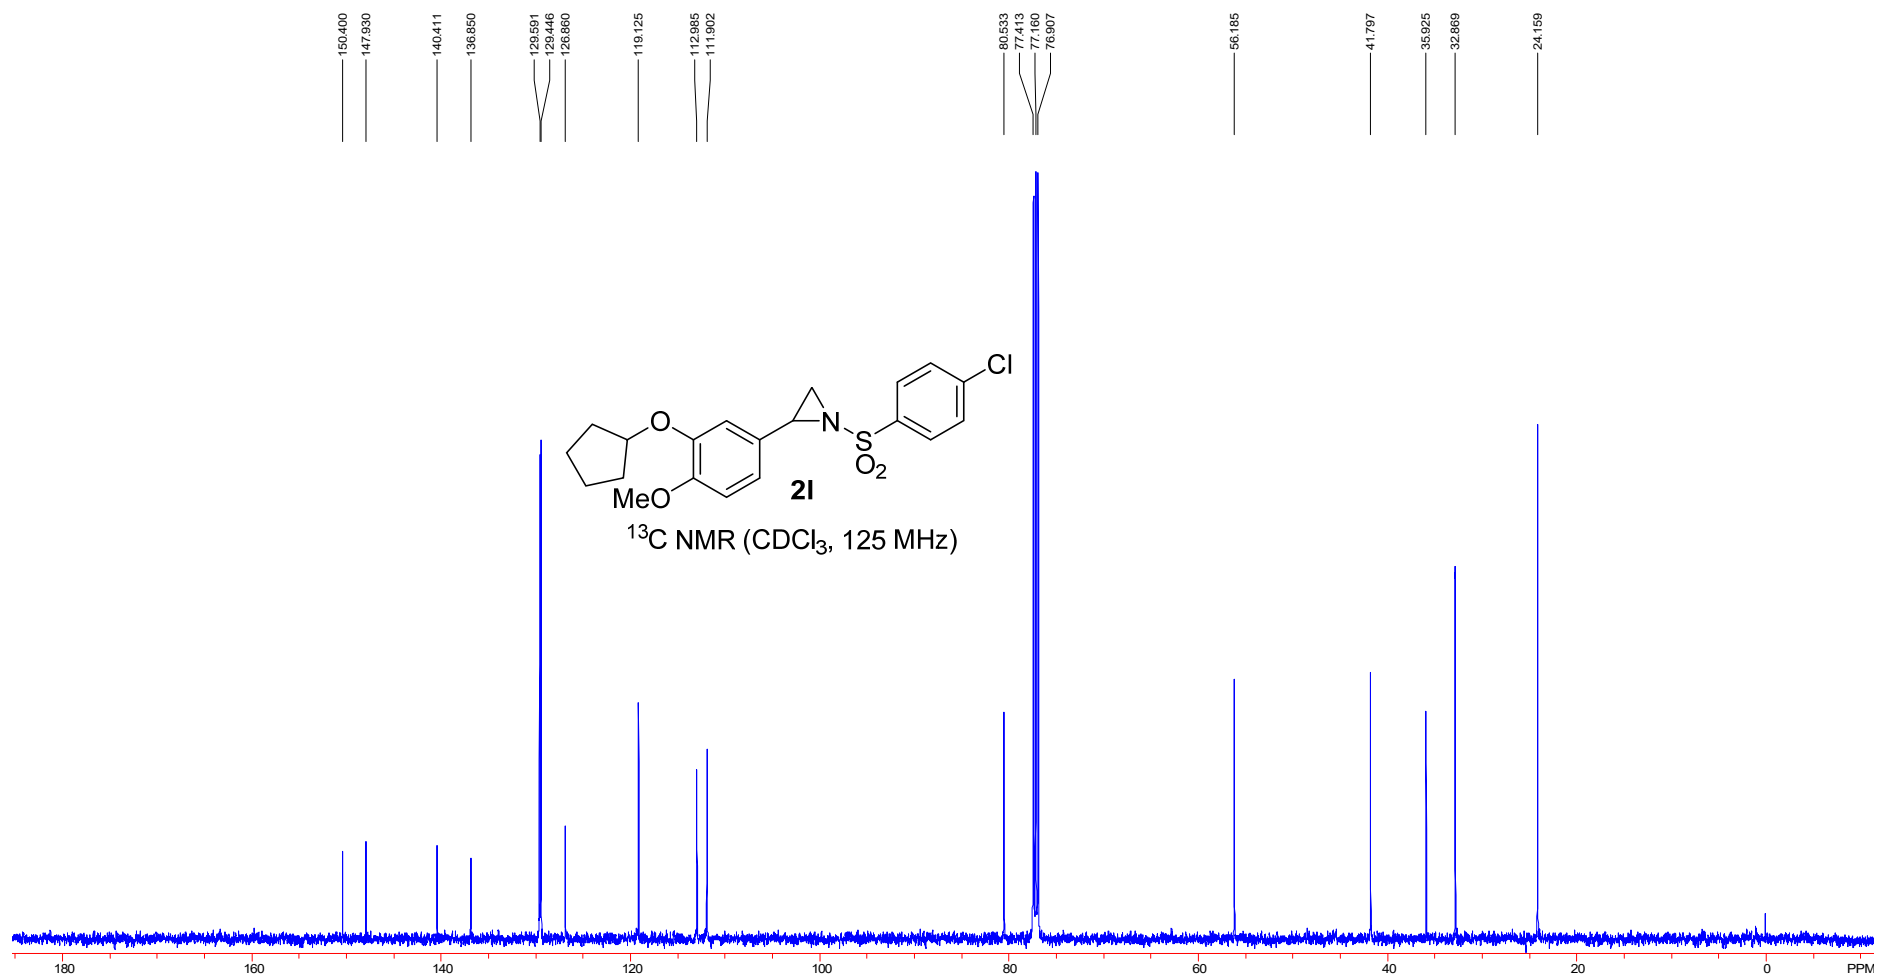

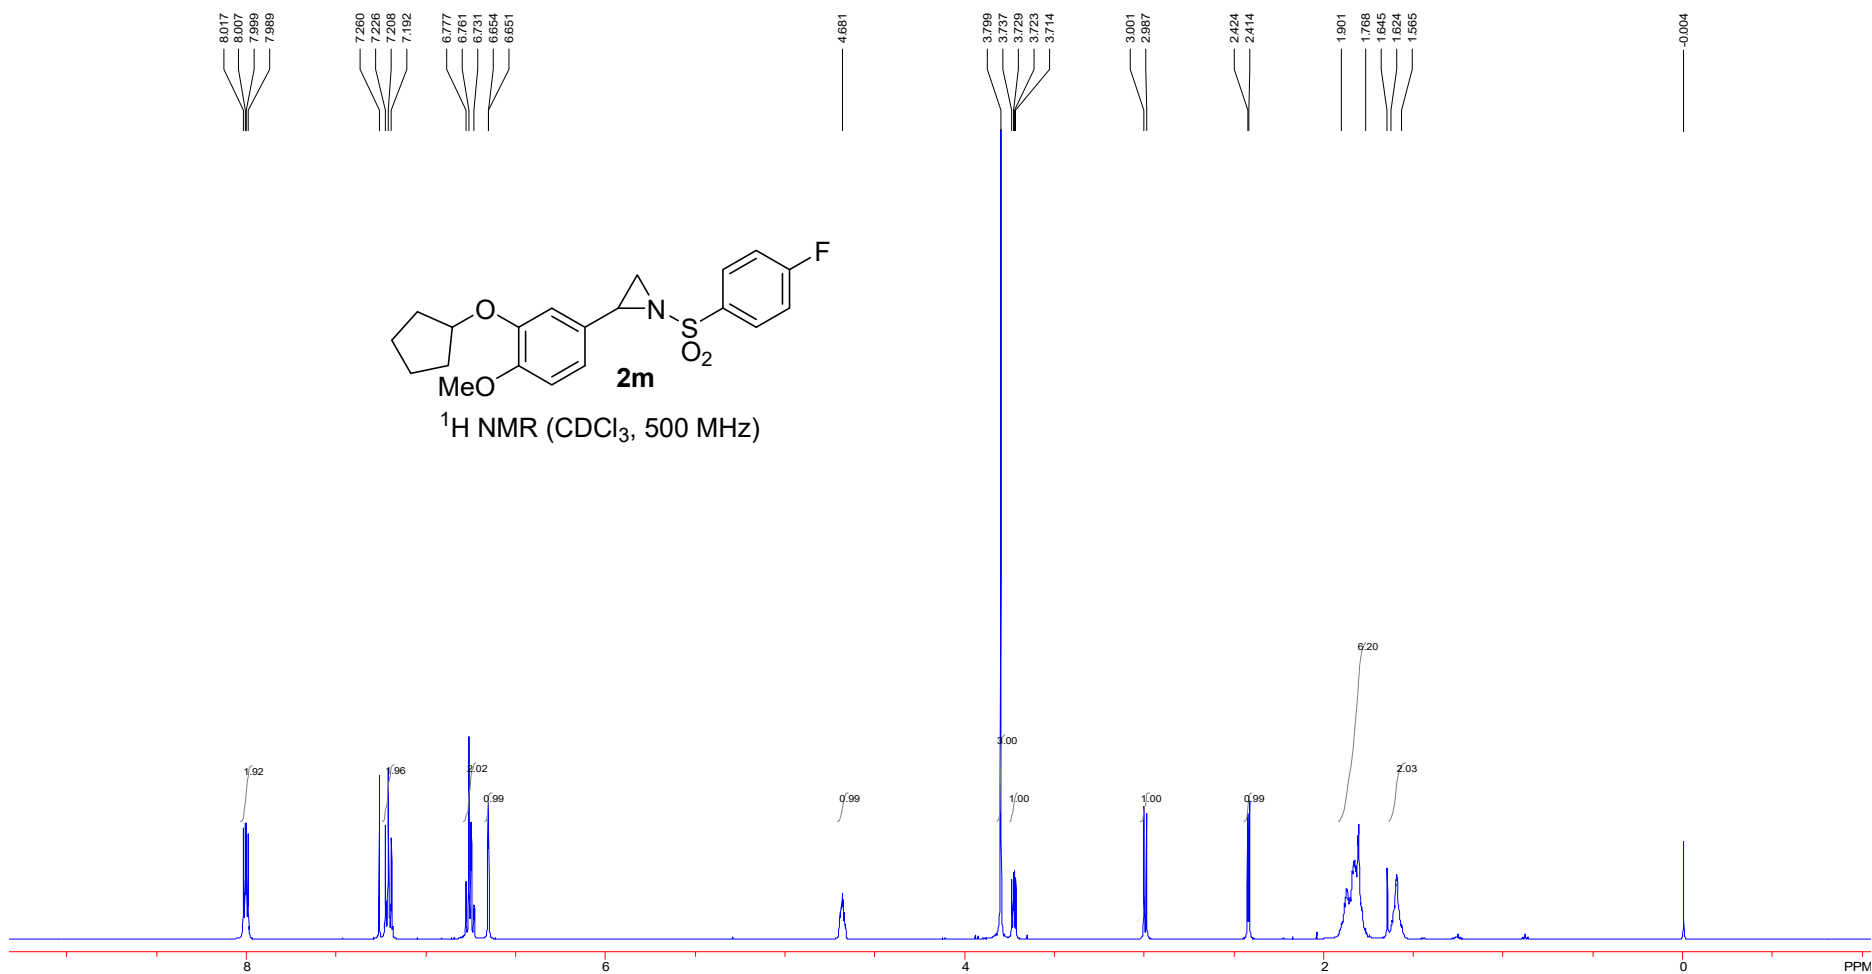

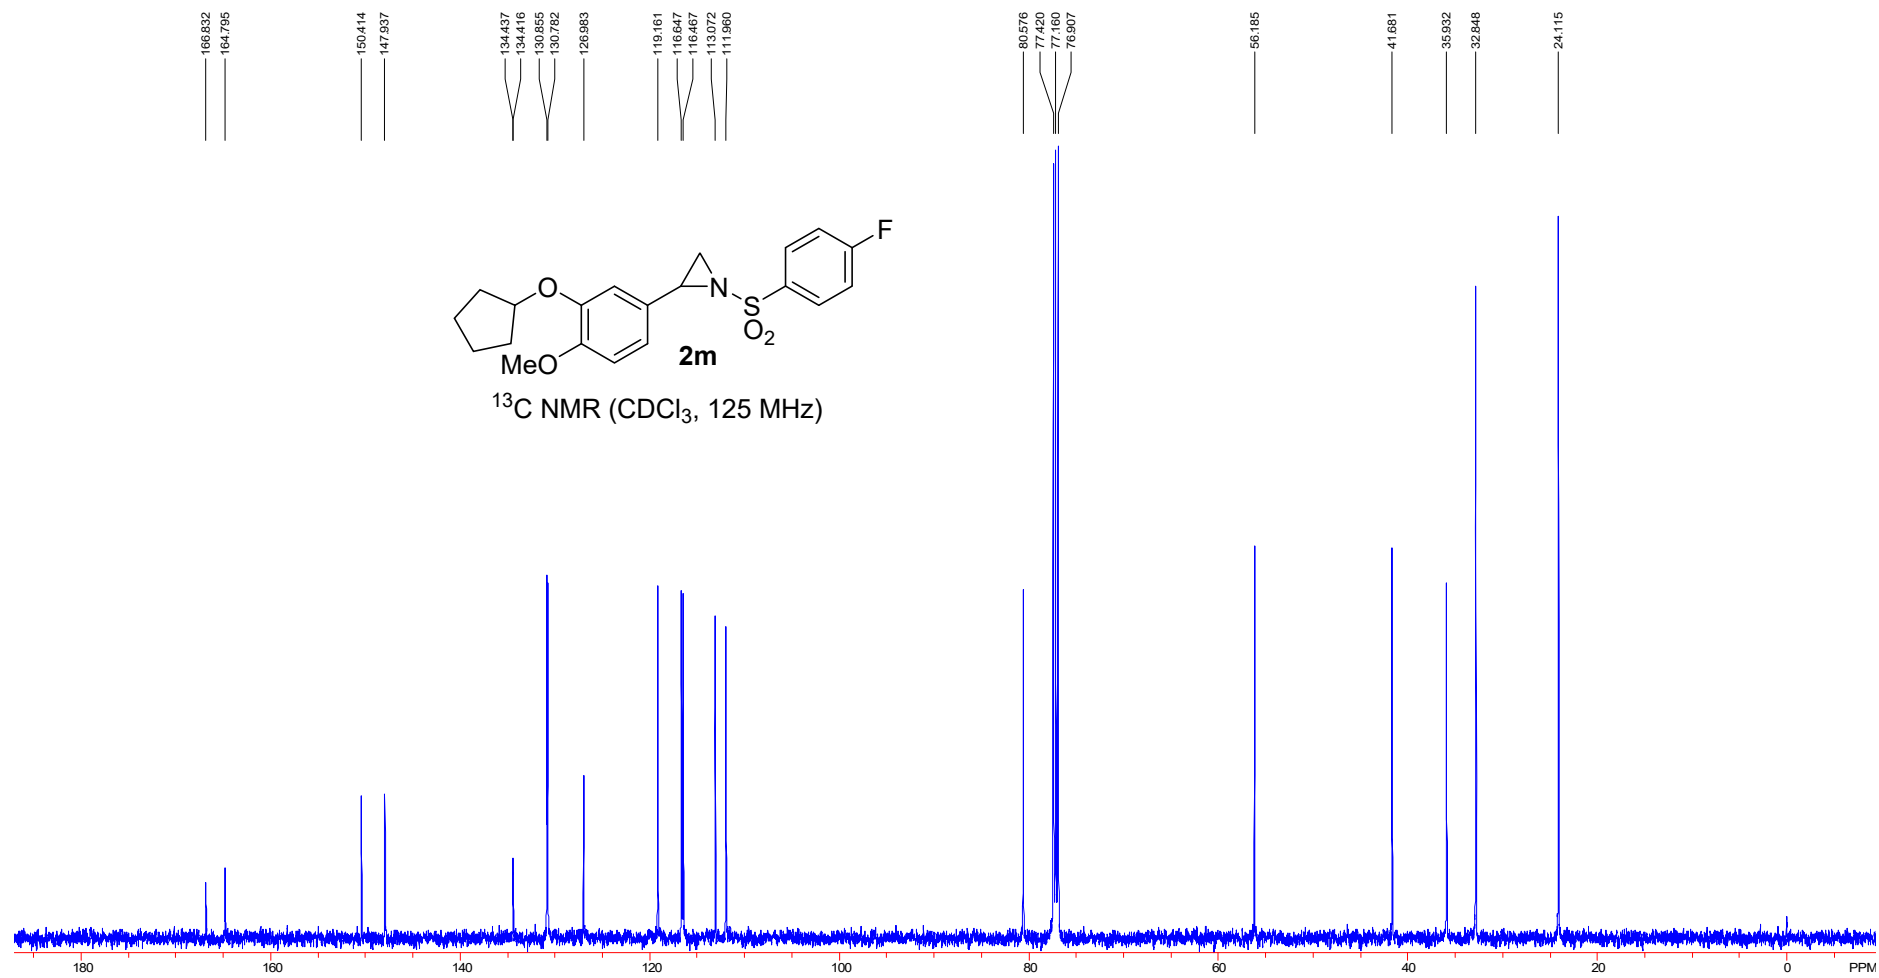

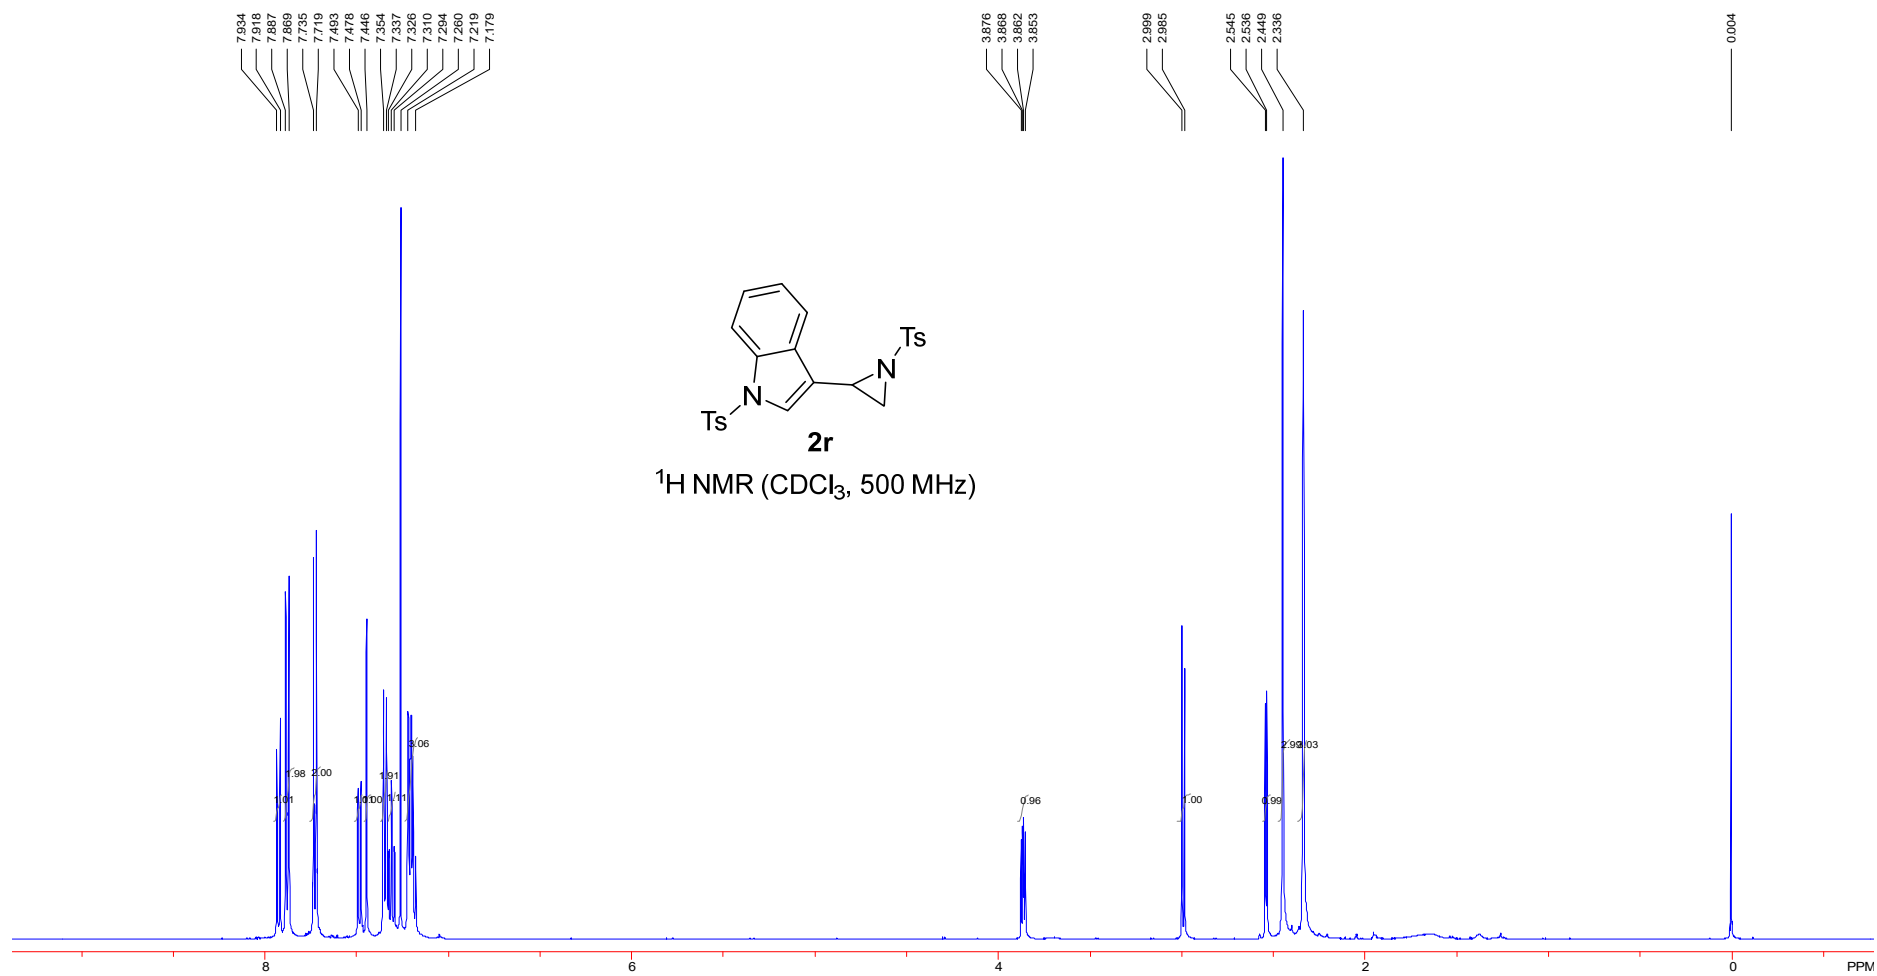

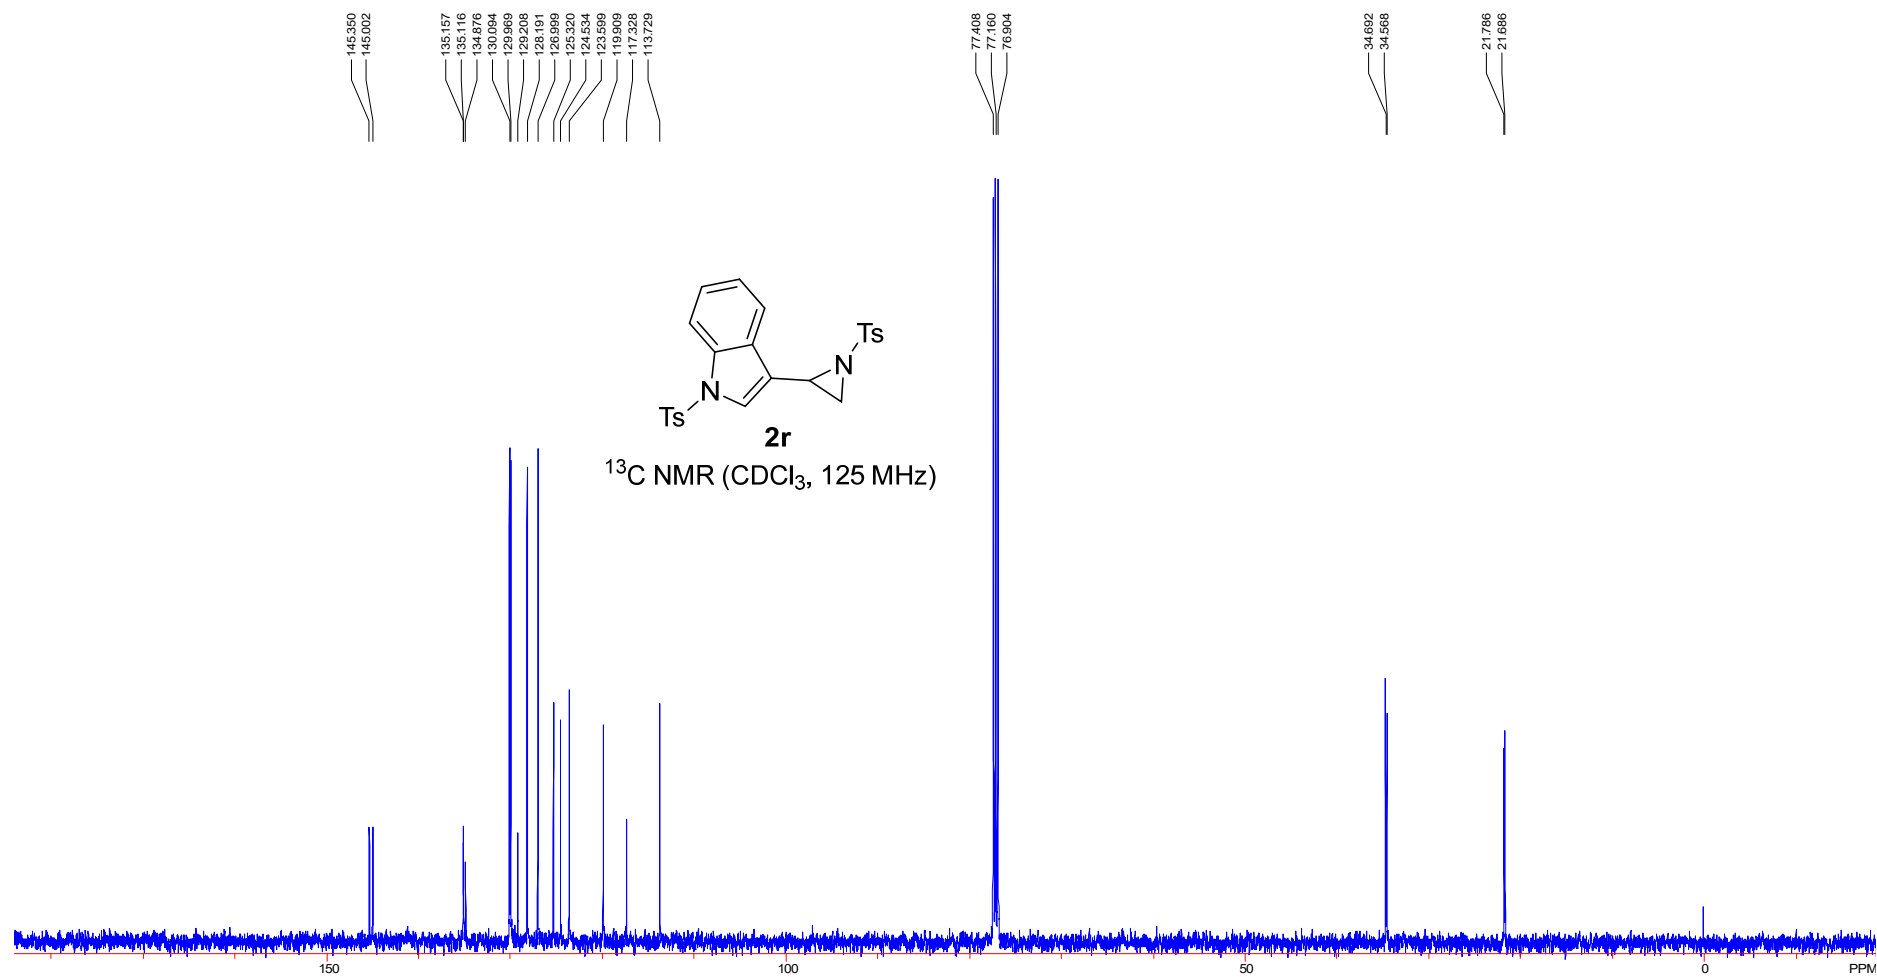

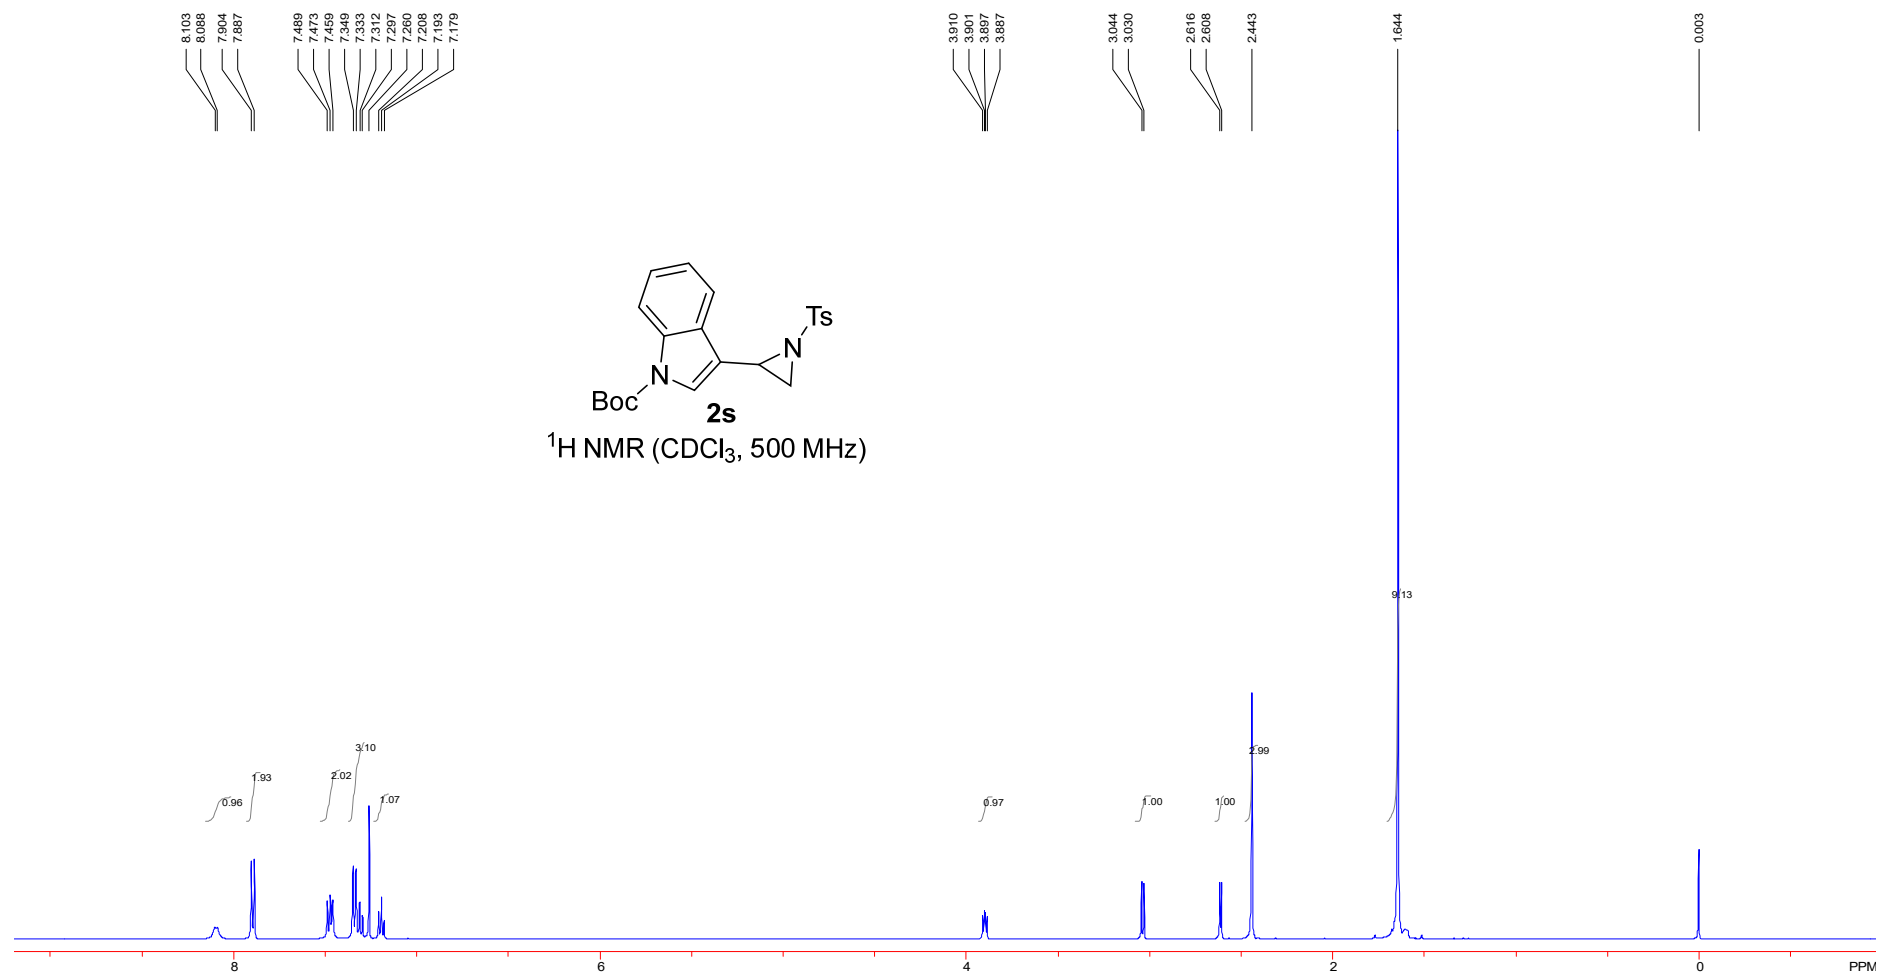



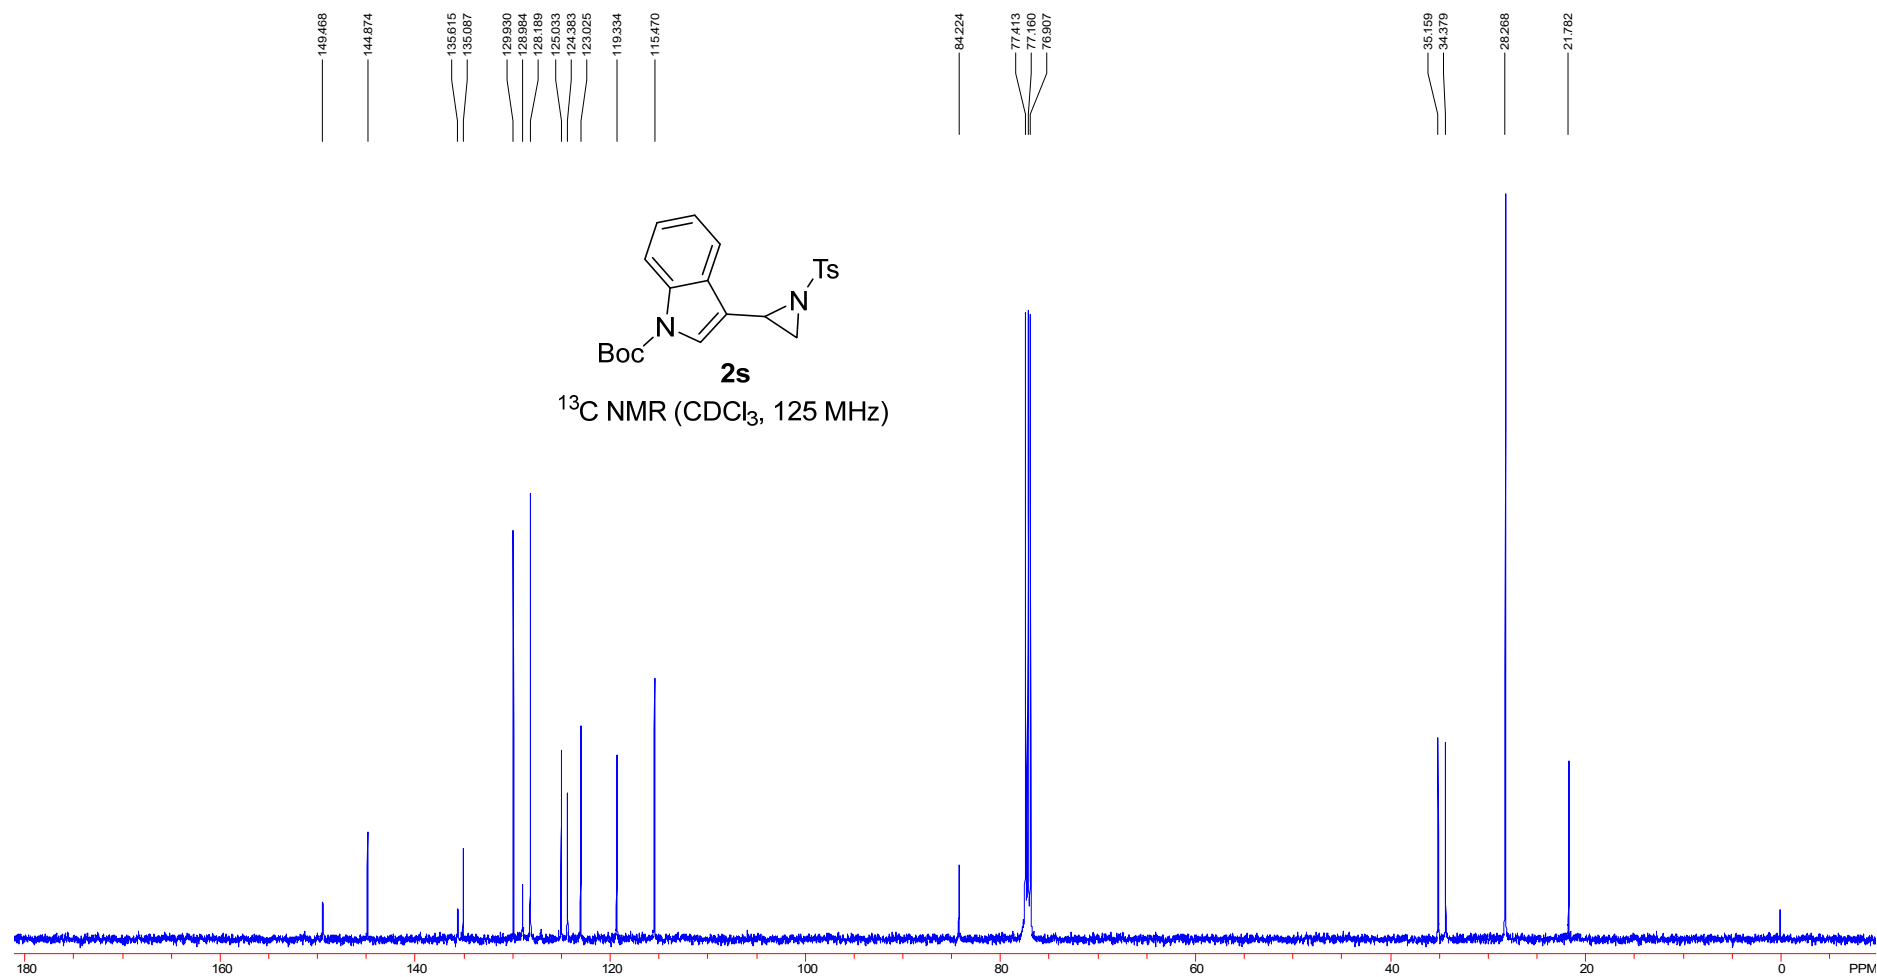

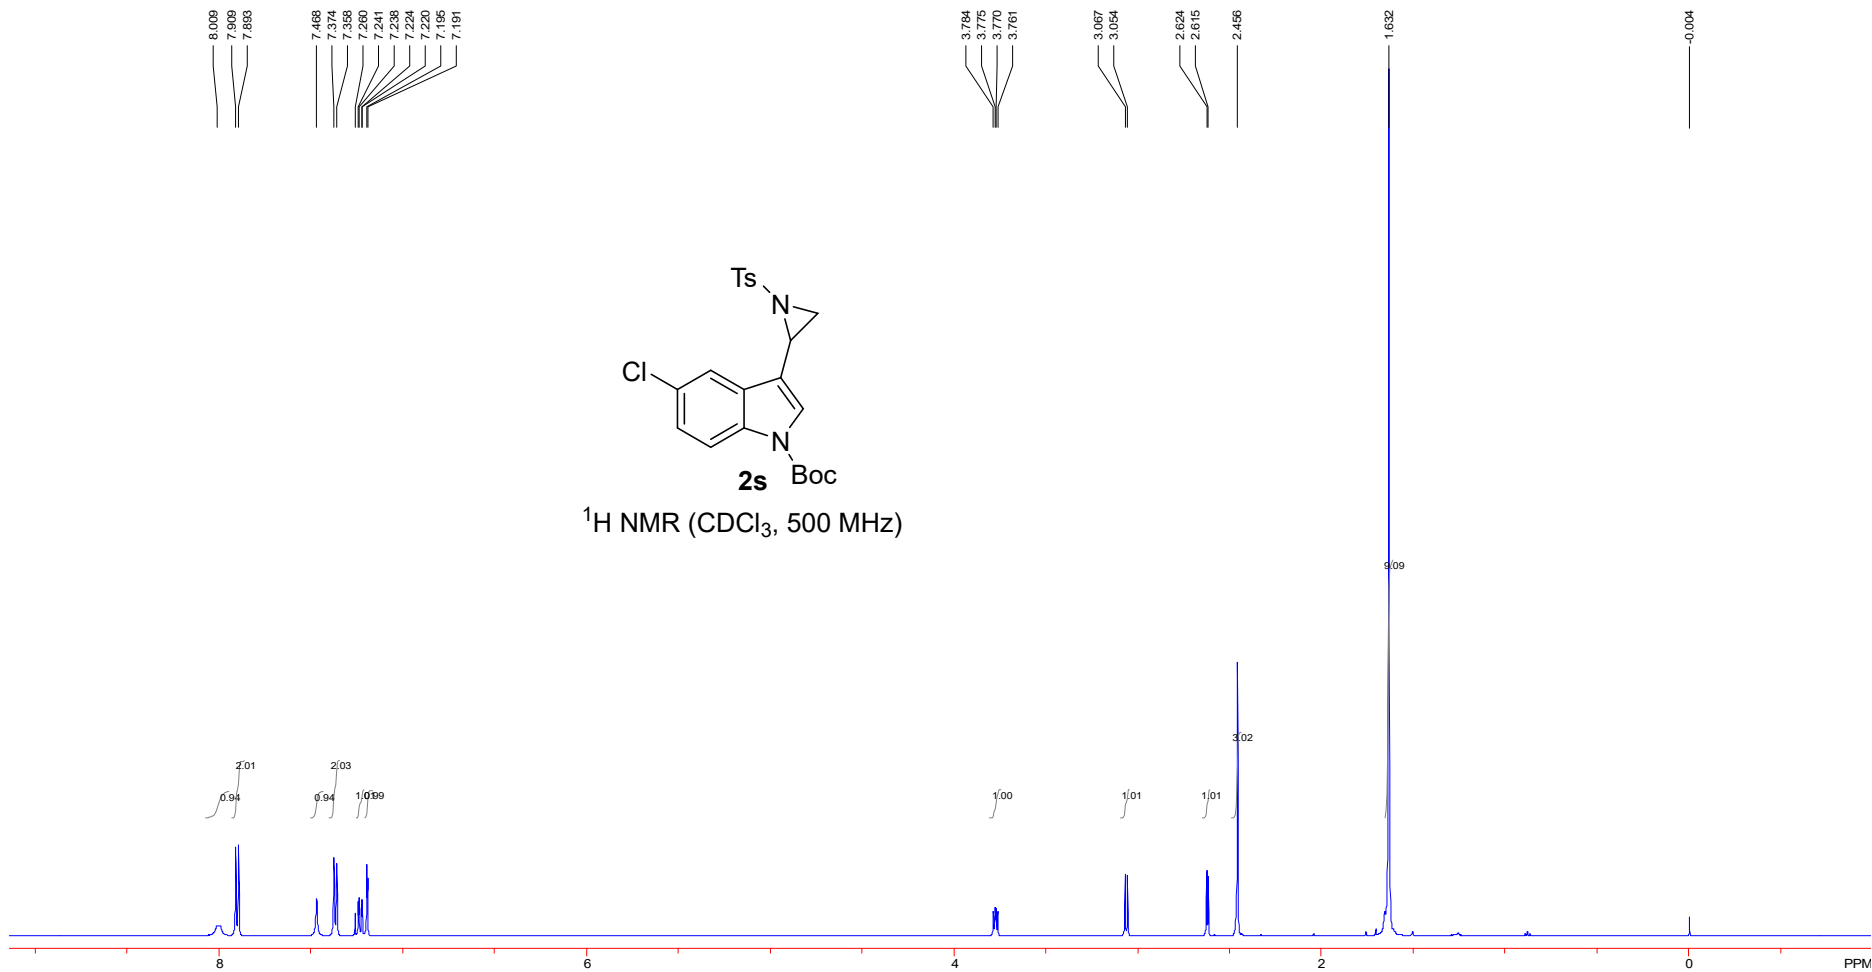

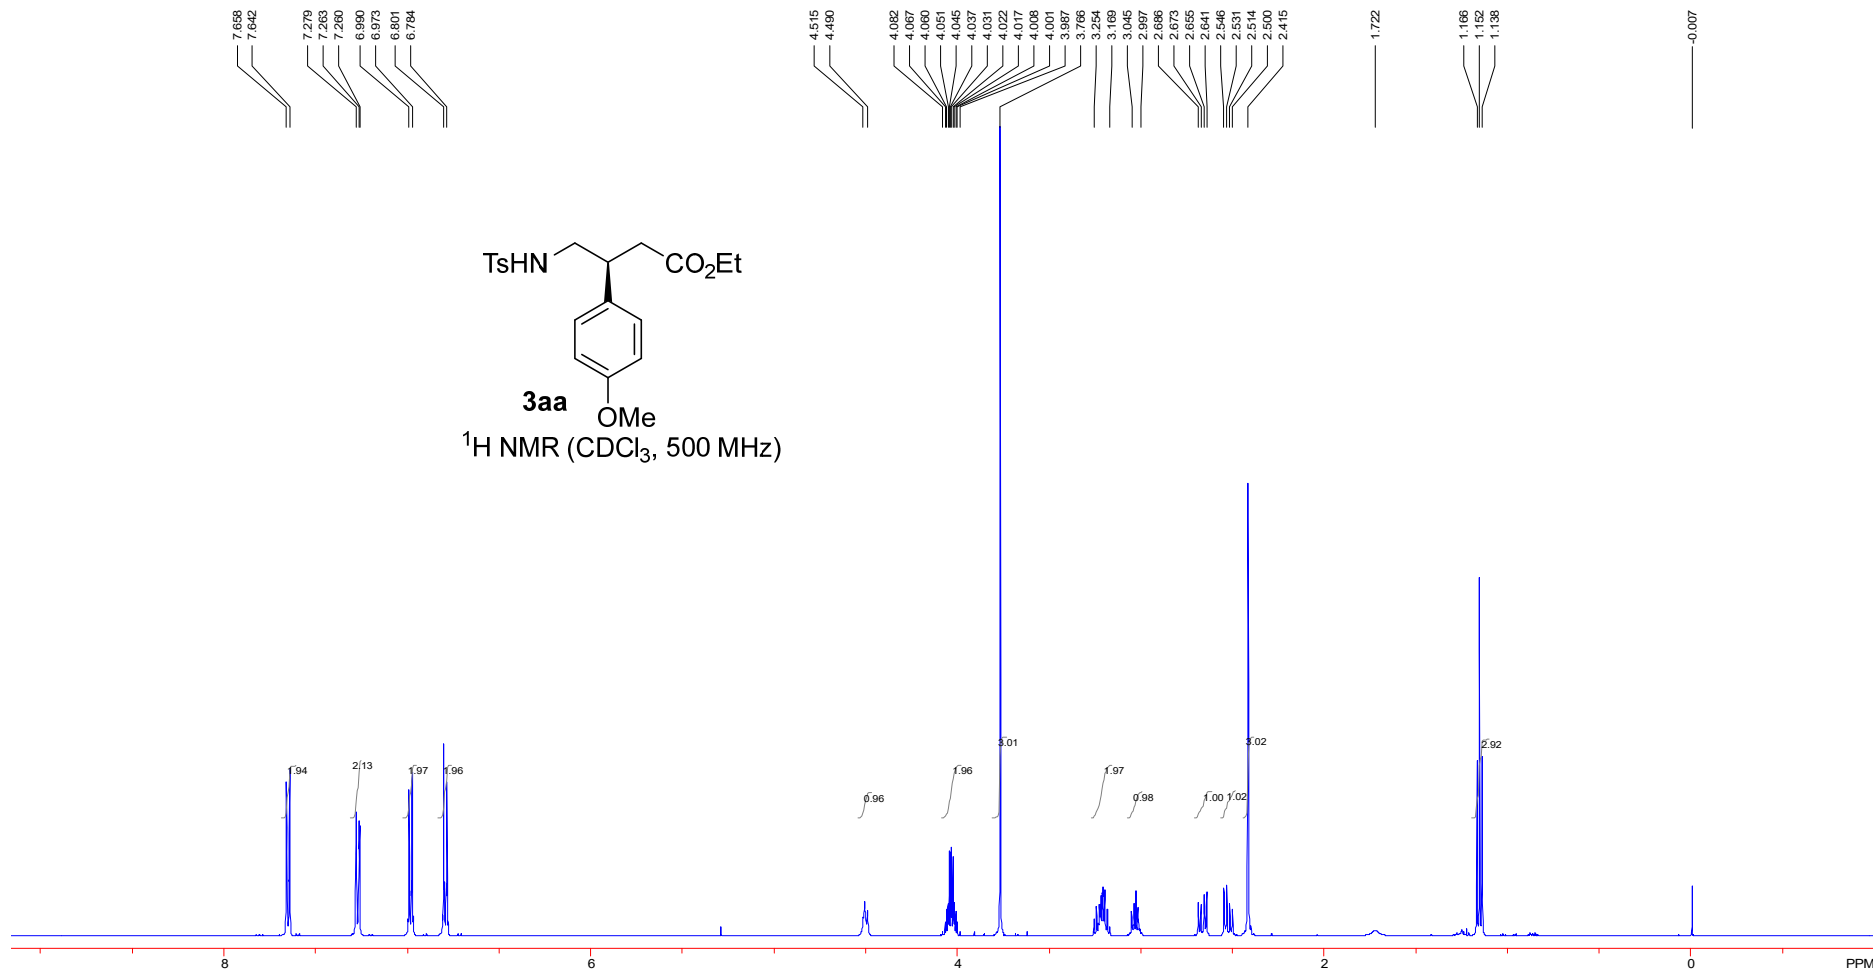

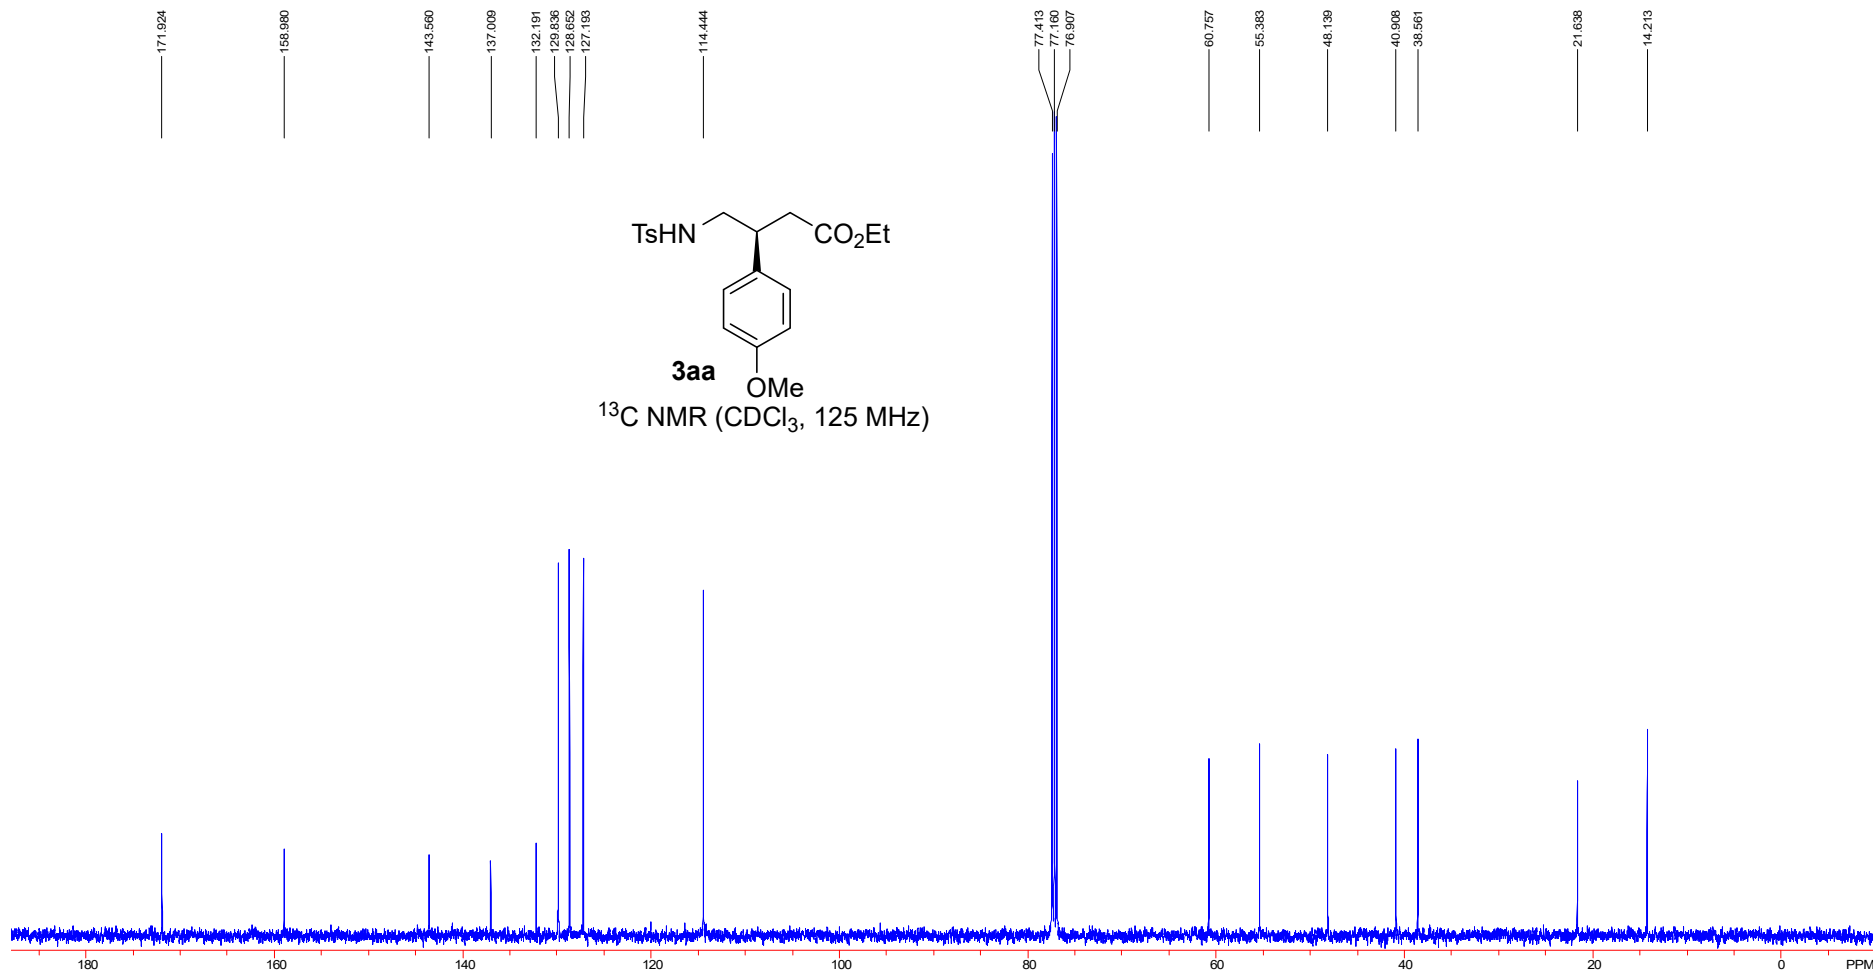

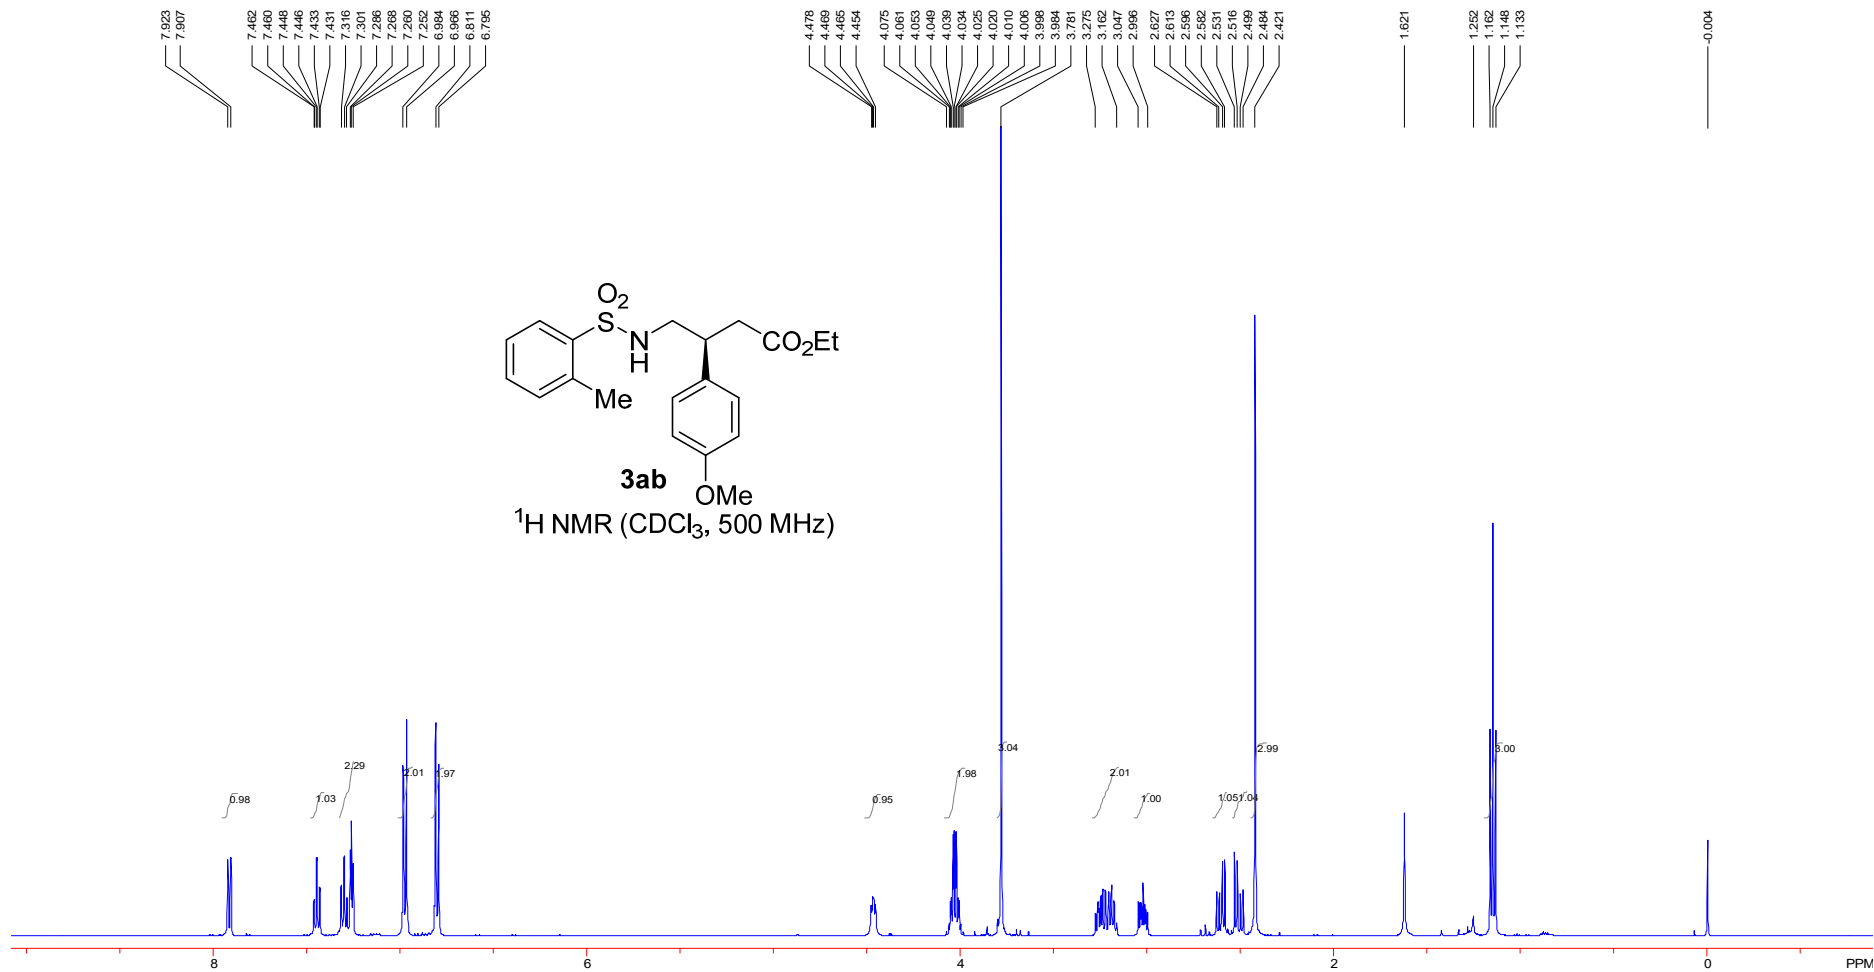

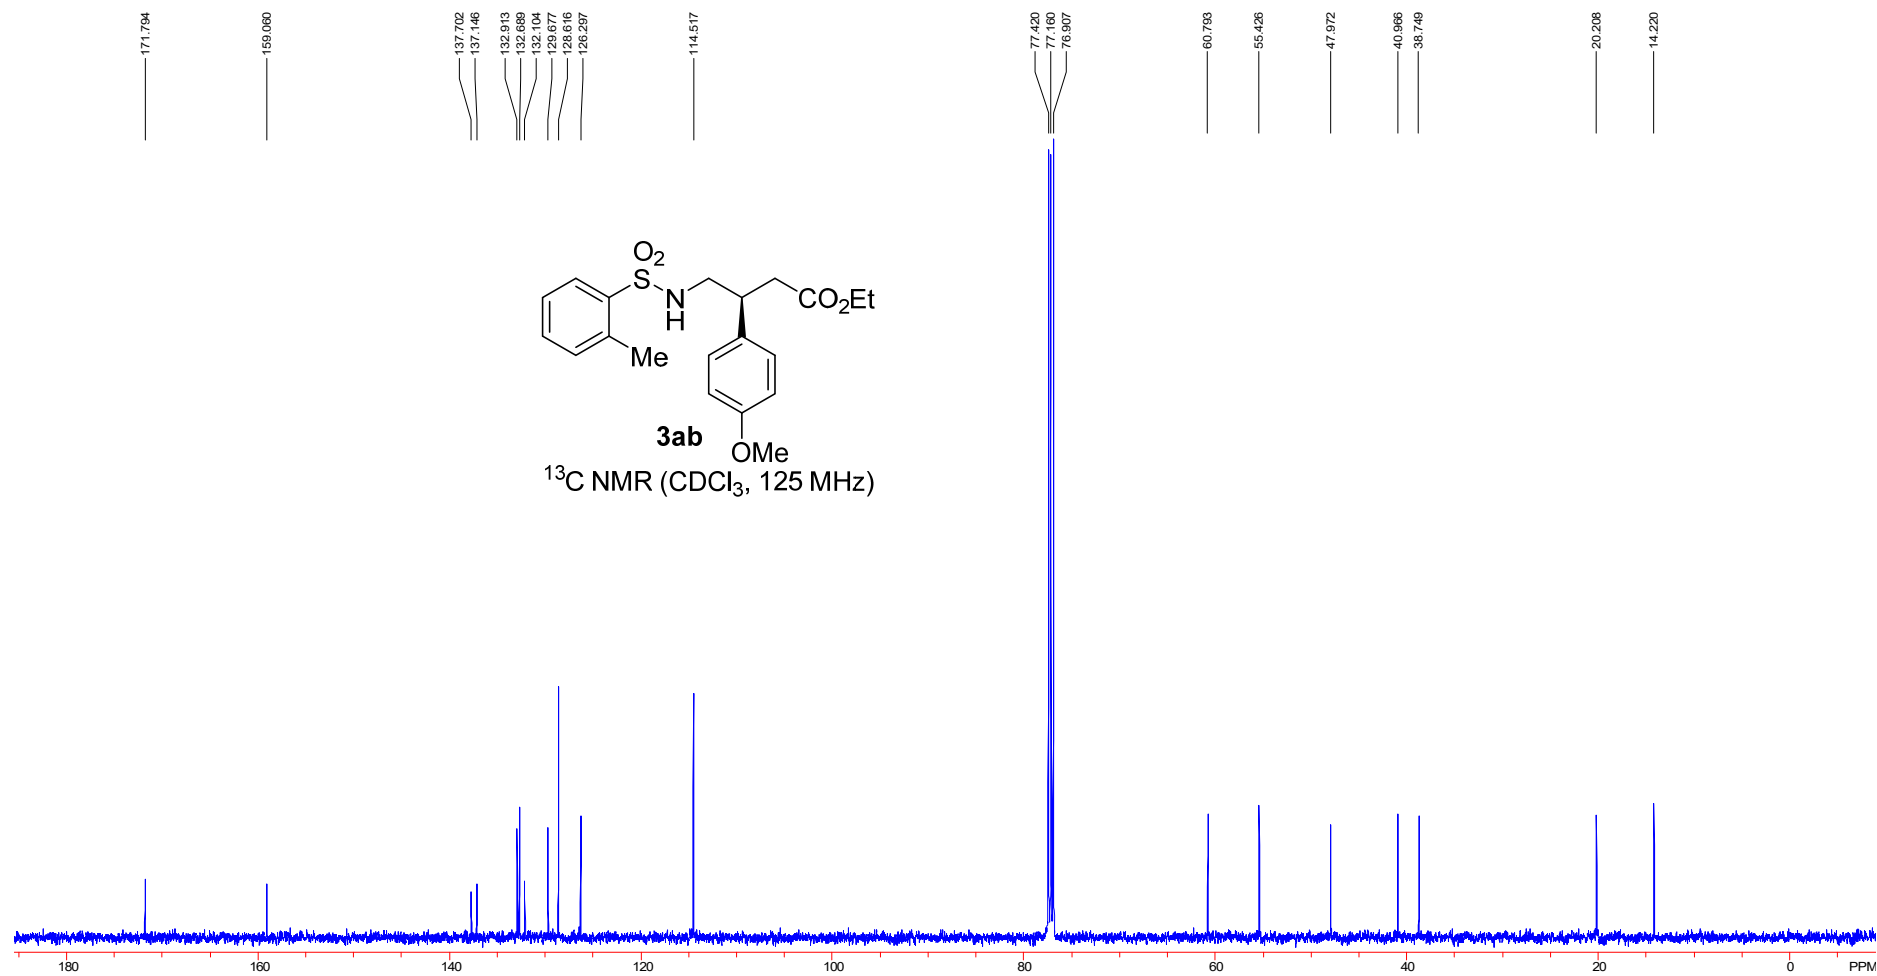

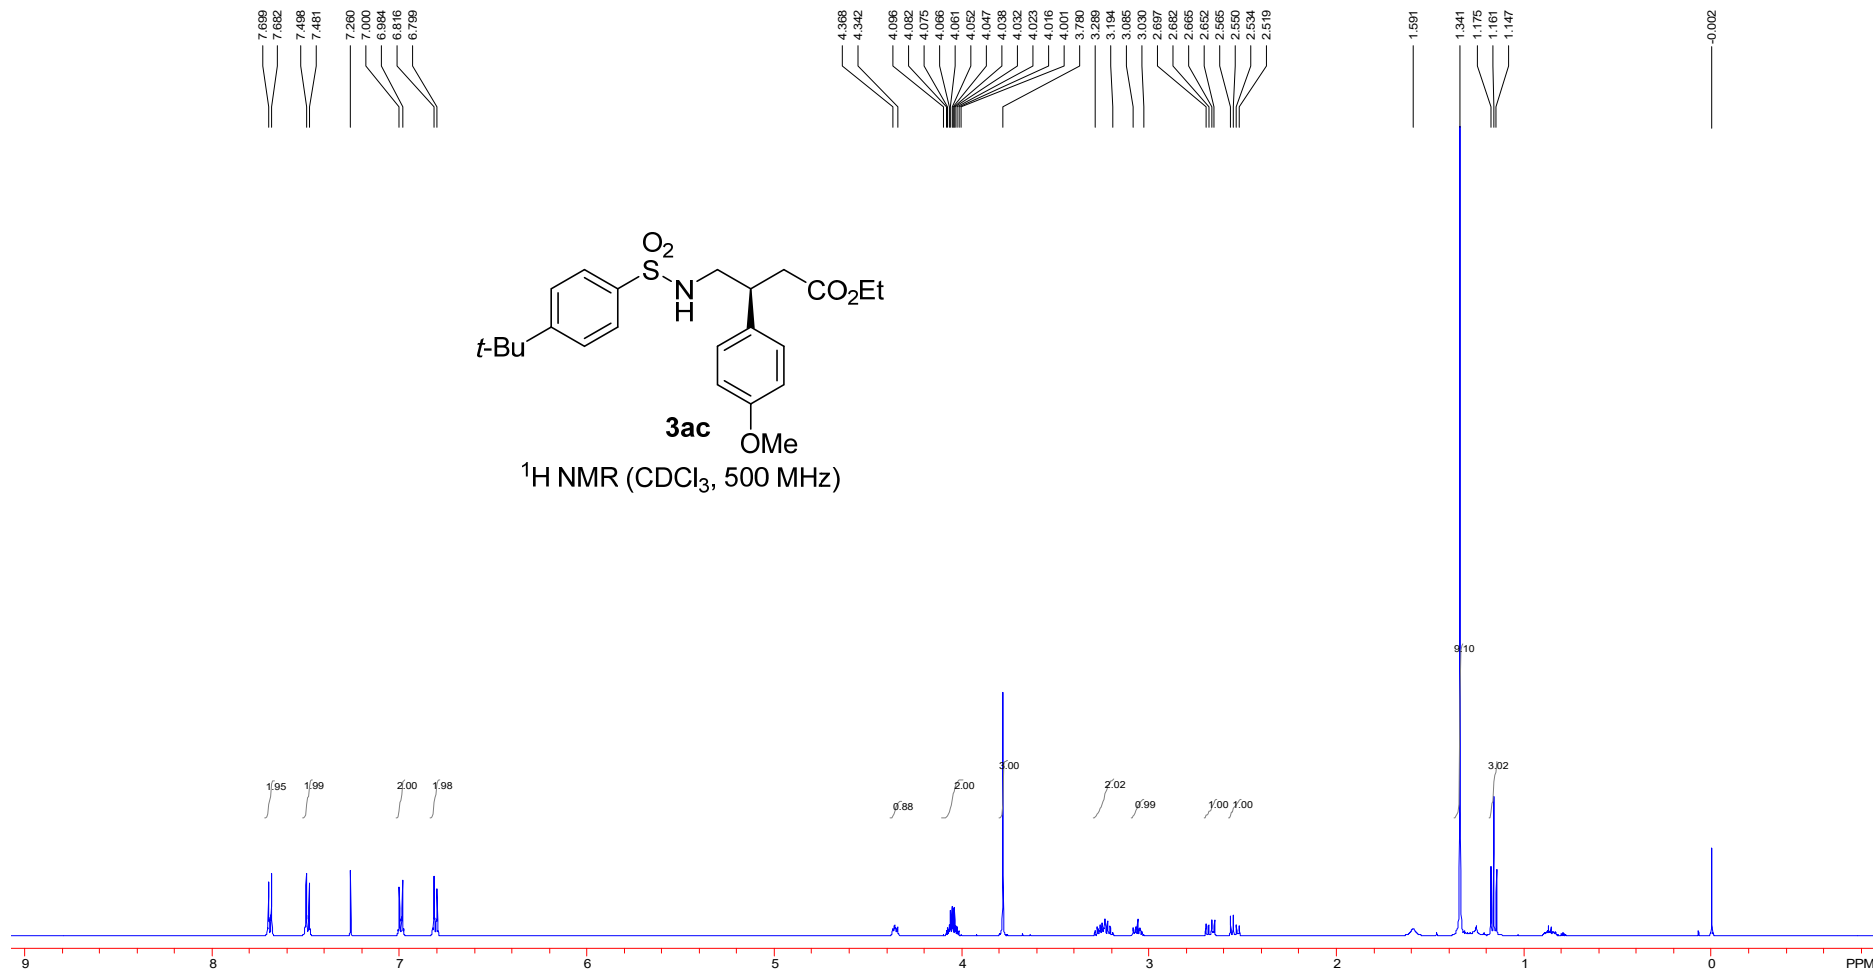

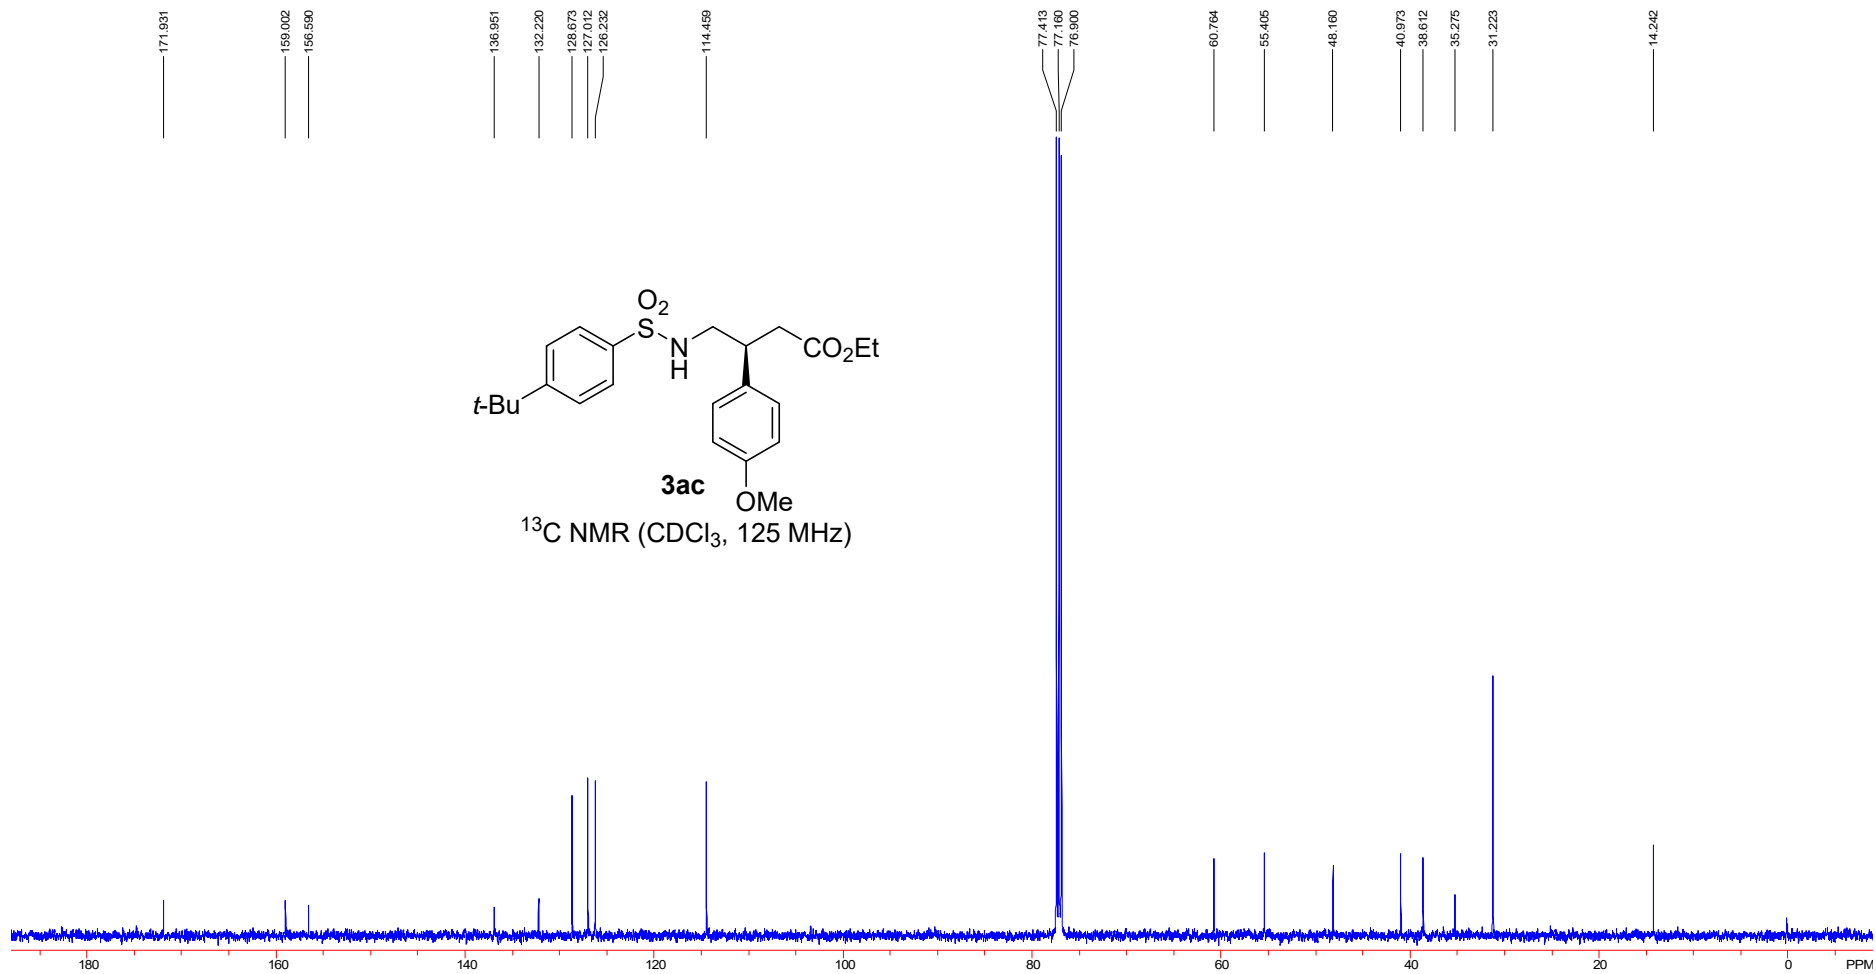





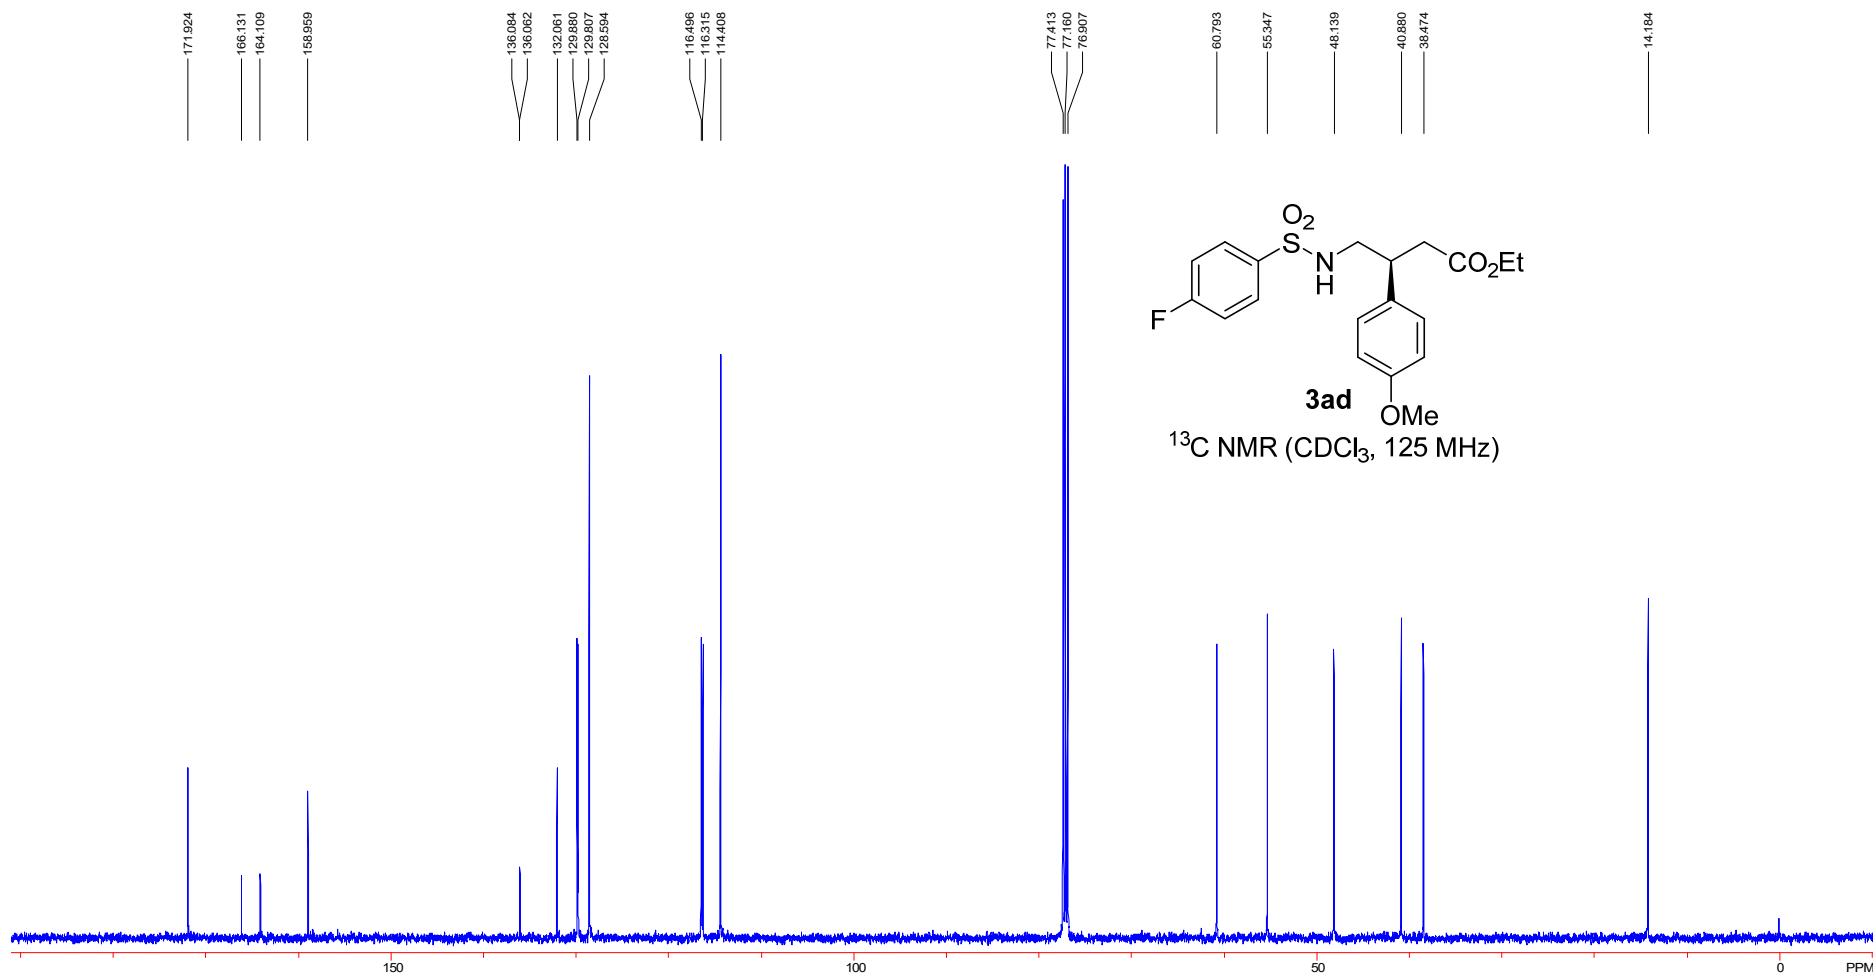

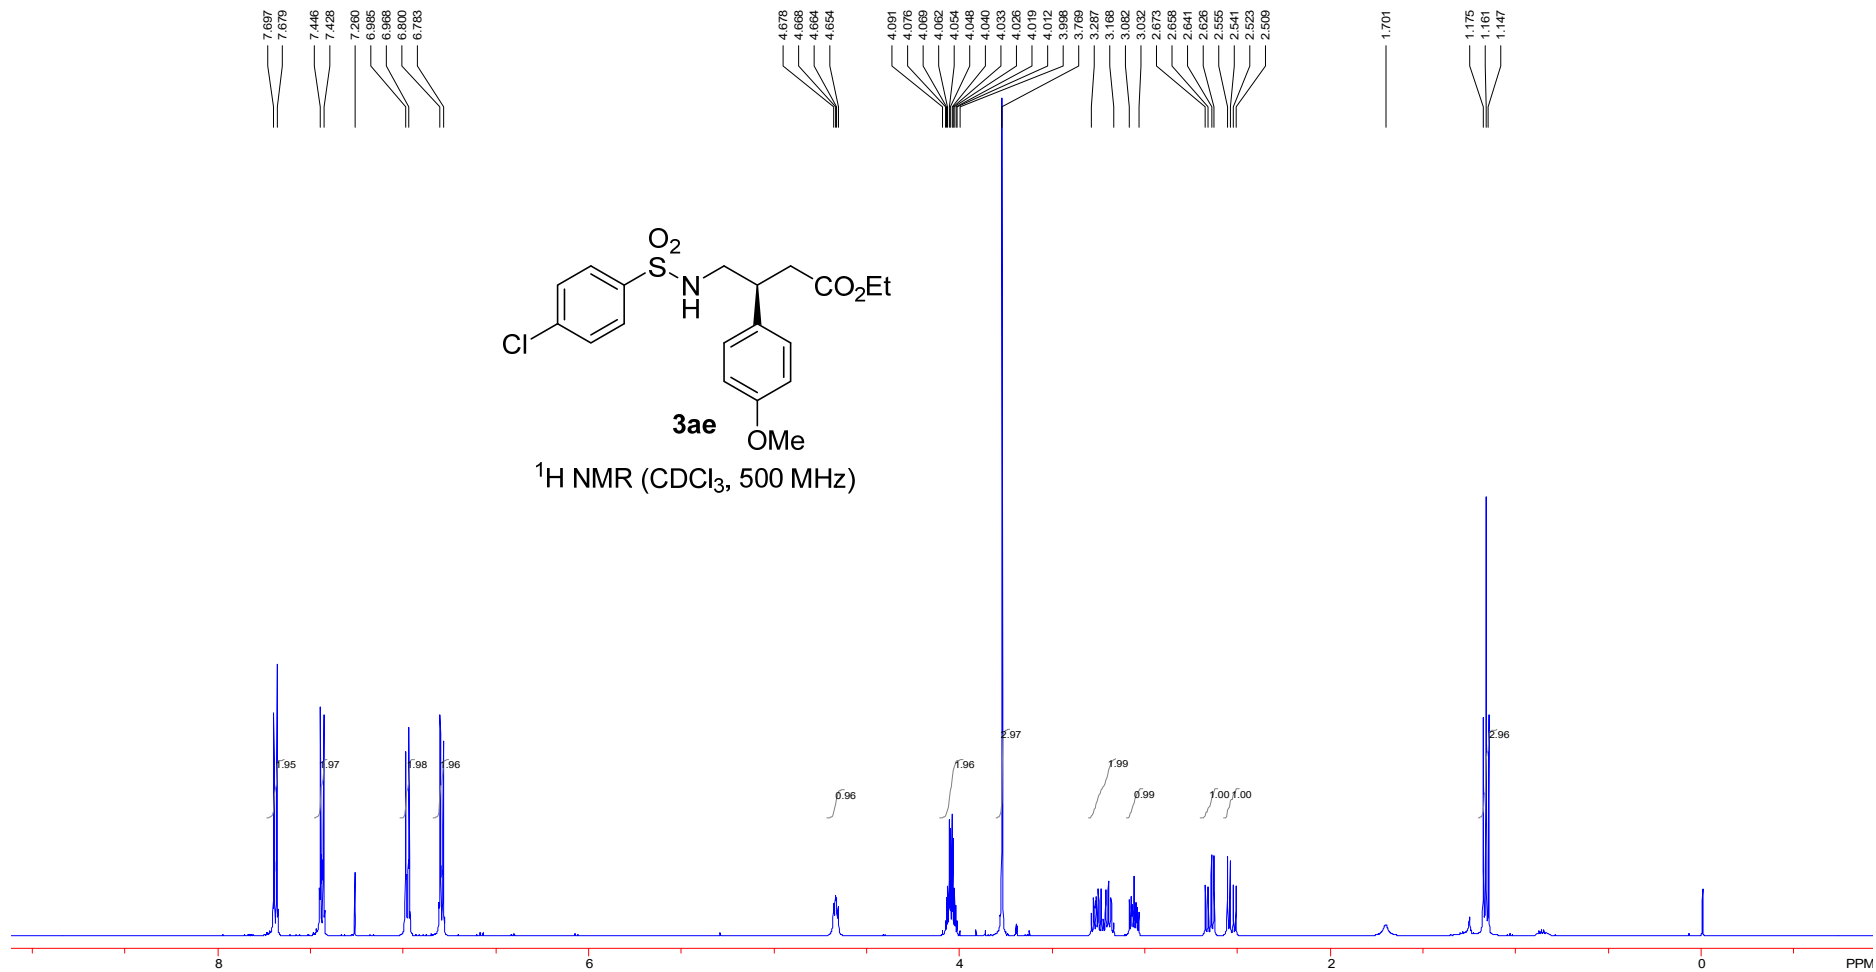

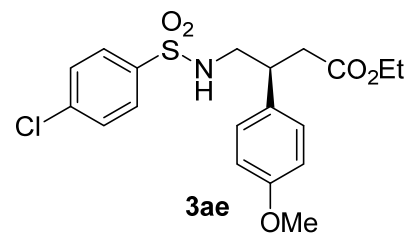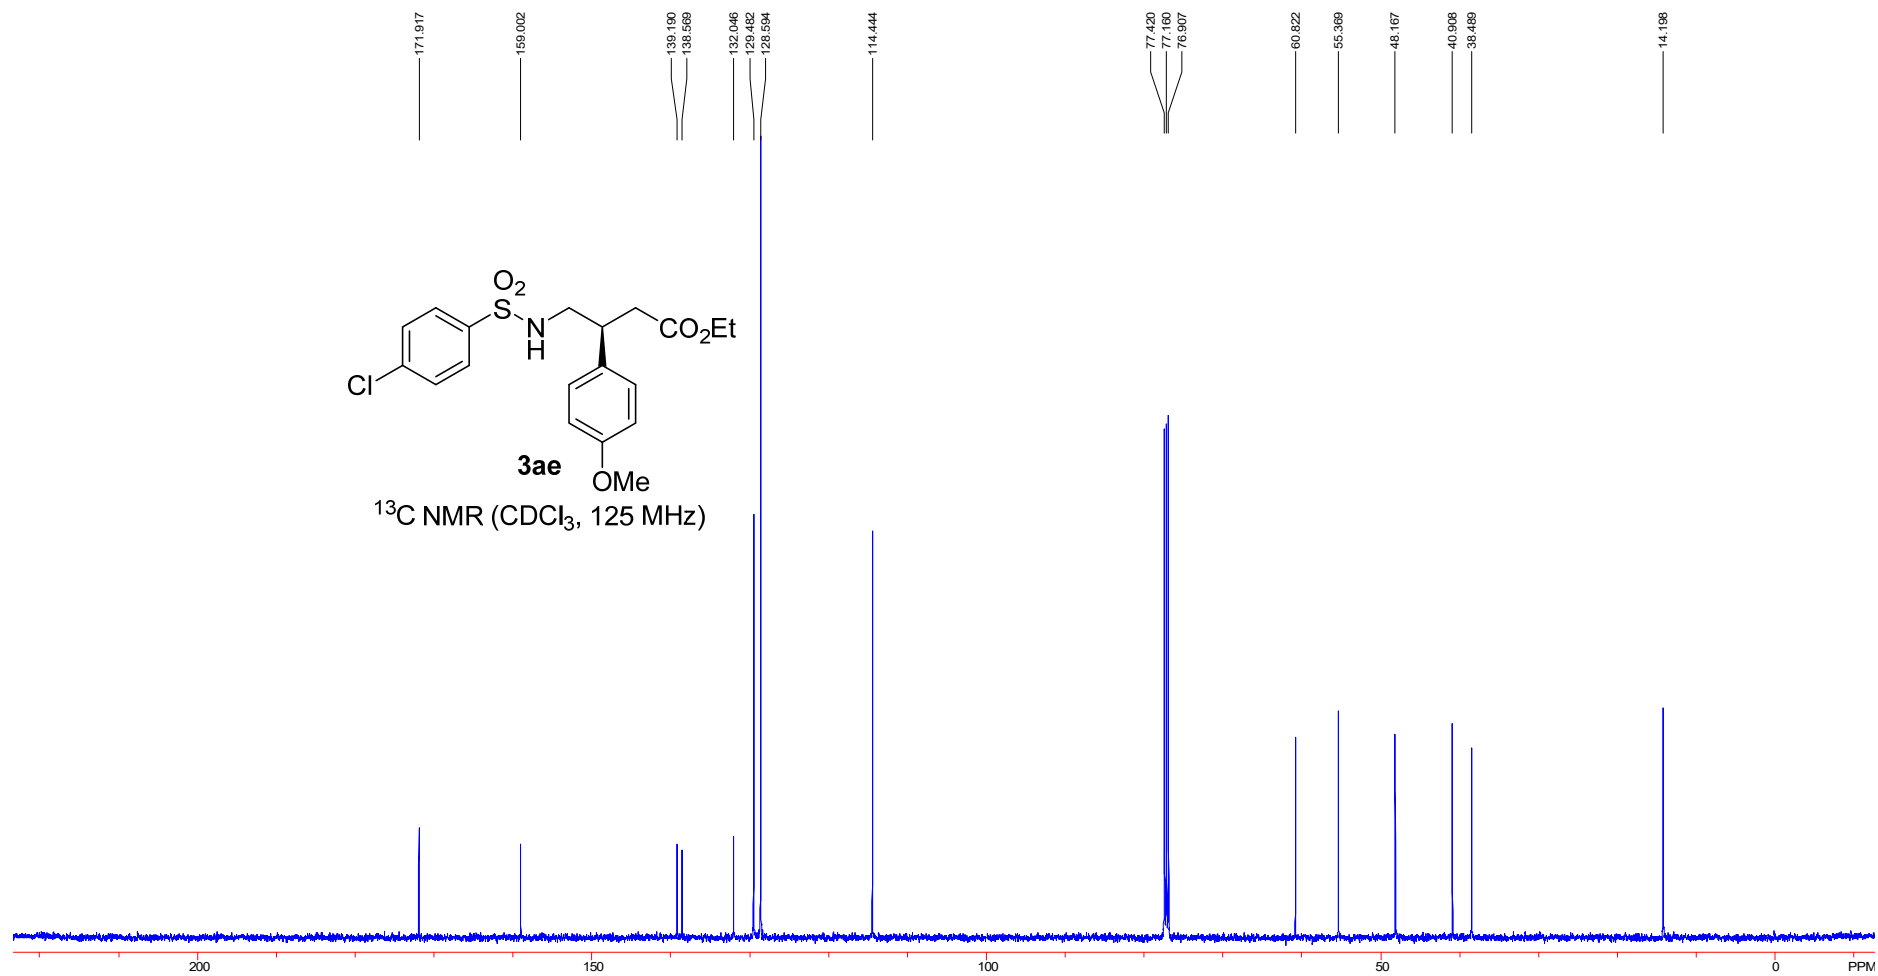

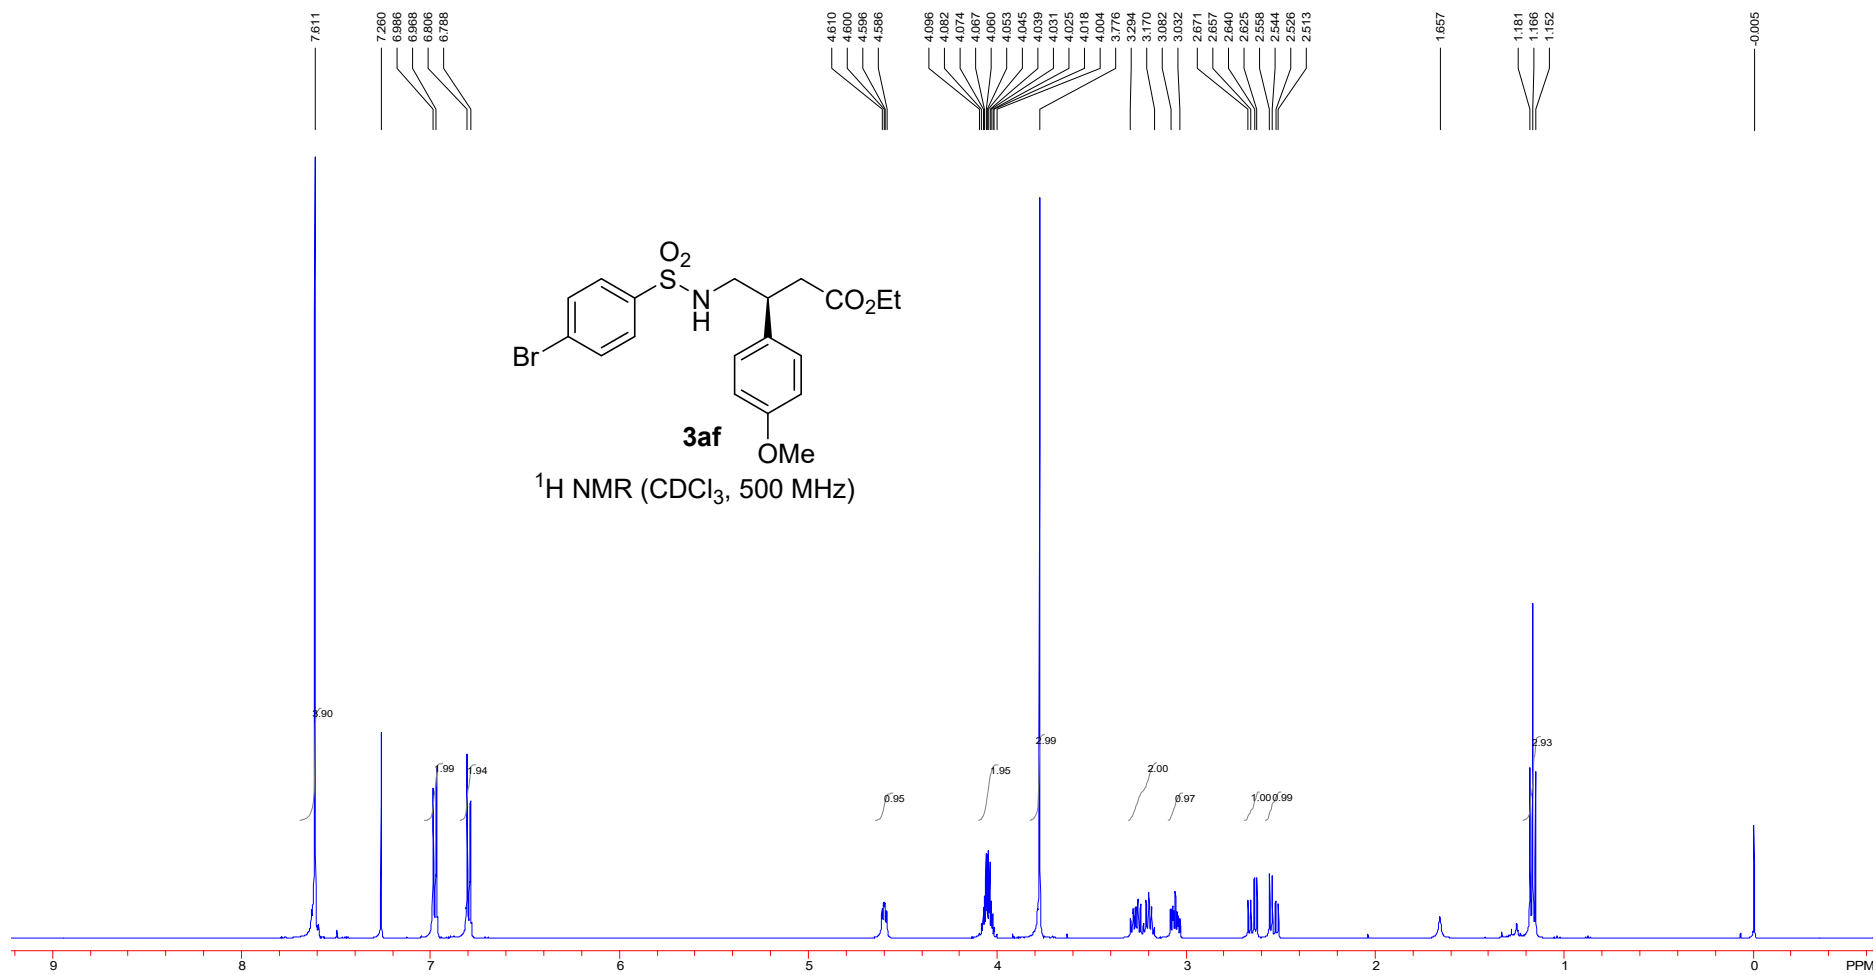

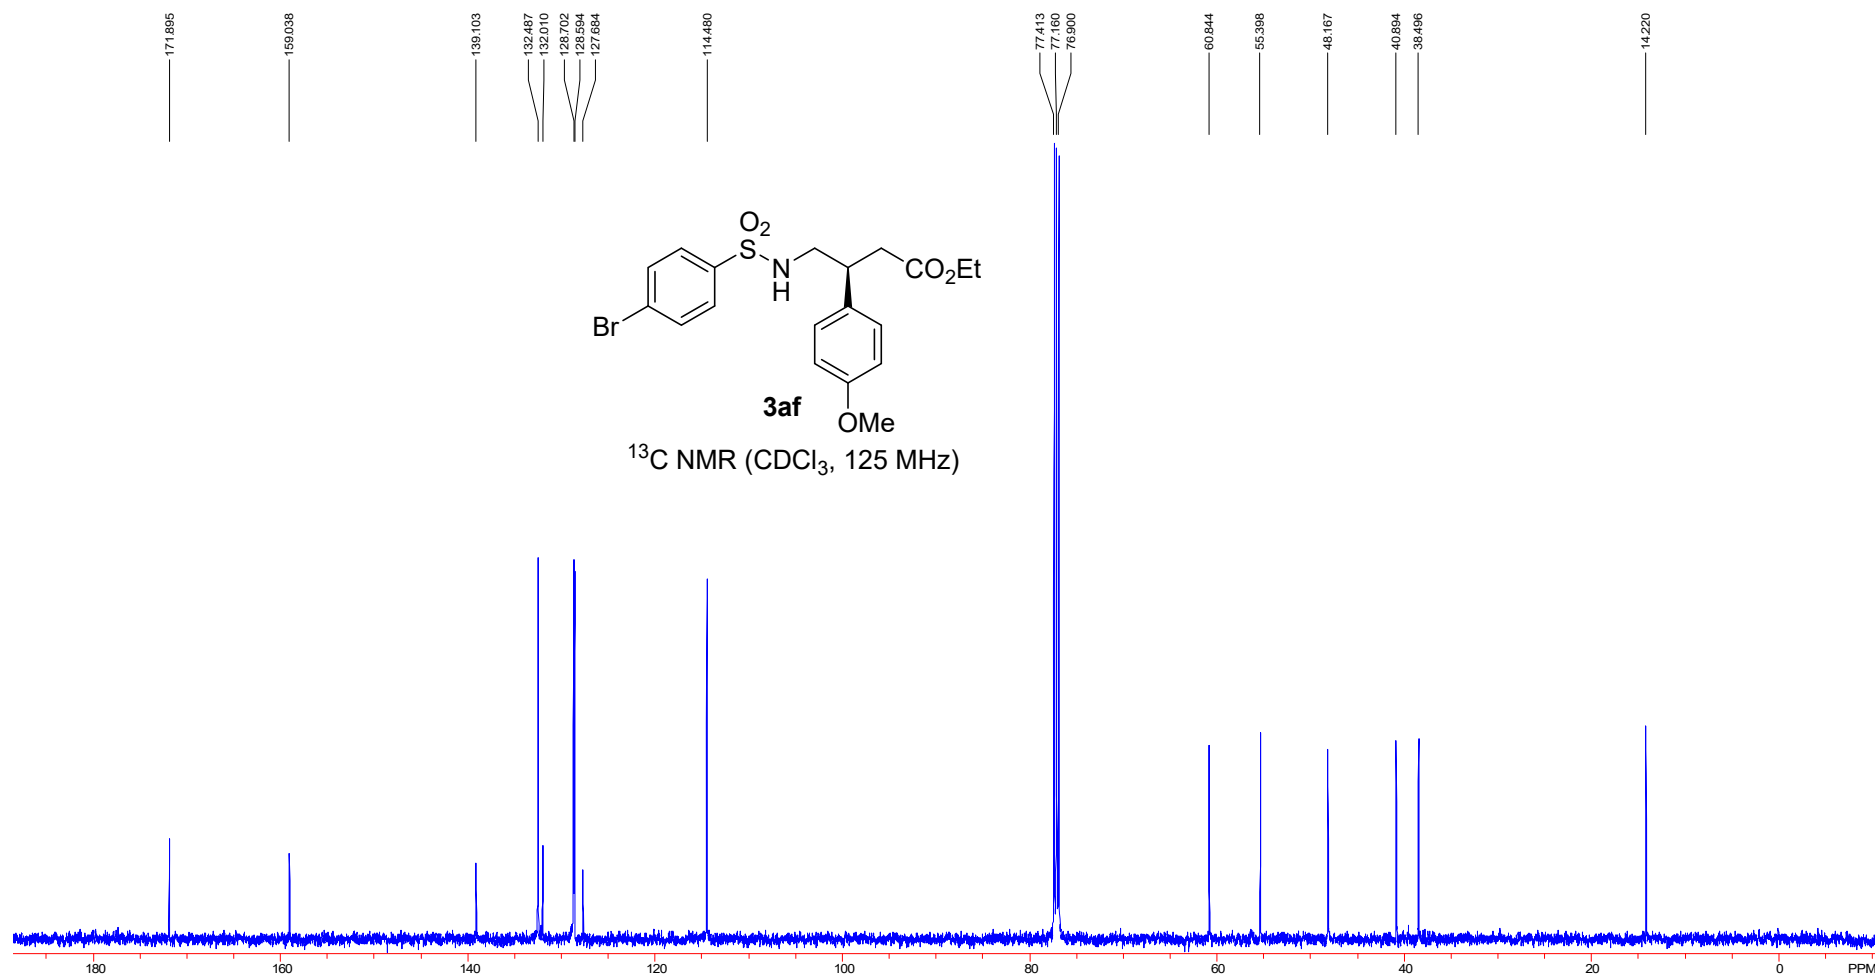



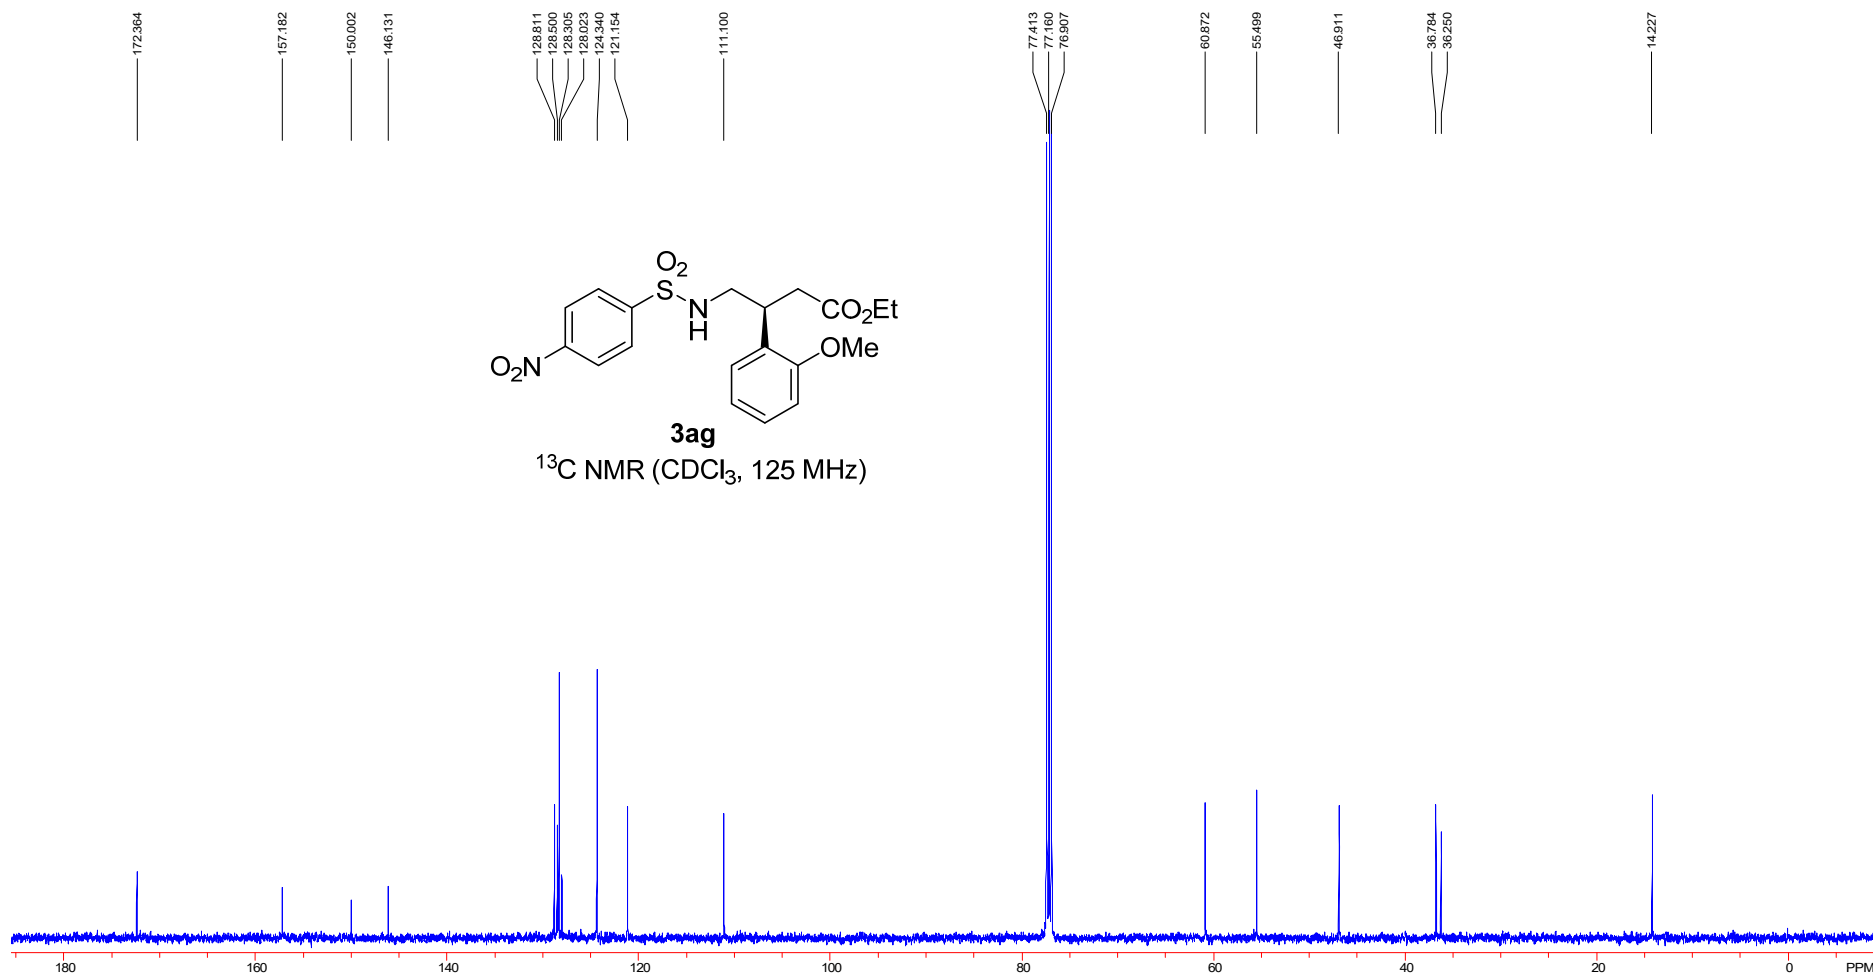



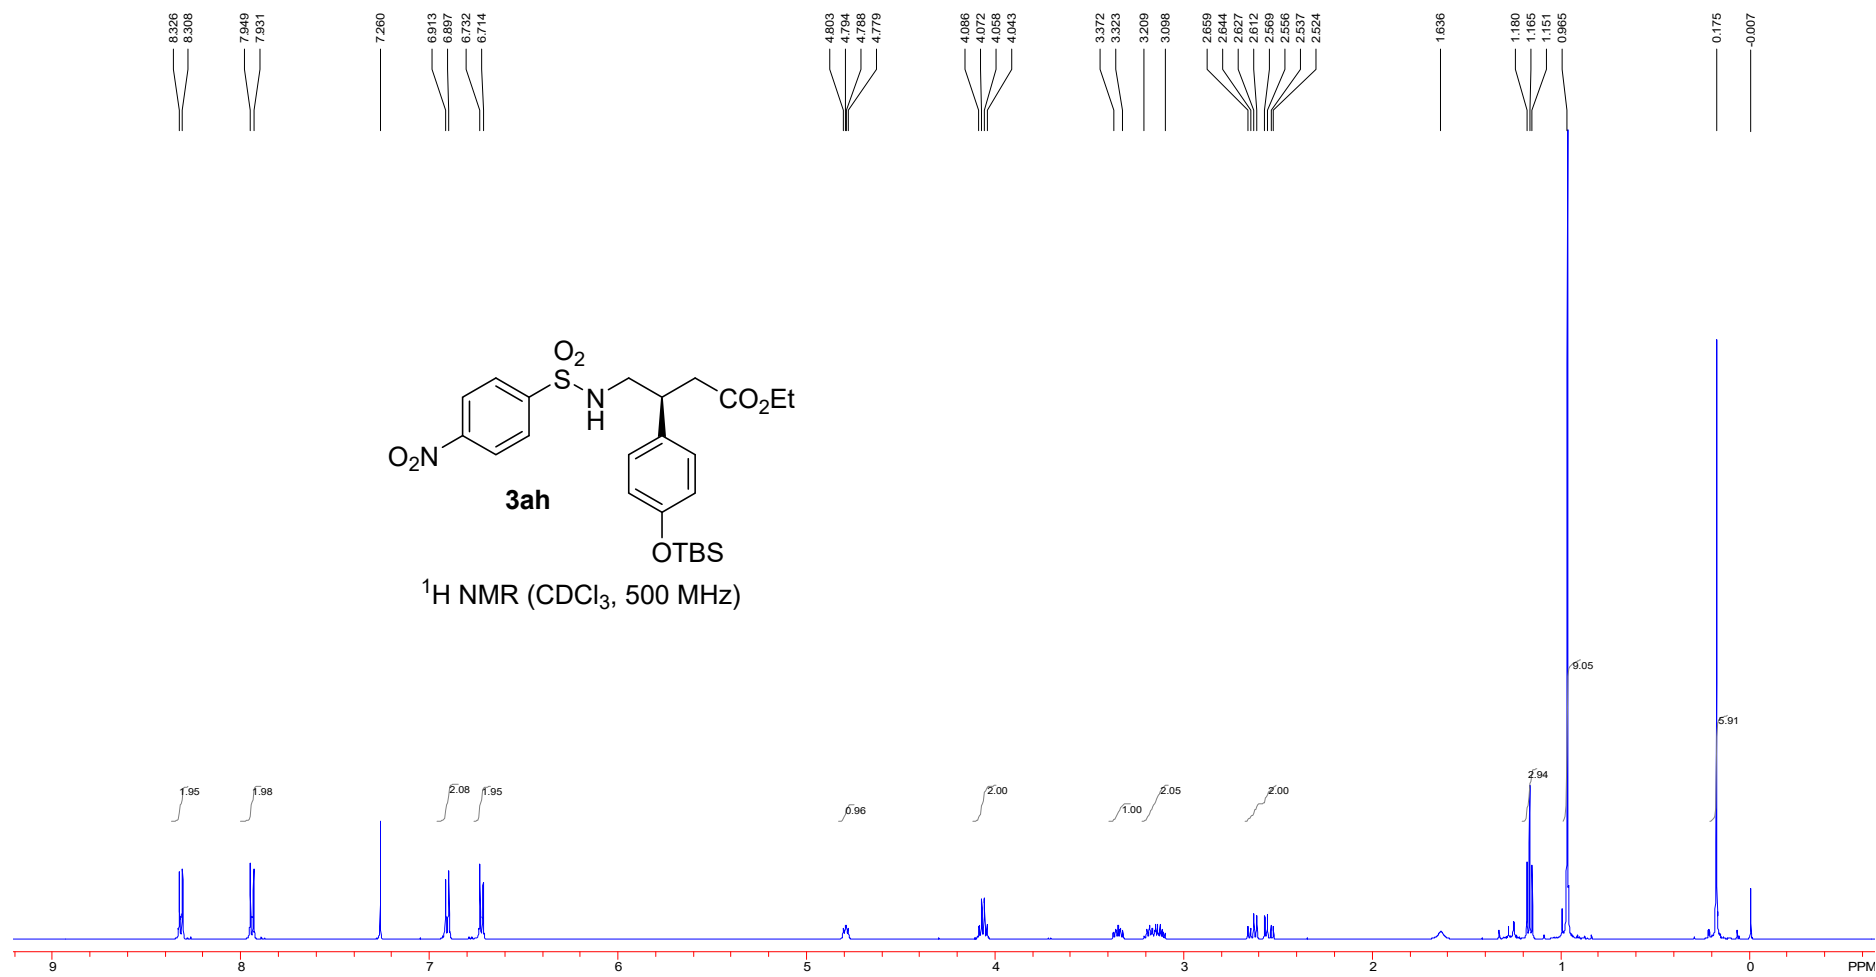

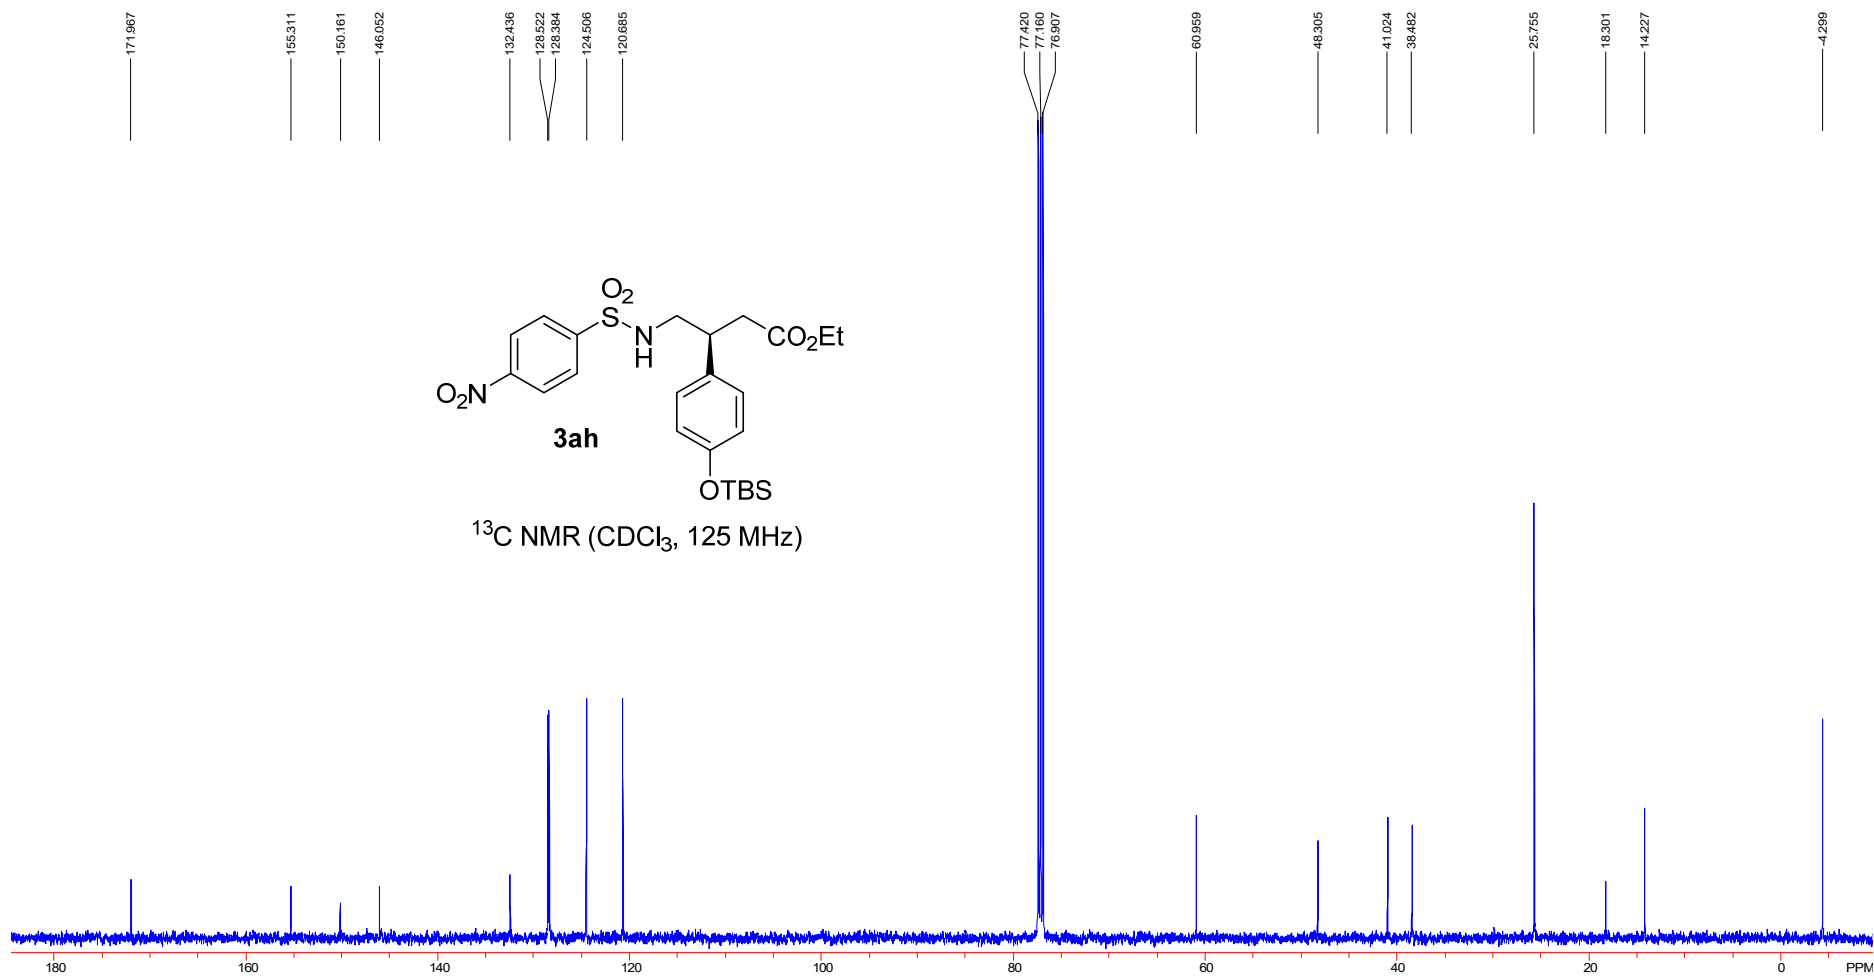

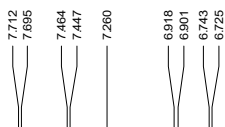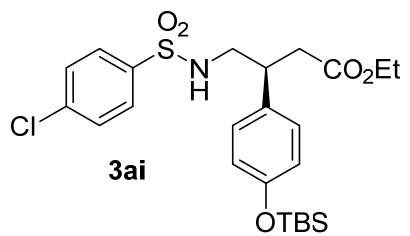

<sup>1</sup>H NMR (CDCl<sub>3</sub>, 500 MHz)

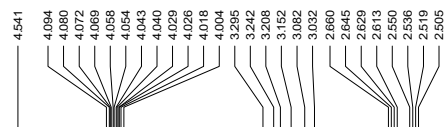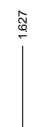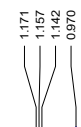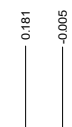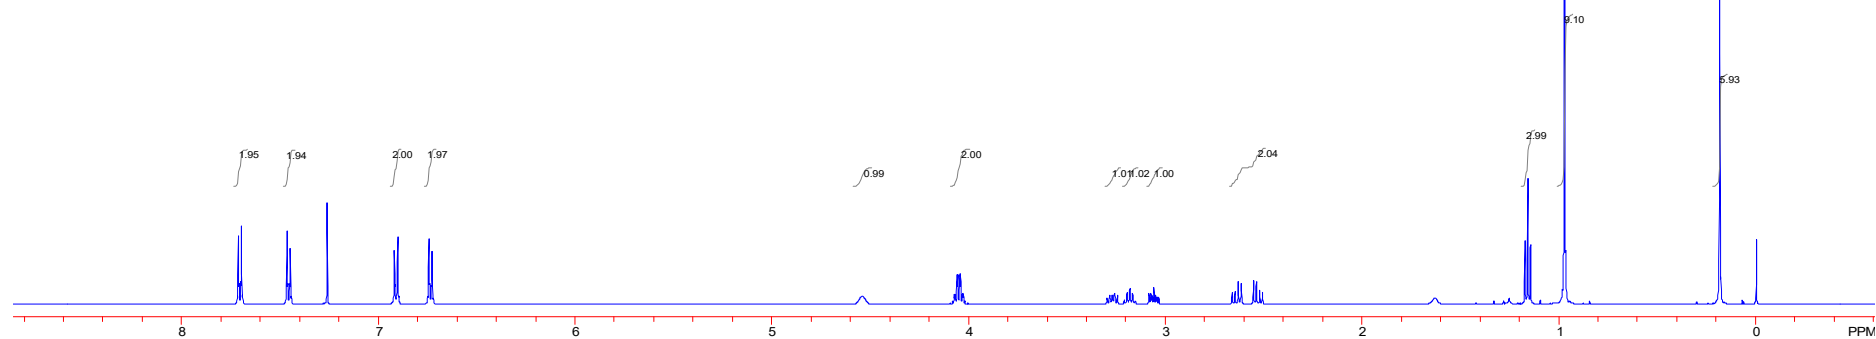

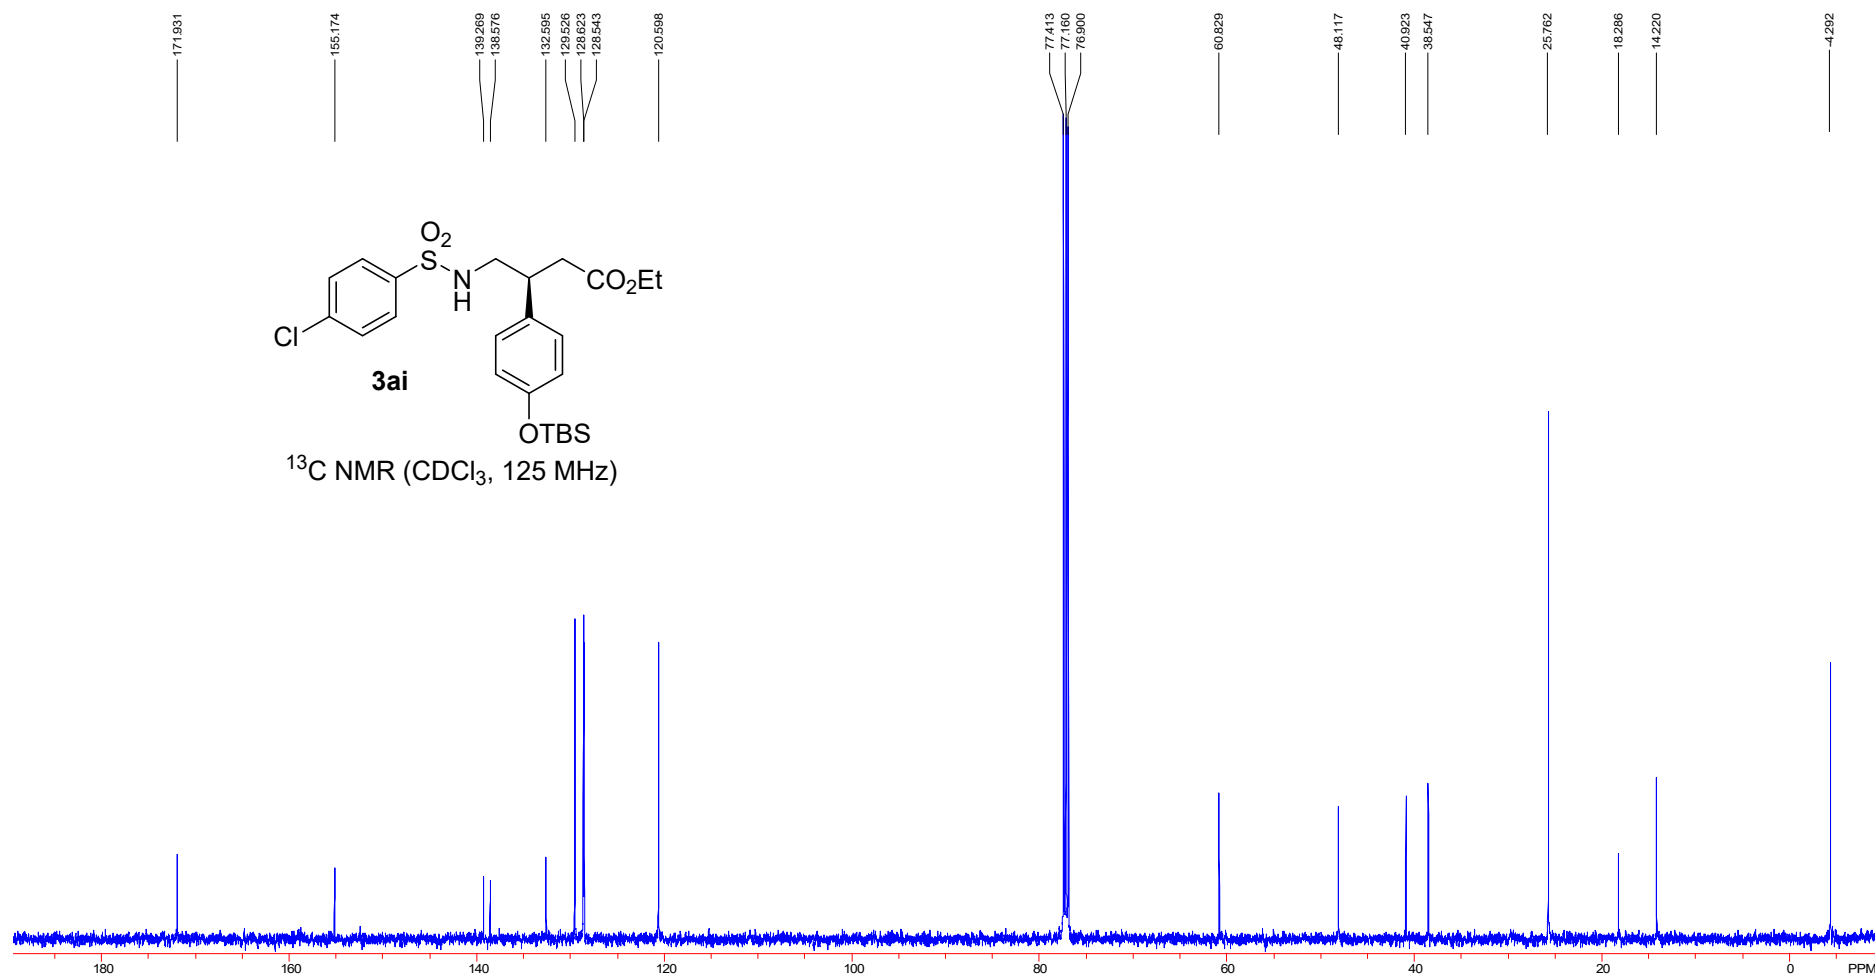

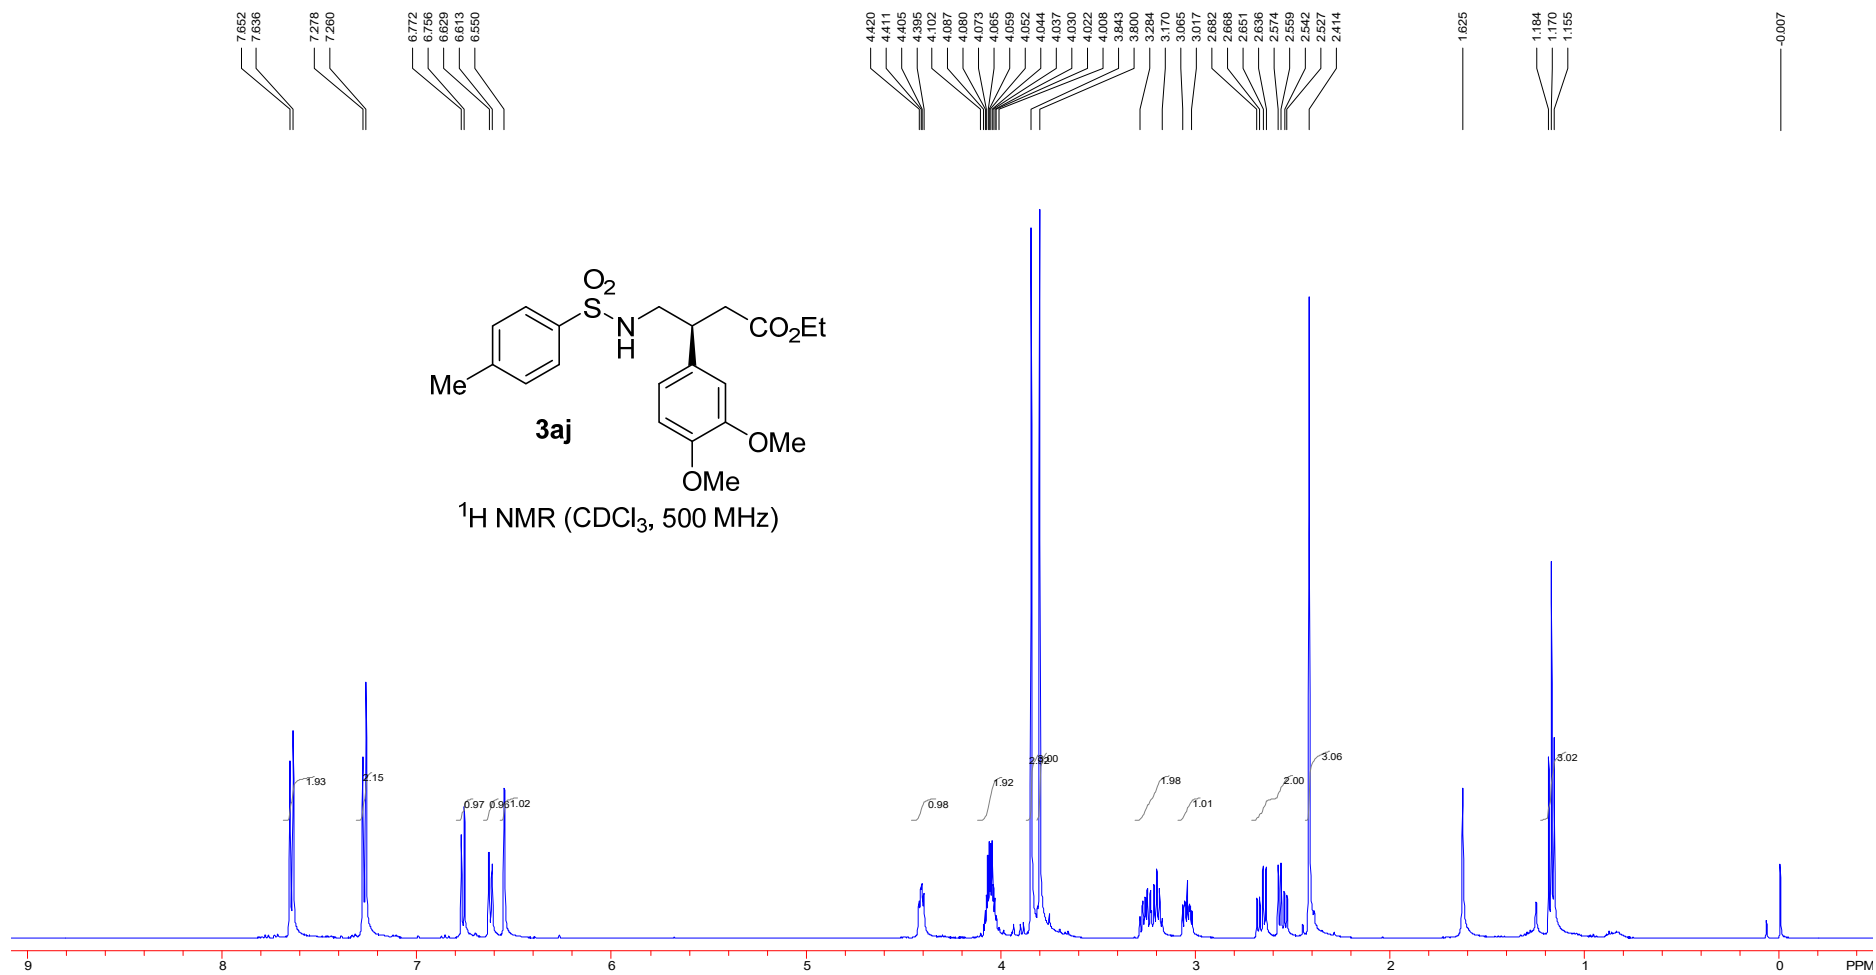

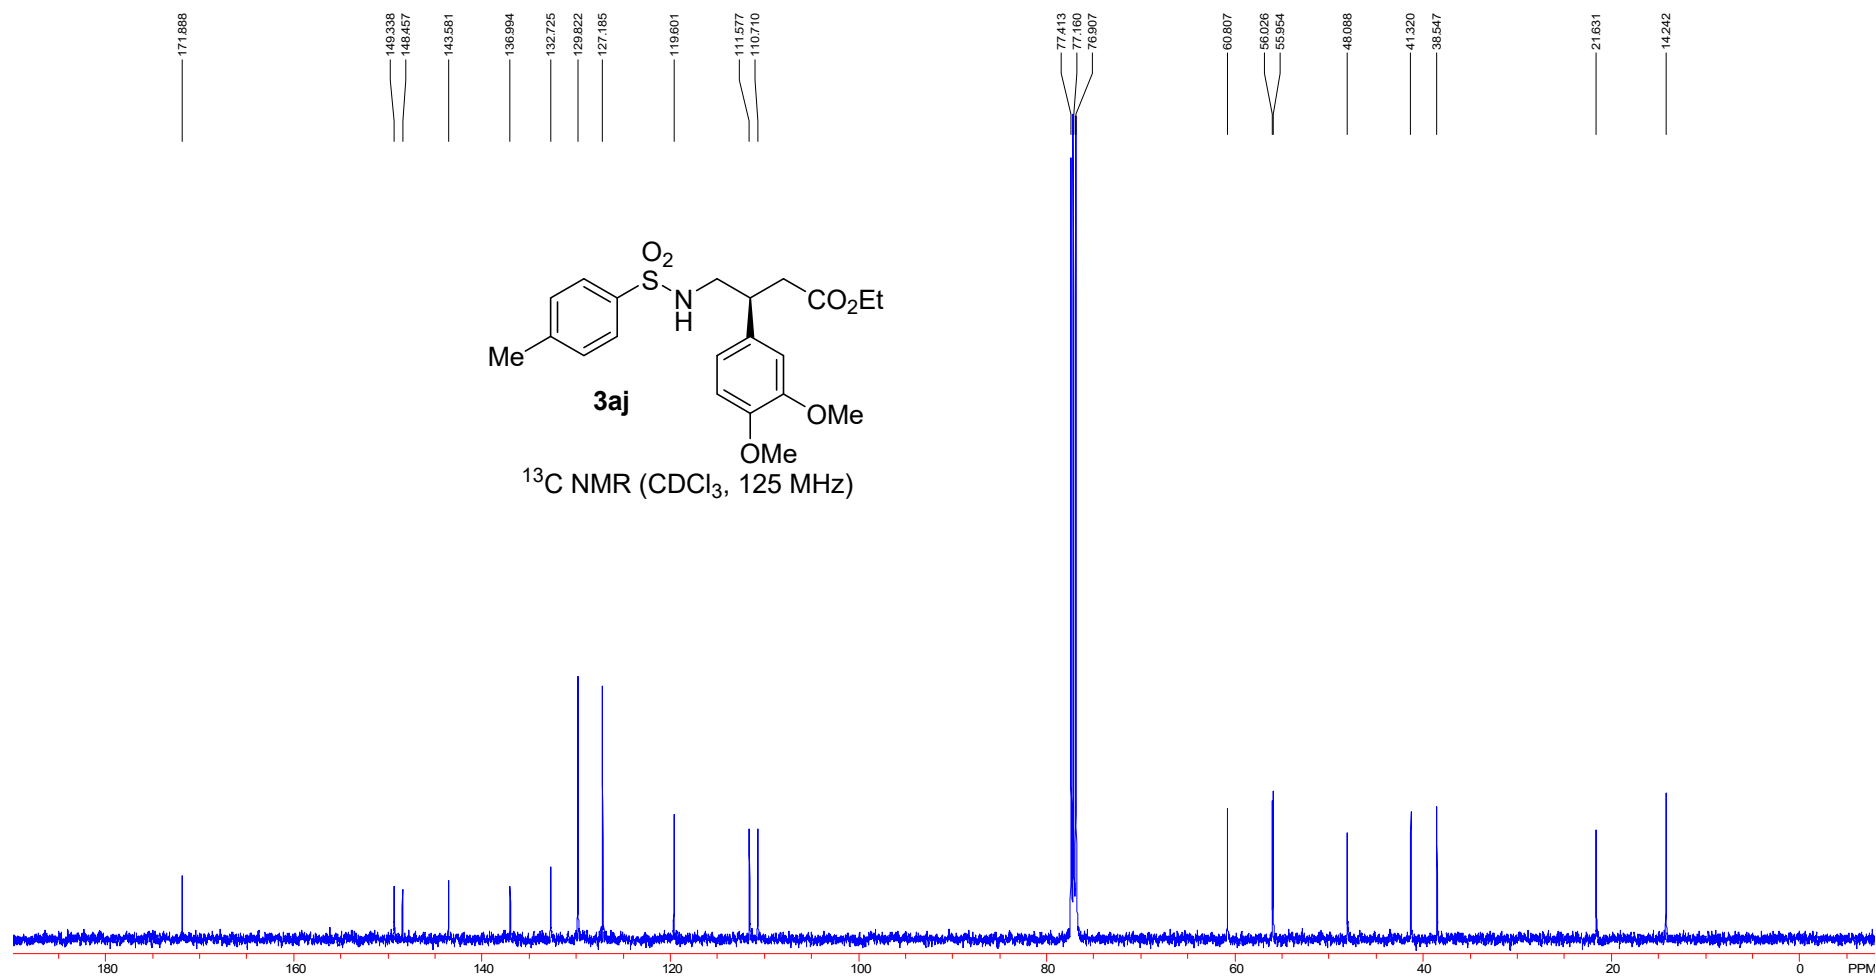

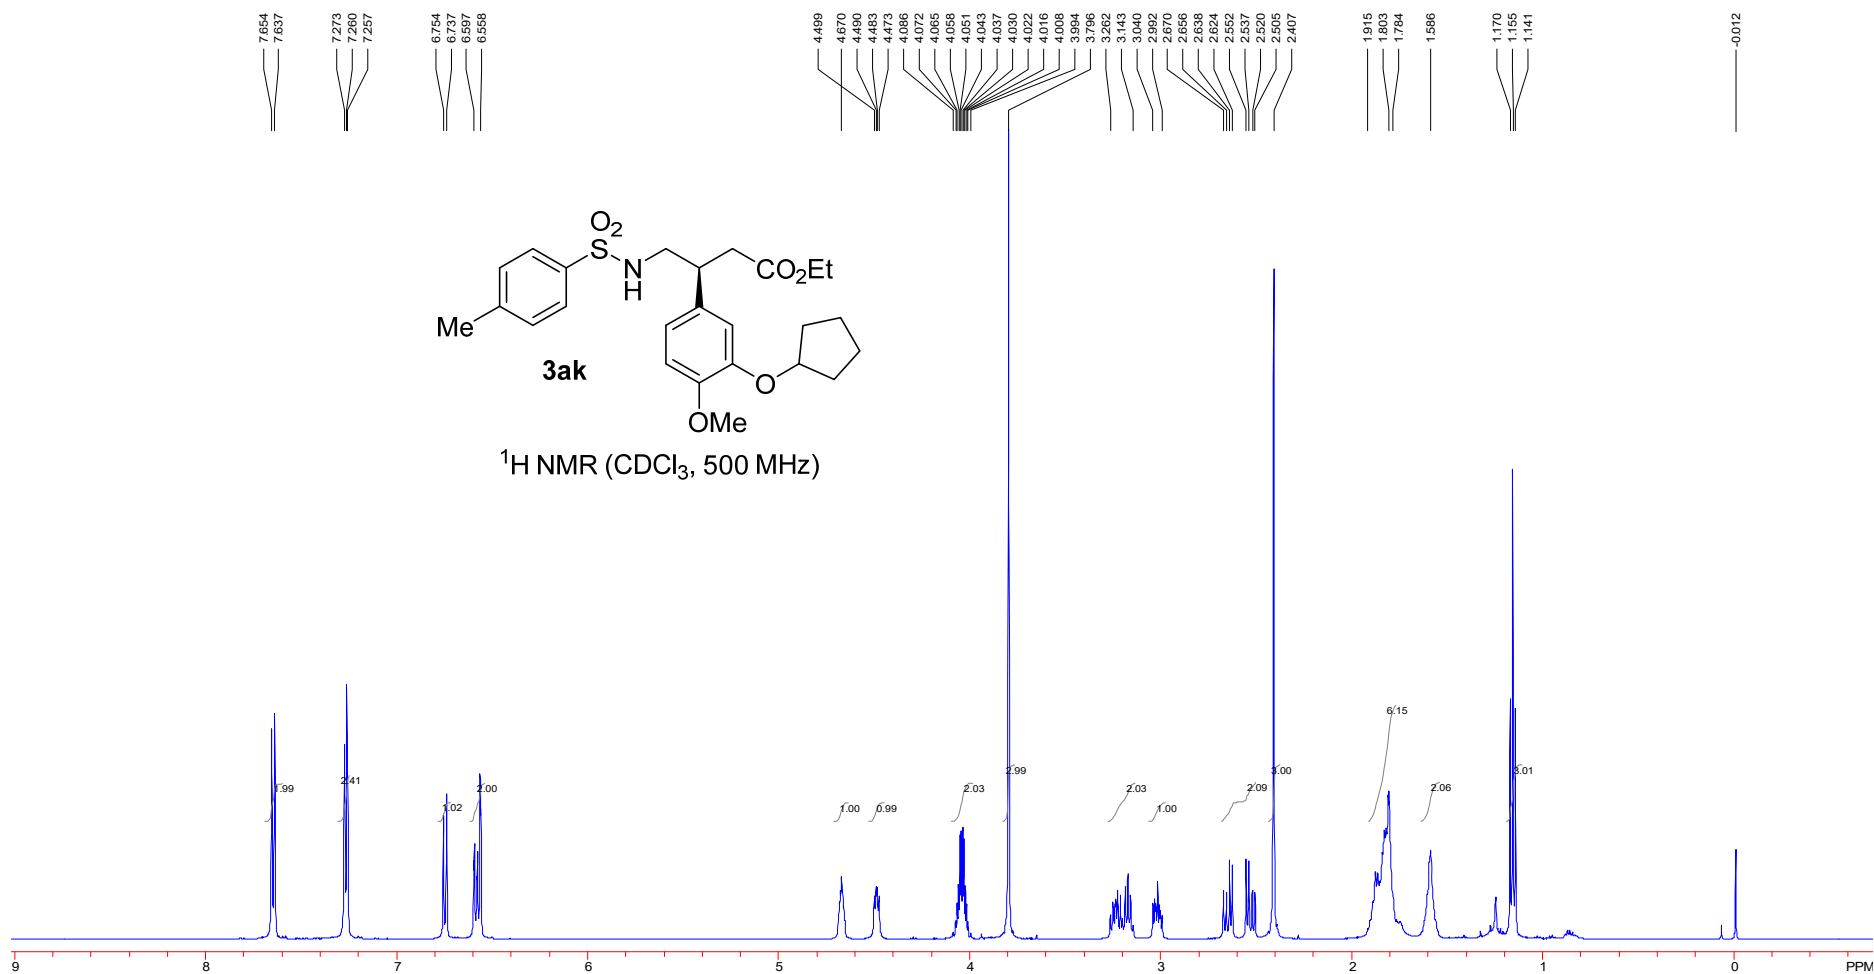

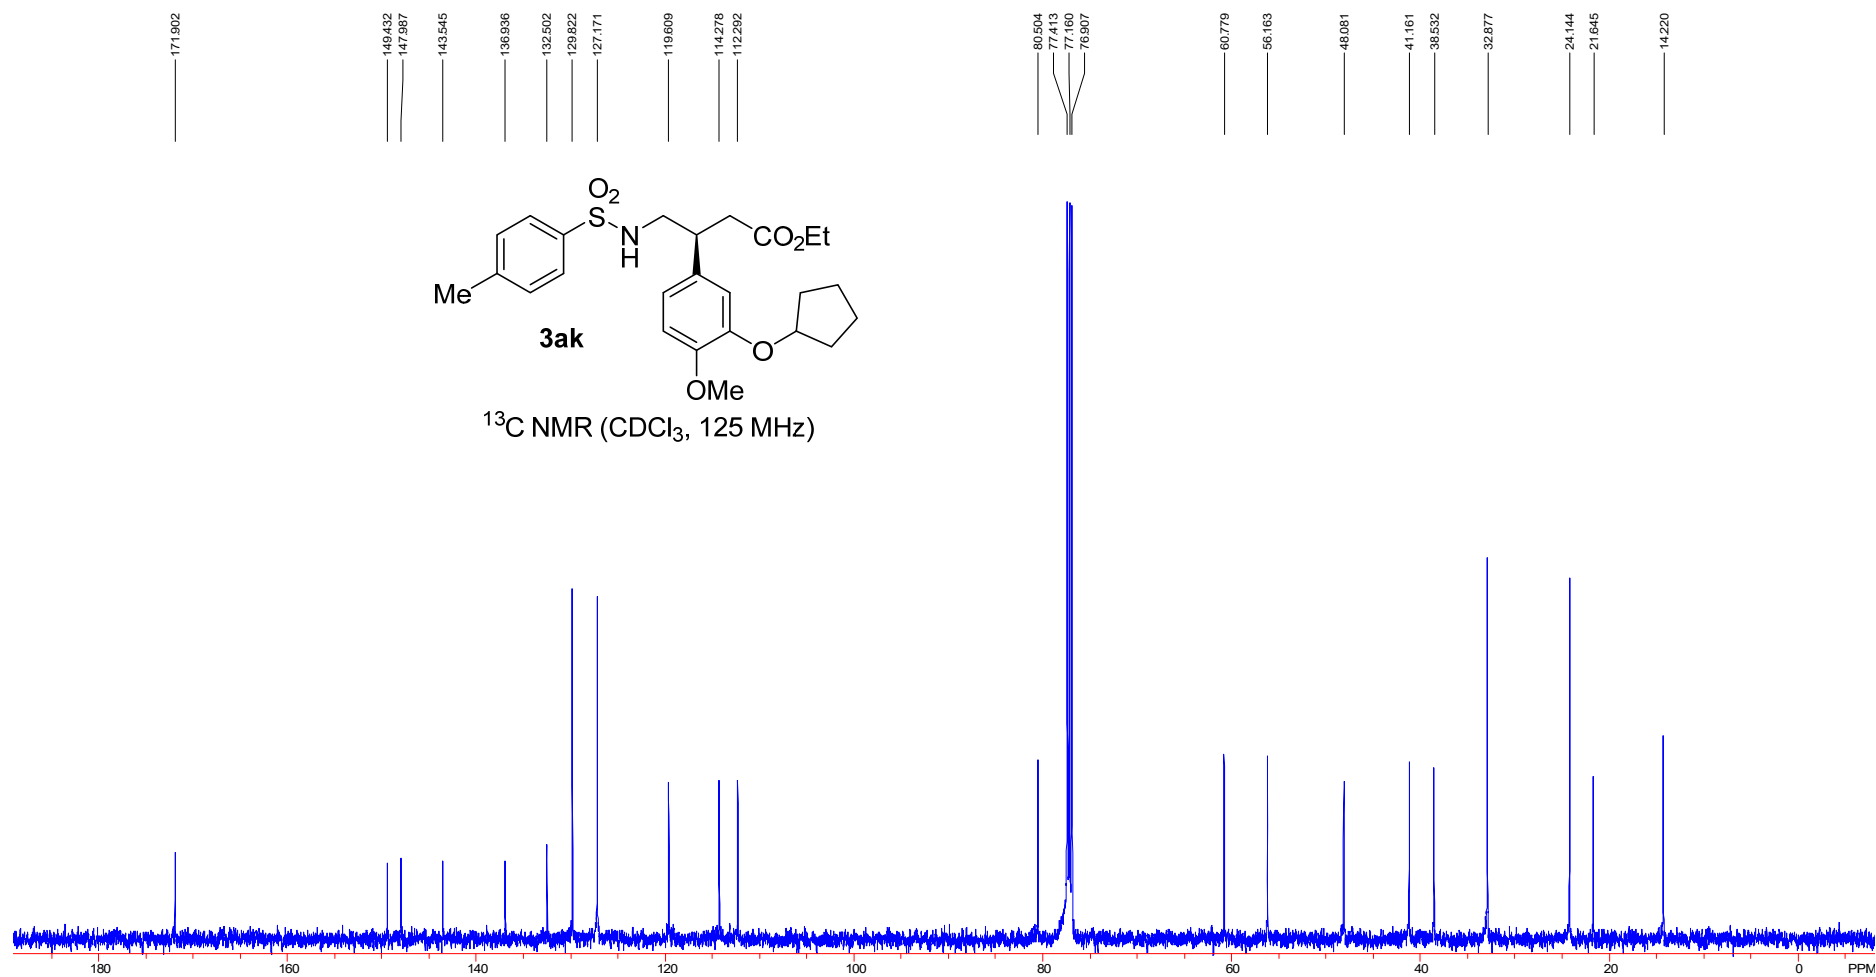



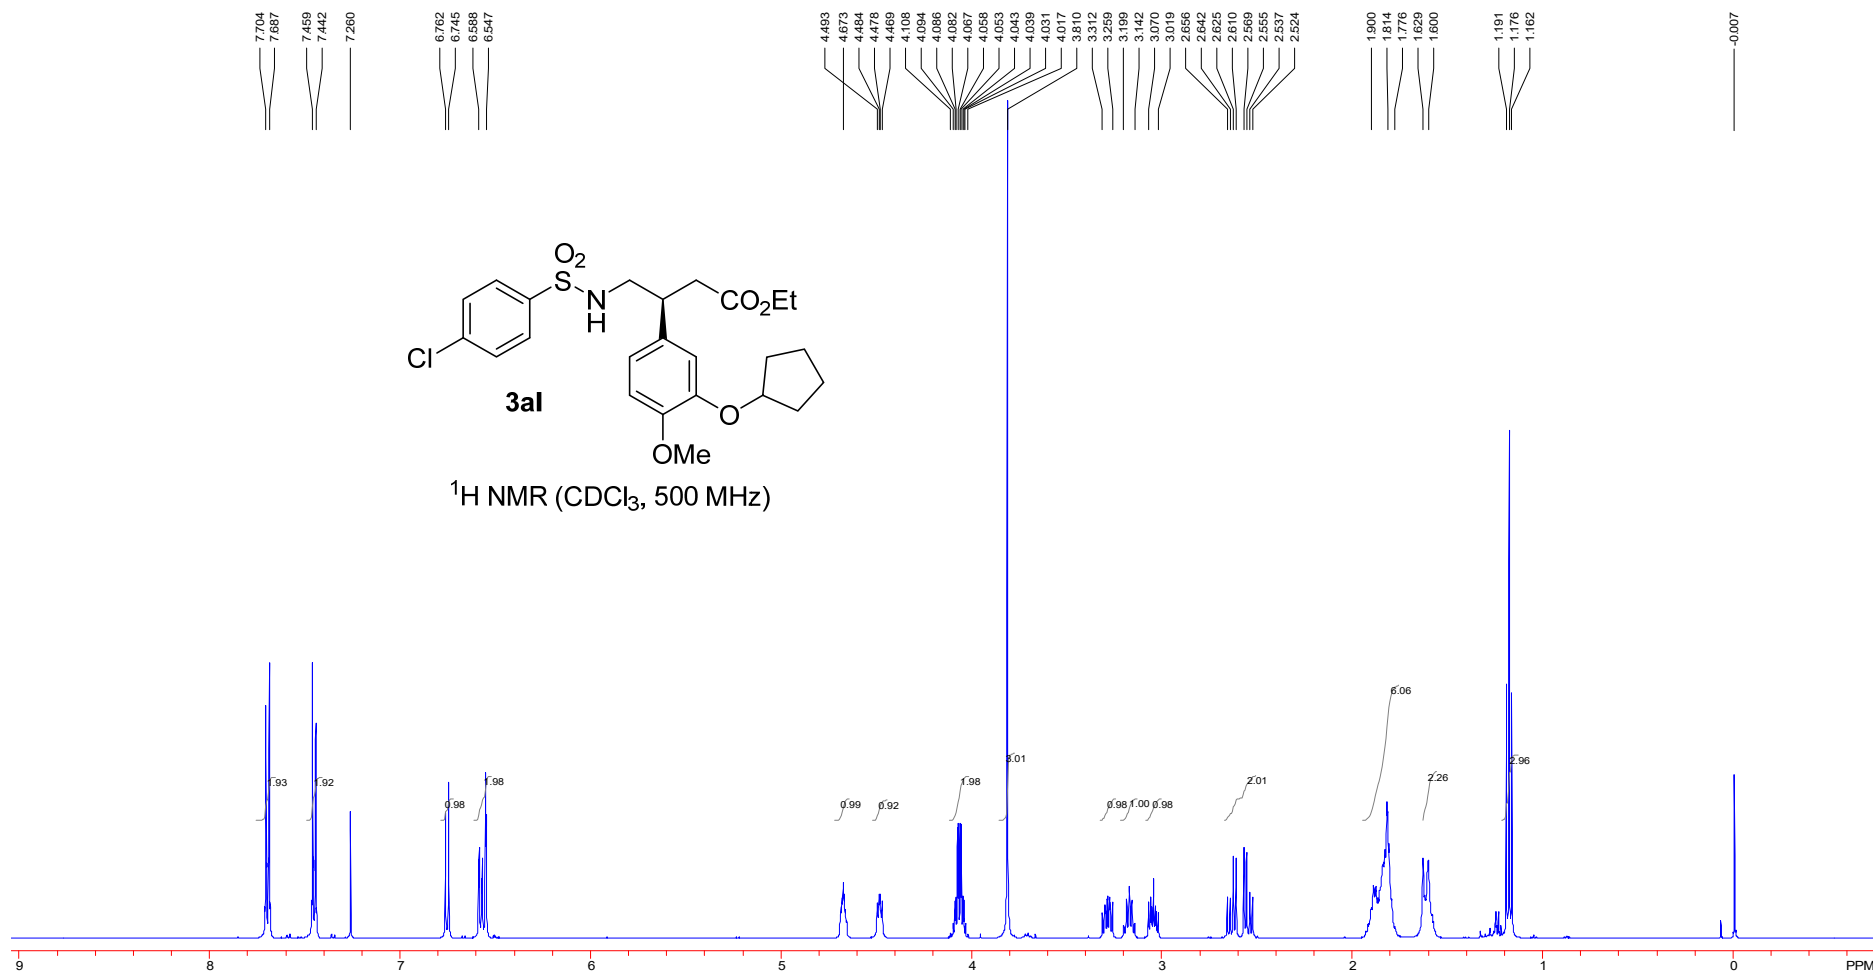

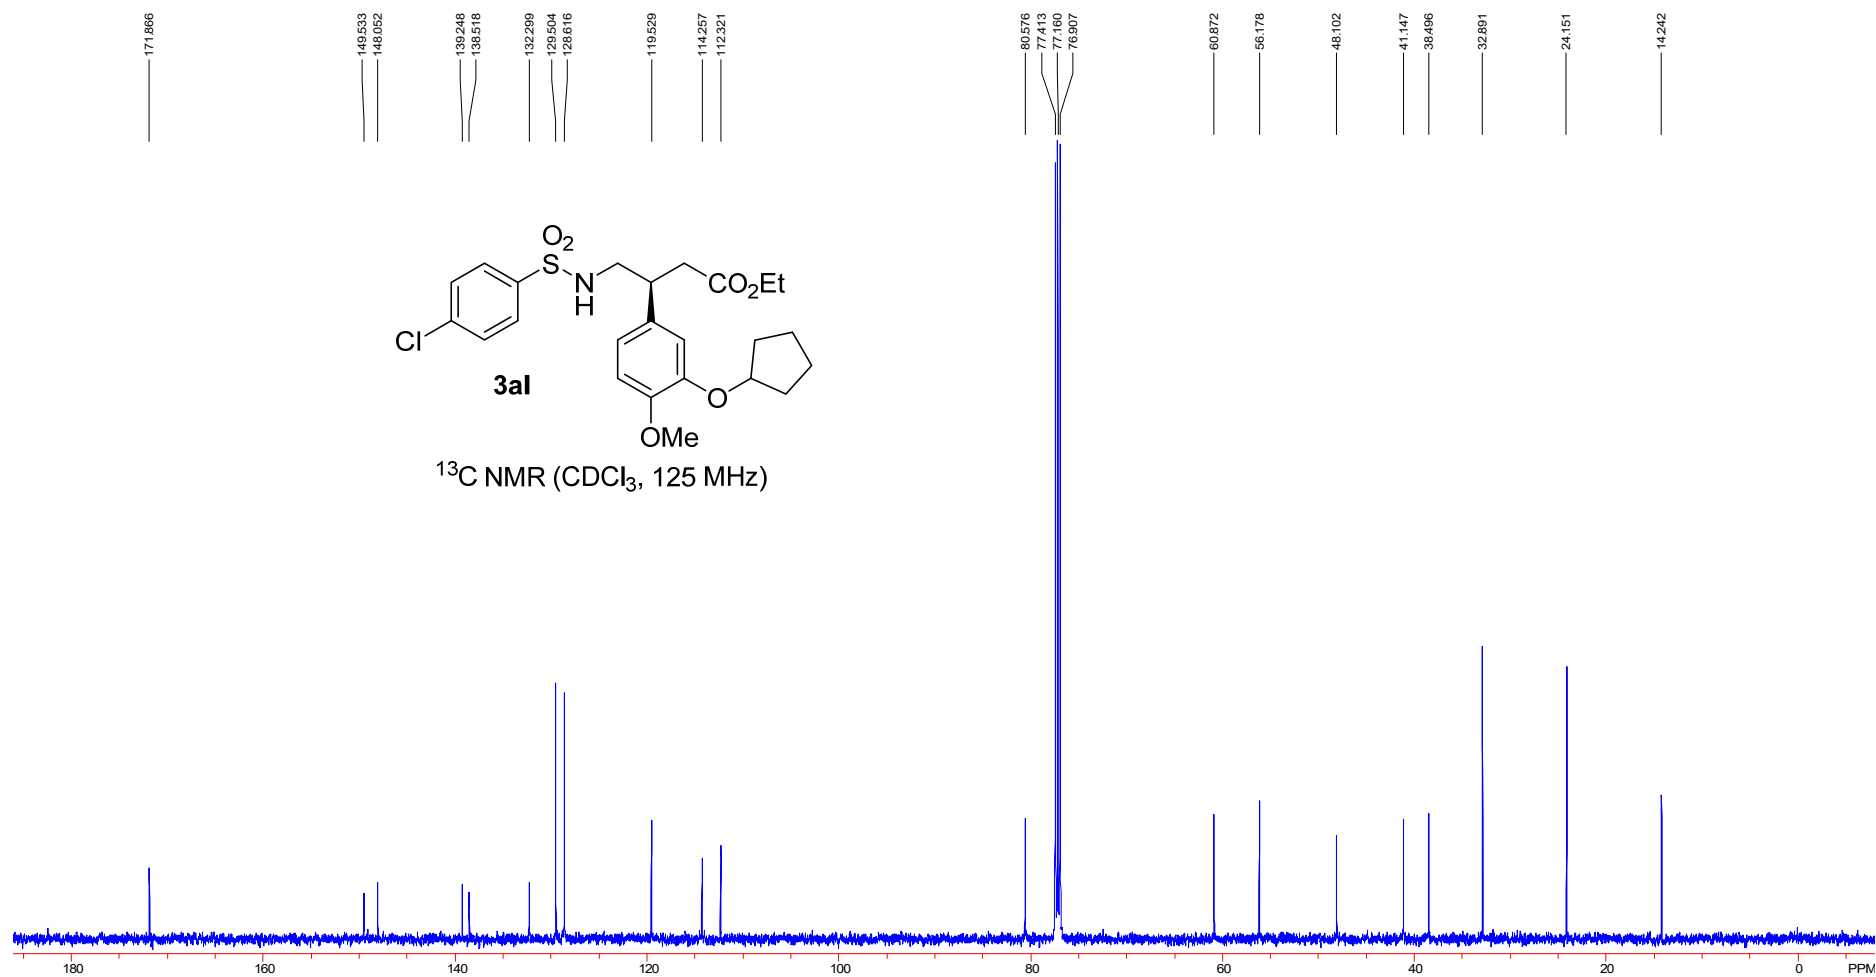

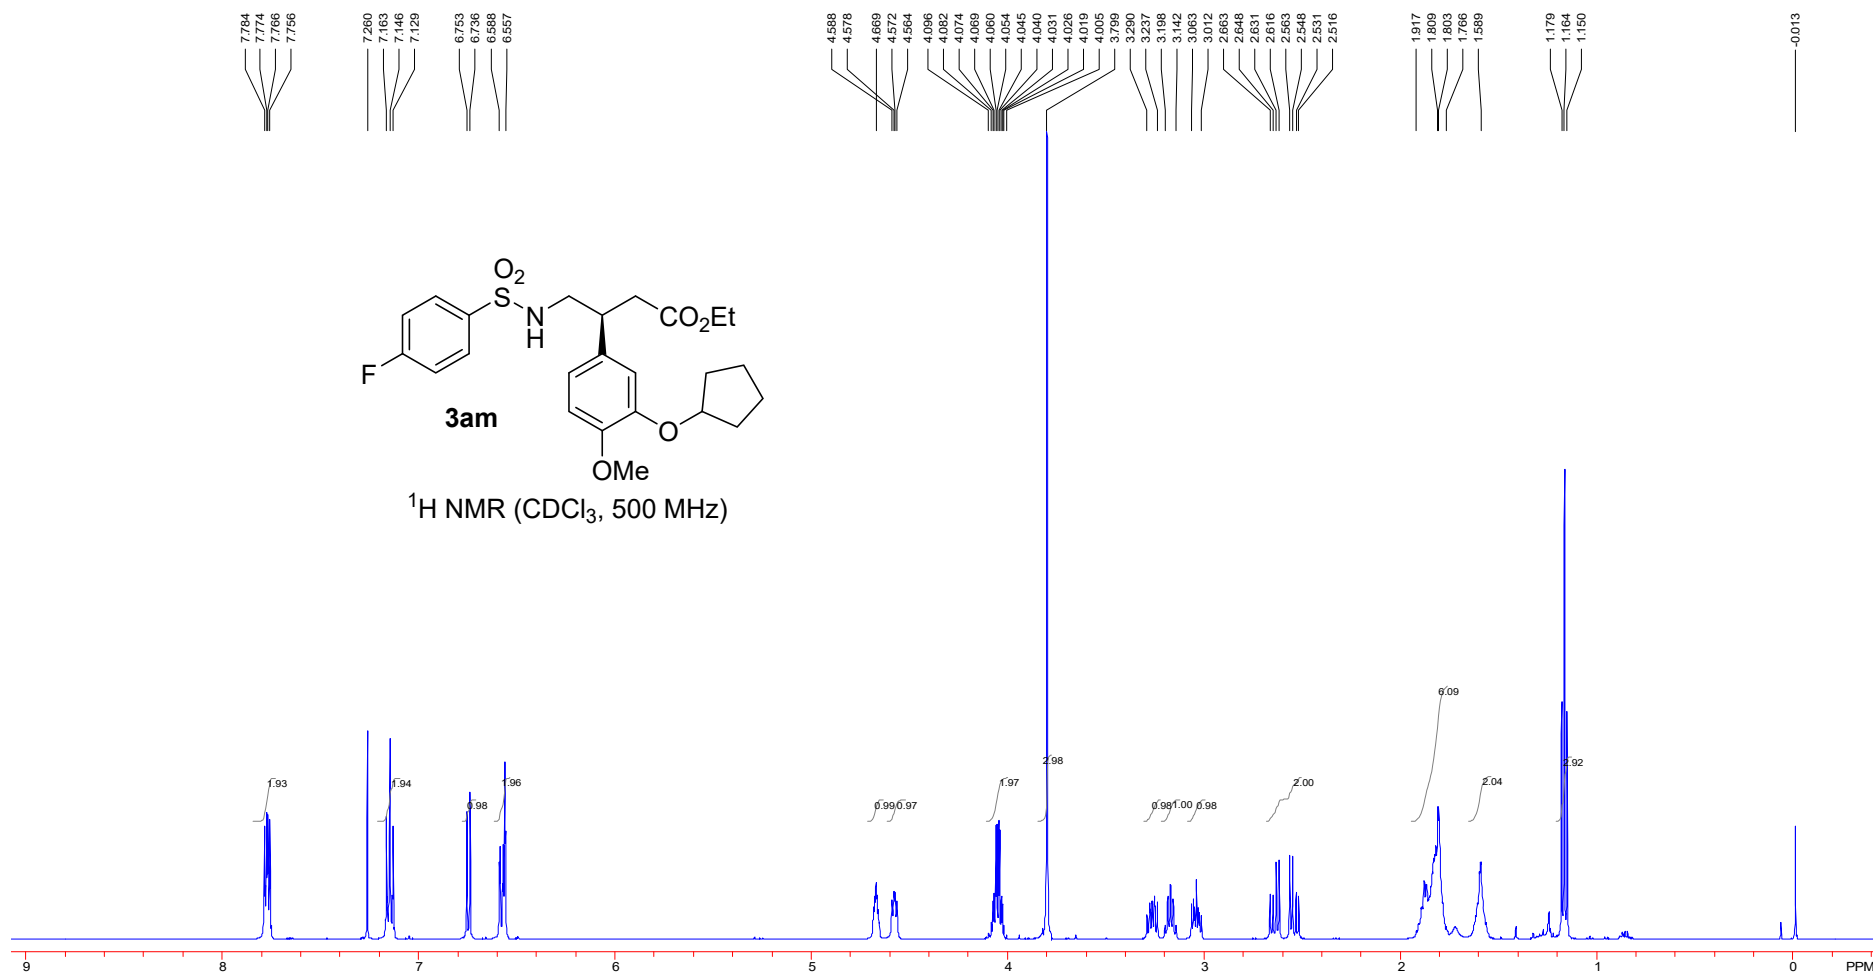

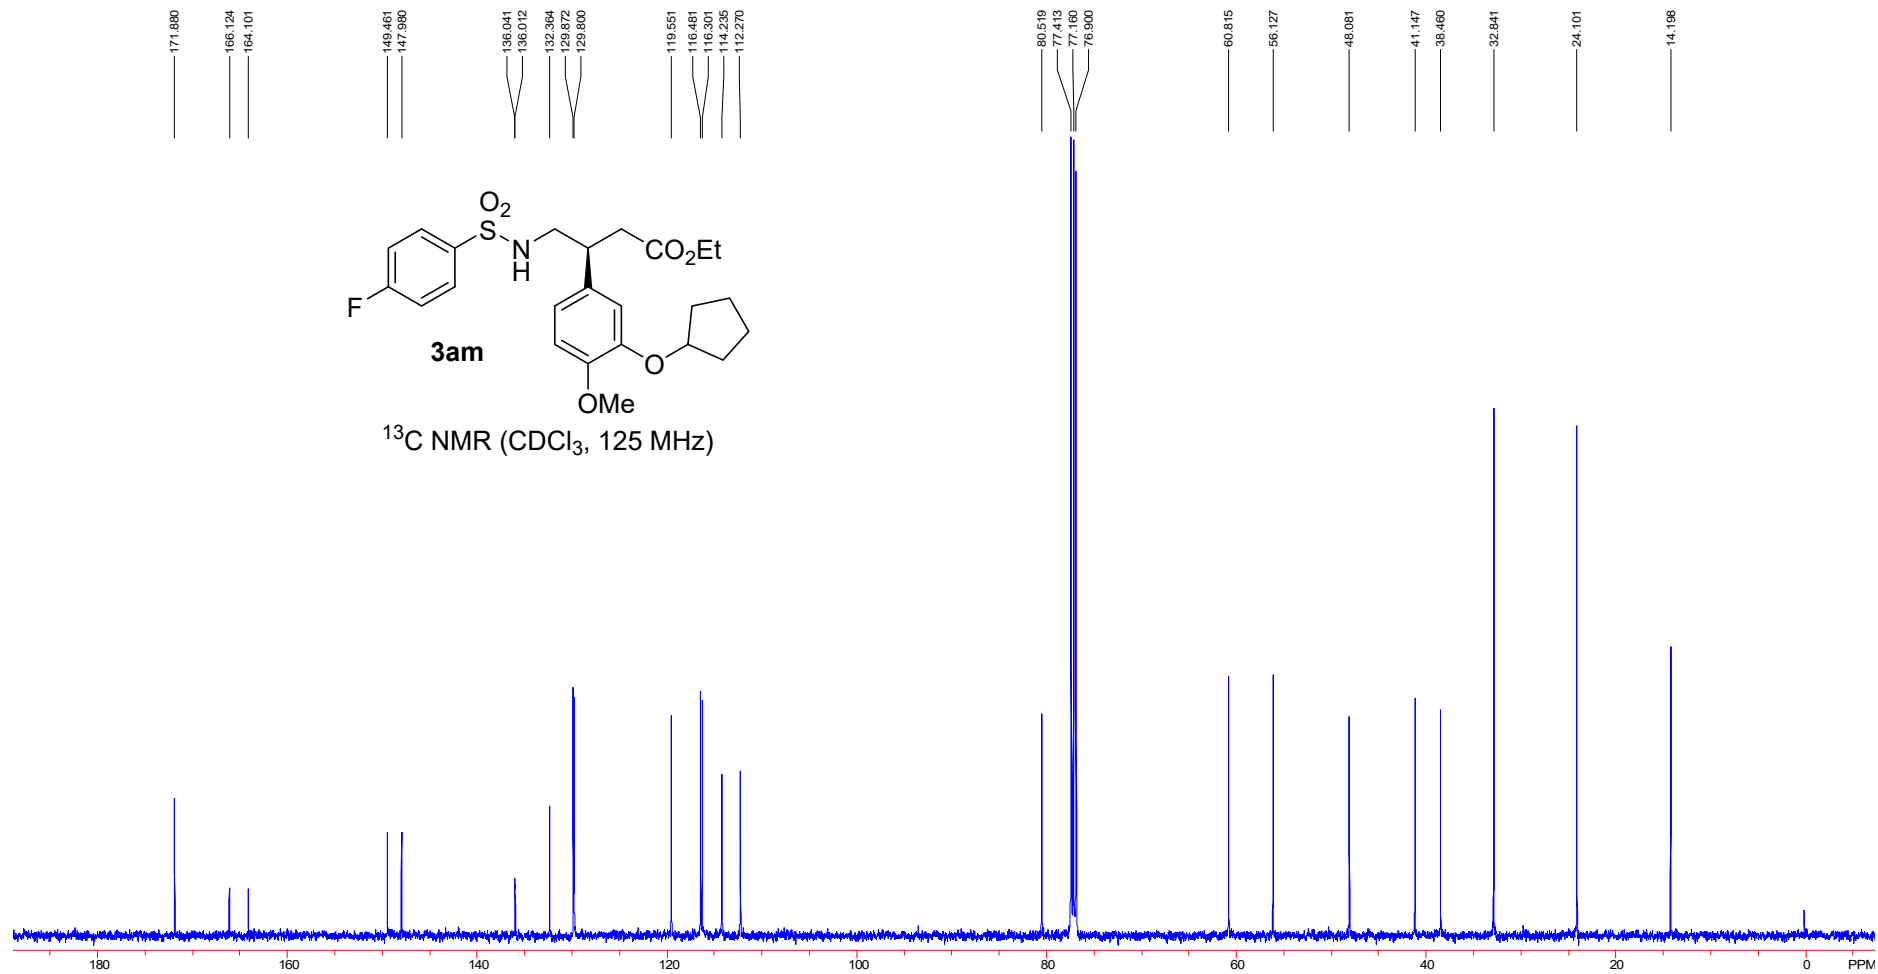

7.676  
7.659  
7.477  
7.461  
7.362  
7.347  
7.260  
7.252  
7.175

6.445

4.784  
4.170  
4.157

4.149  
4.135  
4.127  
4.122  
4.113  
4.108  
4.098  
4.094  
4.090  
4.073  
4.059  
3.969  
3.916  
3.377  
3.337  
3.331  
2.782  
2.766  
2.754

2.392

1.656

1.218  
1.204  
1.190

0.003

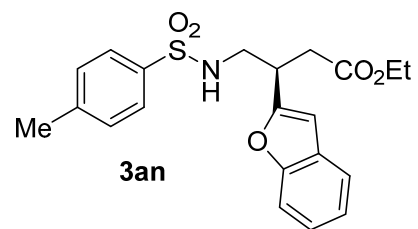

<sup>1</sup>H NMR (CDCl<sub>3</sub>, 500 MHz)

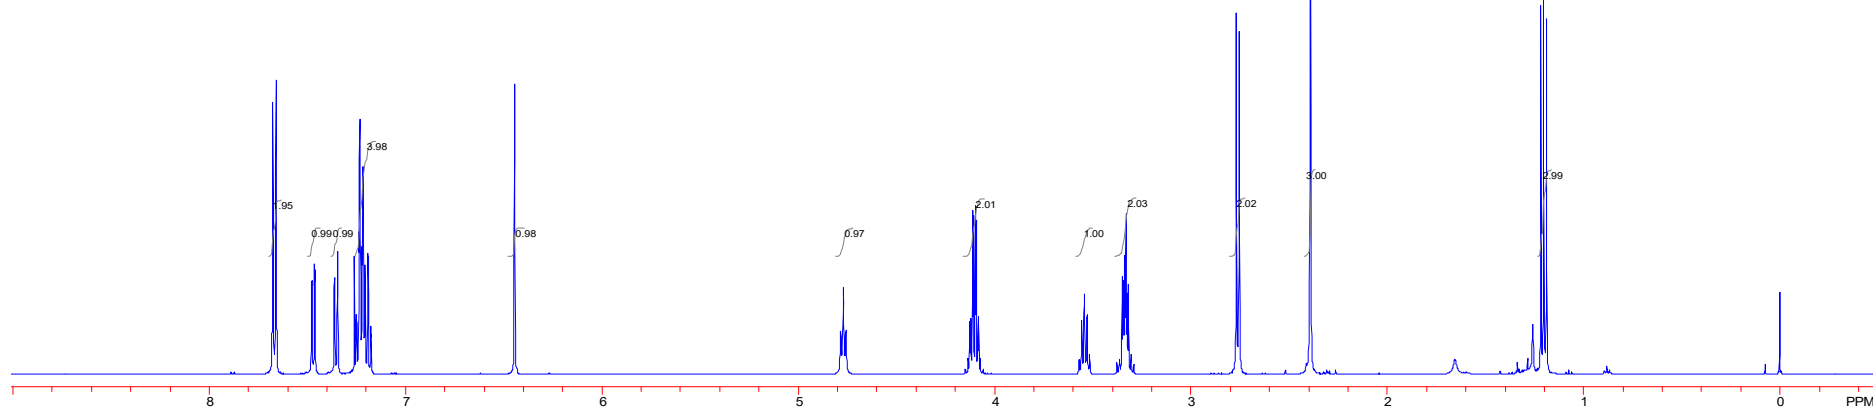

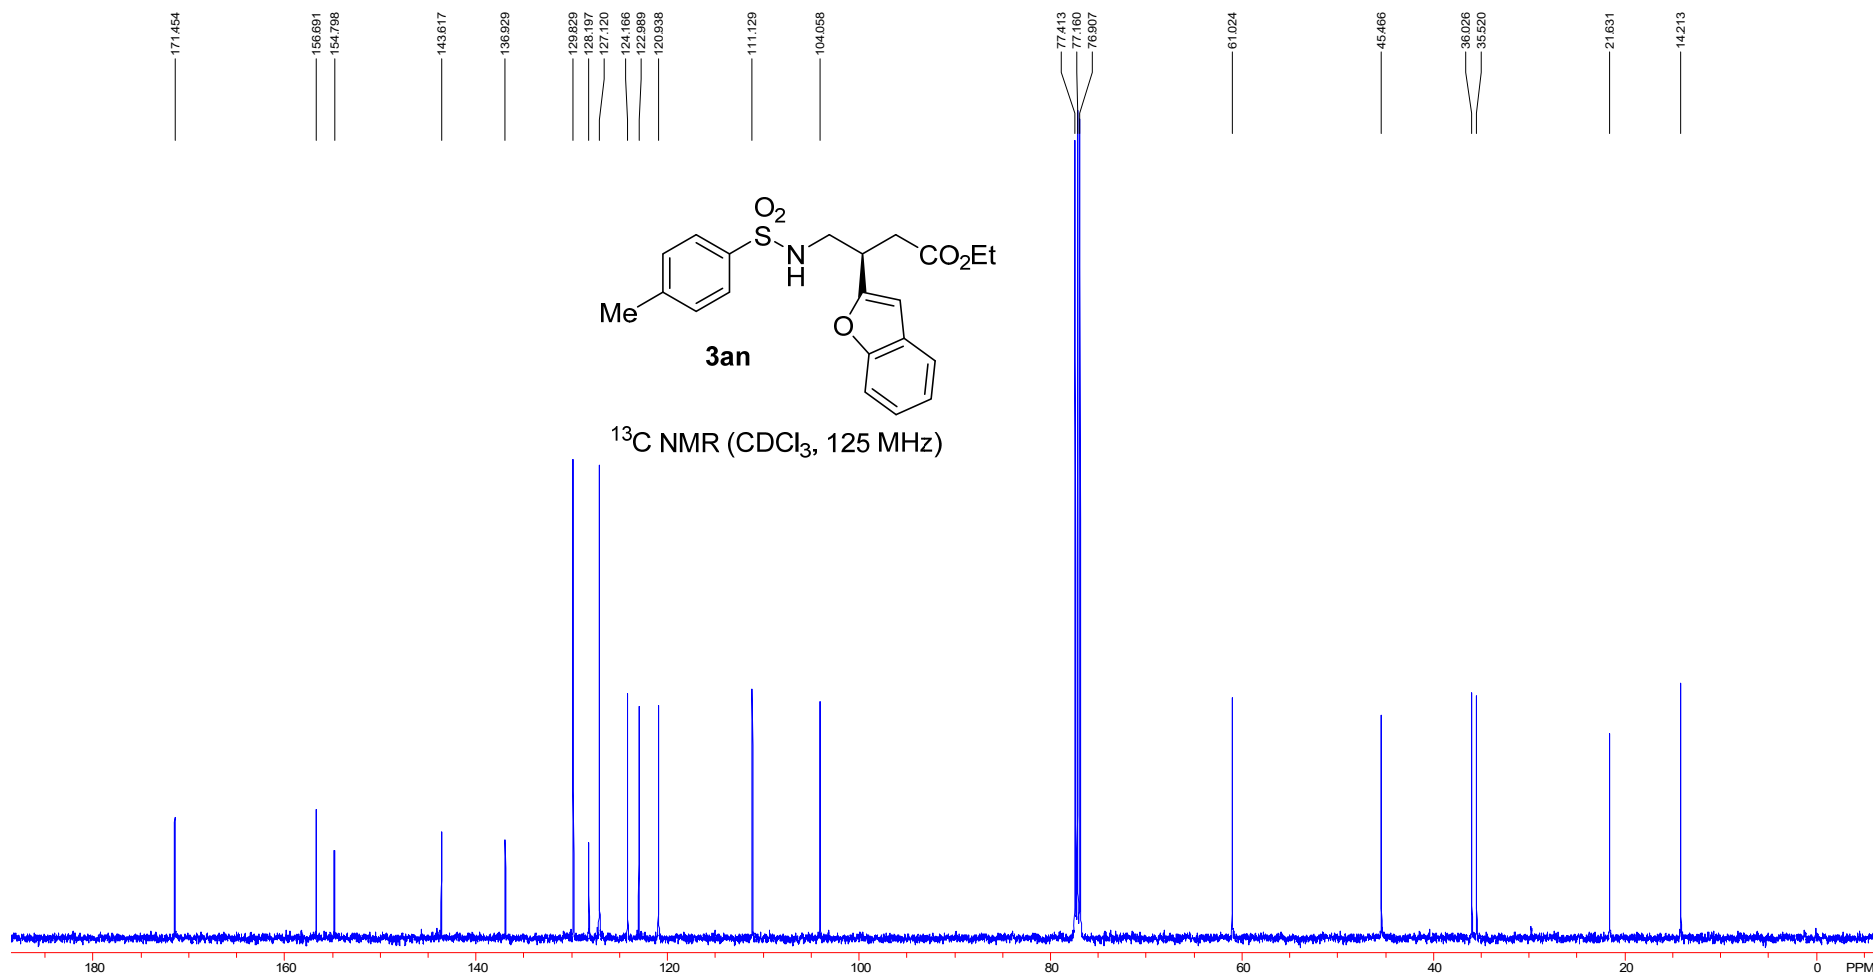

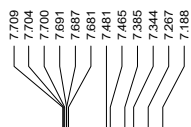

6.445

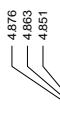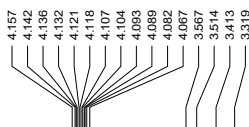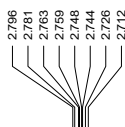

1.631

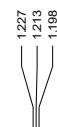

0.000

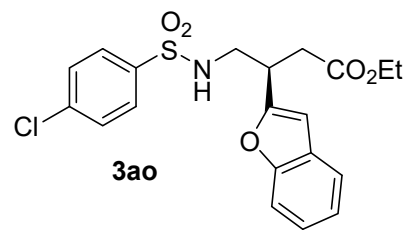

<sup>1</sup>H NMR (CDCl<sub>3</sub>, 500 MHz)

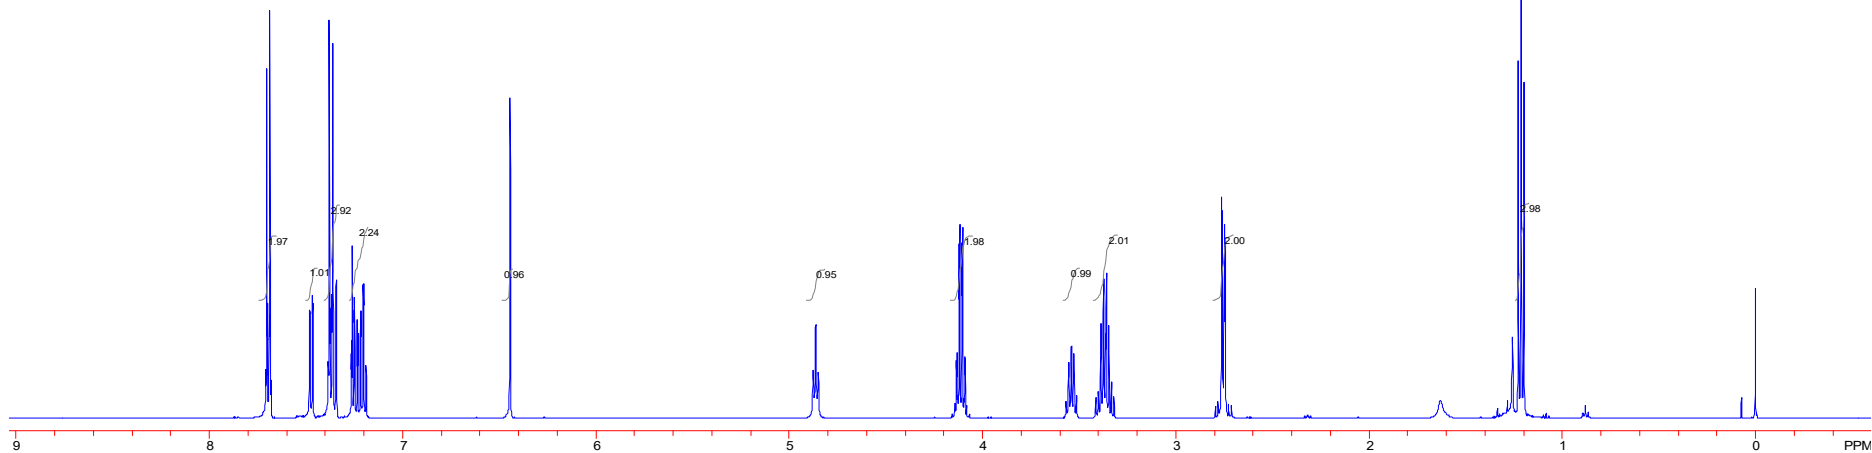

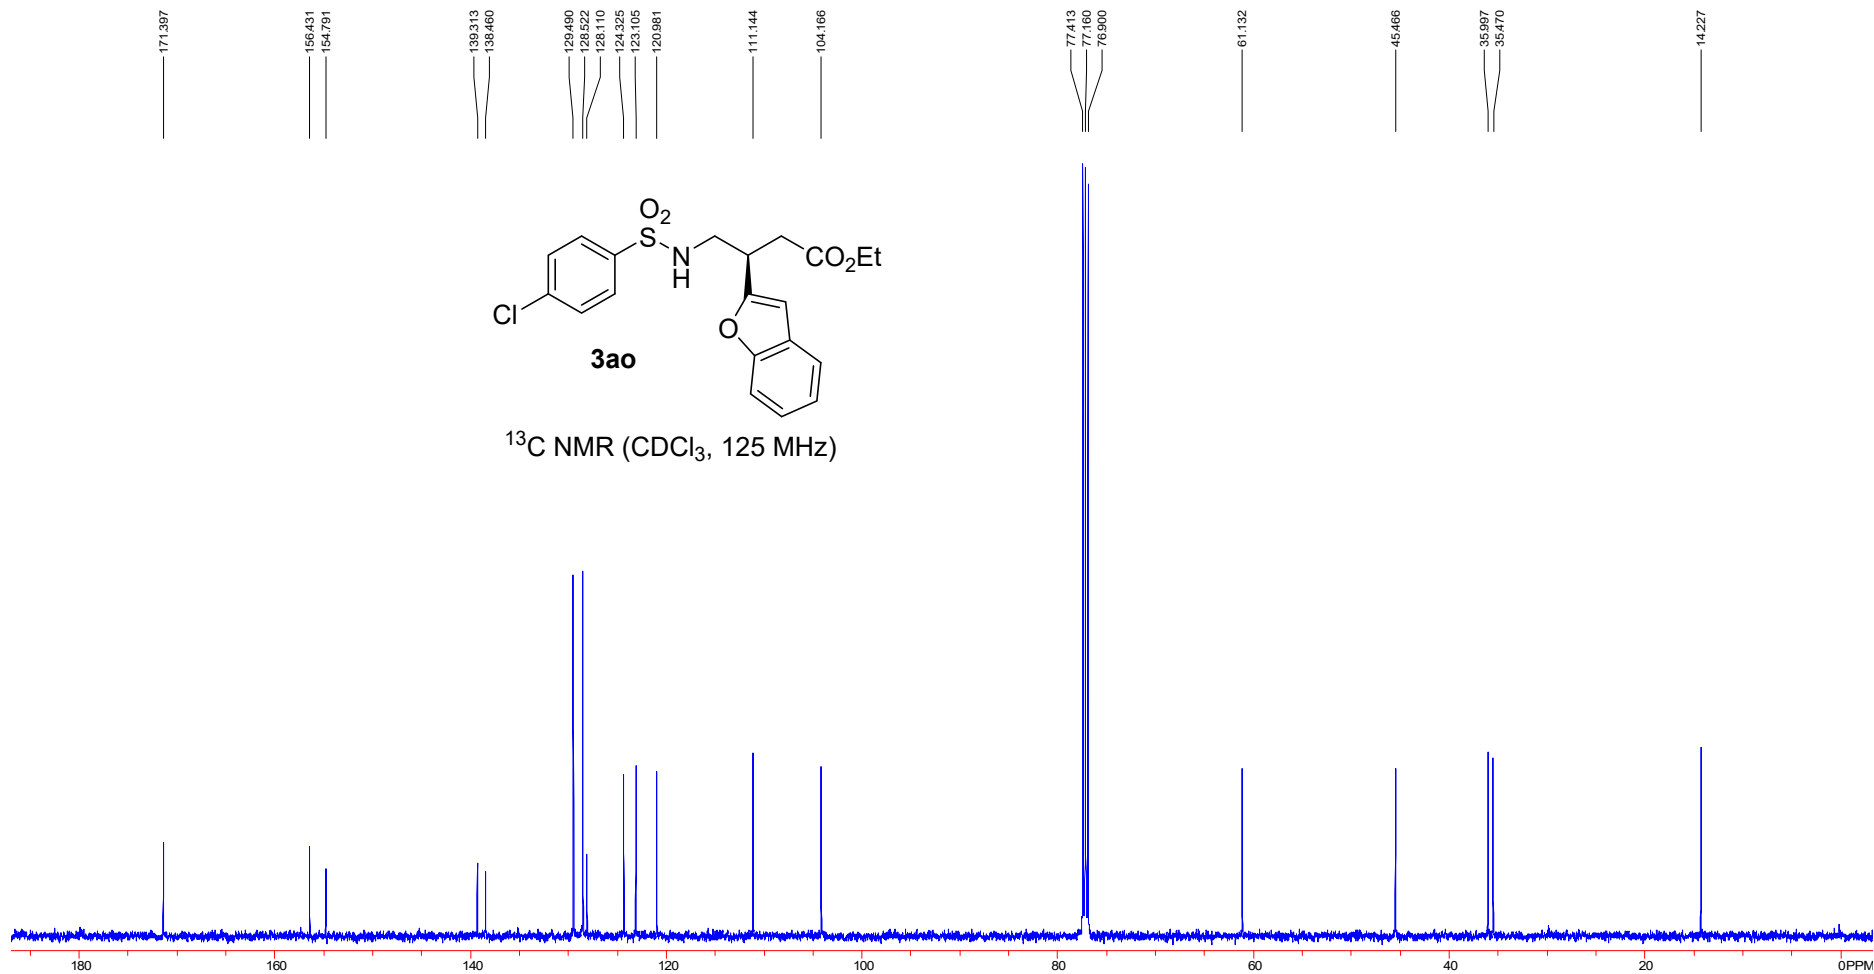



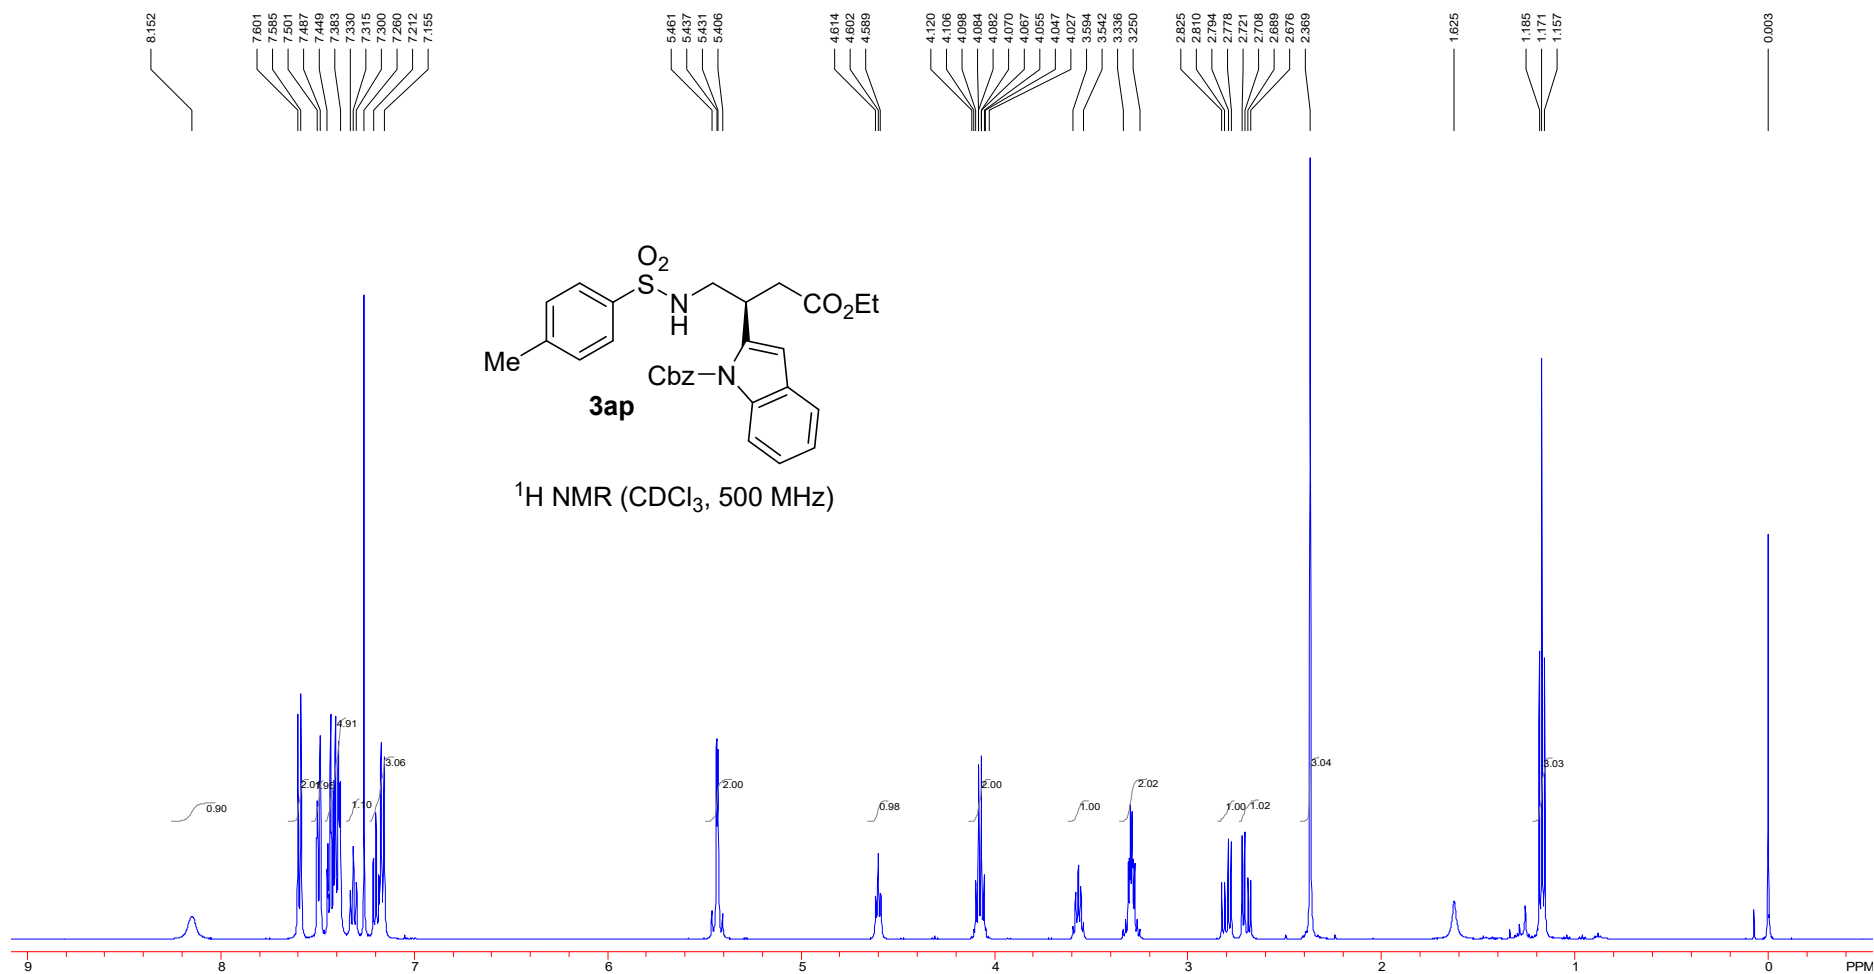

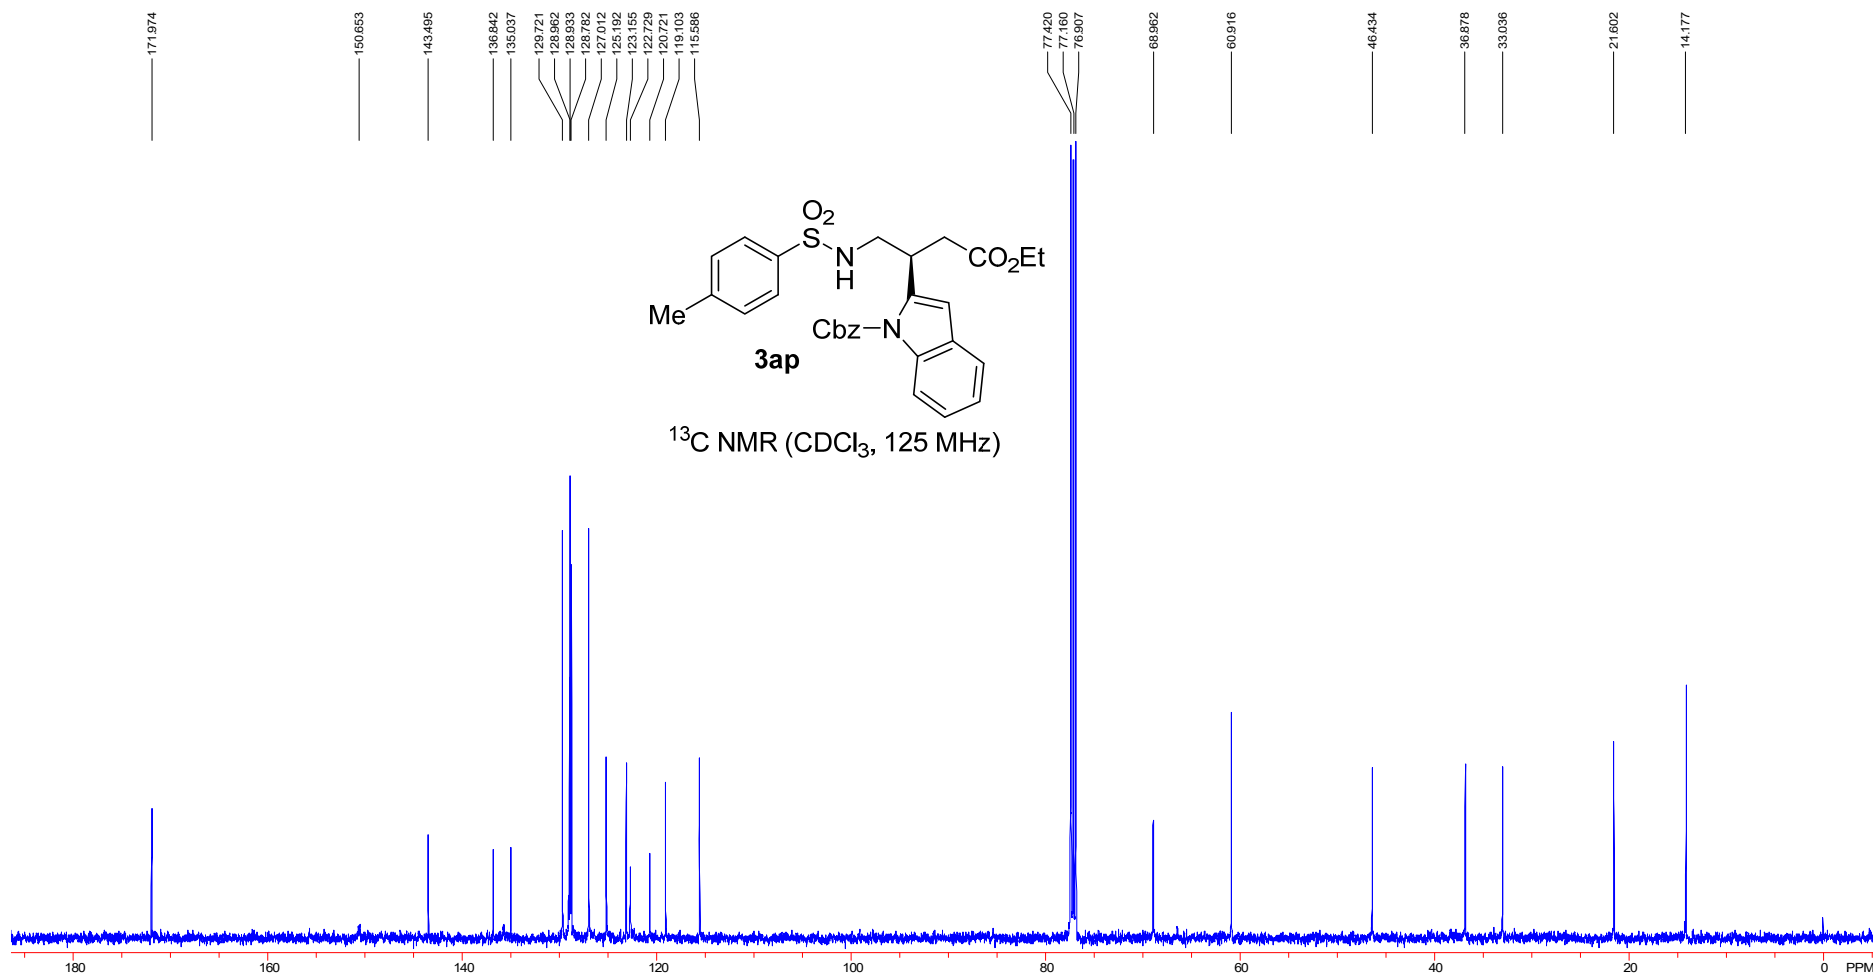

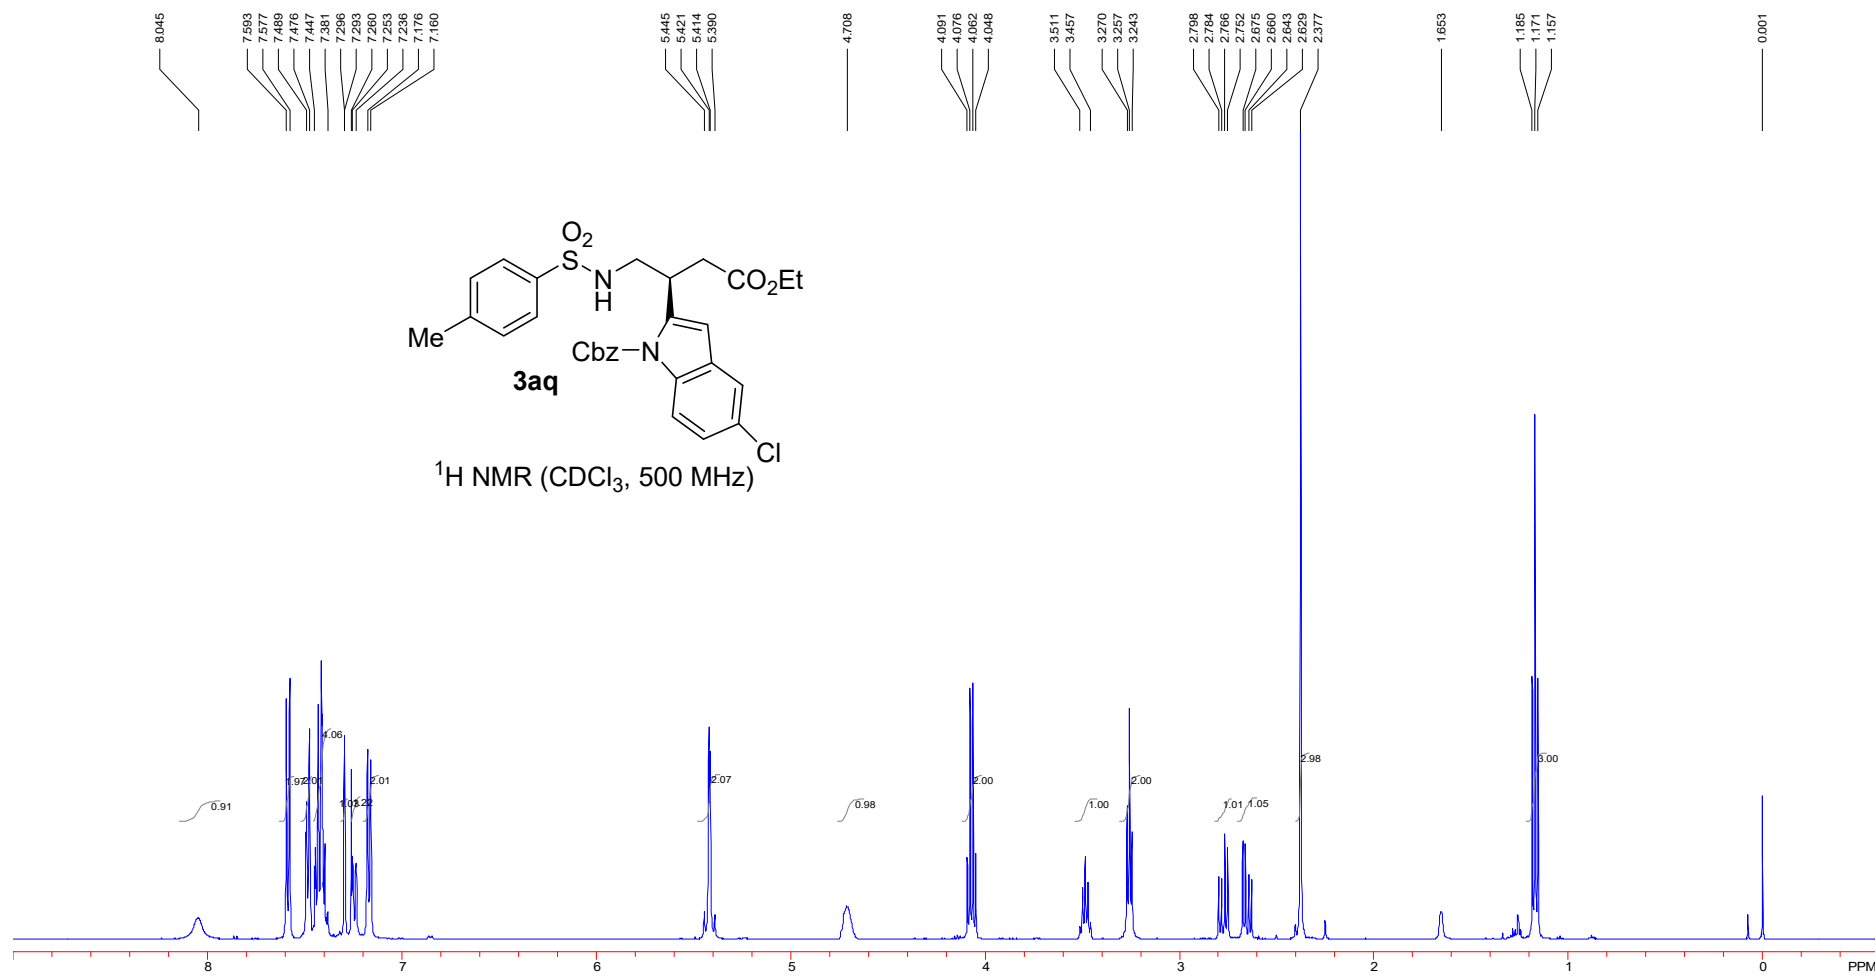

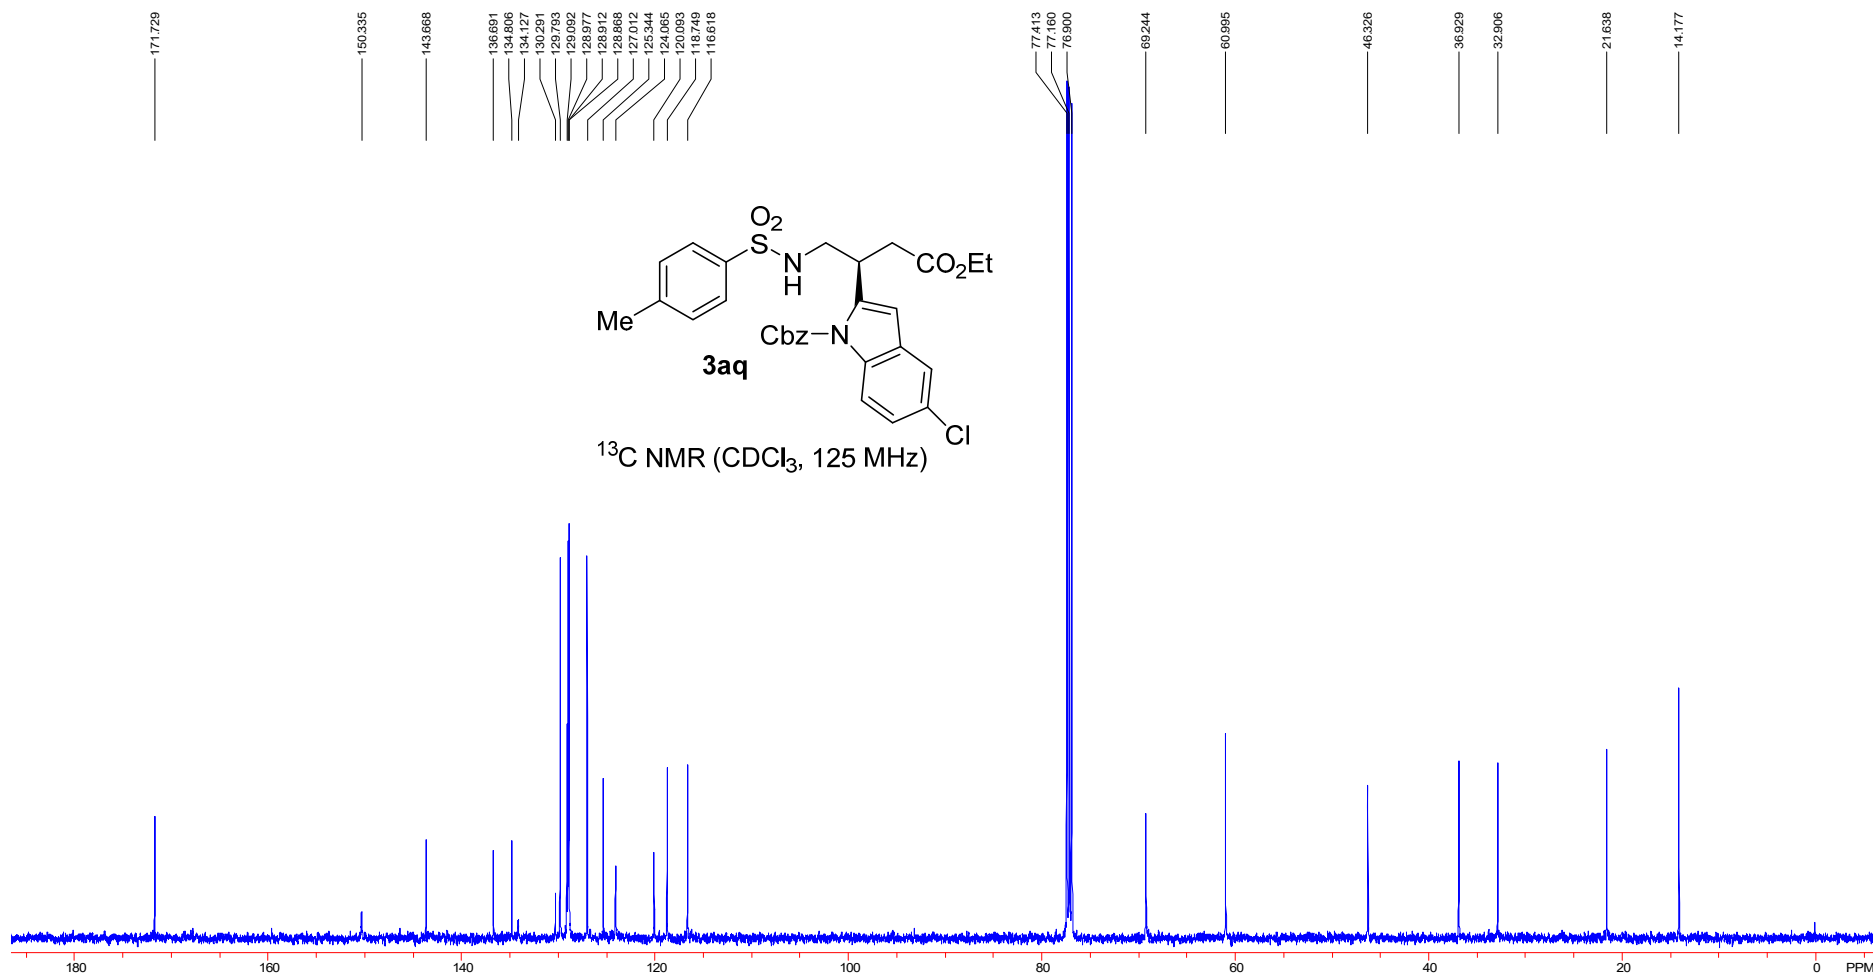

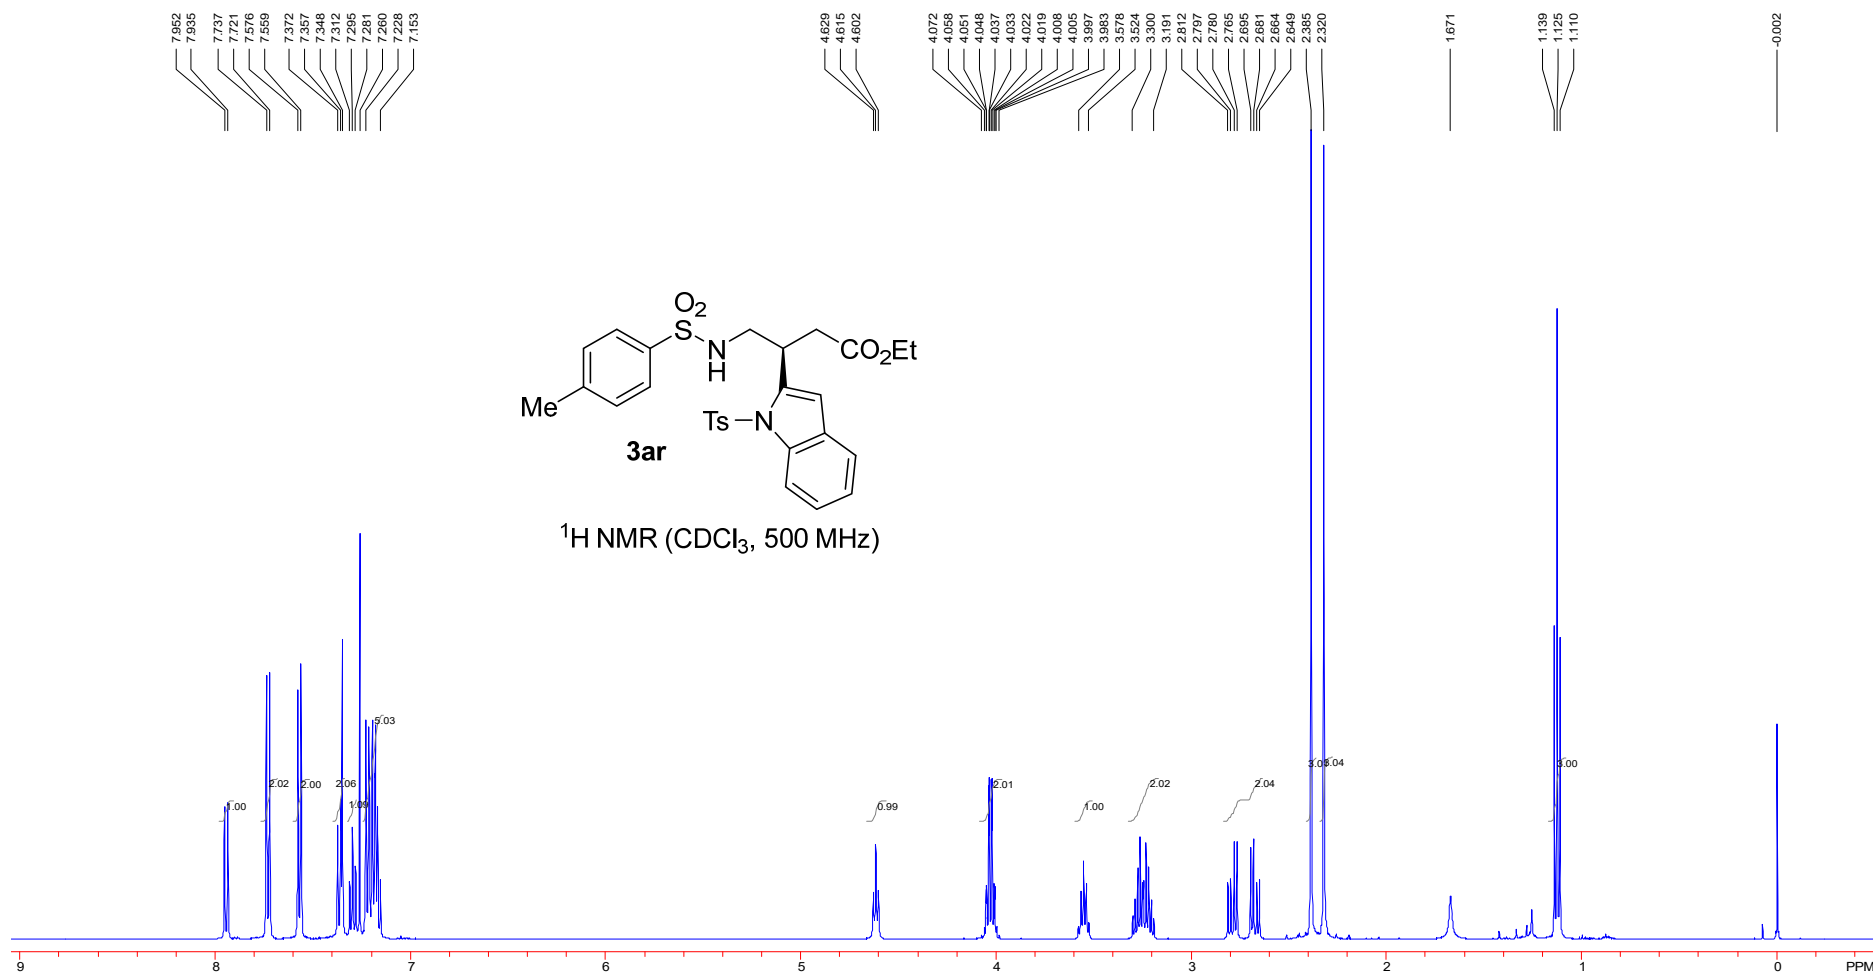

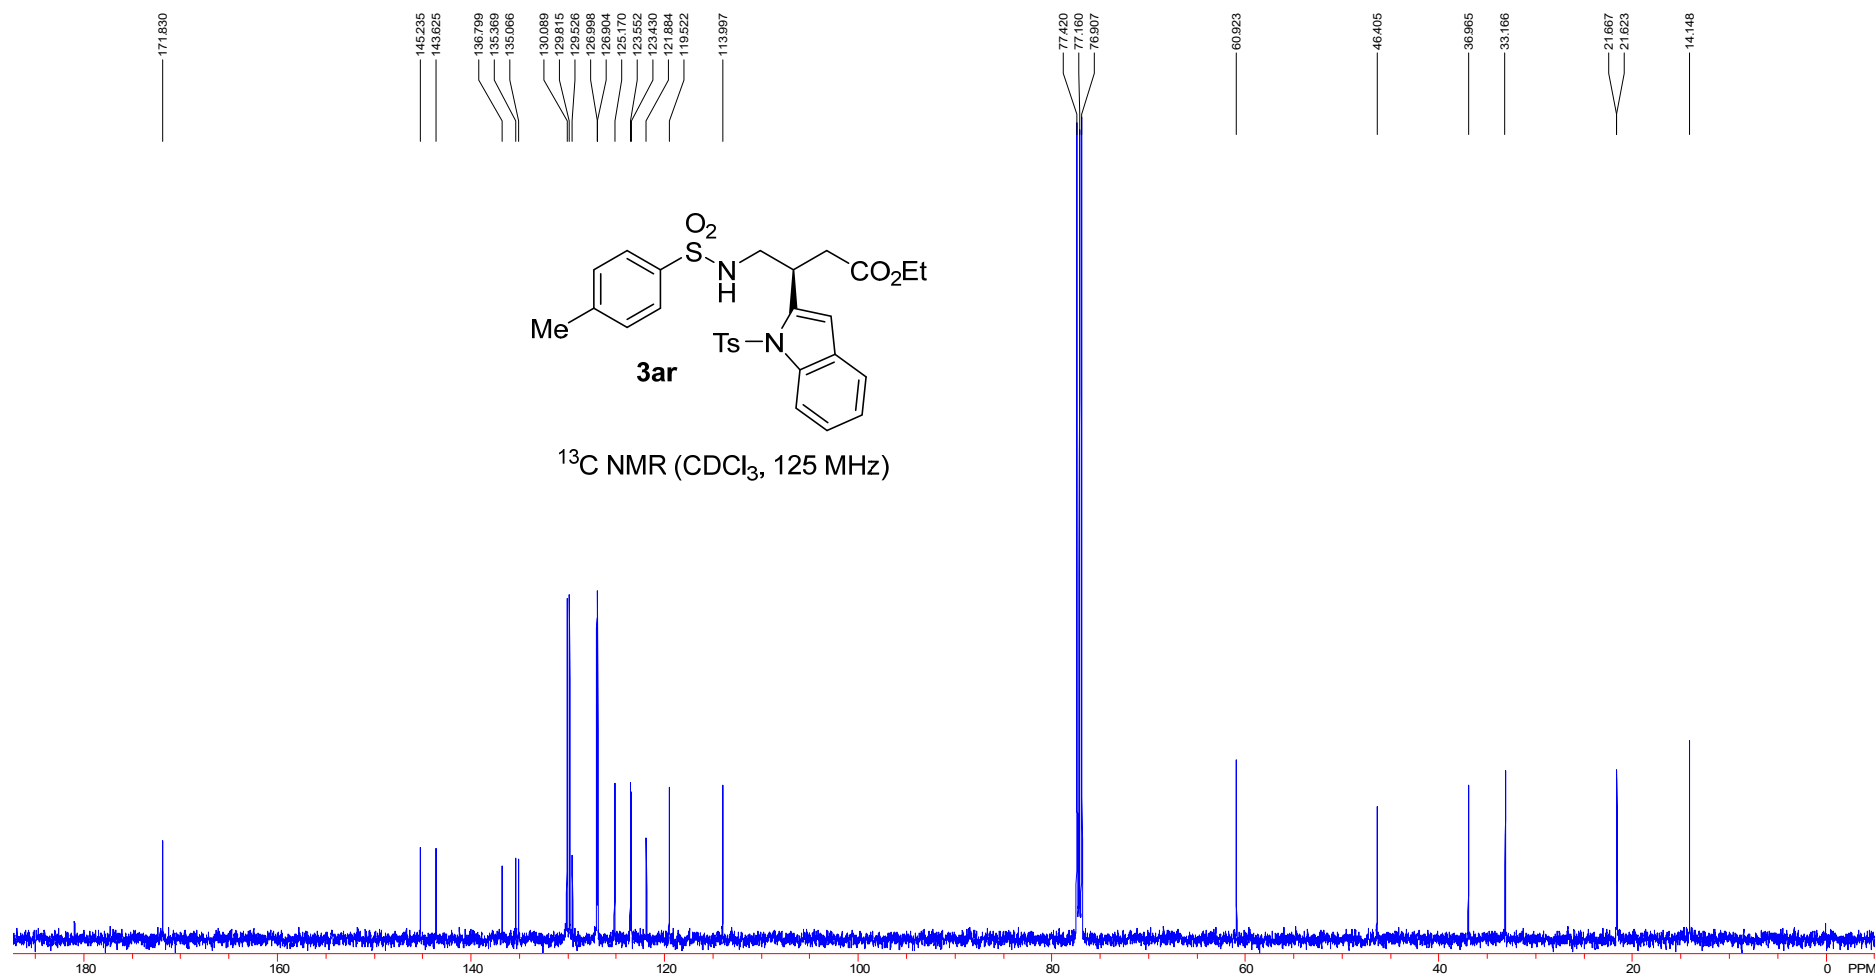

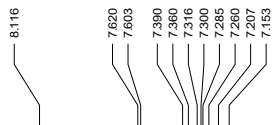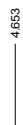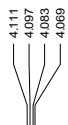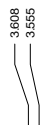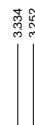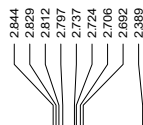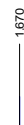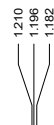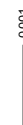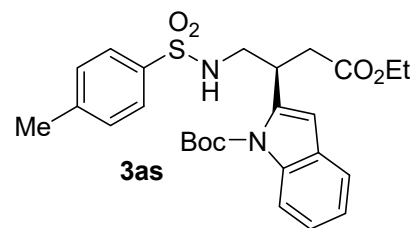

<sup>1</sup>H NMR (CDCl<sub>3</sub>, 500 MHz)

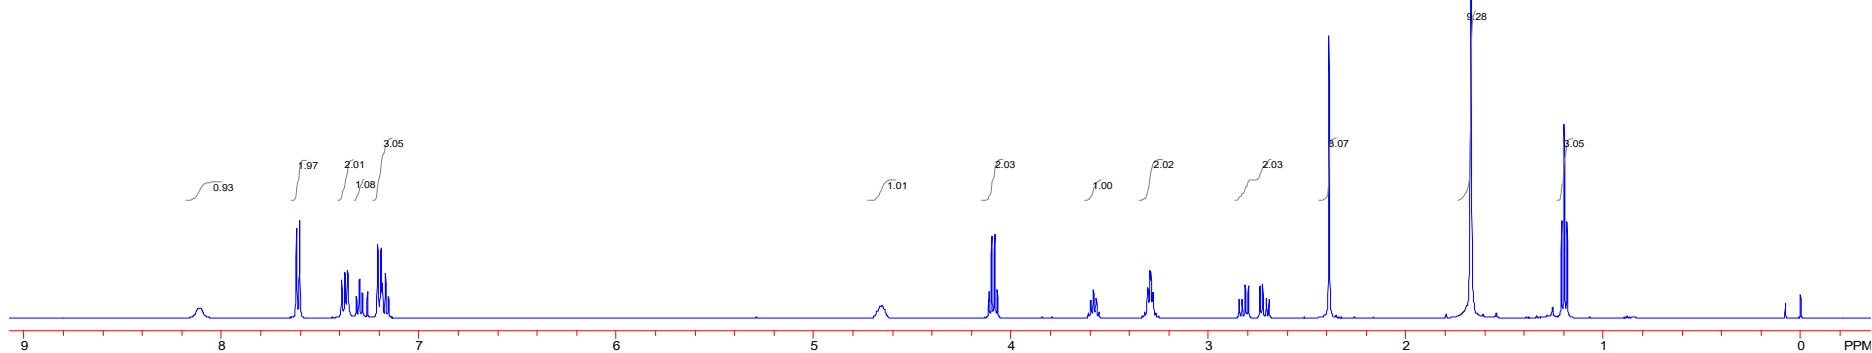

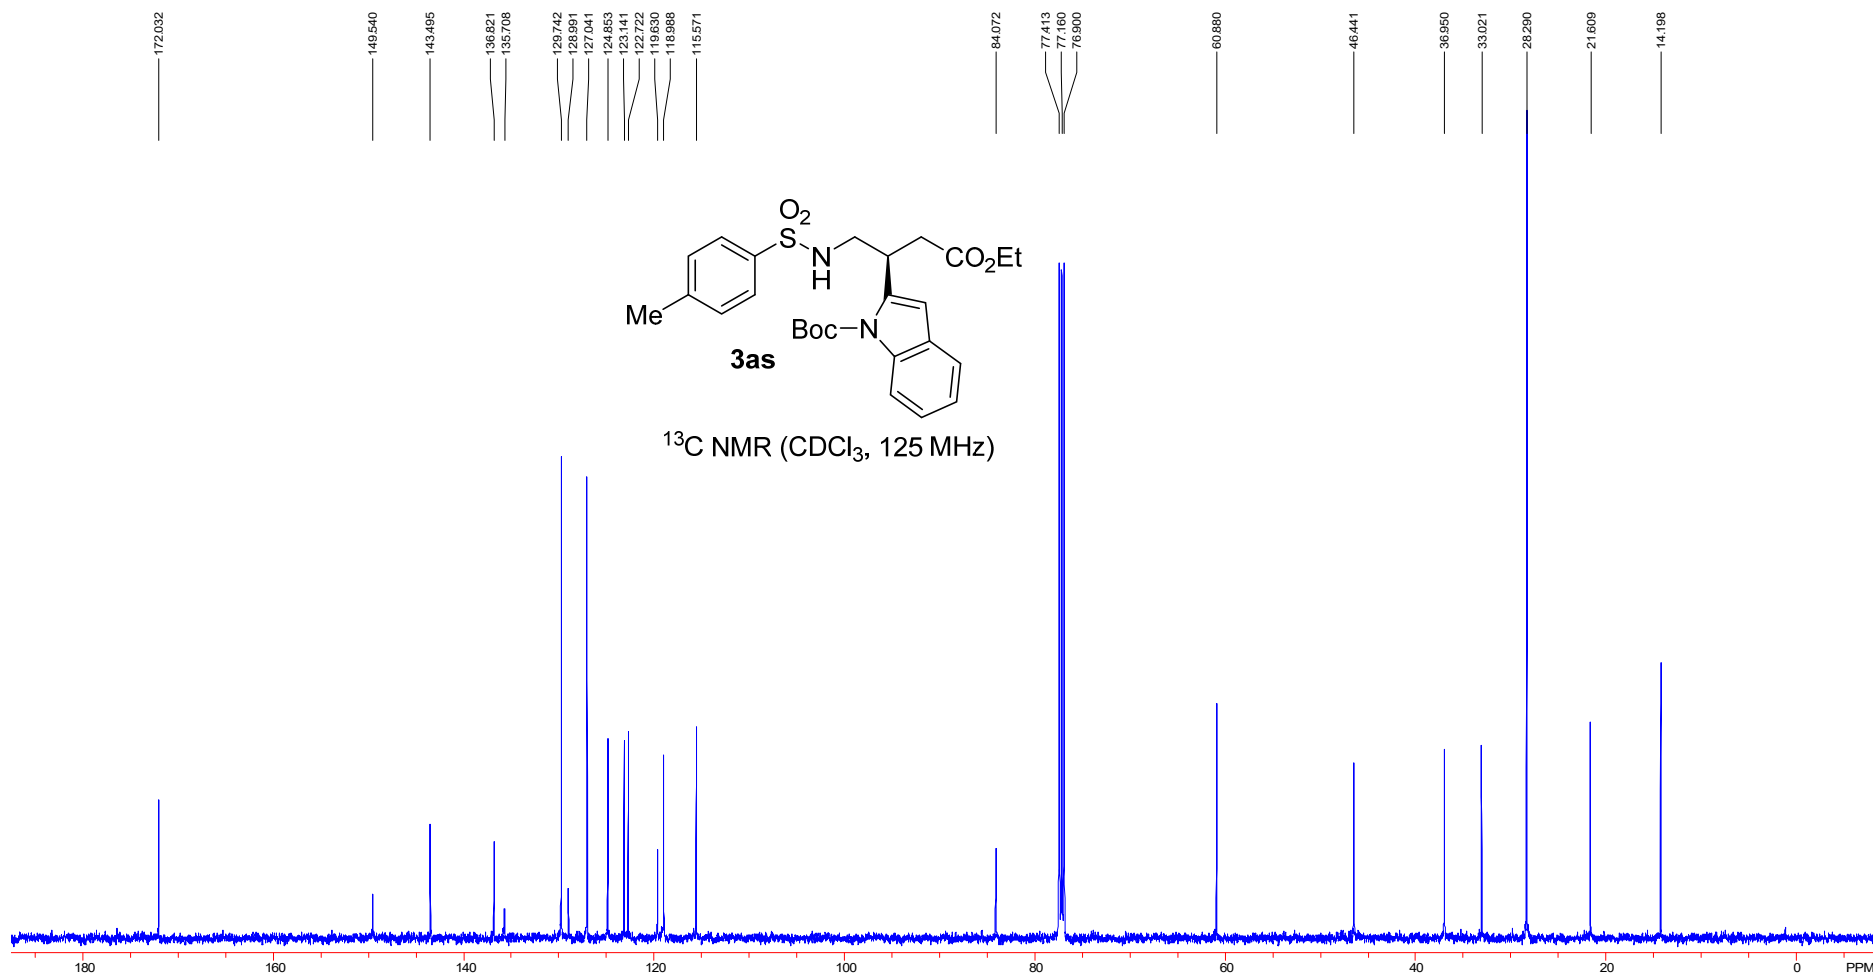



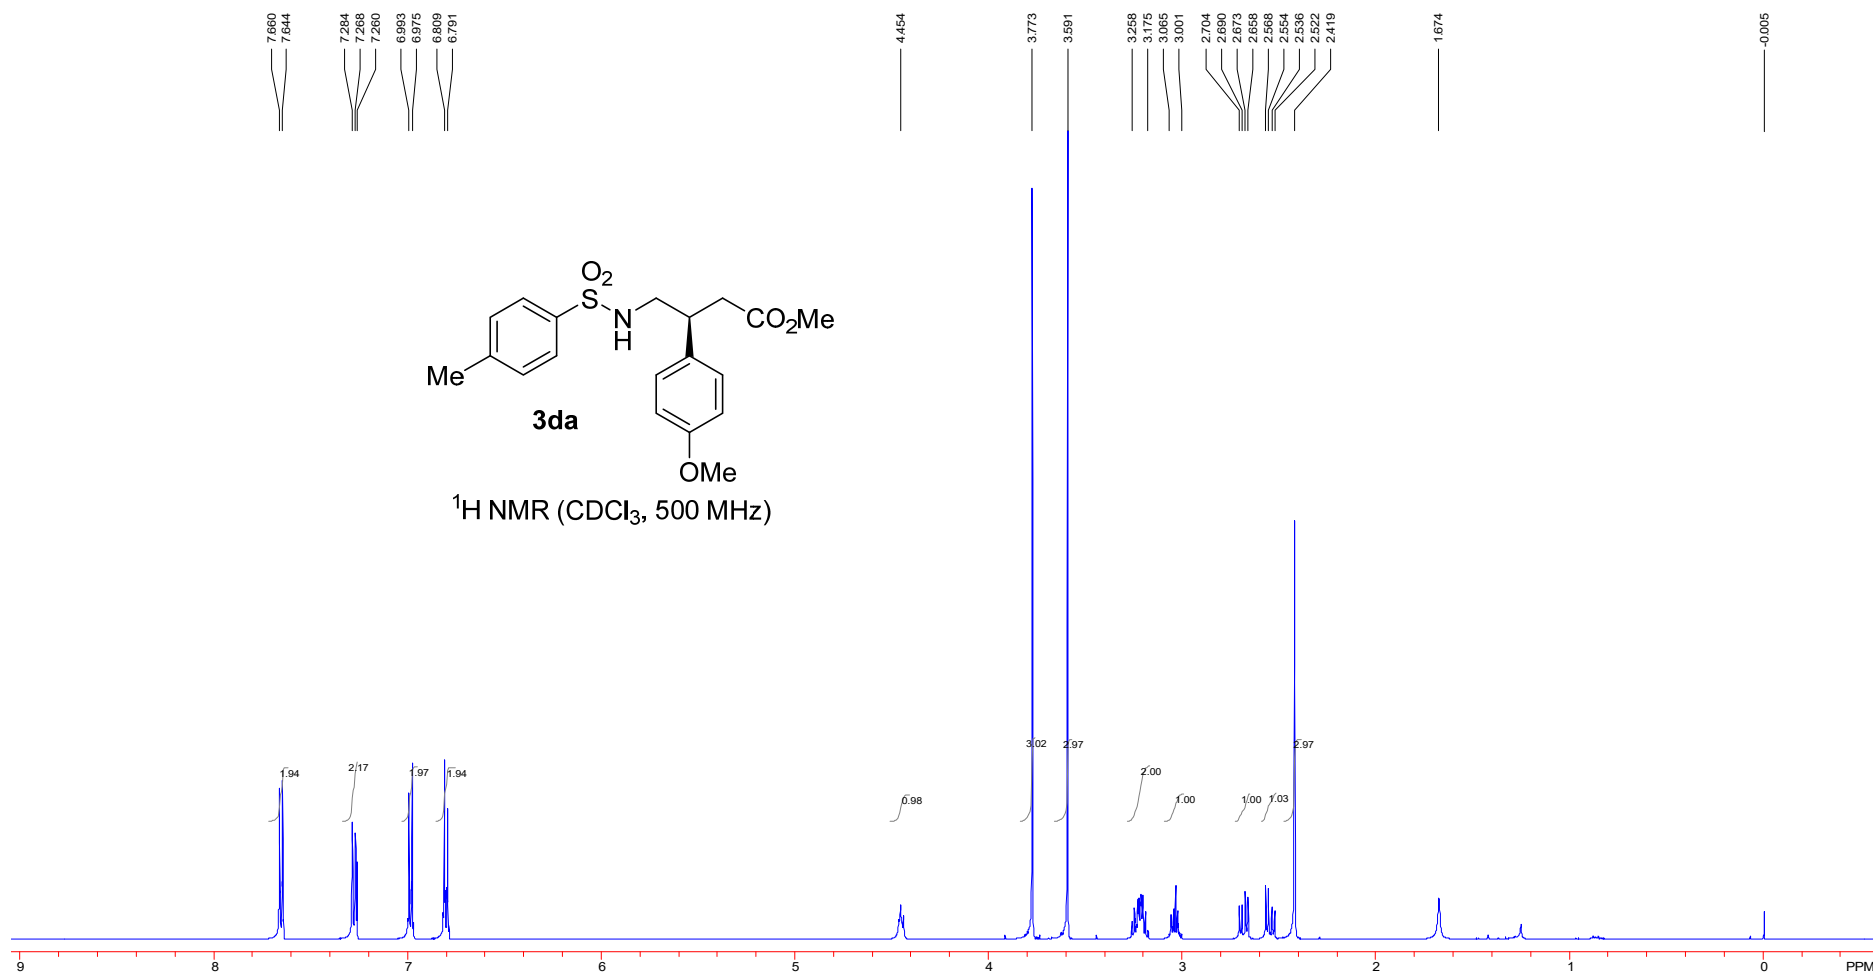

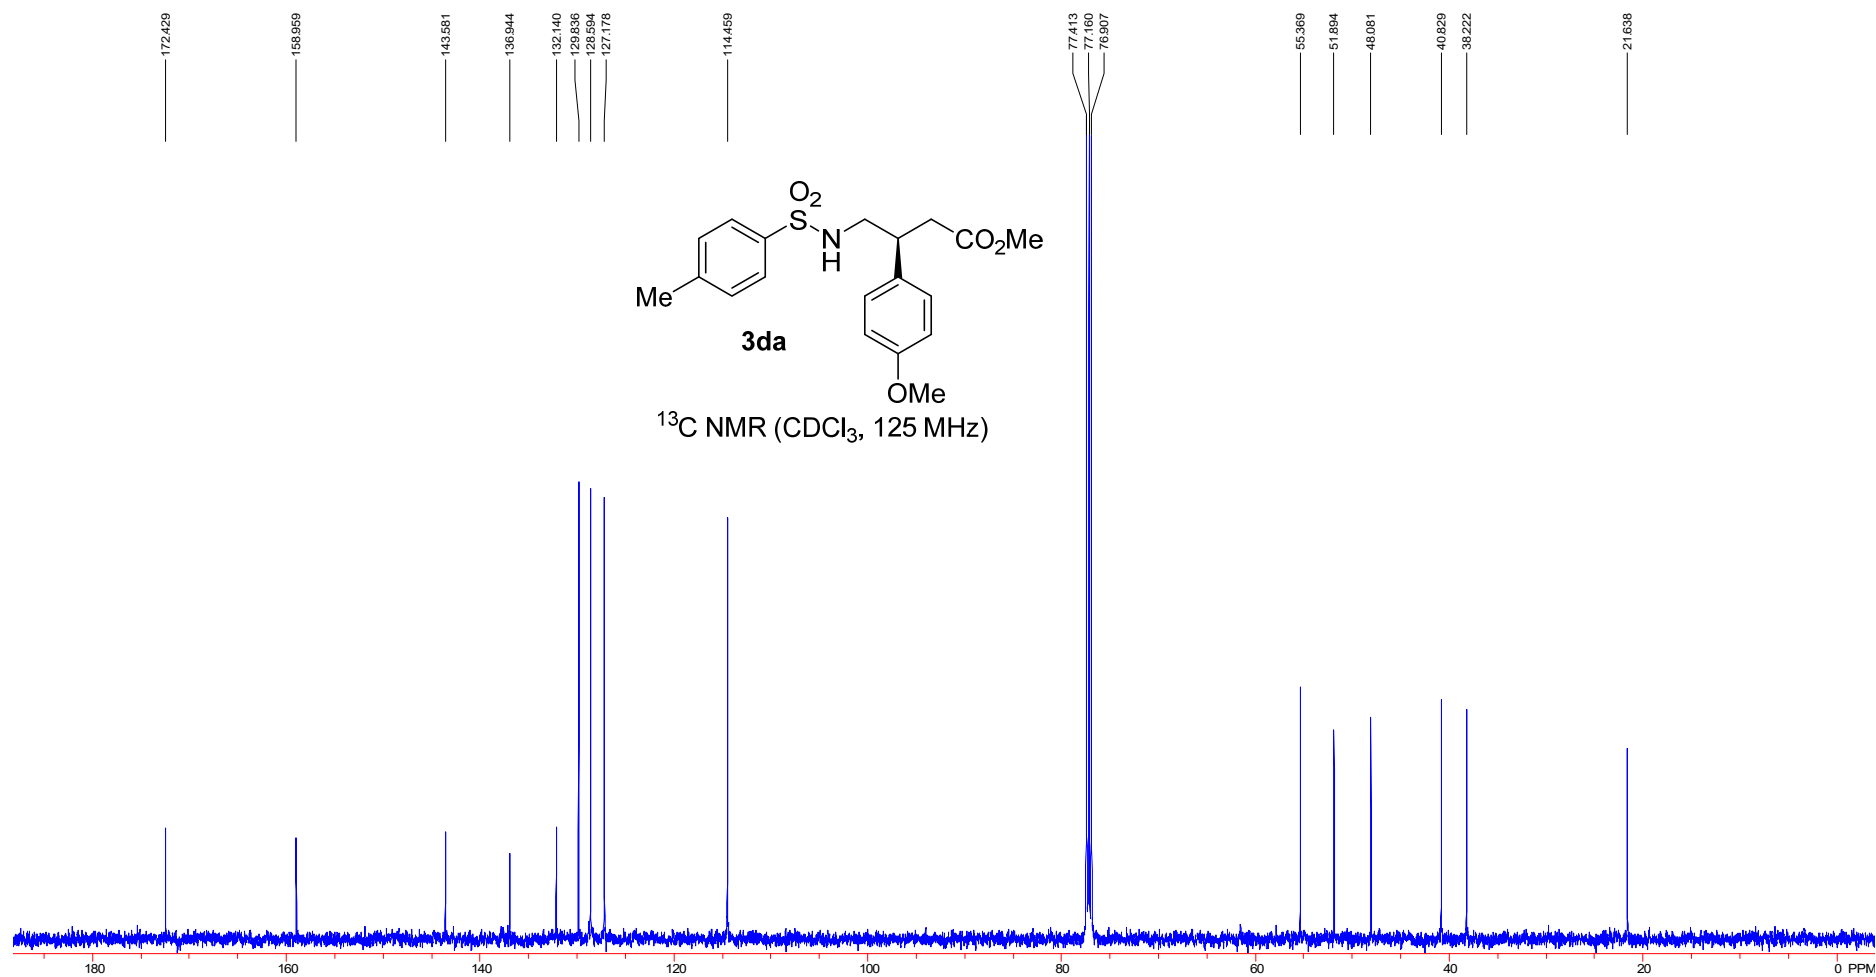

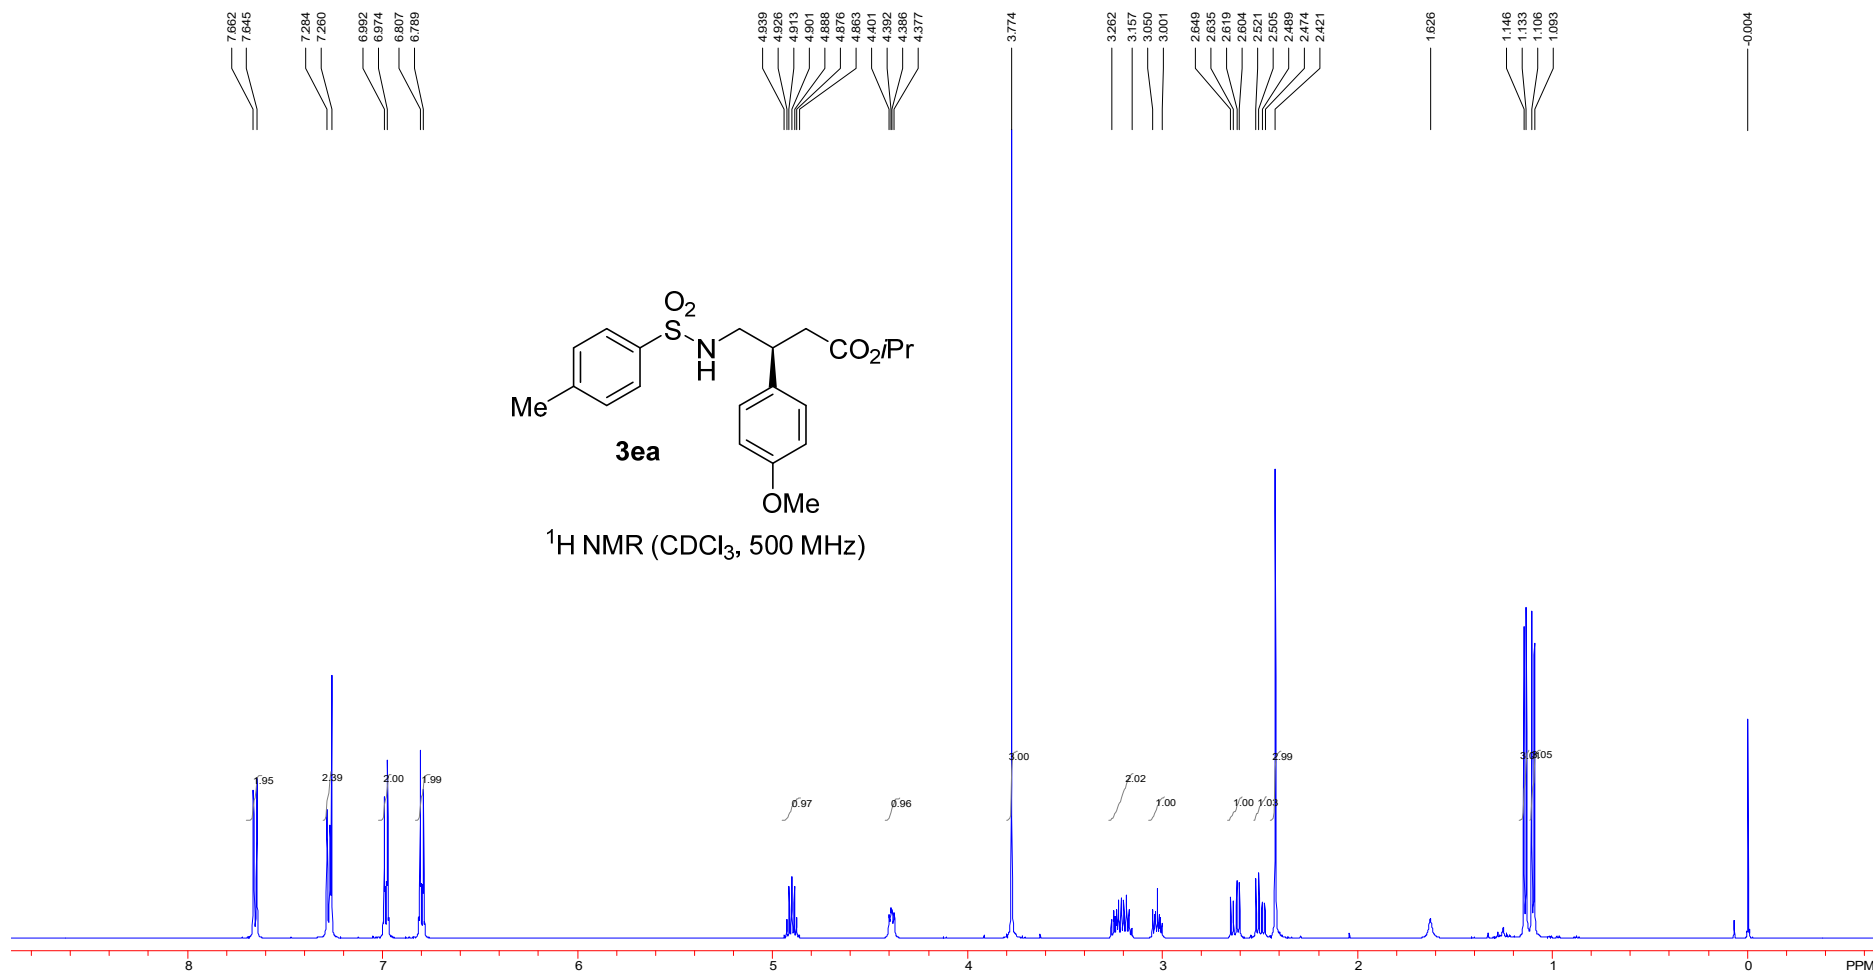

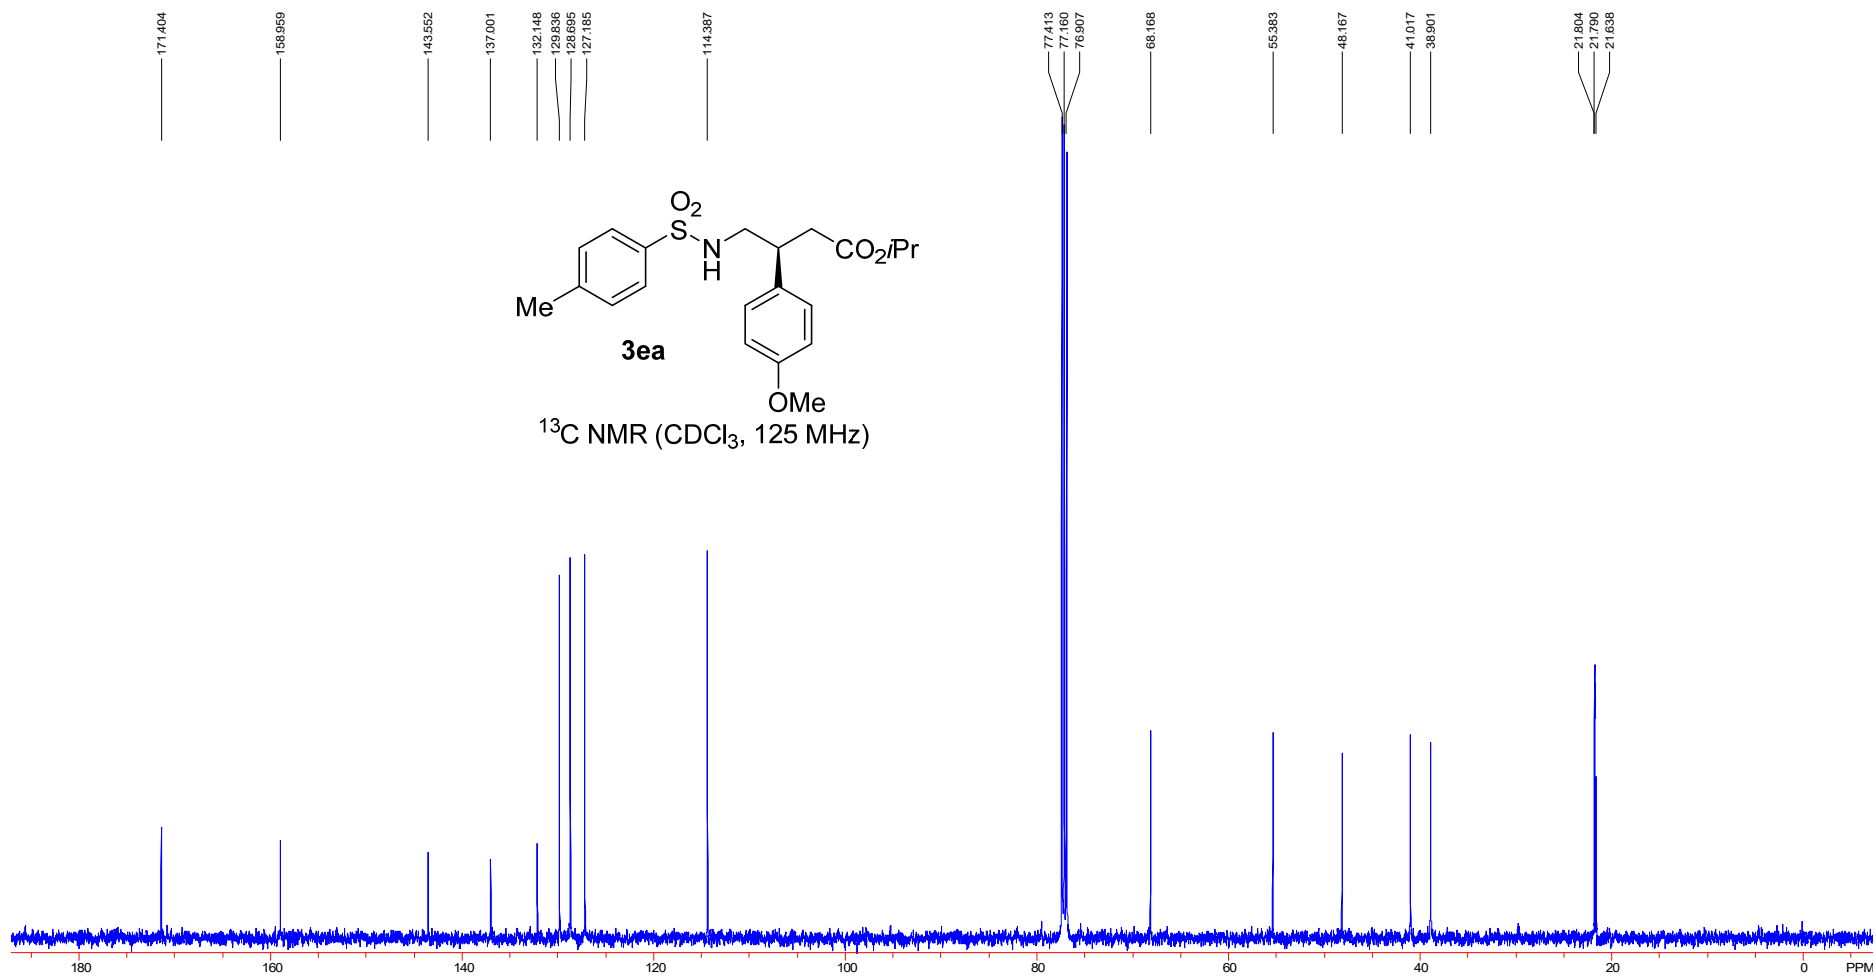

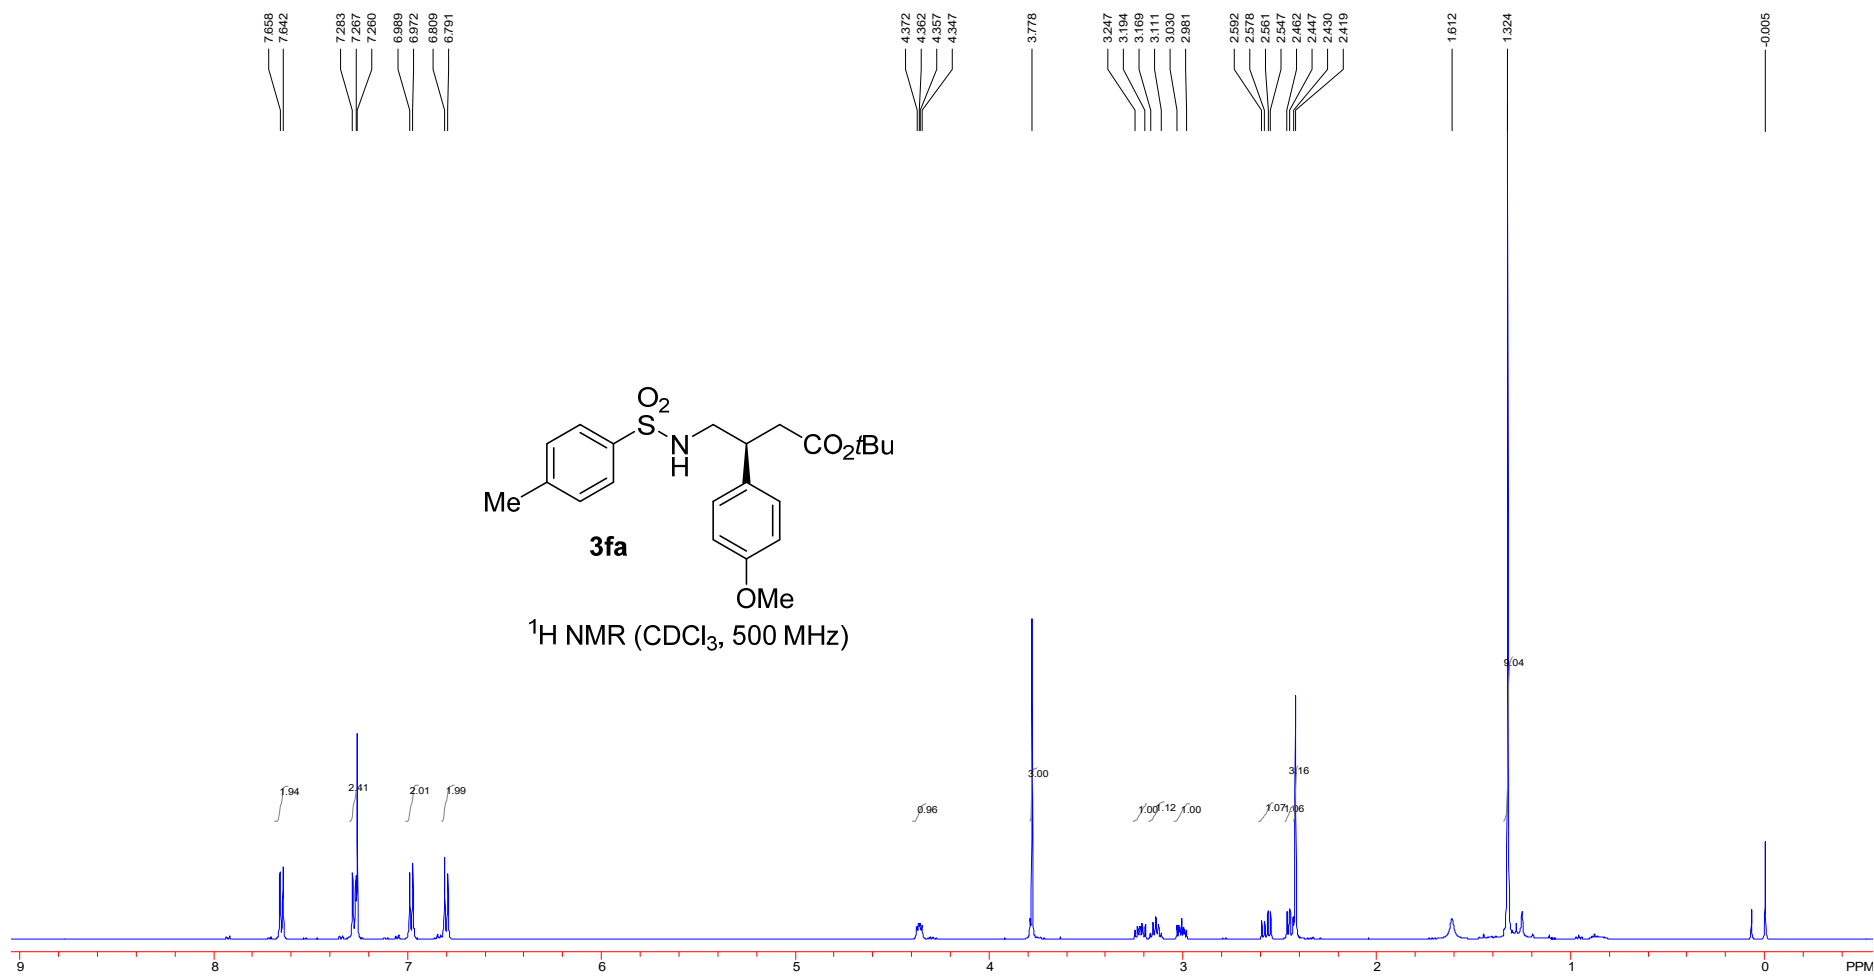

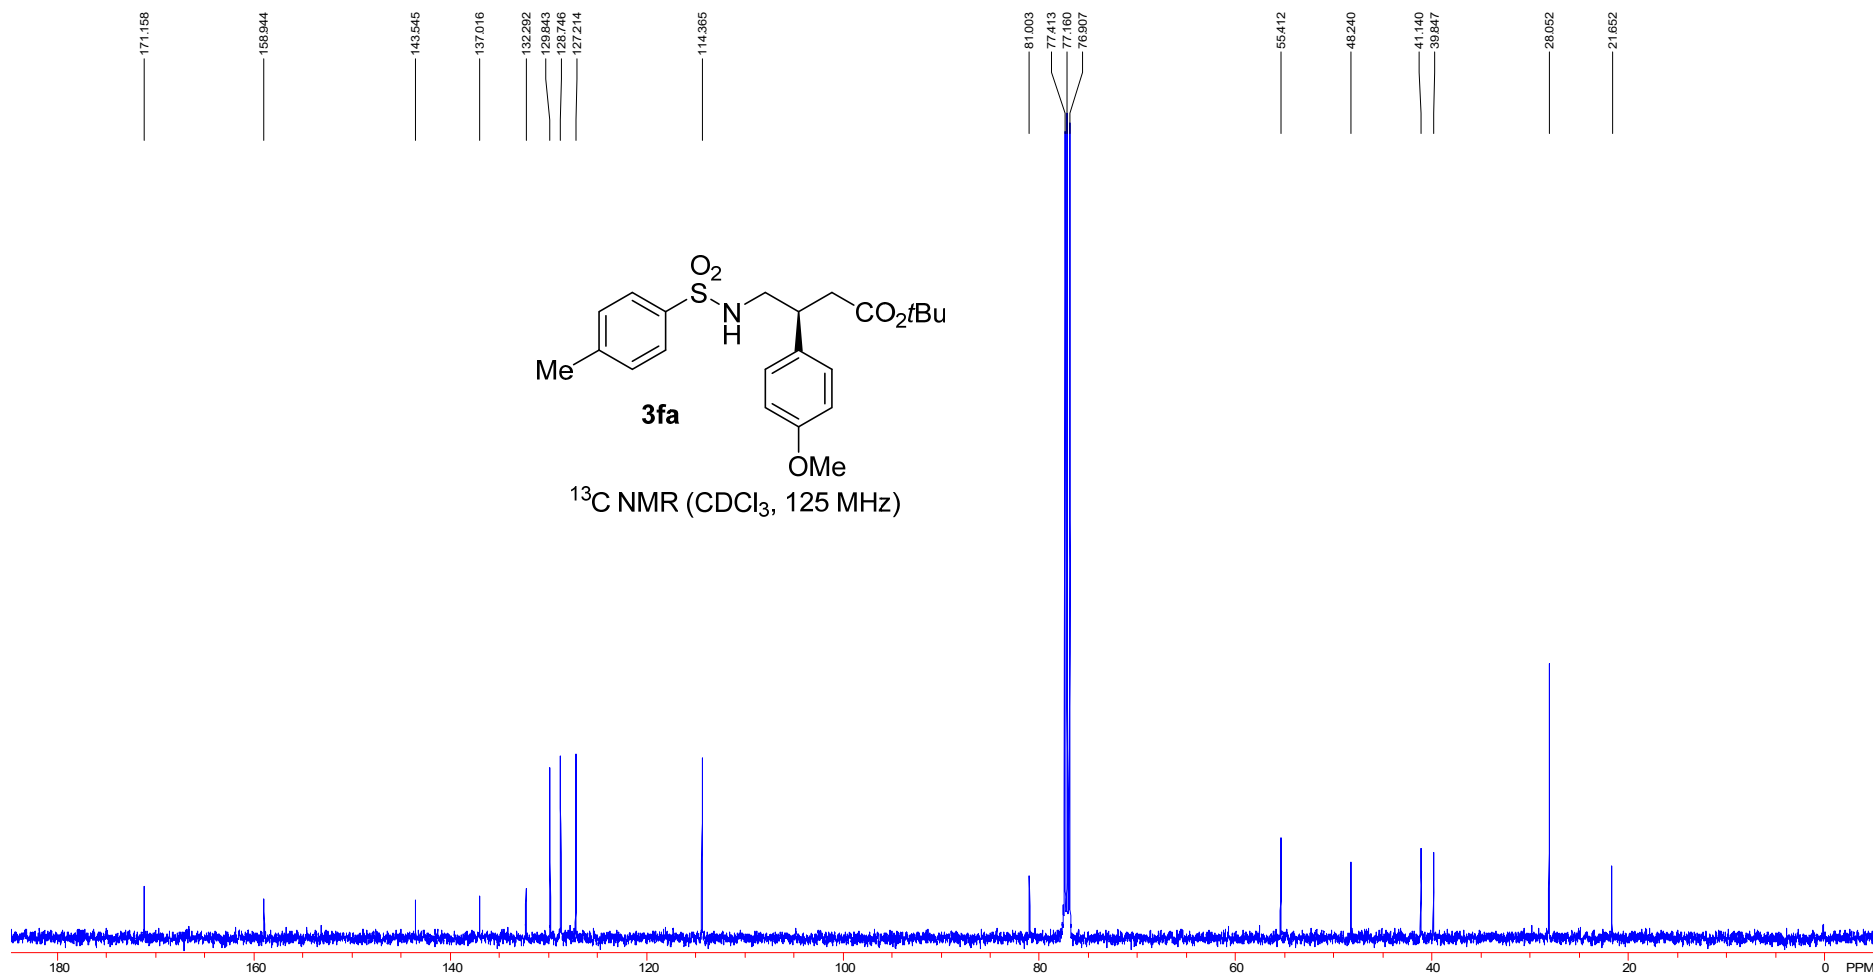

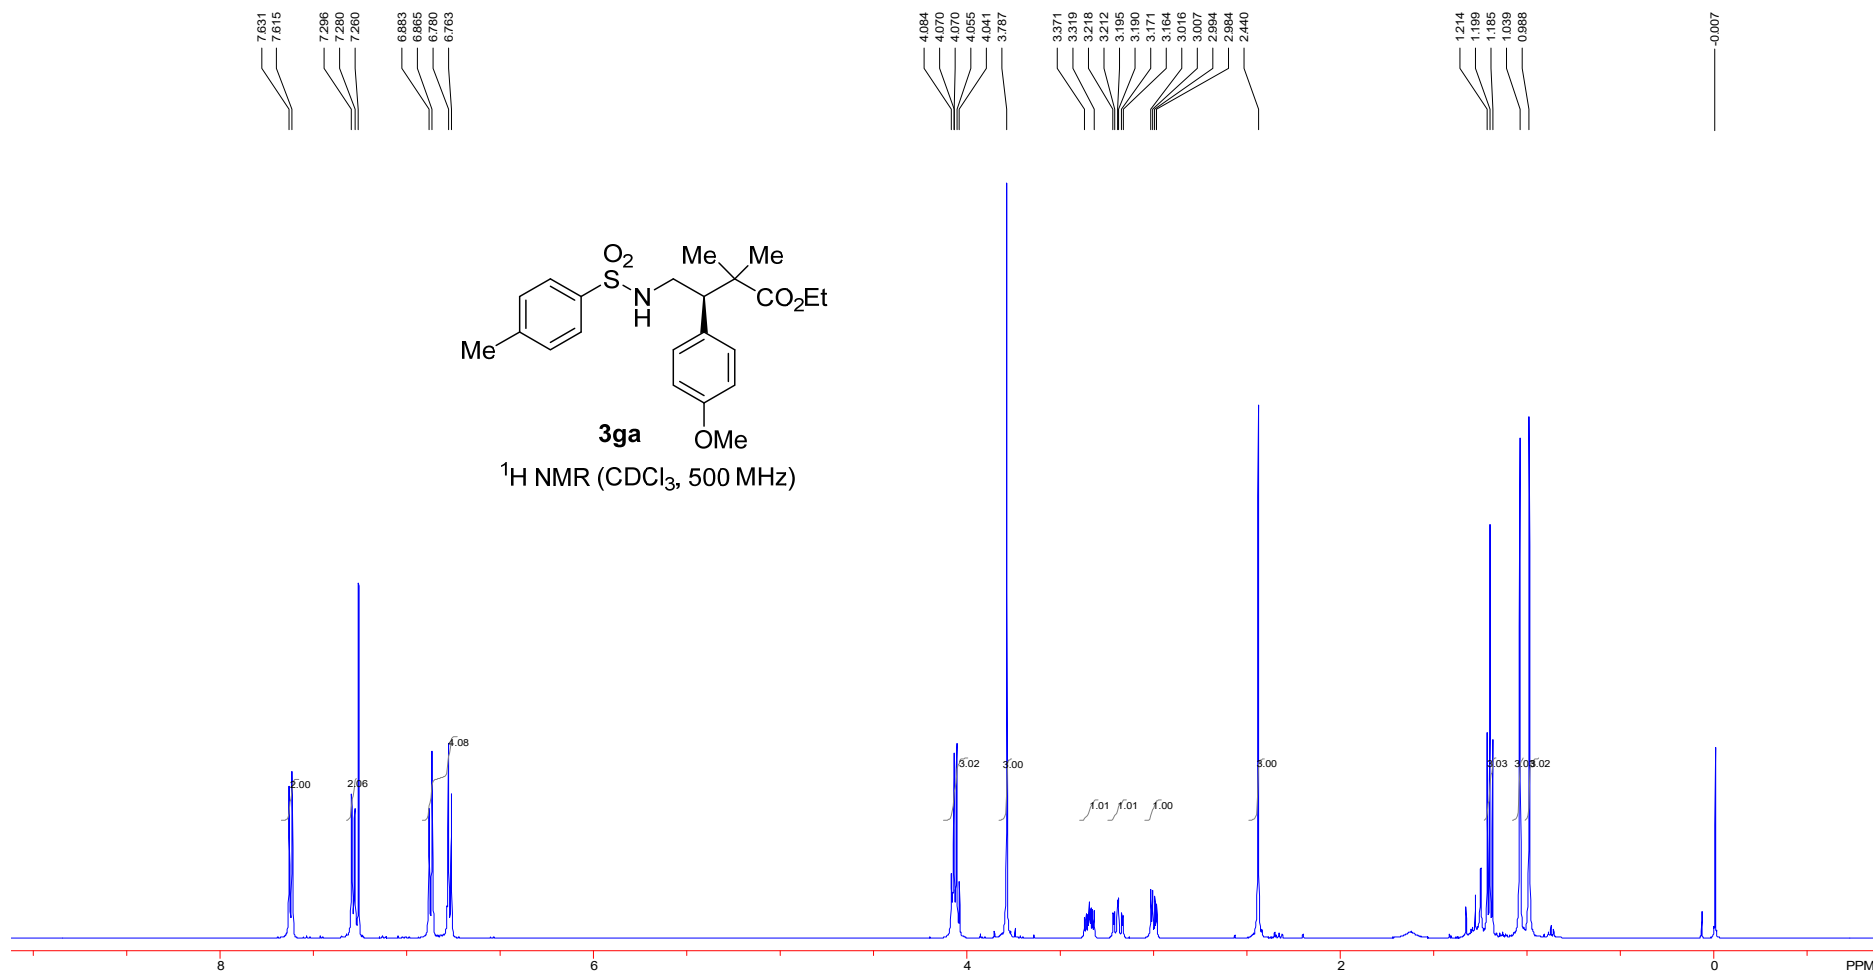

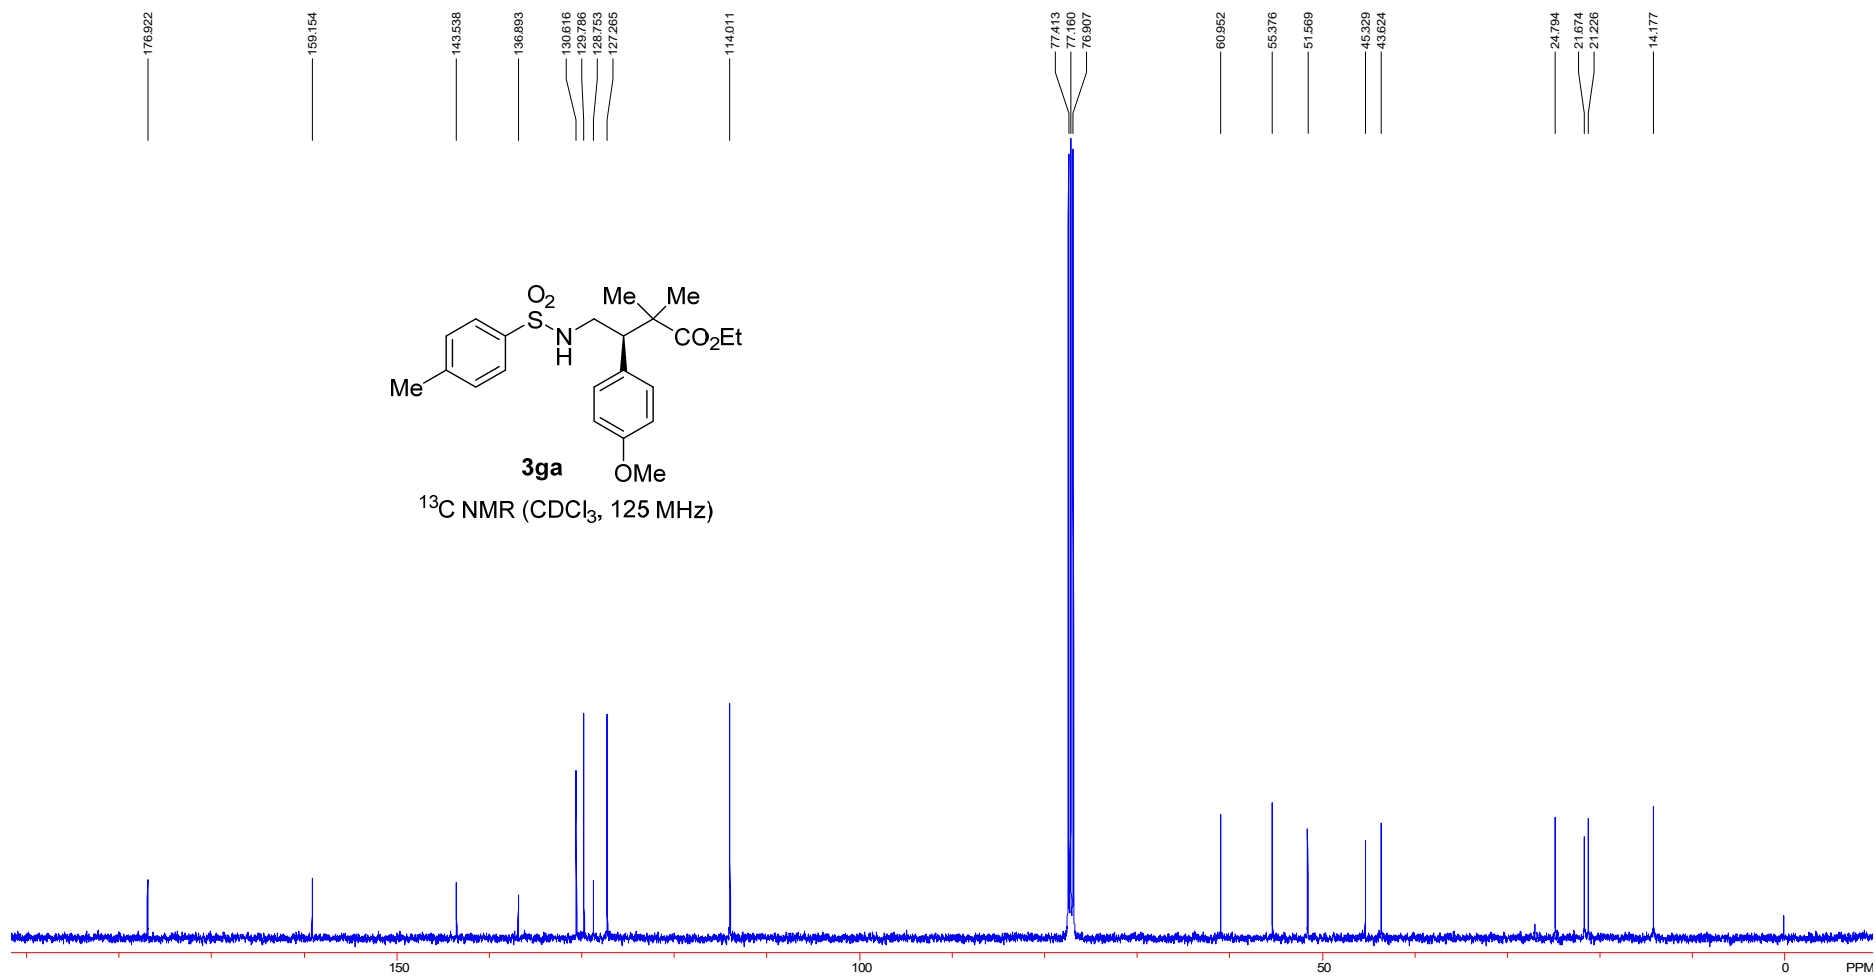



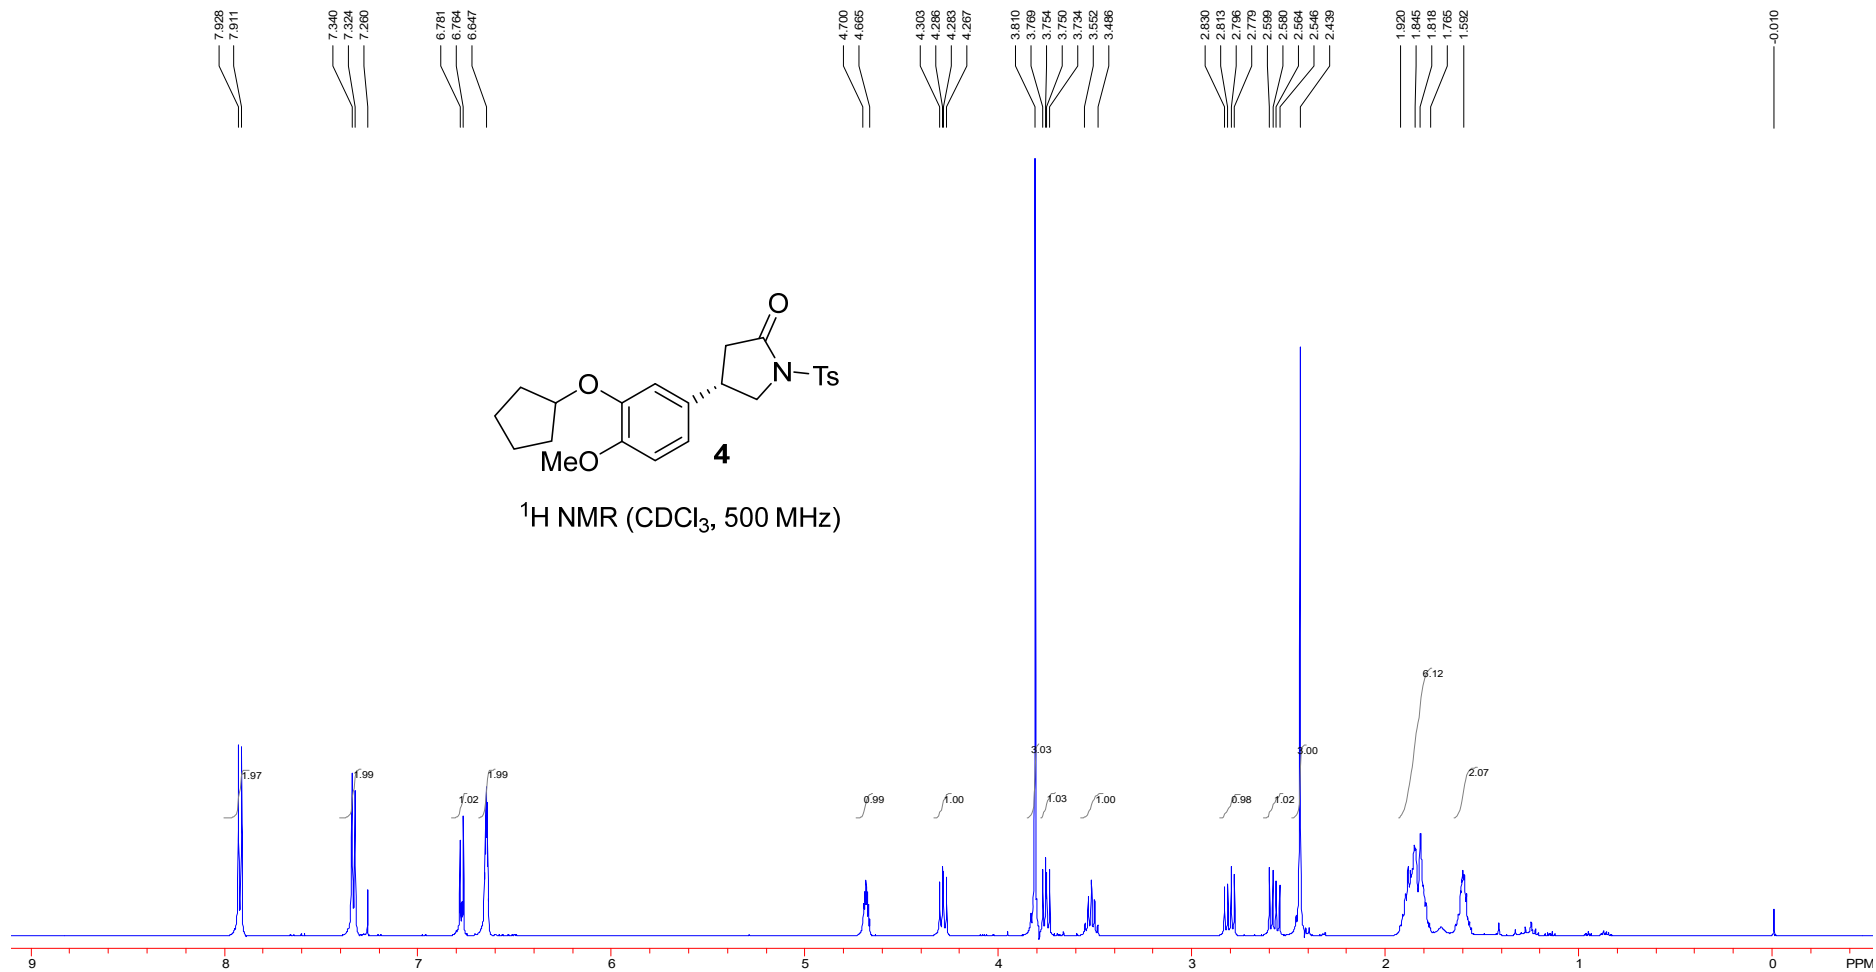

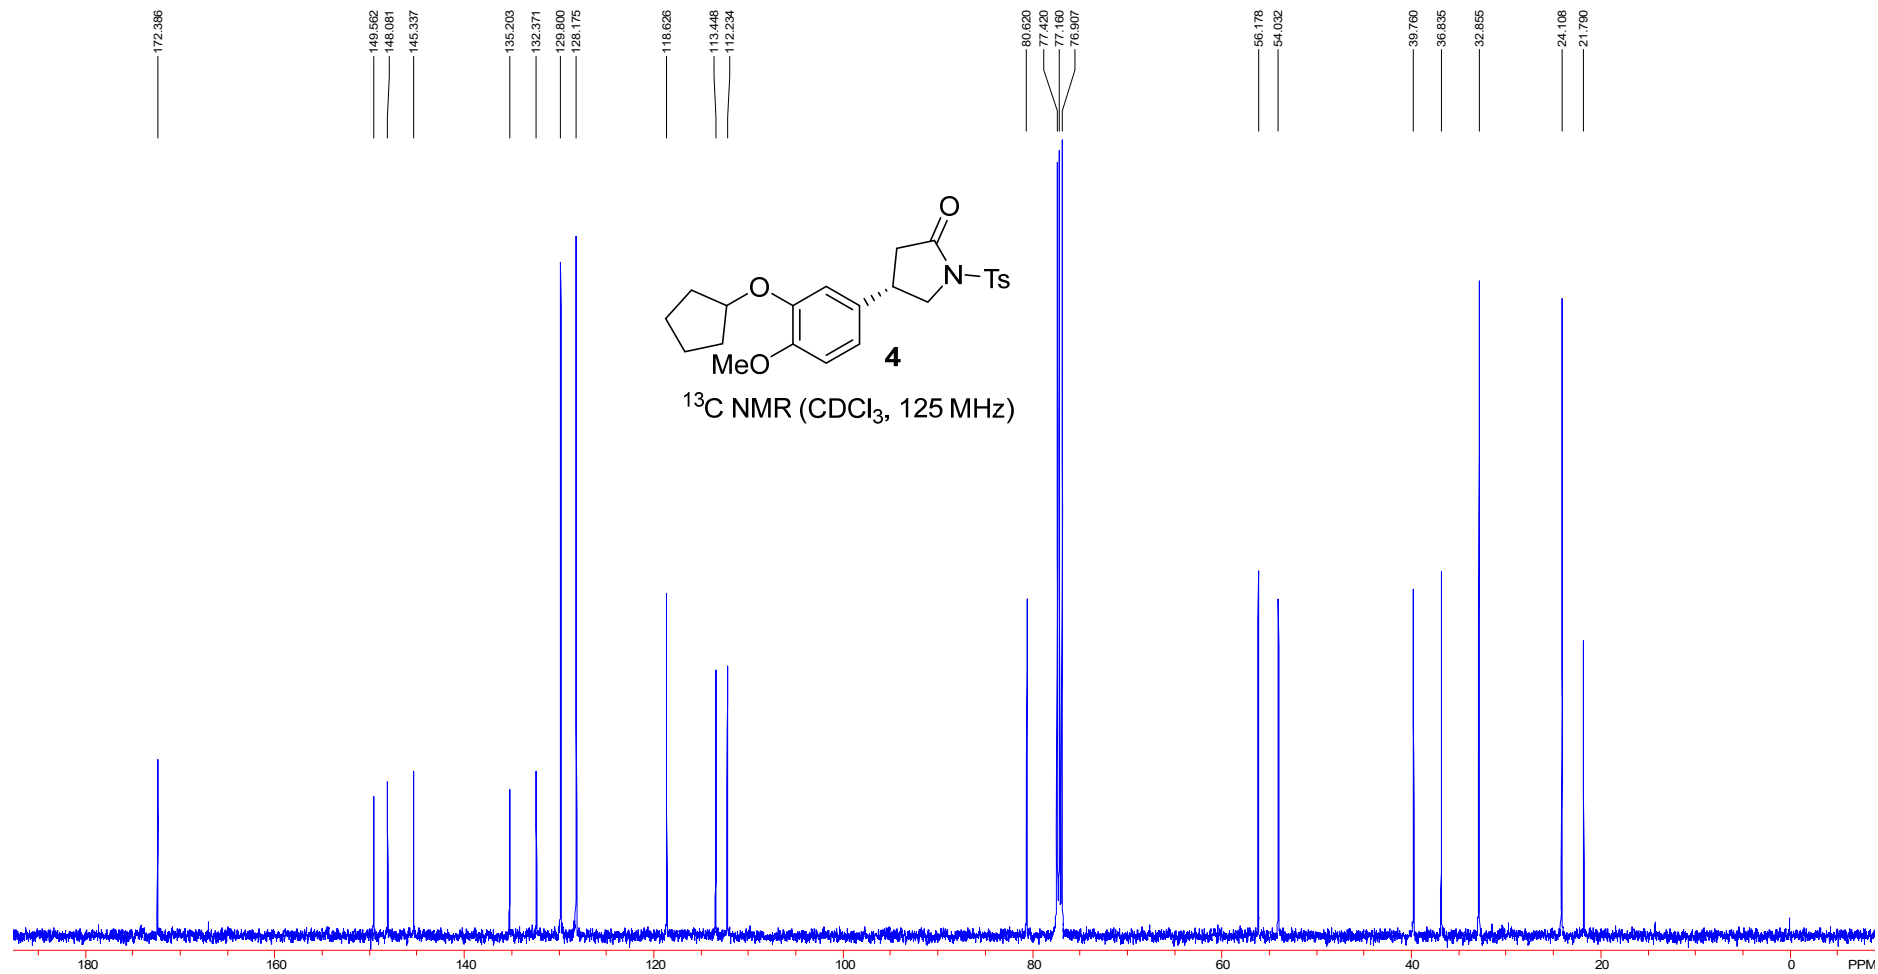

Supplement: d2qo00450j1.pdf [file d2qo00450j1.pdf]
